# Supplementary material for: Turnover of sex chromosomes in the Lake Tanganyika cichlid tribe Tropheini (Teleostei: Cichlidae)
Source: PubMed Central journal article supplement (PMC10828463; doi:10.1038/s41598-024-53021-3), 2024-01-30

## **Extended Supplementary Figures**

### **Turnover of Sex Chromosomes in the Lake Tanganyika cichlid tribe Tropheini (Teleostei: *Cichlidae*)**

**Kristen A. Behrens<sup>1</sup>, Holger Zimmermann<sup>2,3</sup>, Radim Blažek<sup>2</sup>, Martin Reichard<sup>2,4</sup>, Stephan Koblmüller<sup>3</sup>, Thomas D. Kocher<sup>1</sup>**

<sup>1</sup> Department of Biology, University of Maryland, College Park MD 20742 USA

<sup>2</sup> Czech Academy of Sciences, Institute of Vertebrate Biology, Květná 8, 603 00 Brno, Czech Republic

<sup>3</sup> Institute of Biology, University of Graz, Universitätsplatz 2, 8010 Graz, Austria

<sup>4</sup> Department of Ecology and Vertebrate Zoology, University of Łódź, Łódź, Poland

## Extended Figures

Pairwise male vs. female  $F_{ST}$  and sex specific allele frequency plots for all species that are not featured in the main manuscript or main supplement. All plots are single individual vs. single individual unless headers in plot indicate transcriptome or pool-seq data. All plots use the *M. zebra* UMD2a reference assembly GCF\_000238955.4 (Conte 2019).

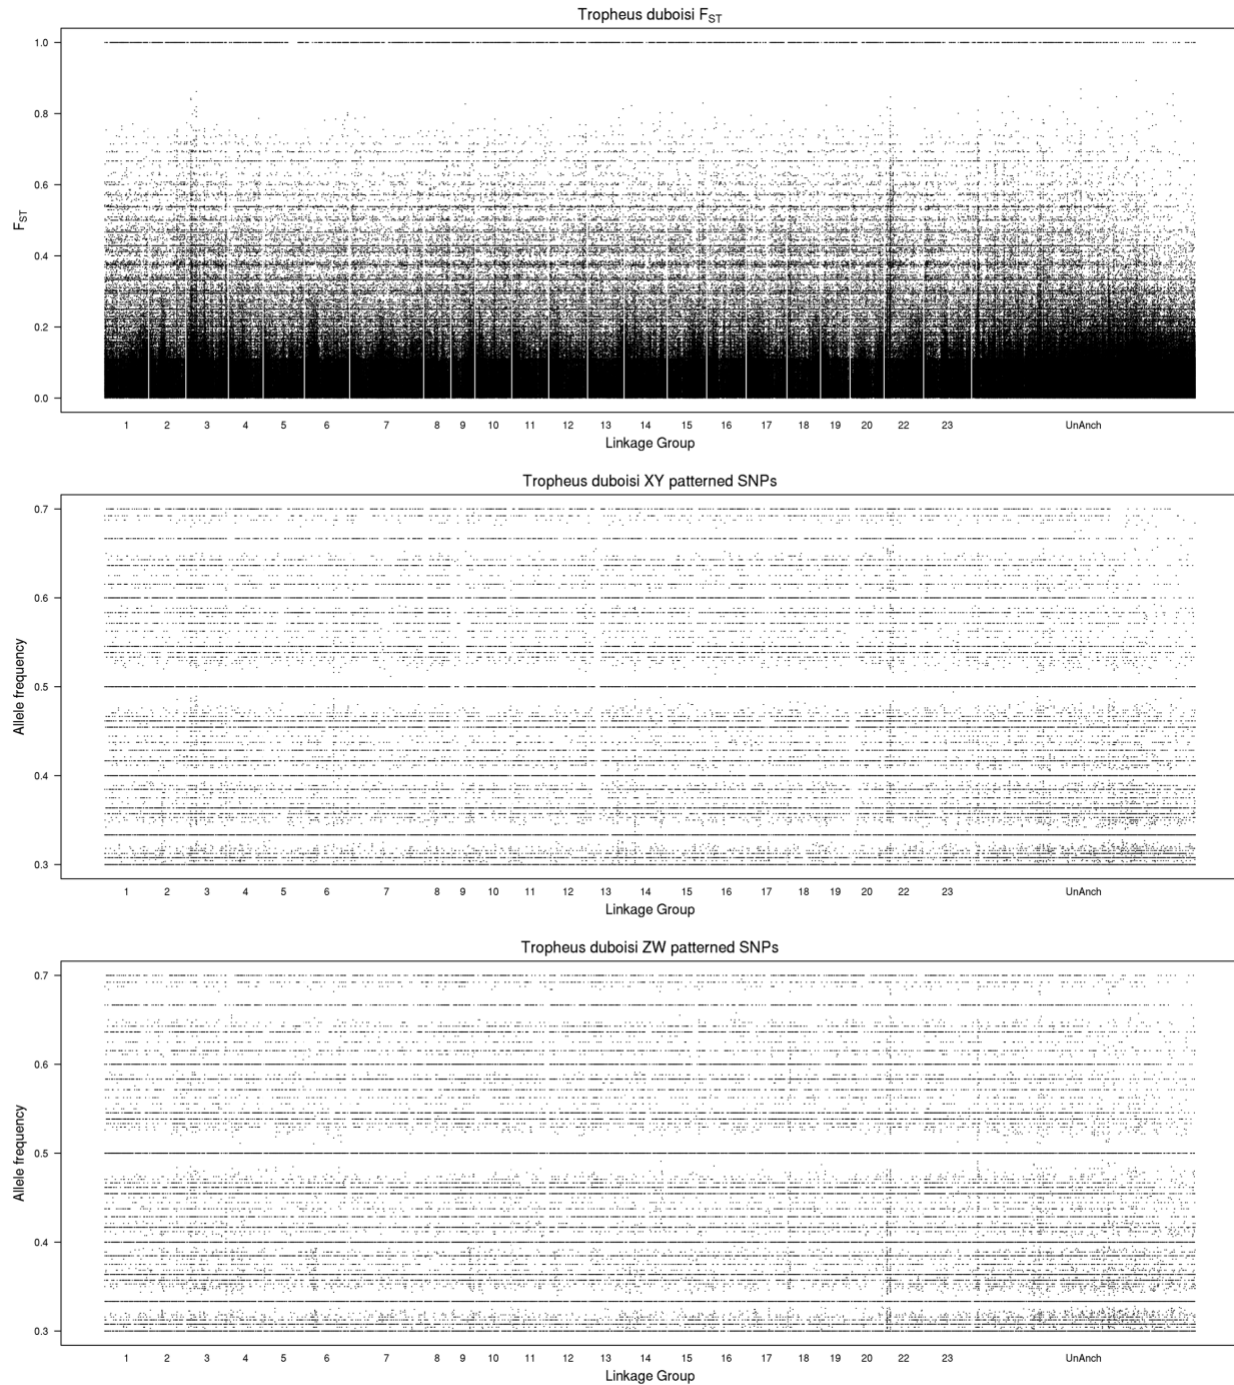

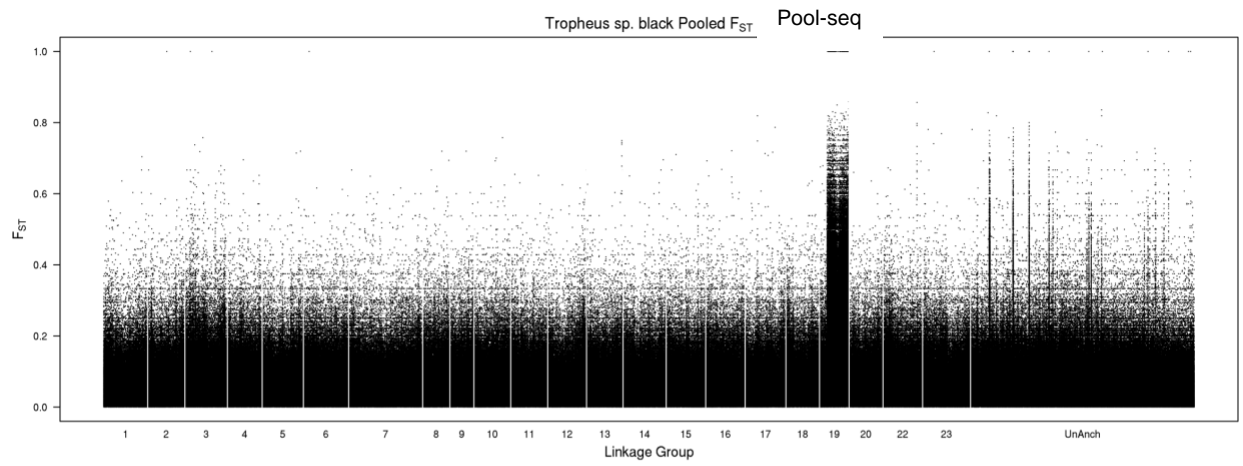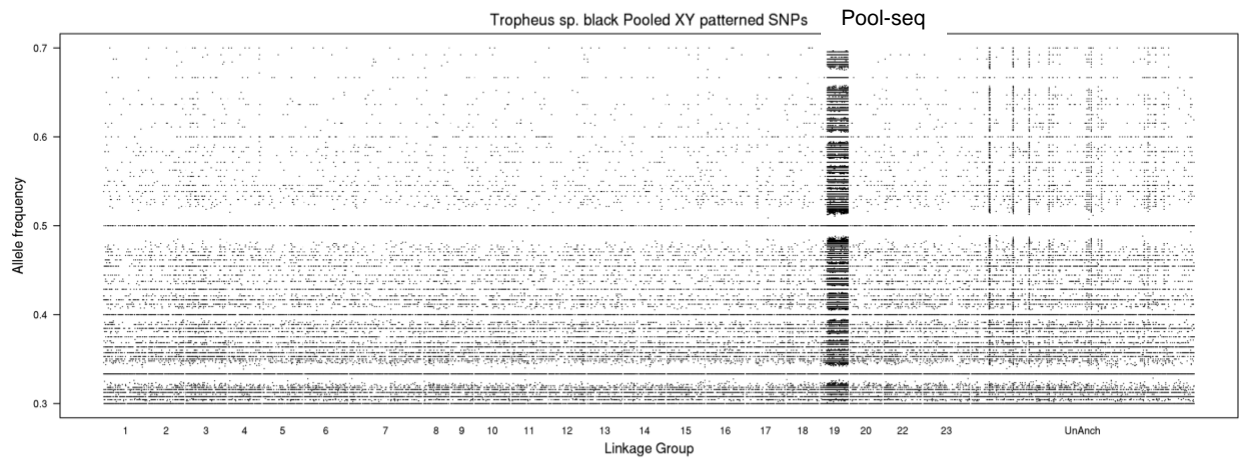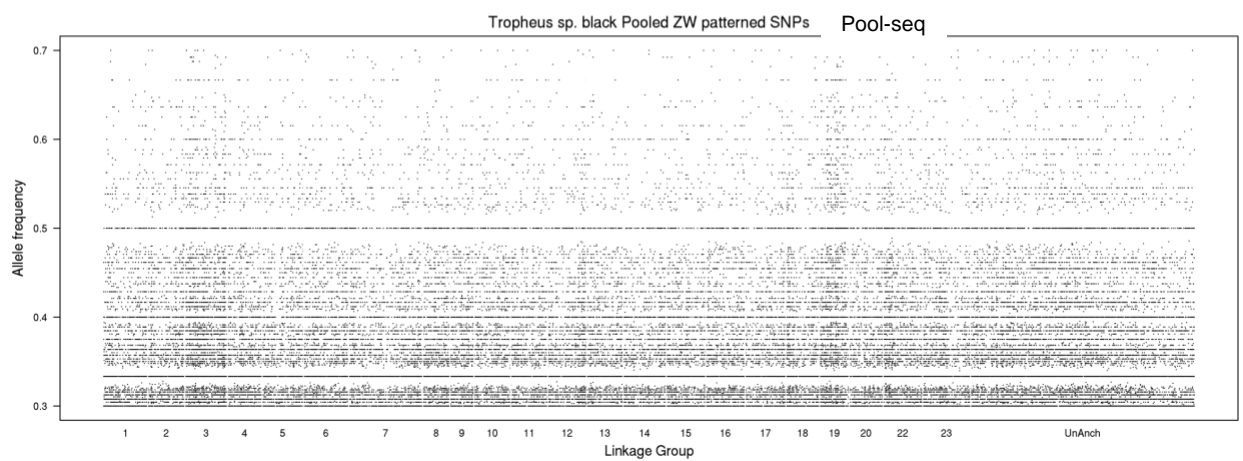

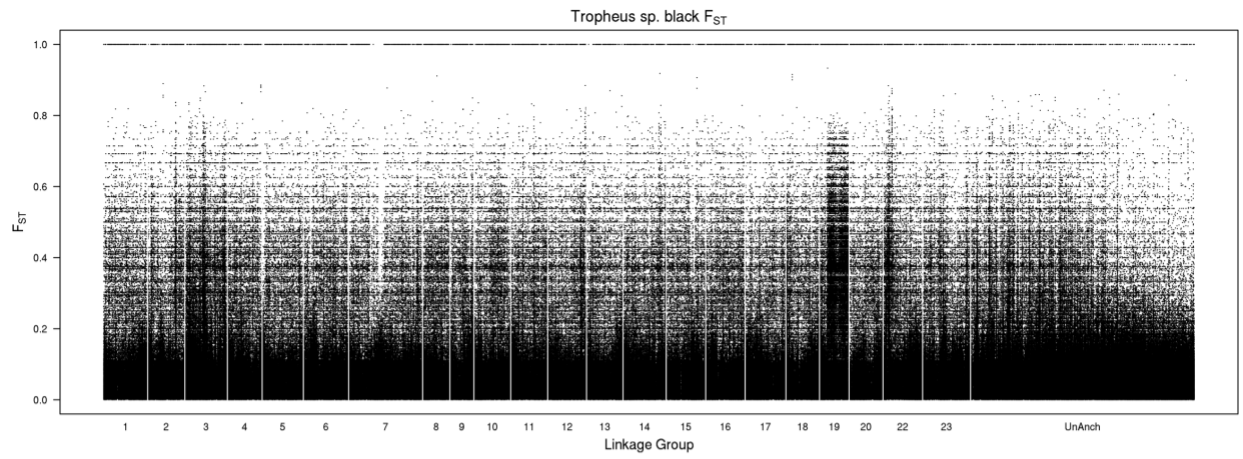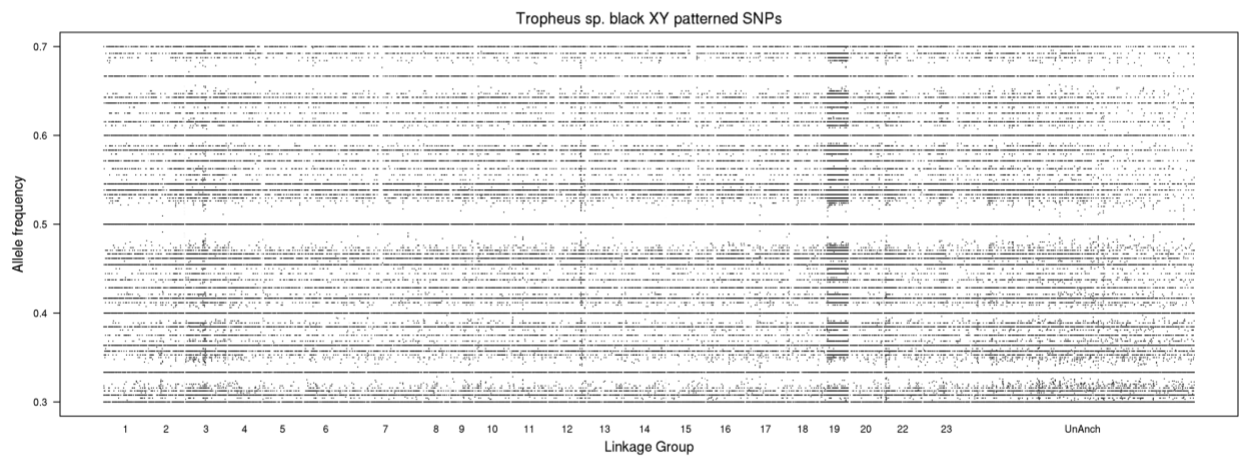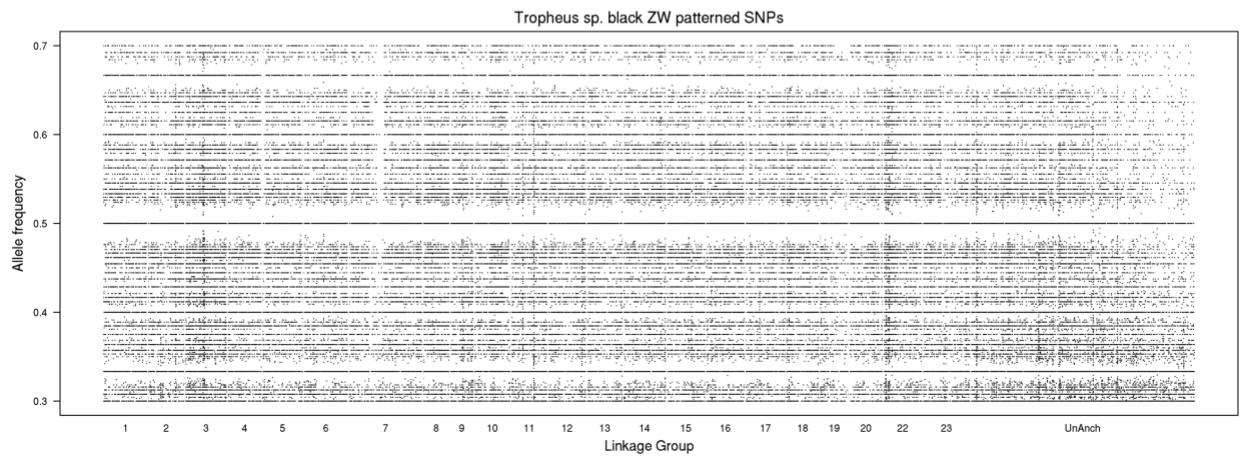

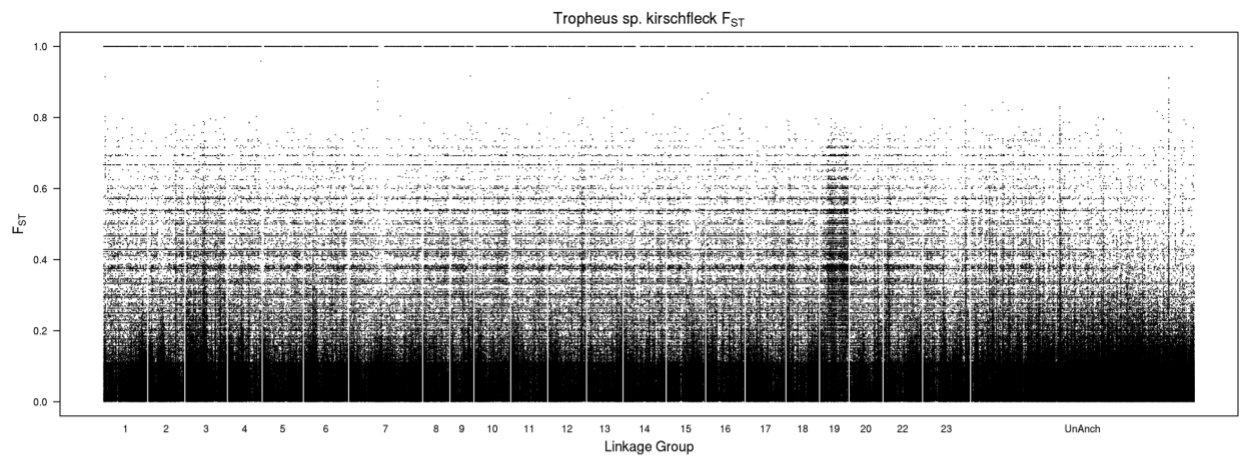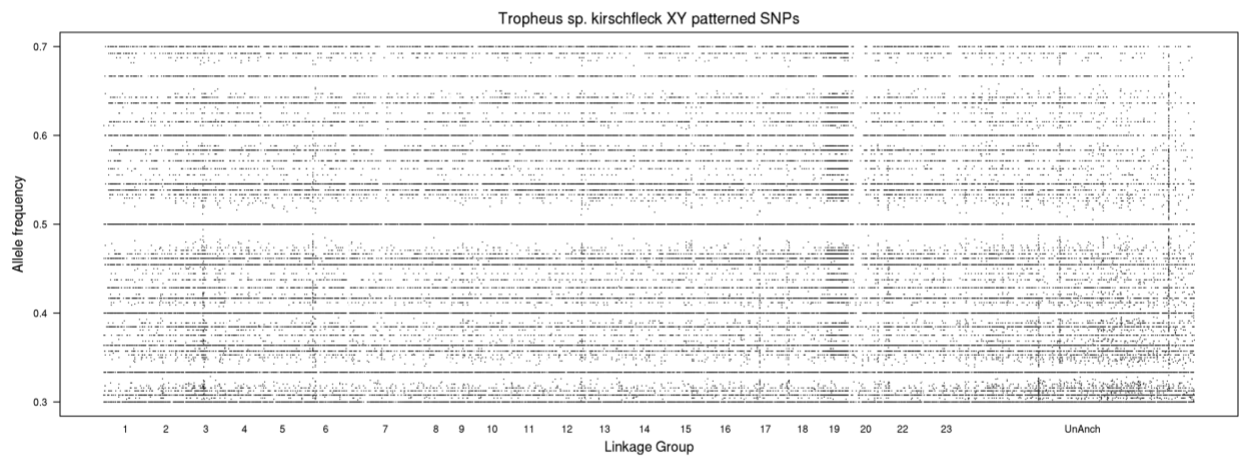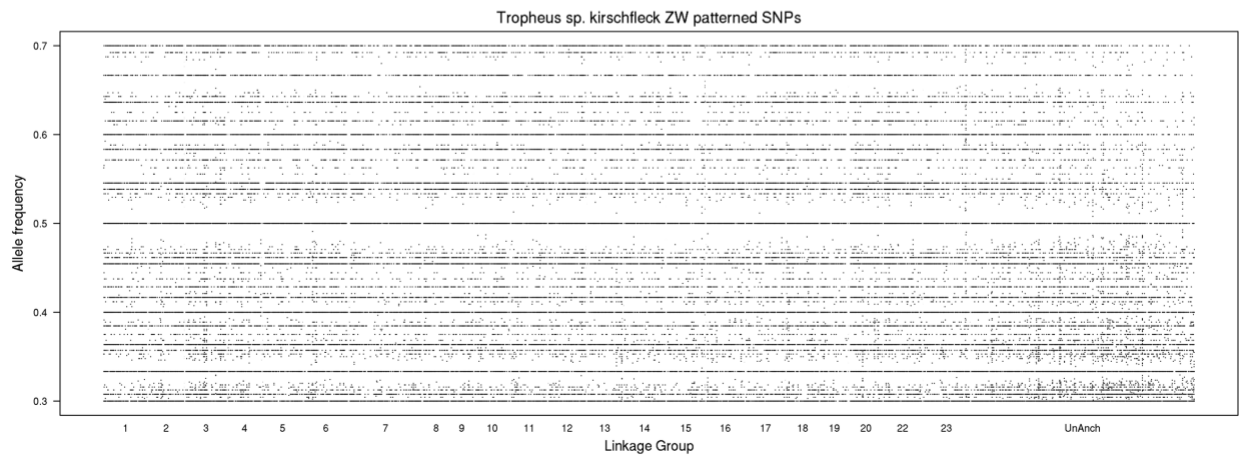

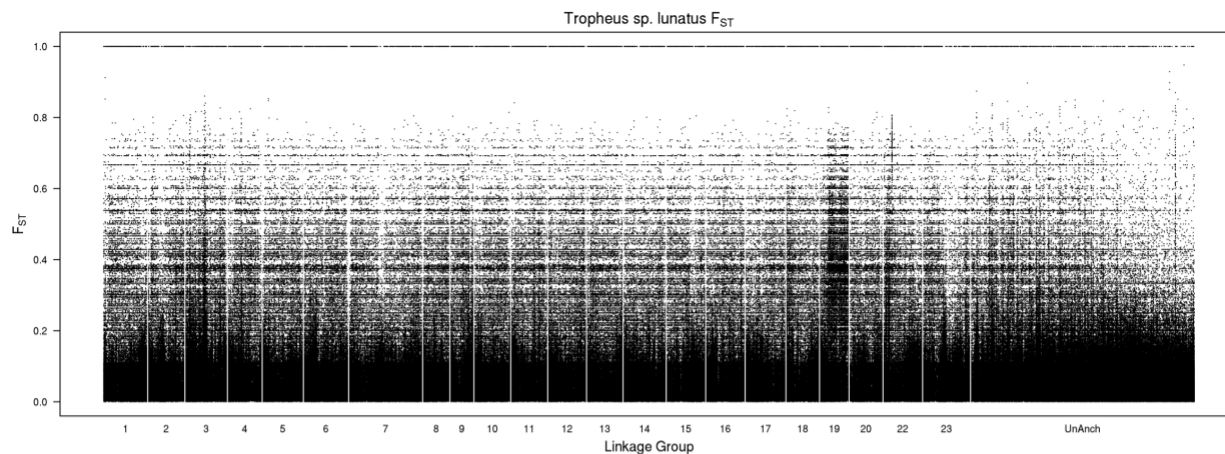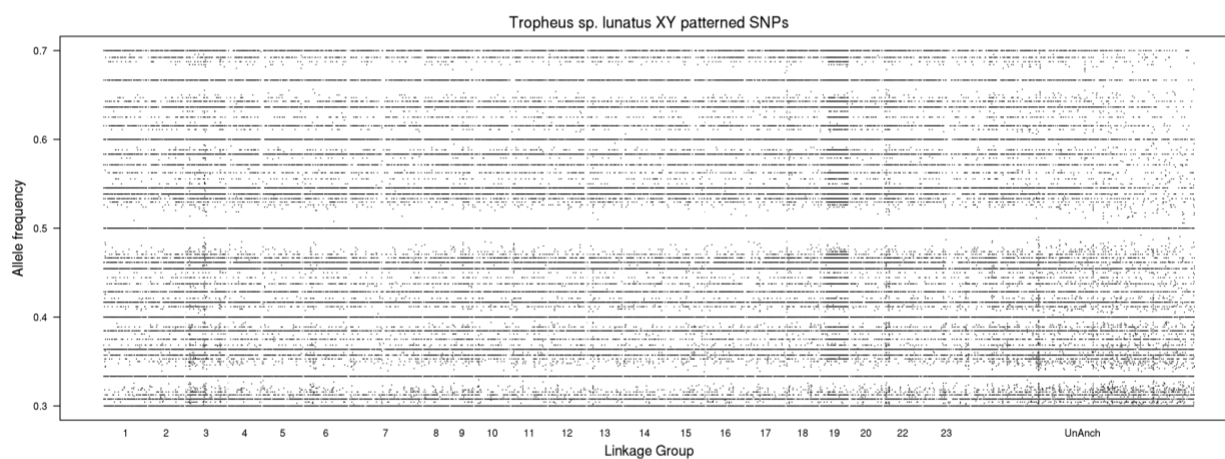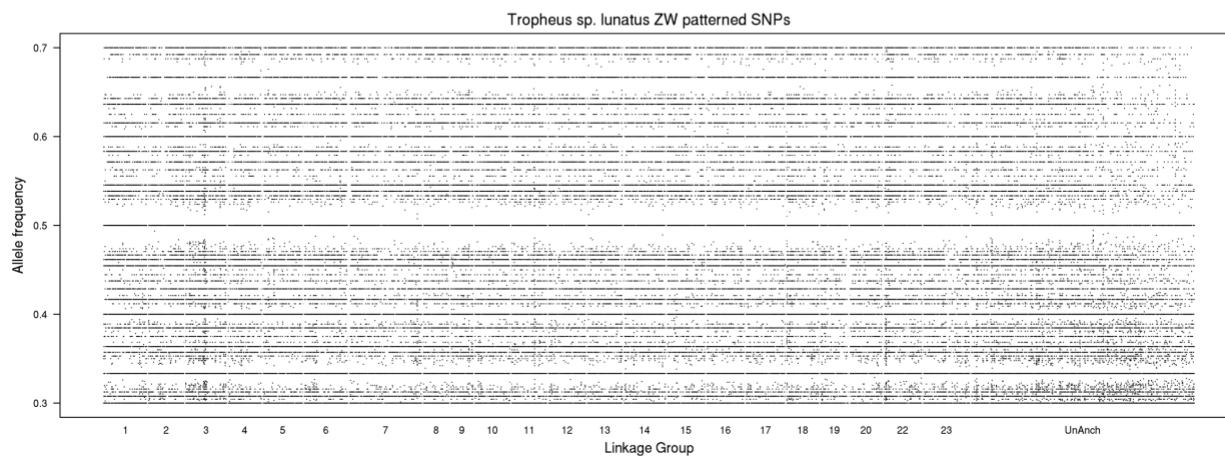

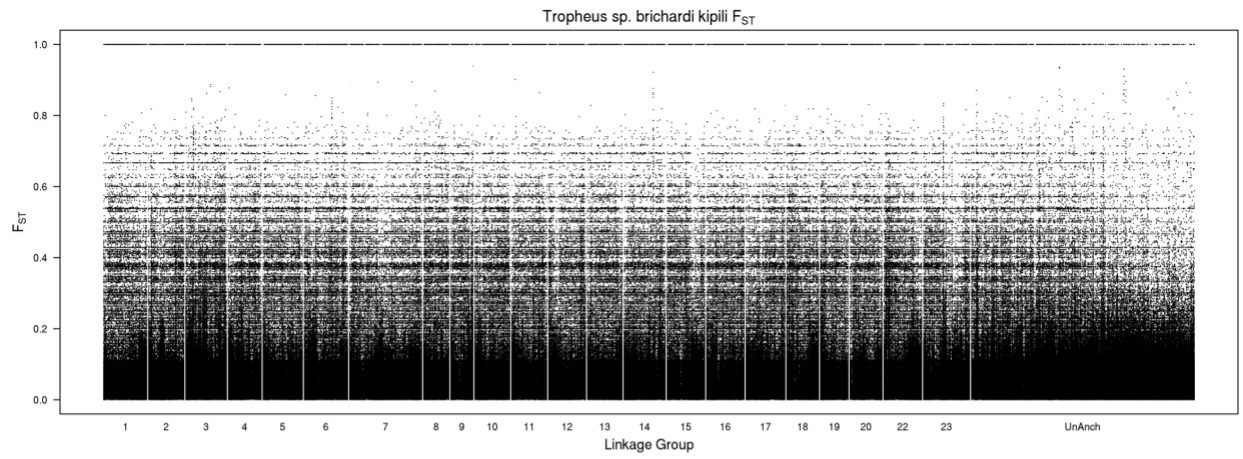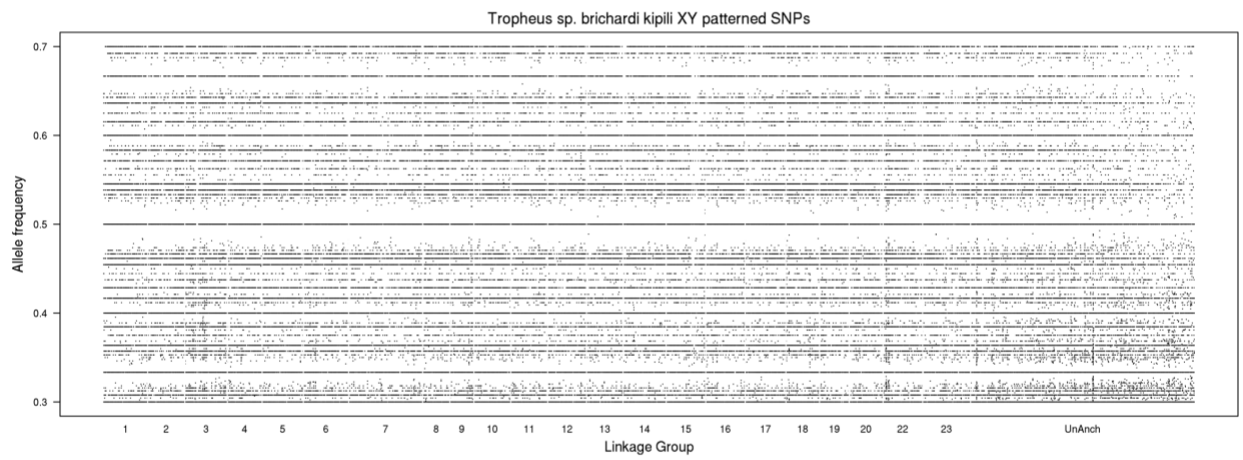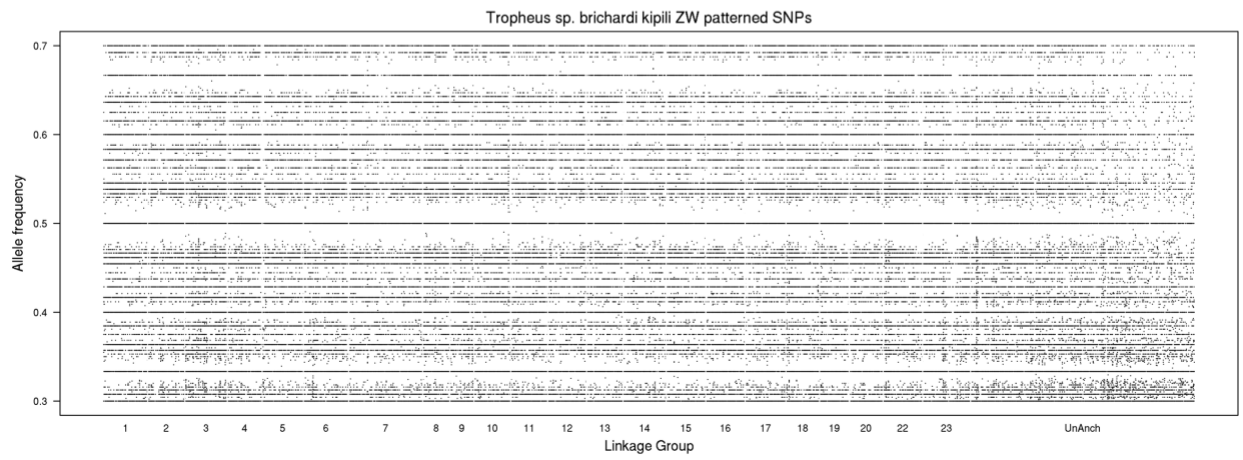

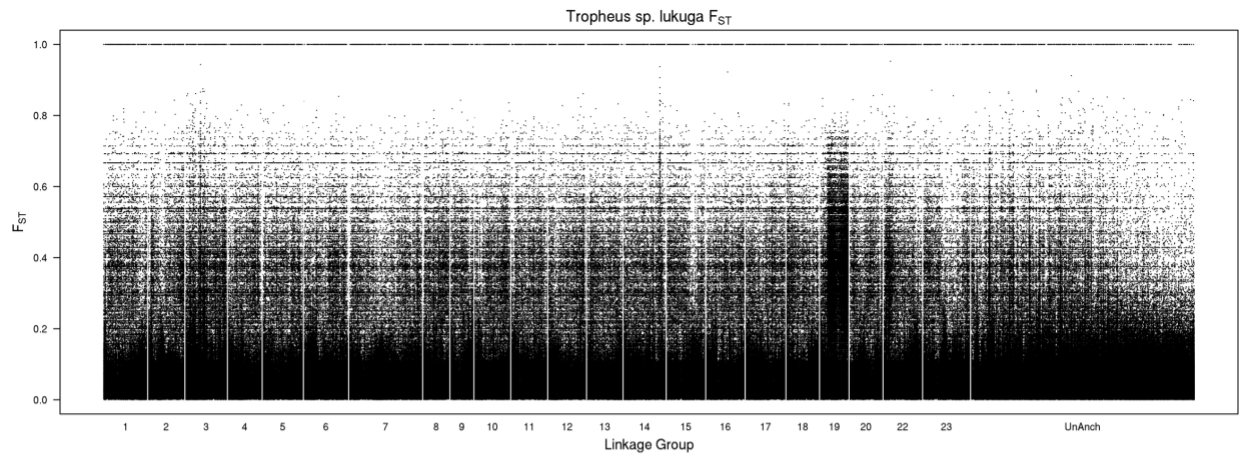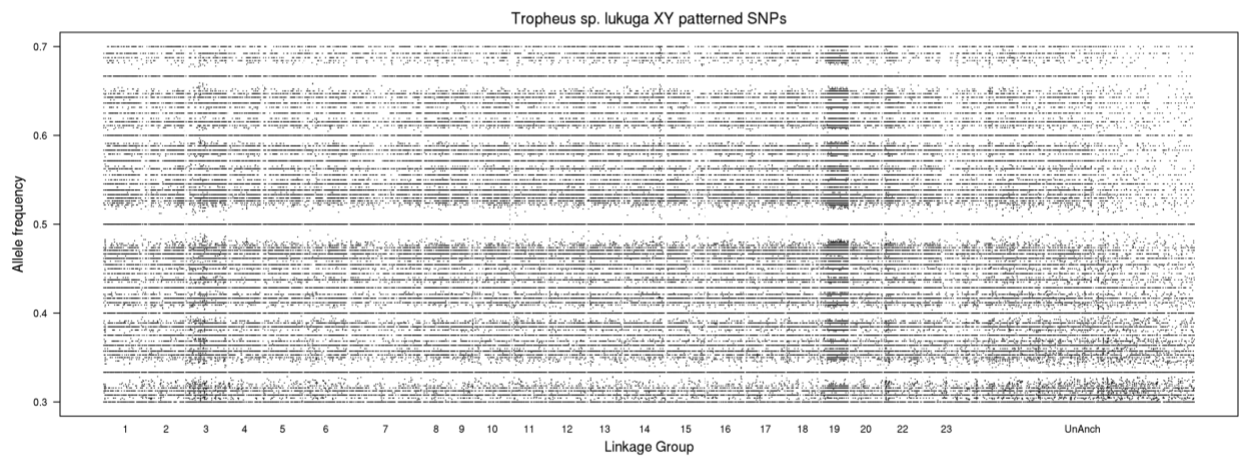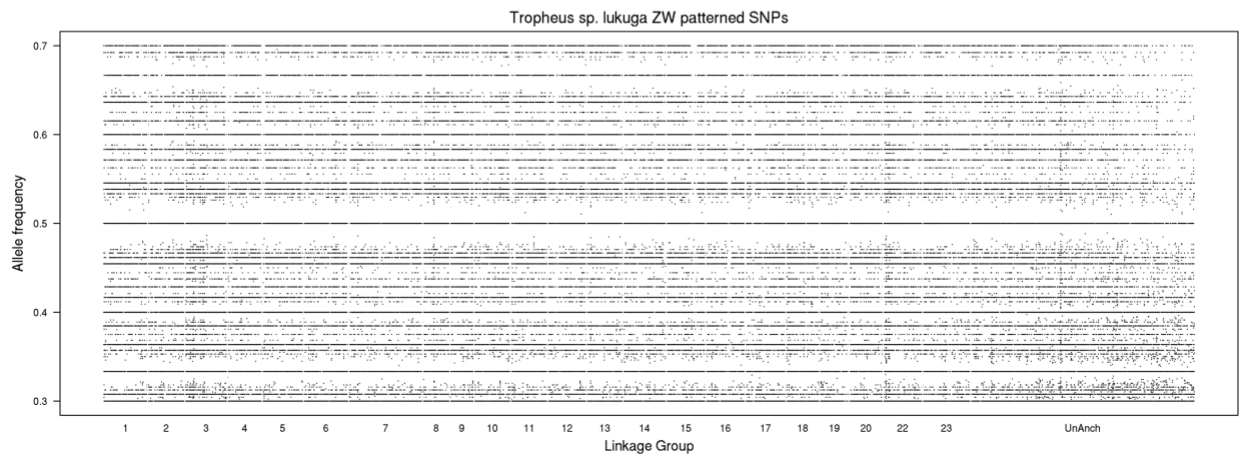



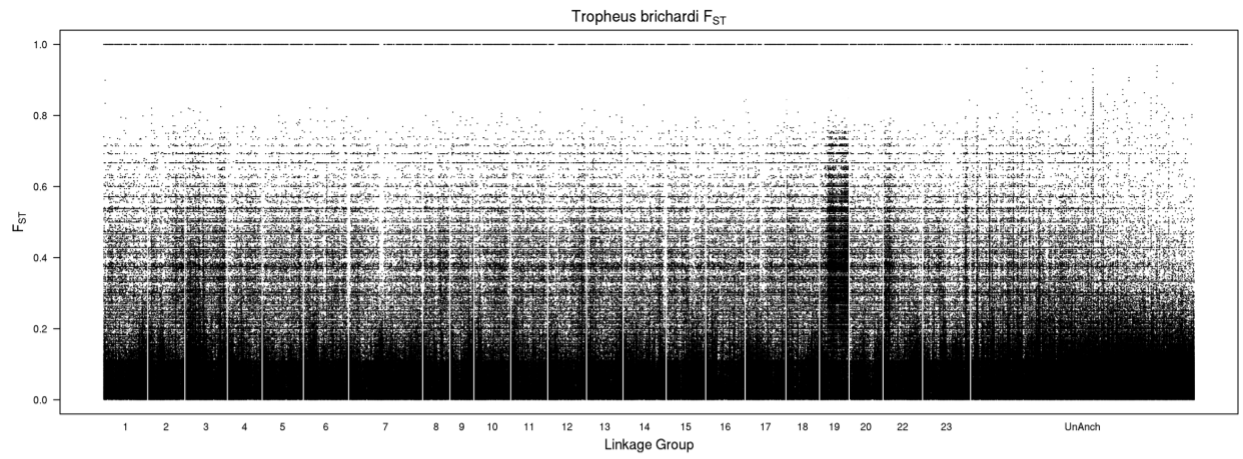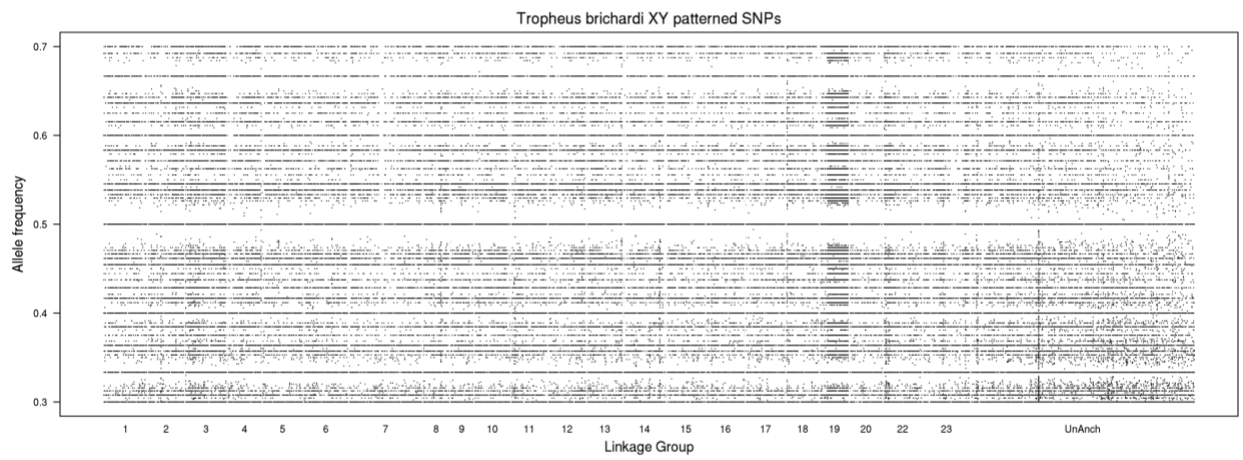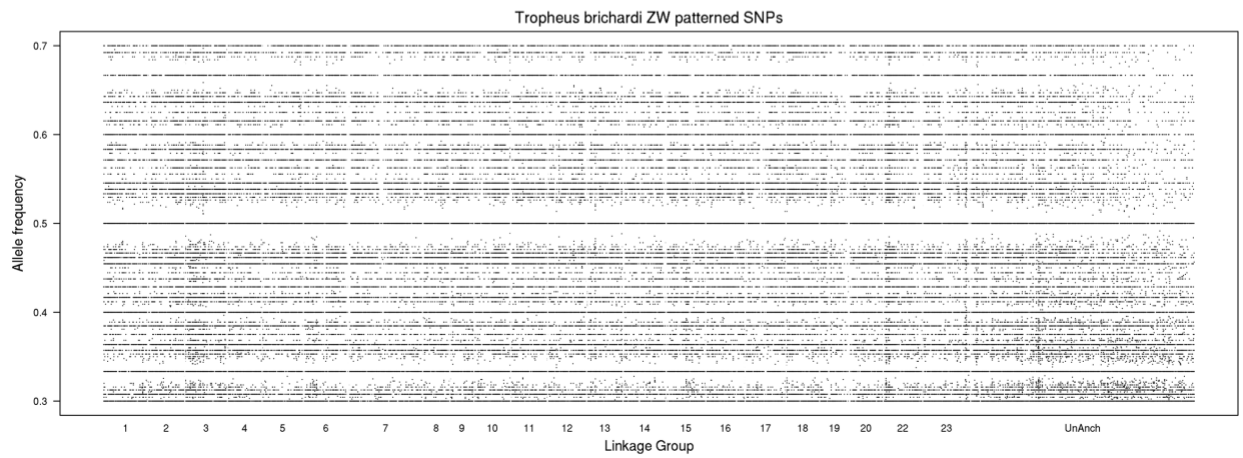

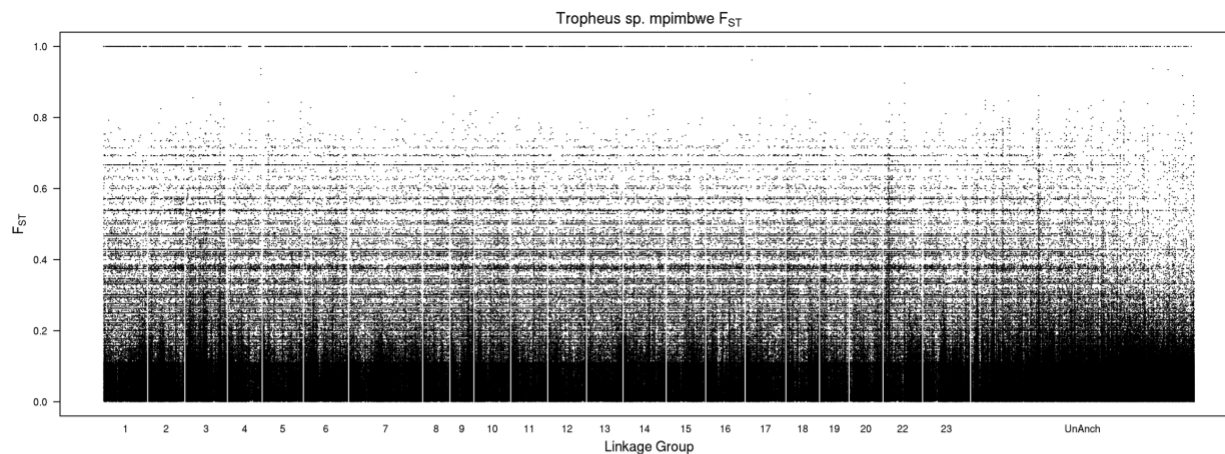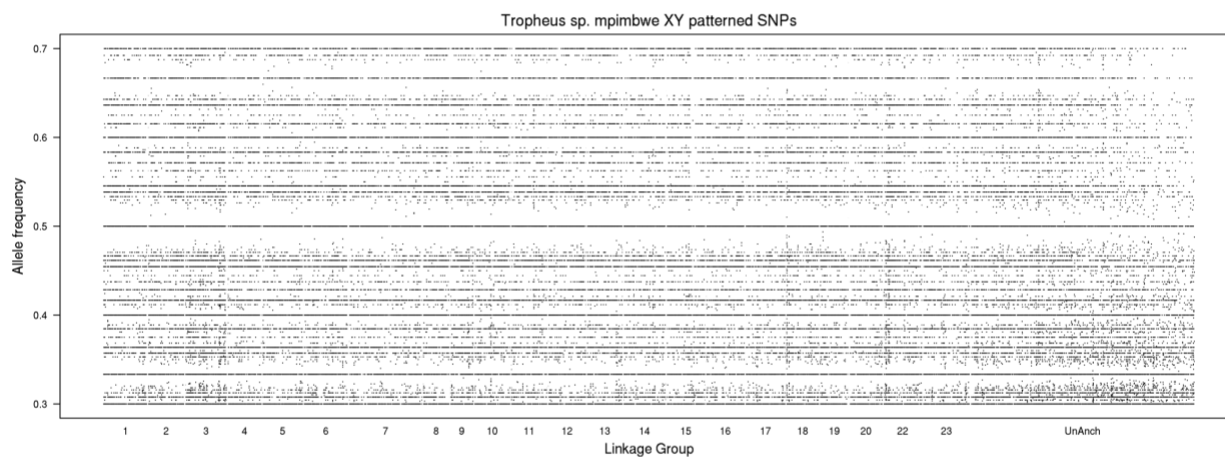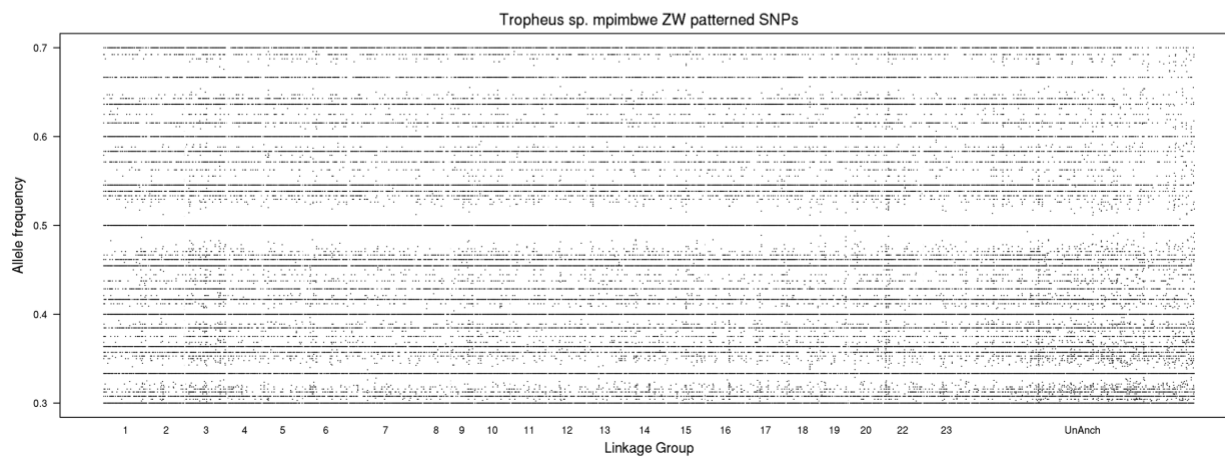

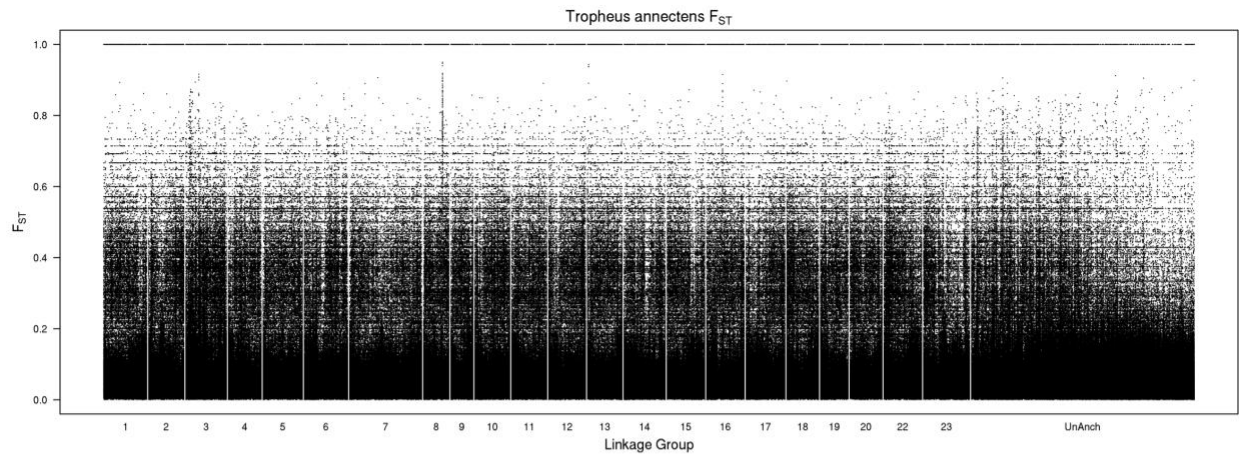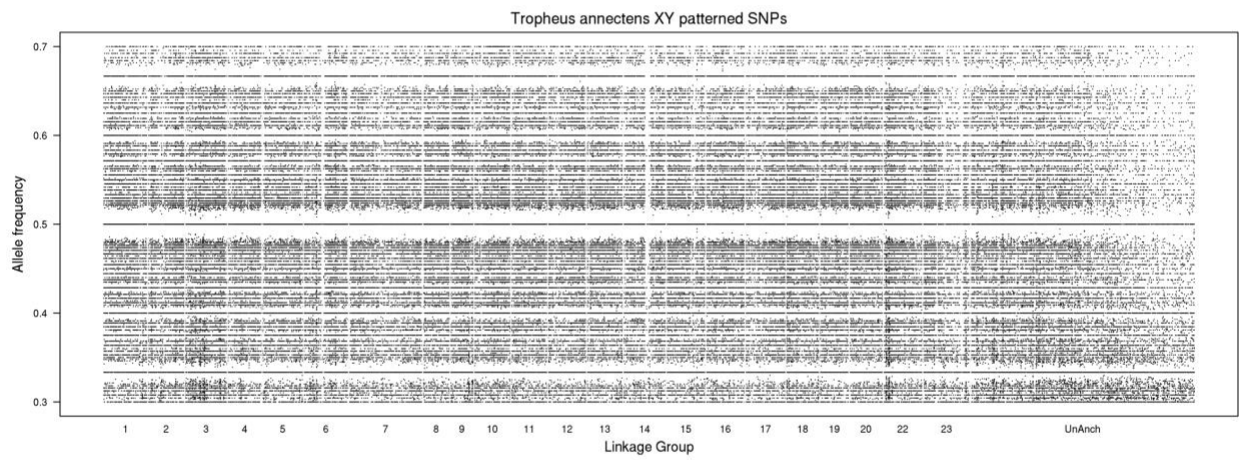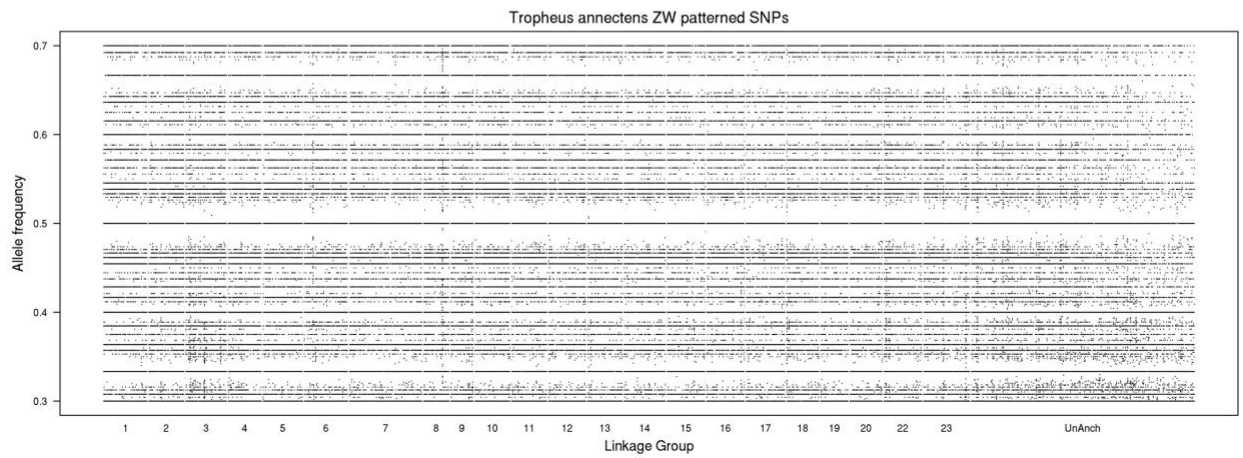

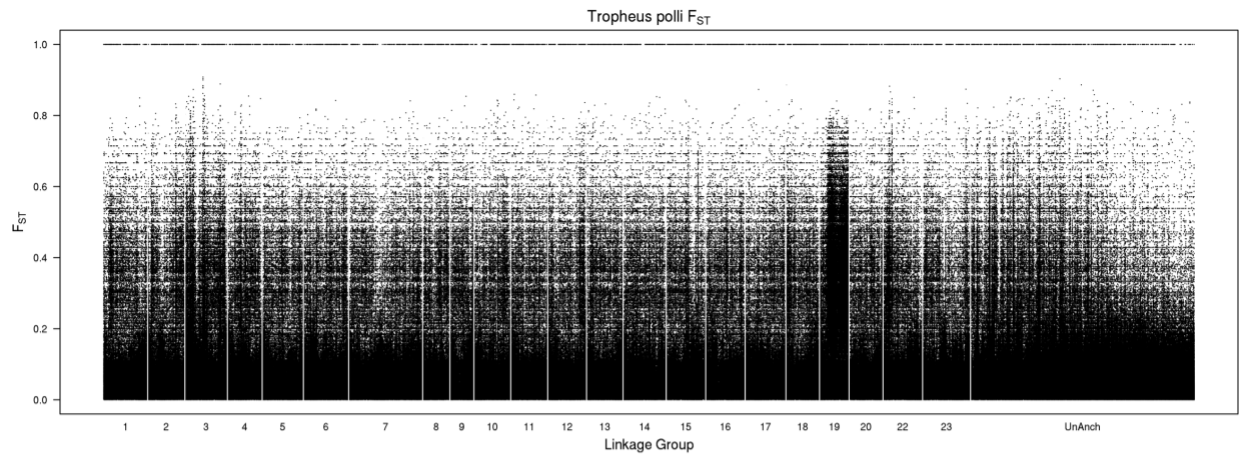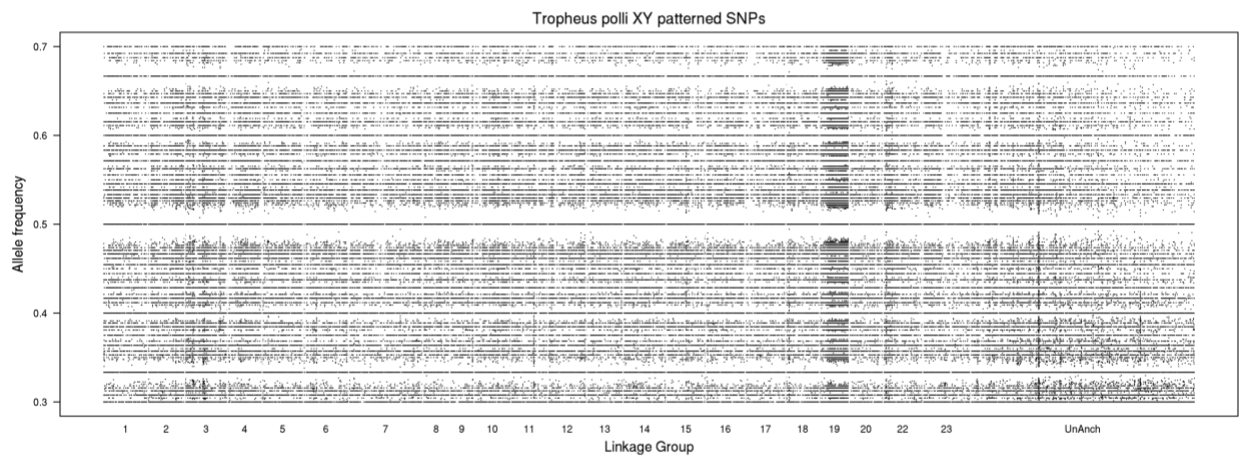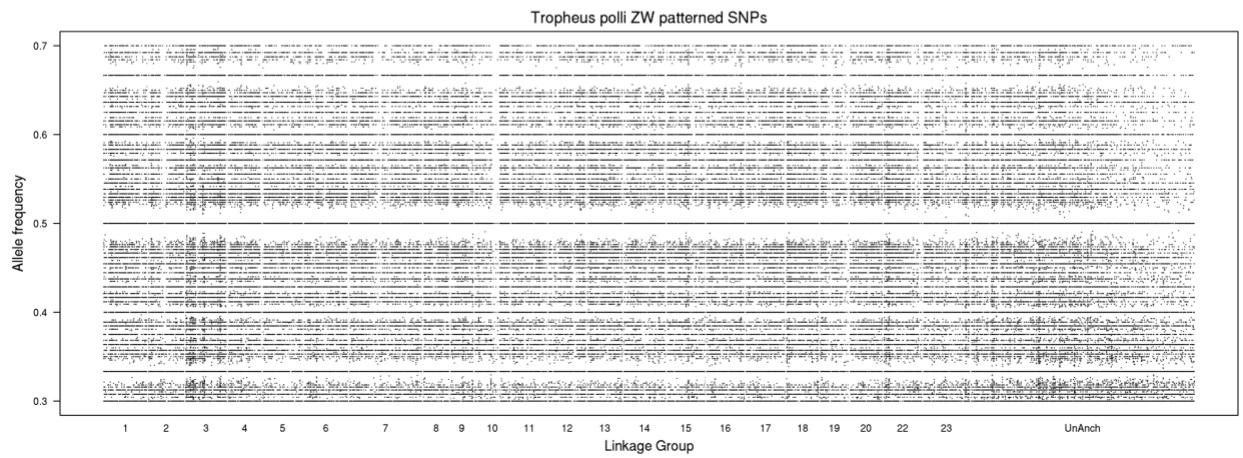

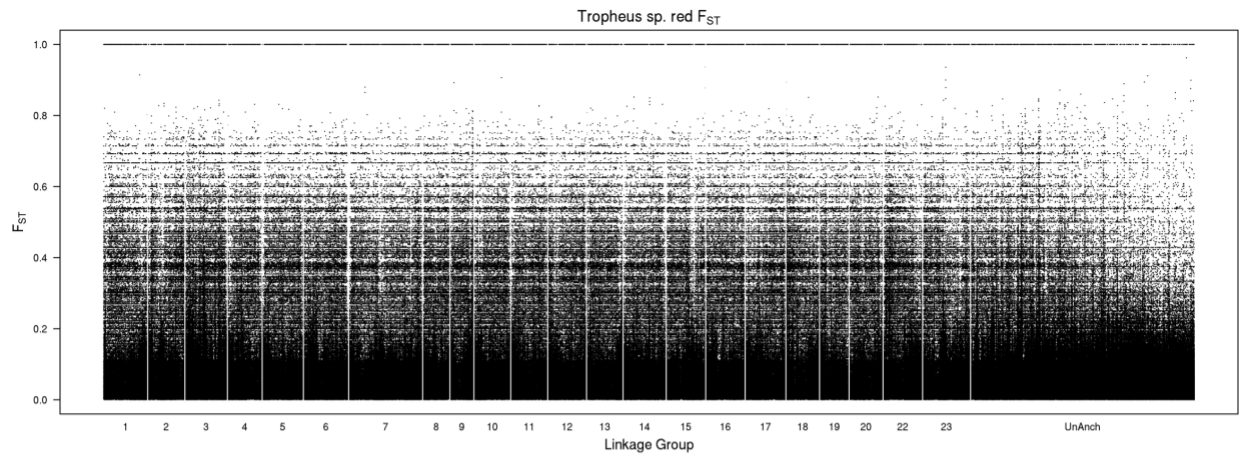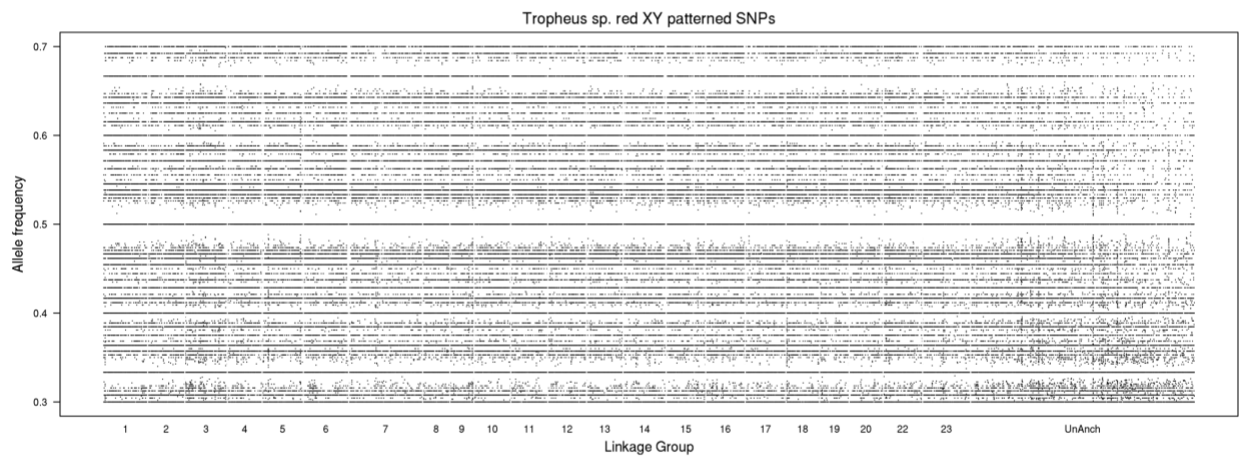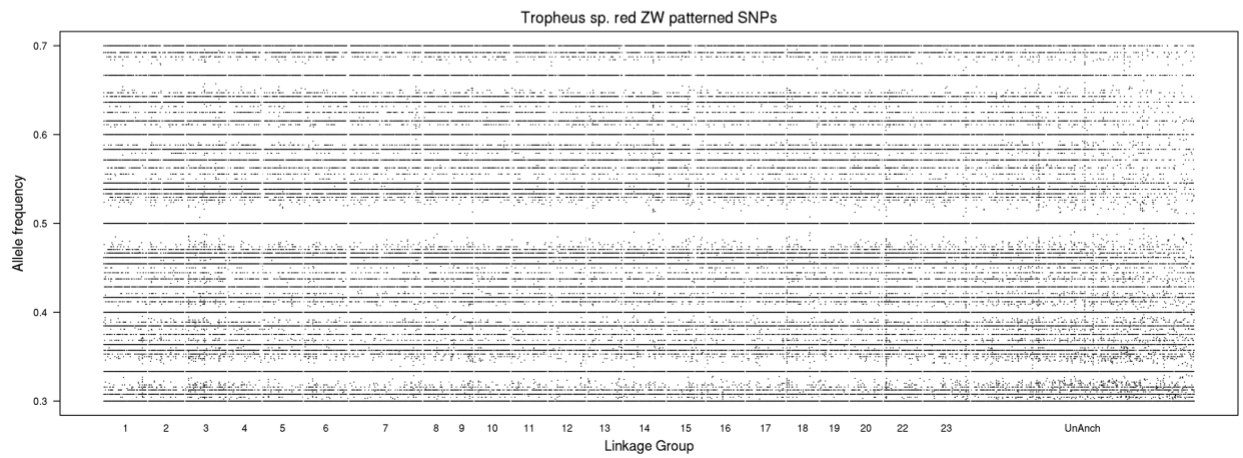

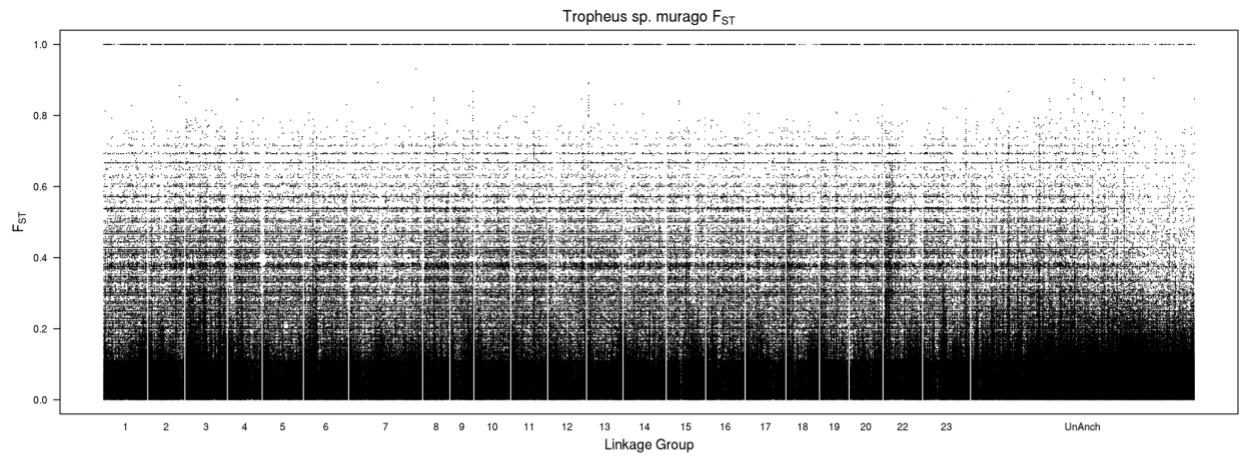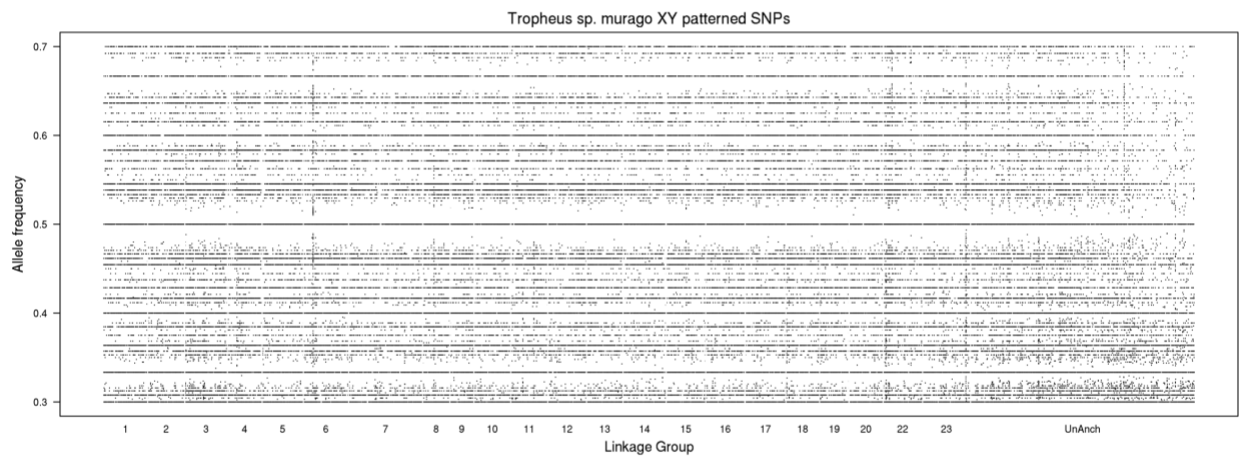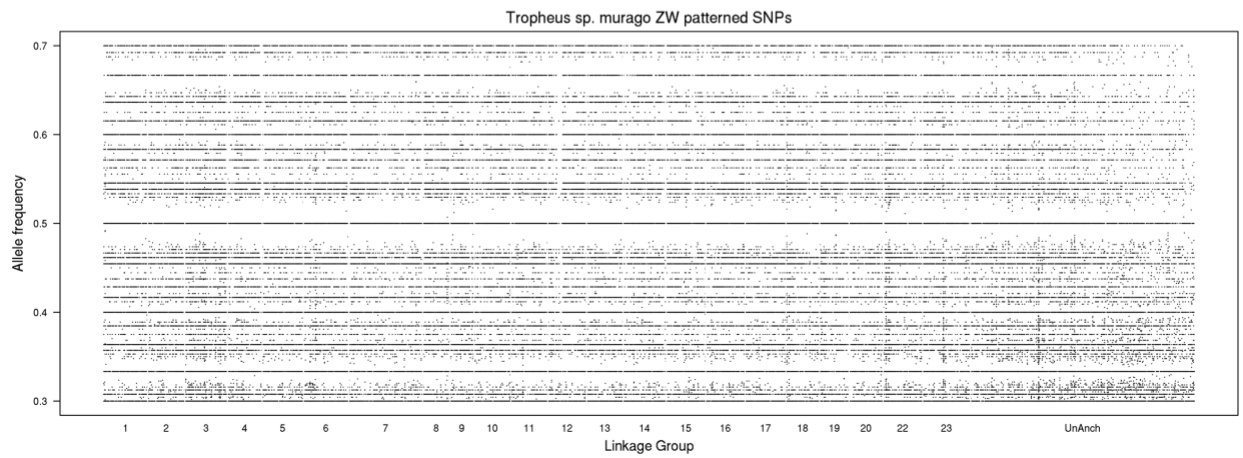

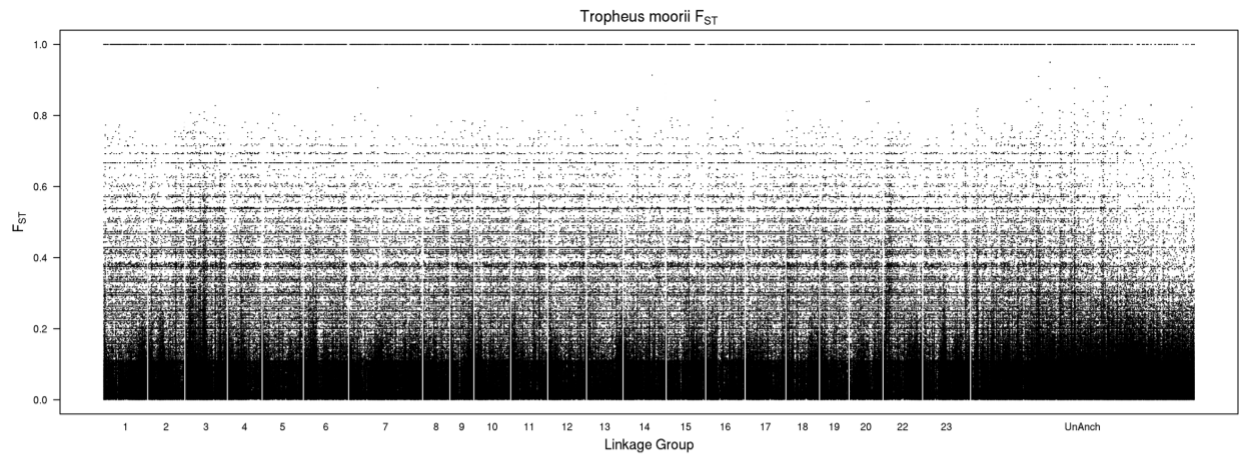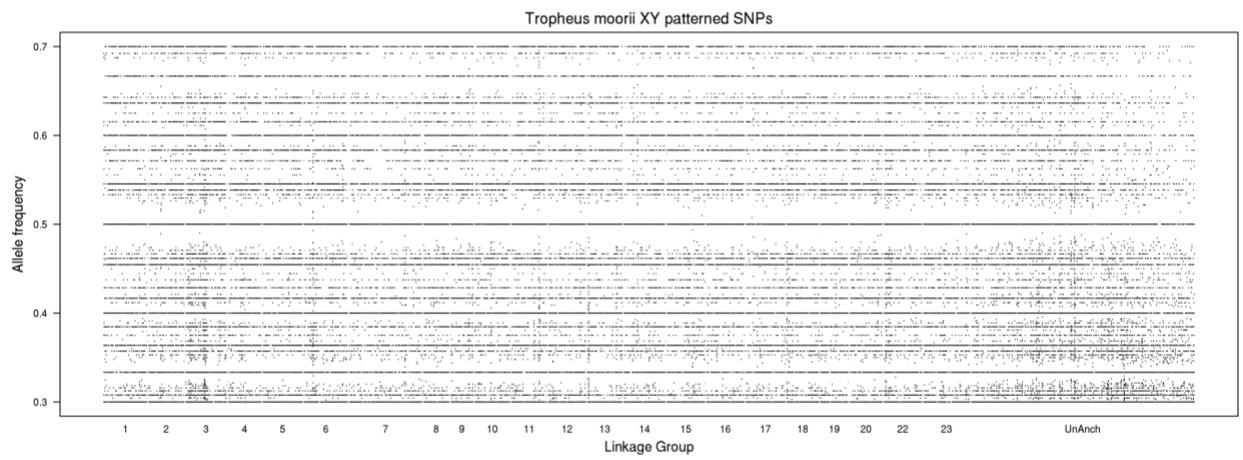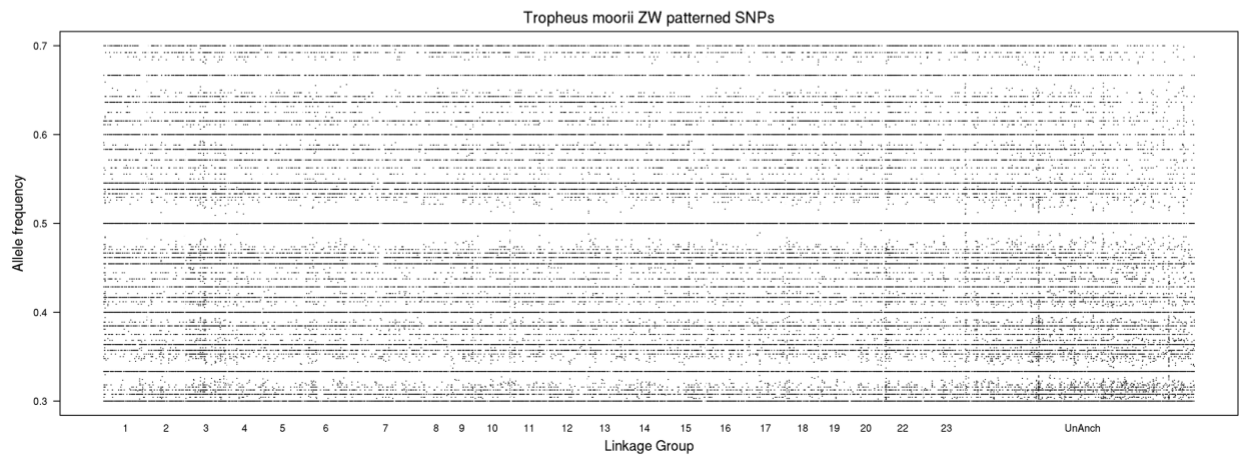

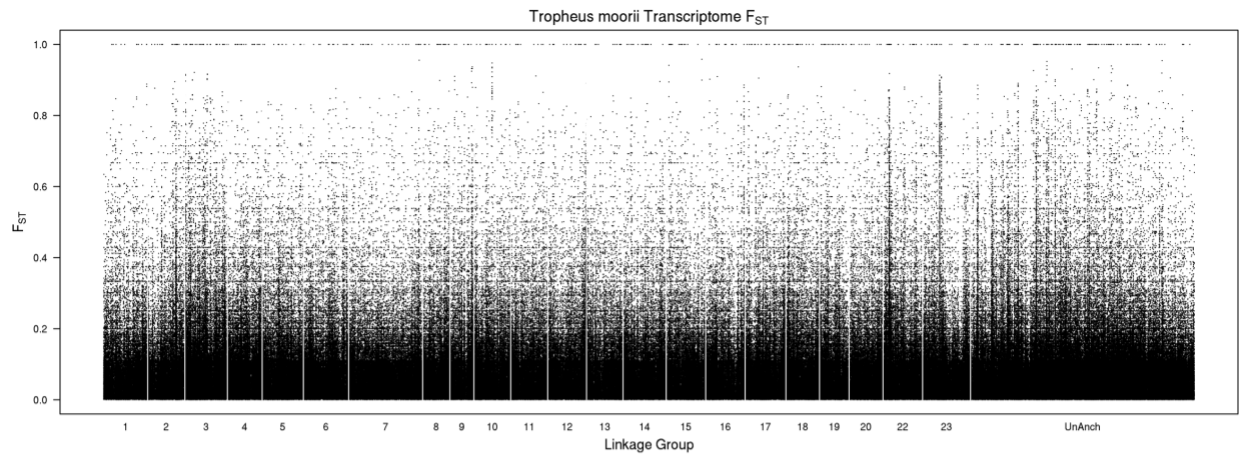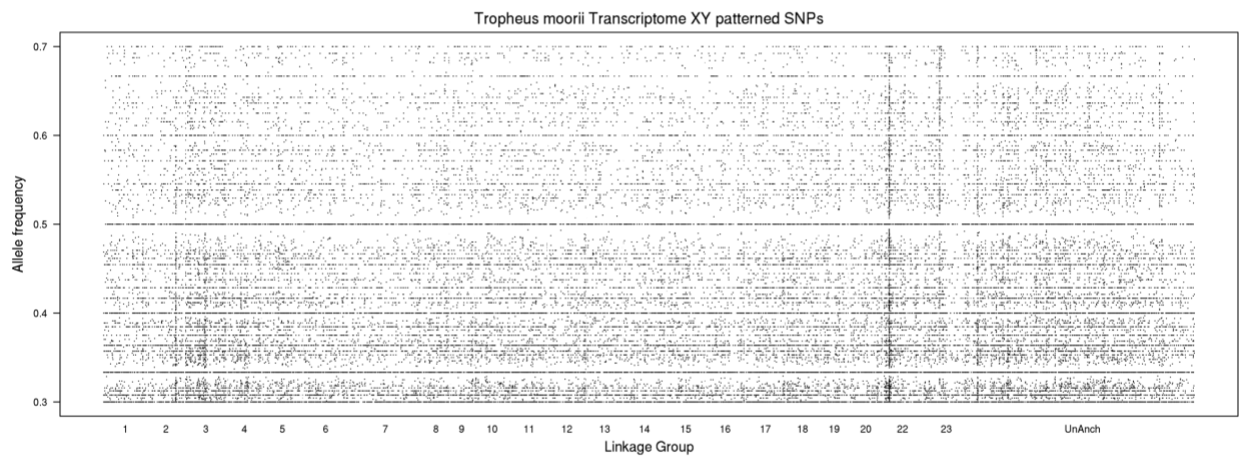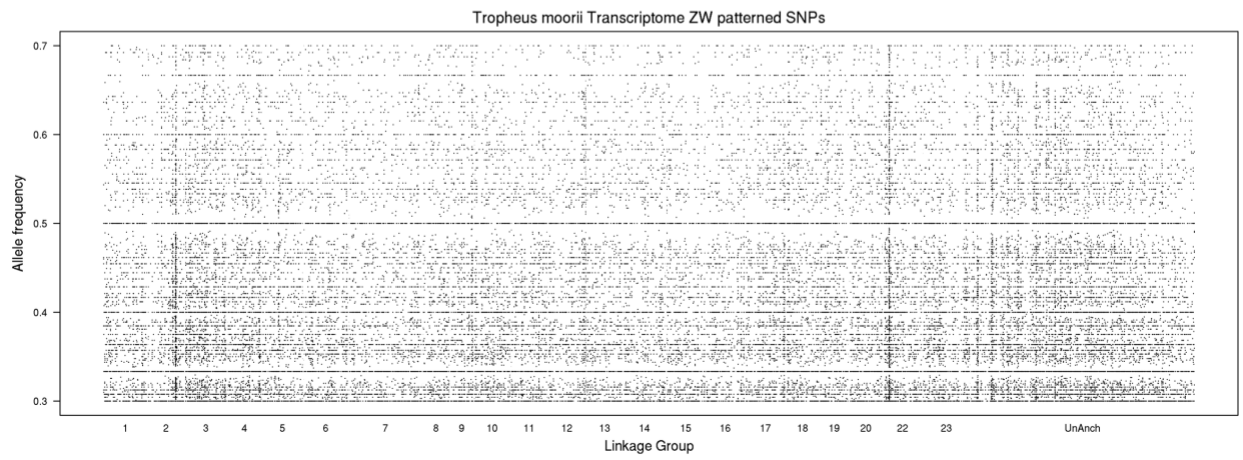



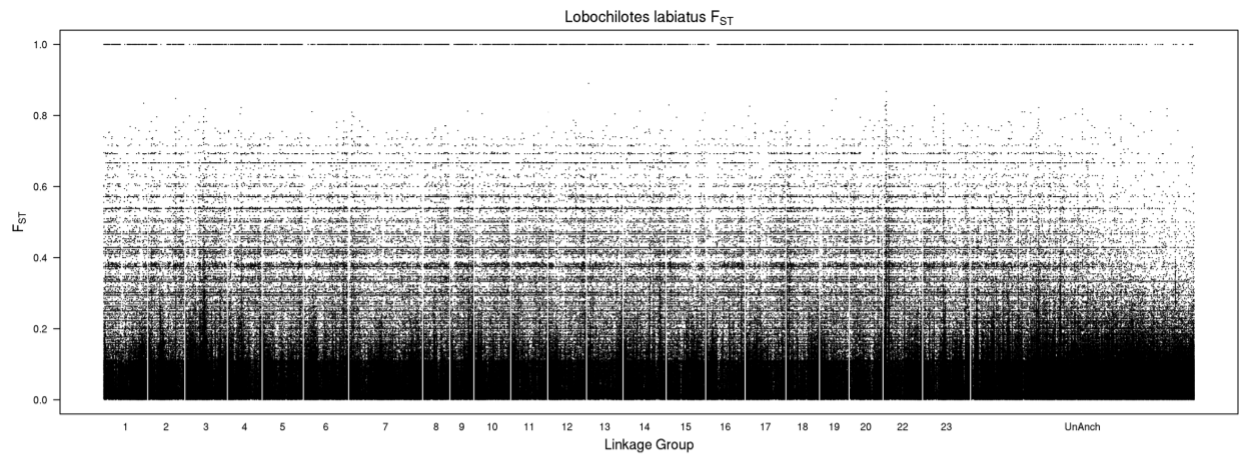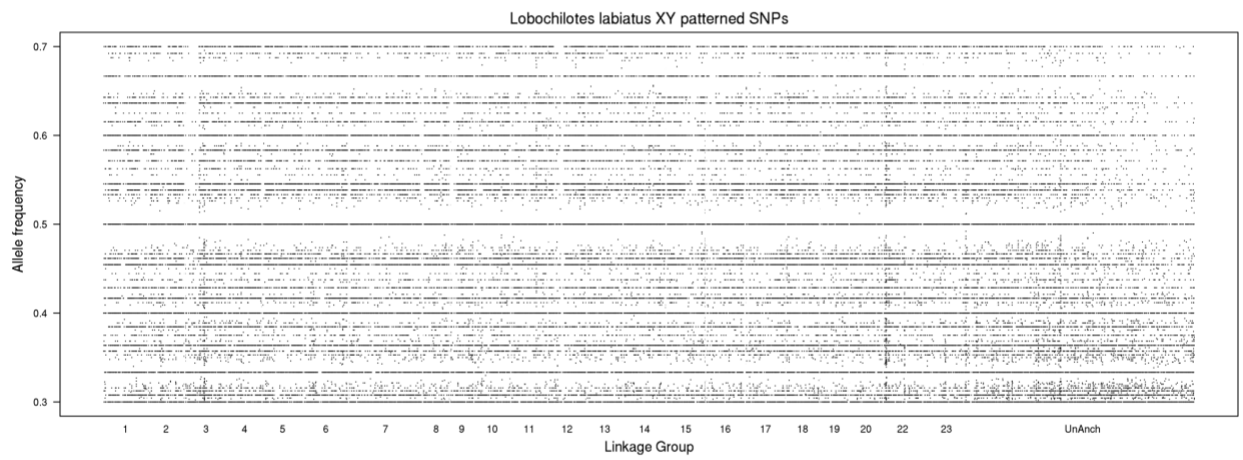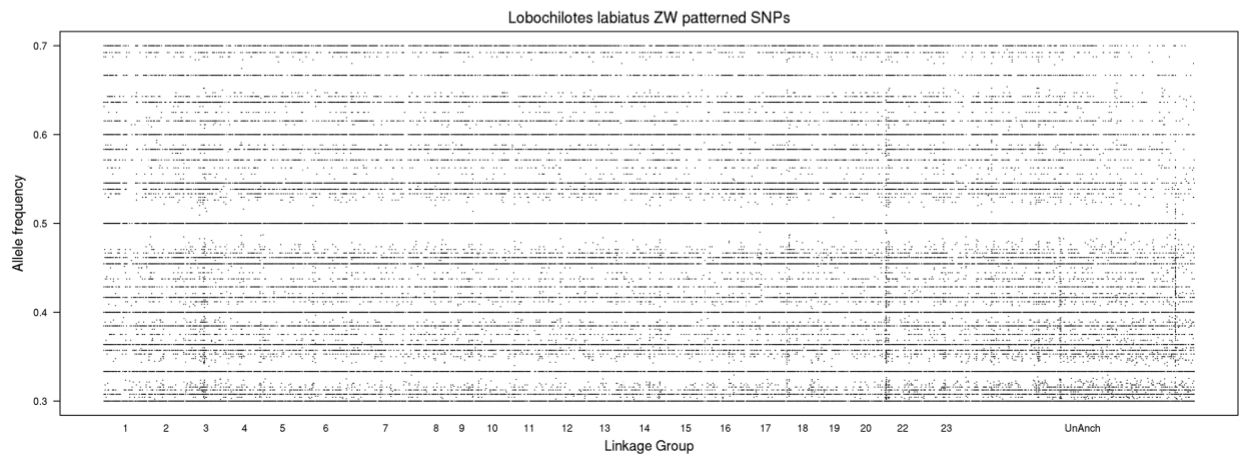

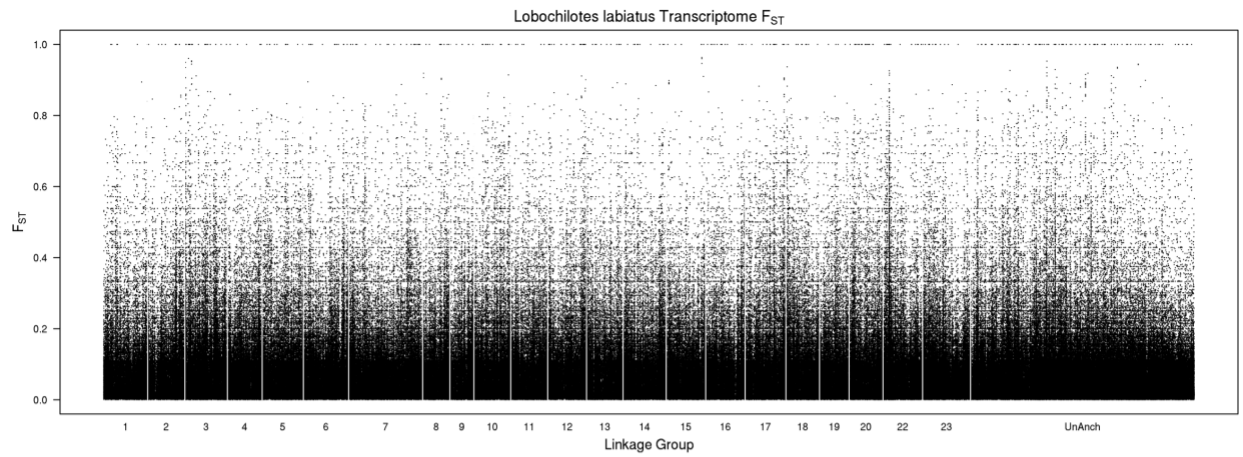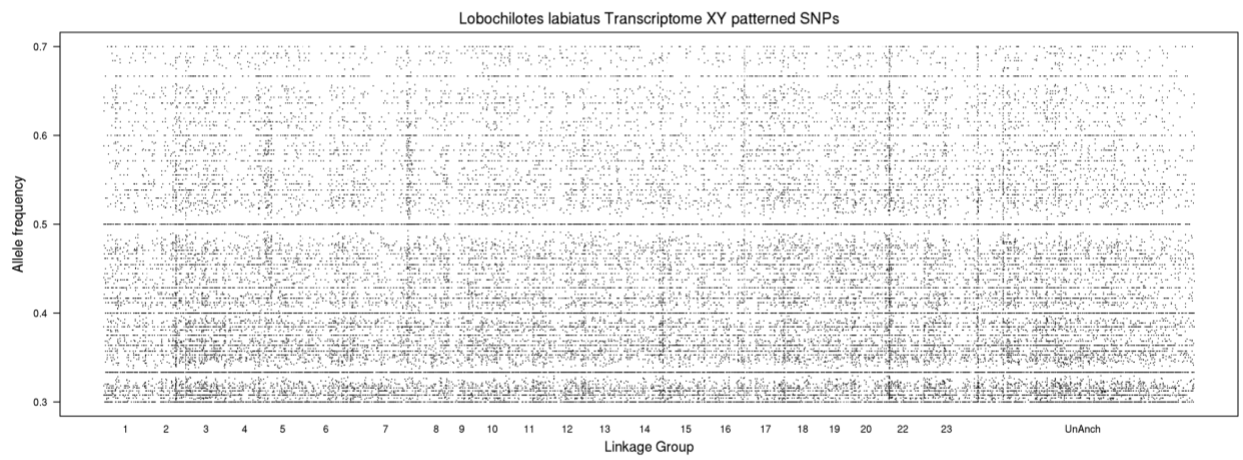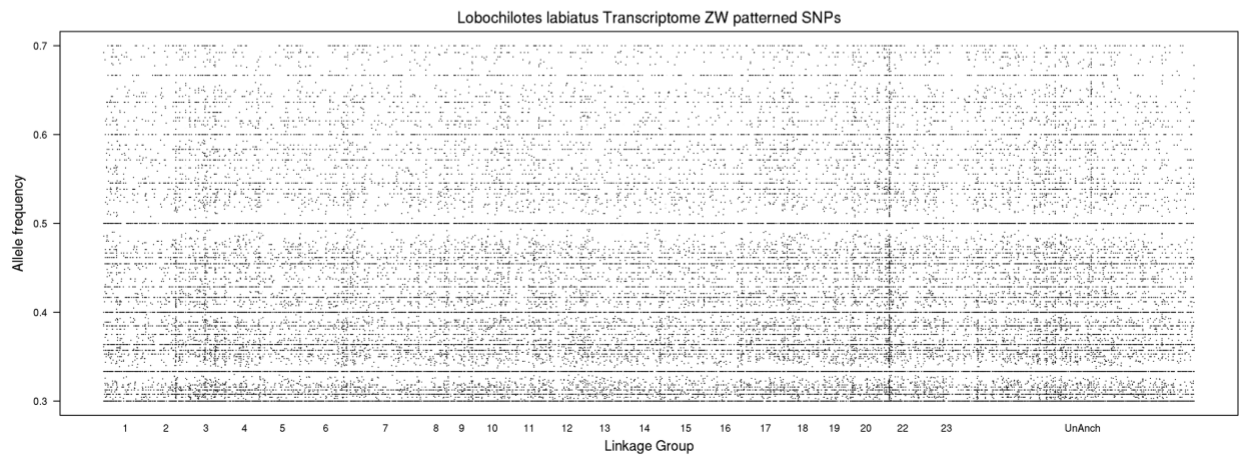

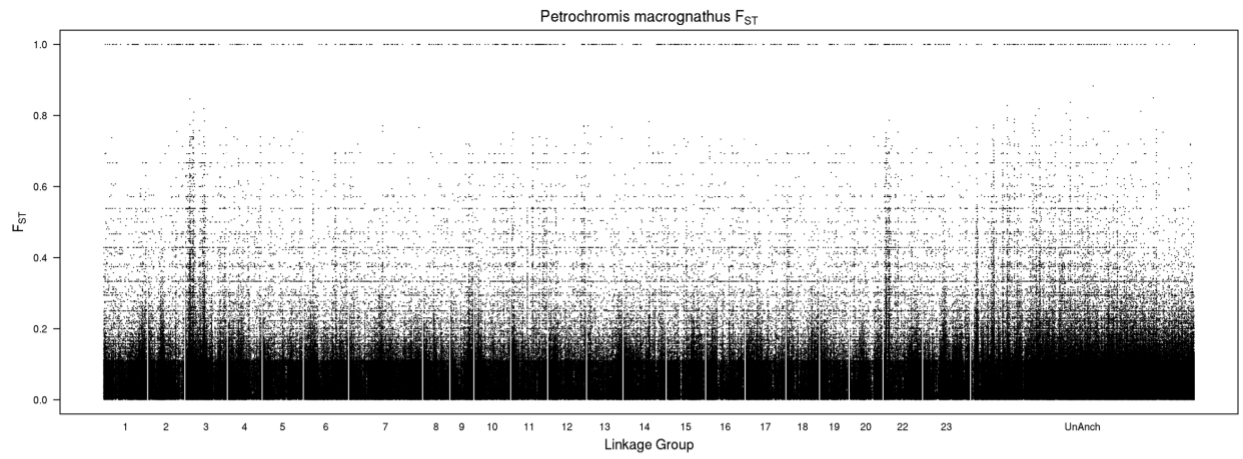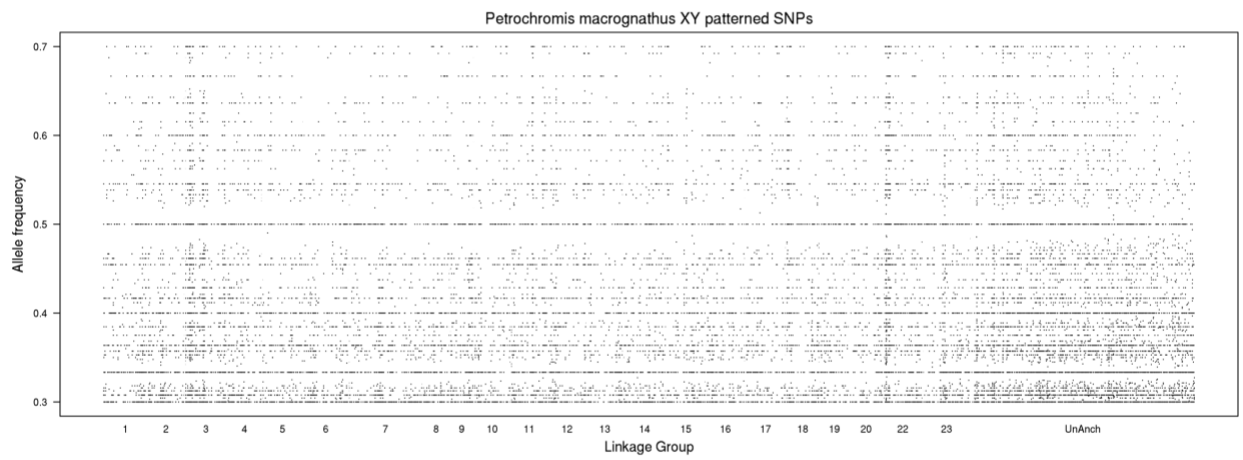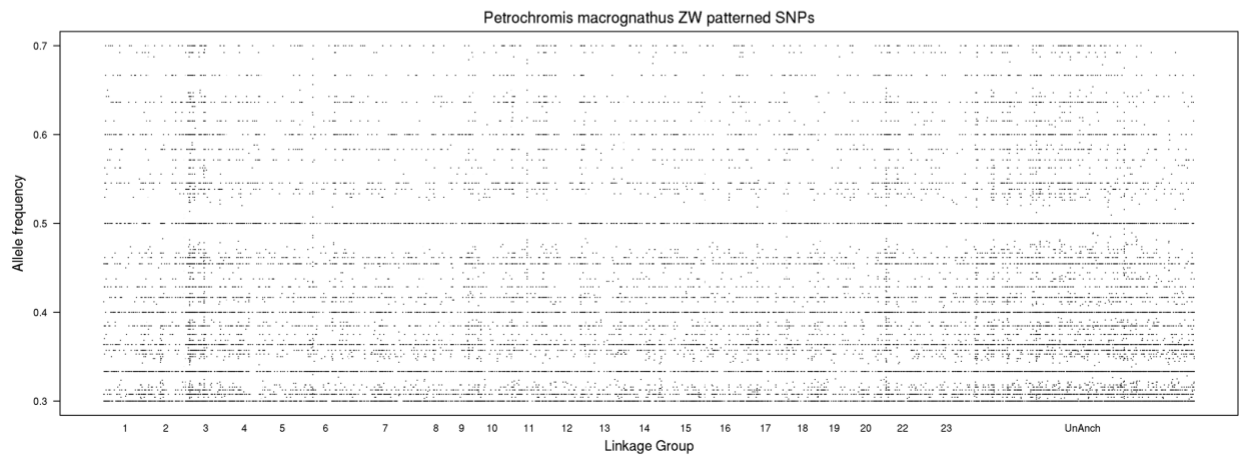

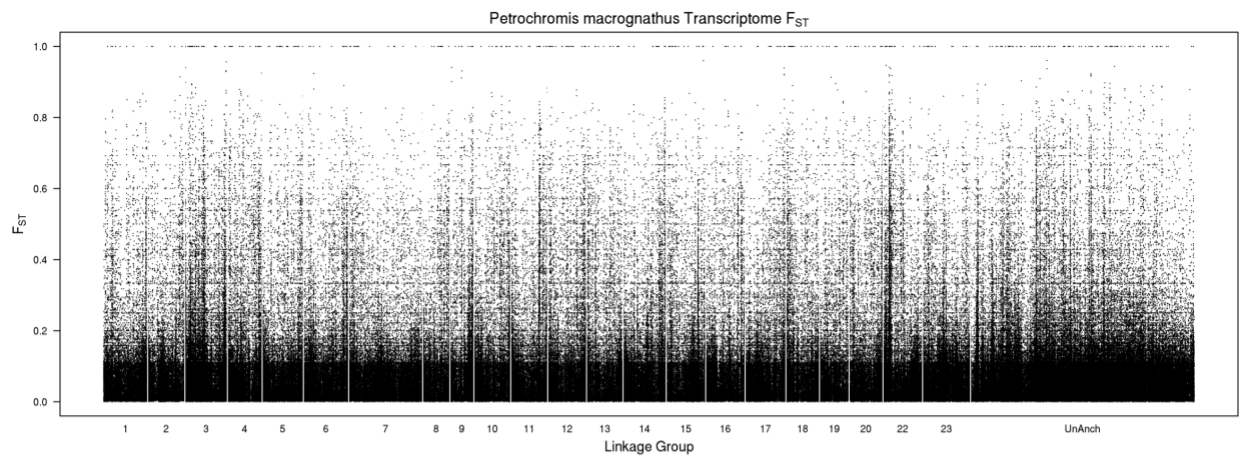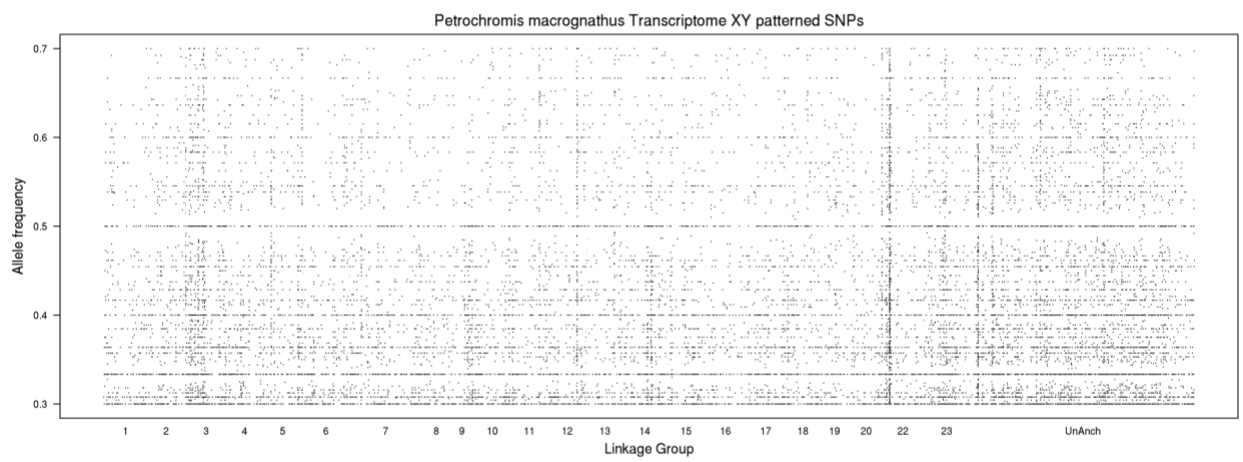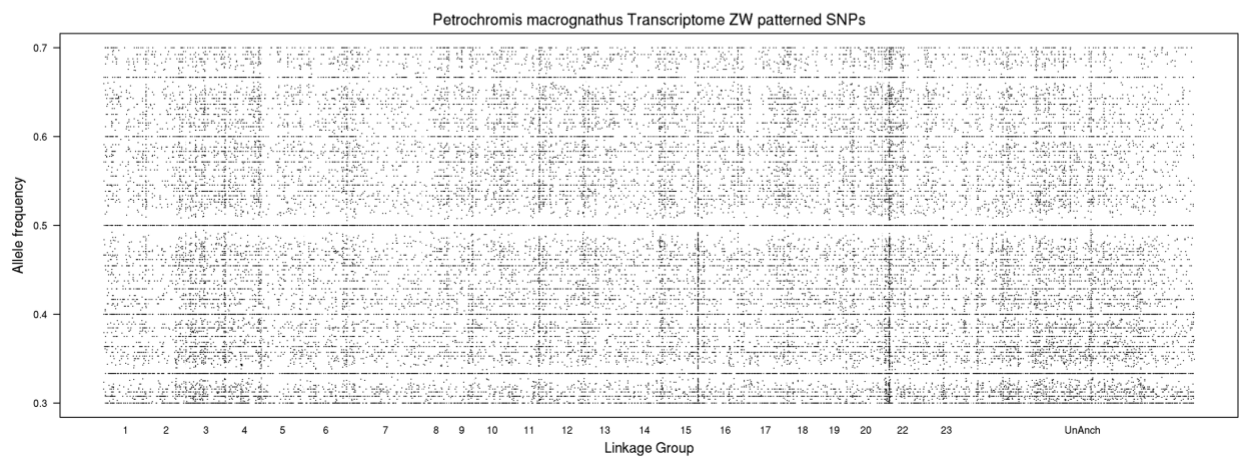

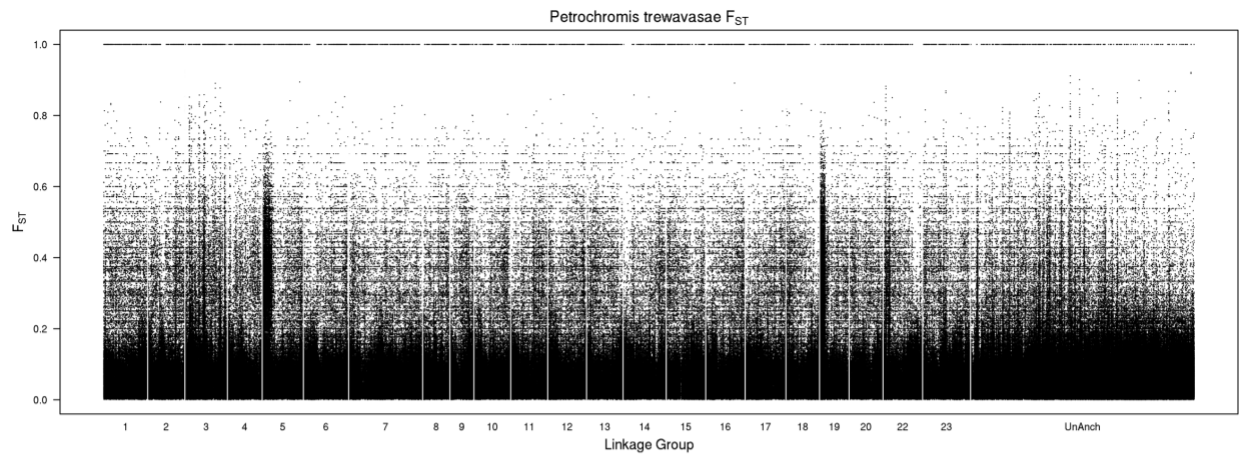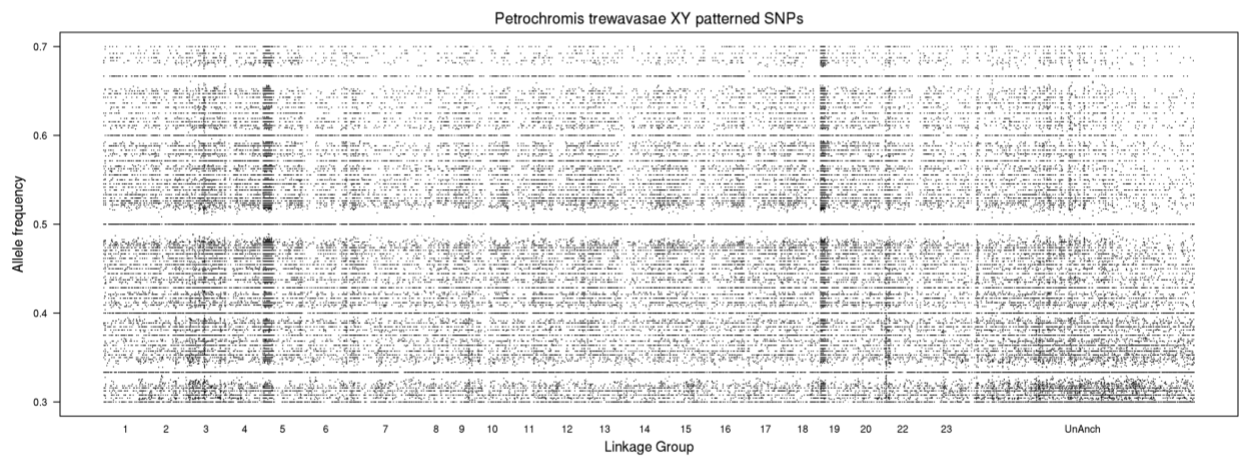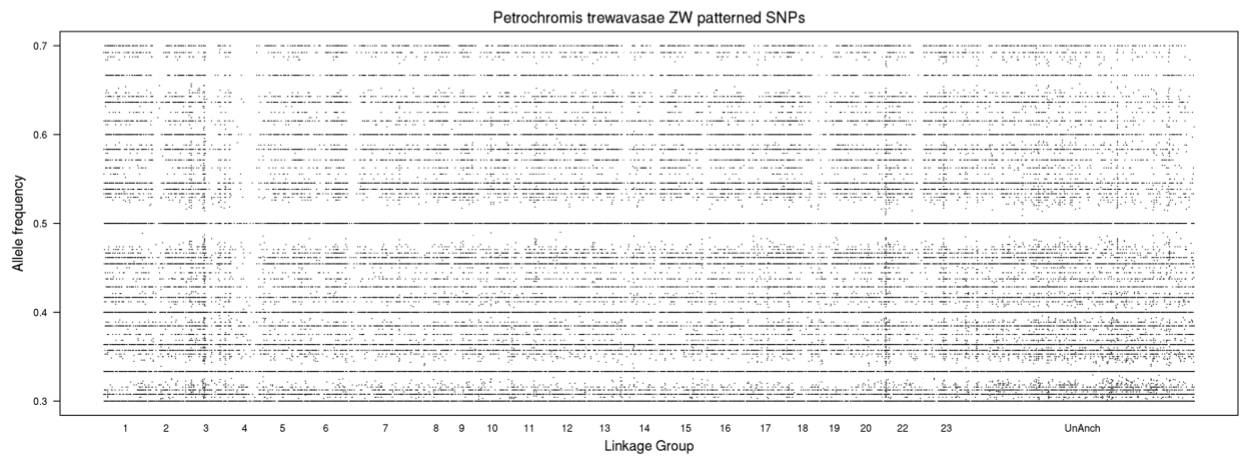

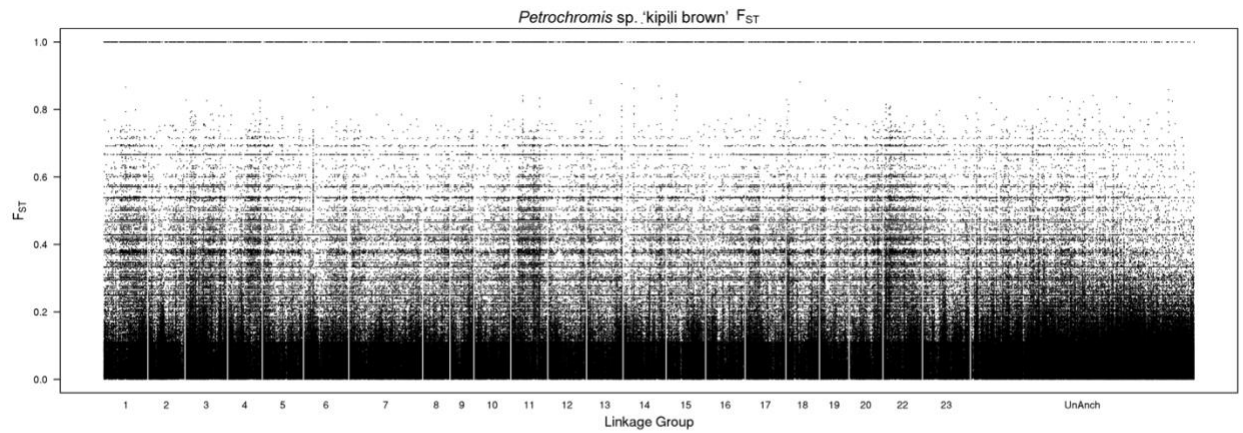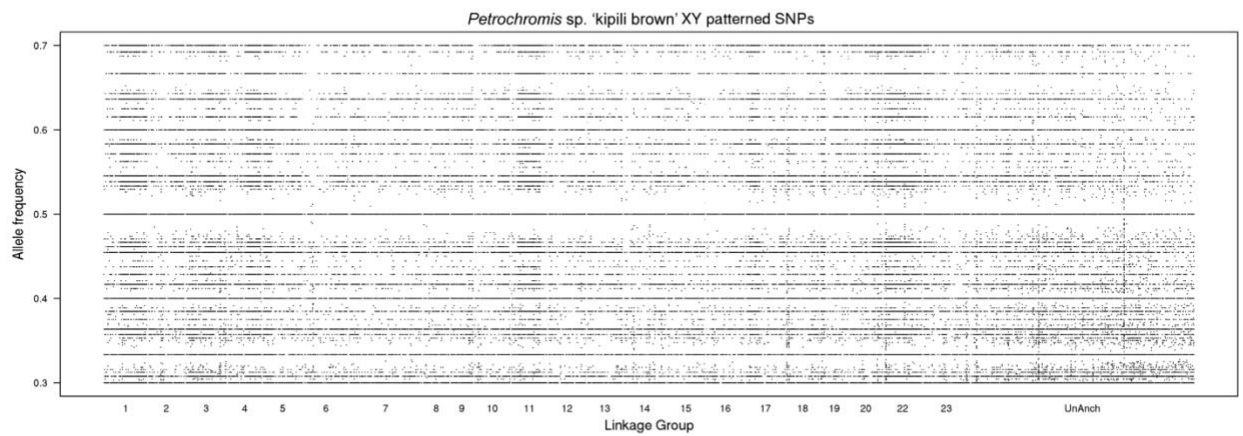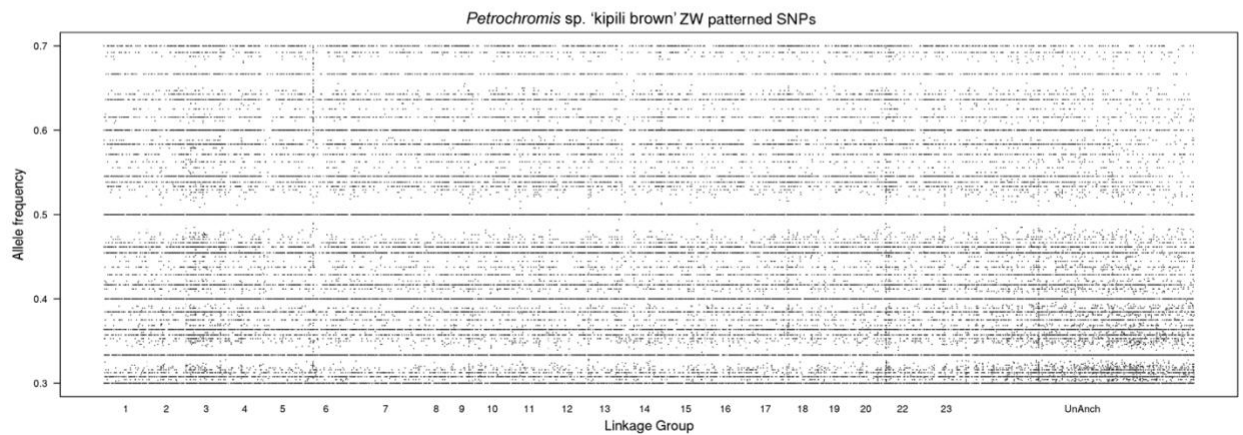

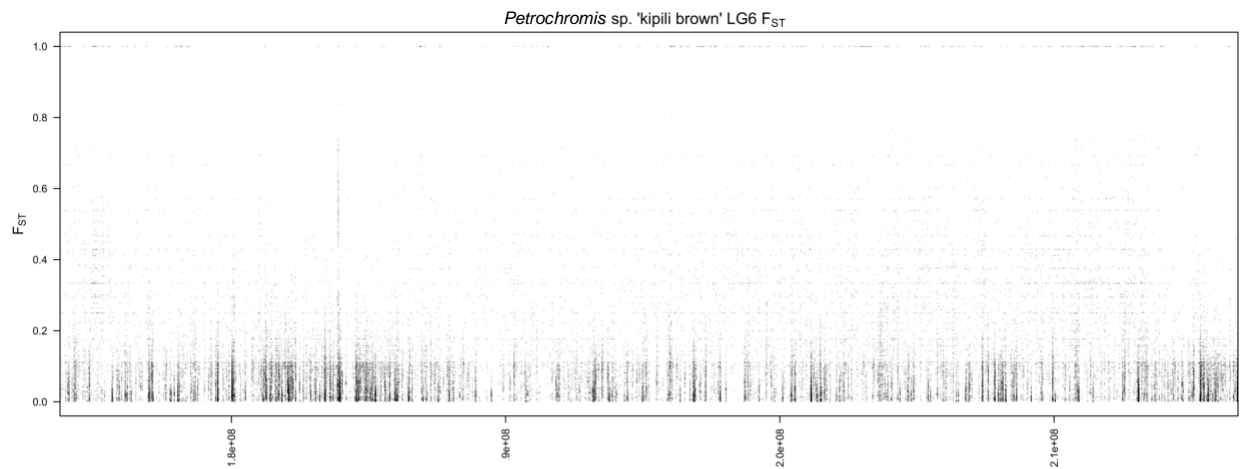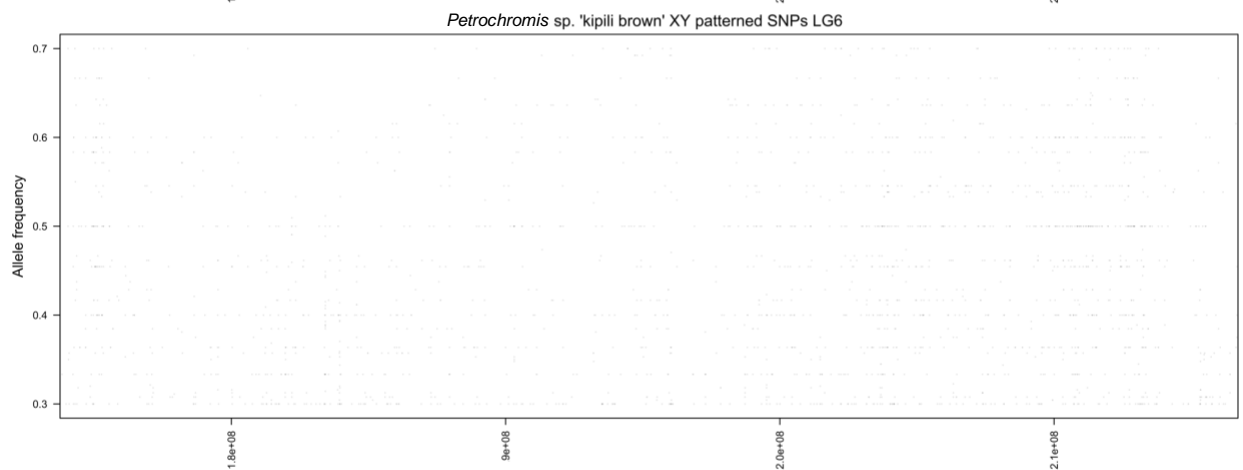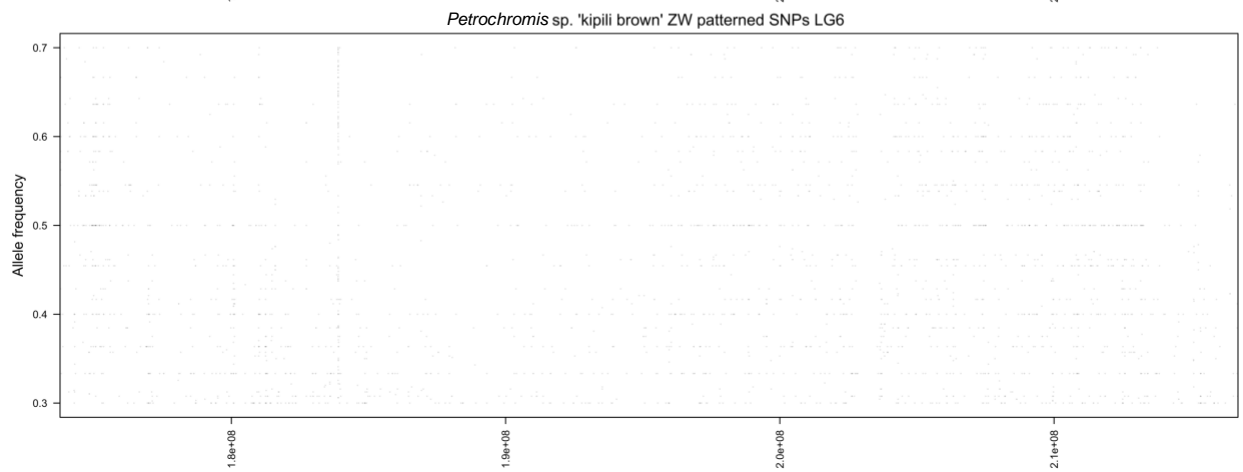

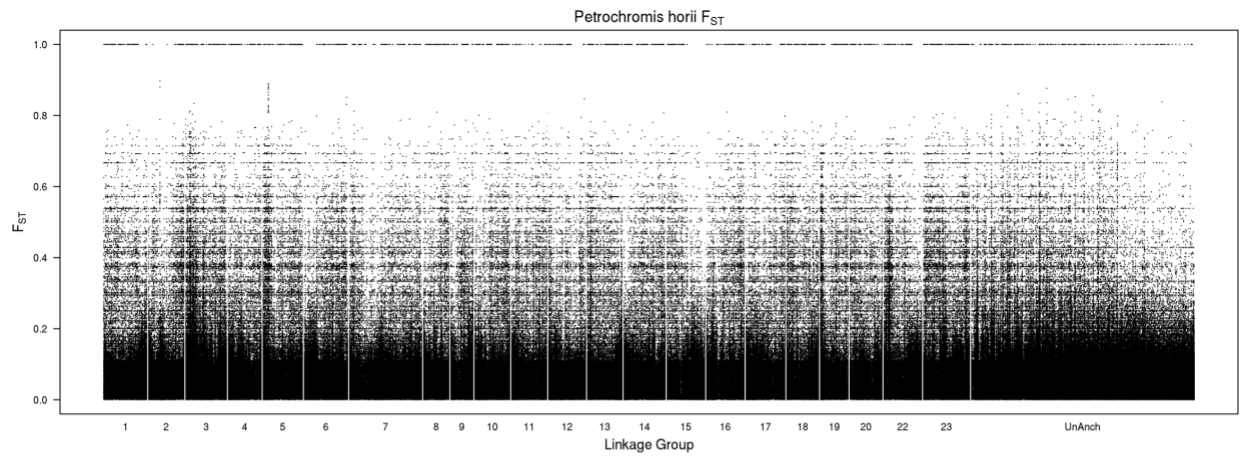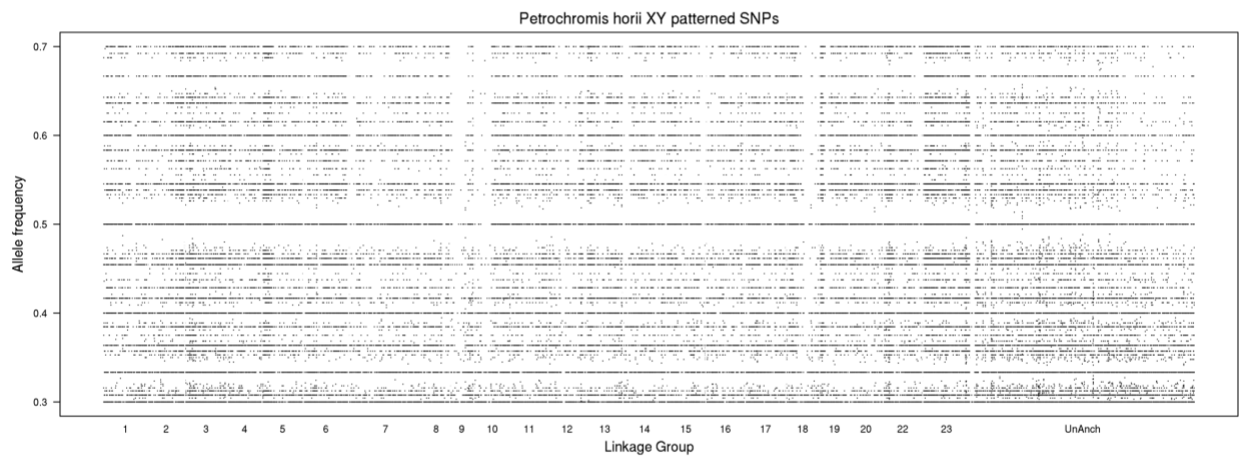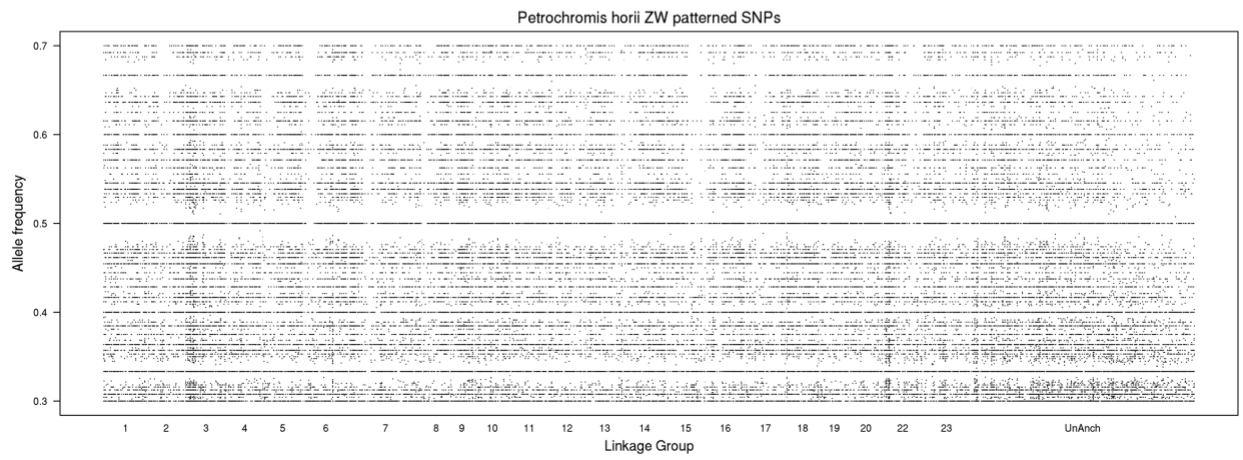



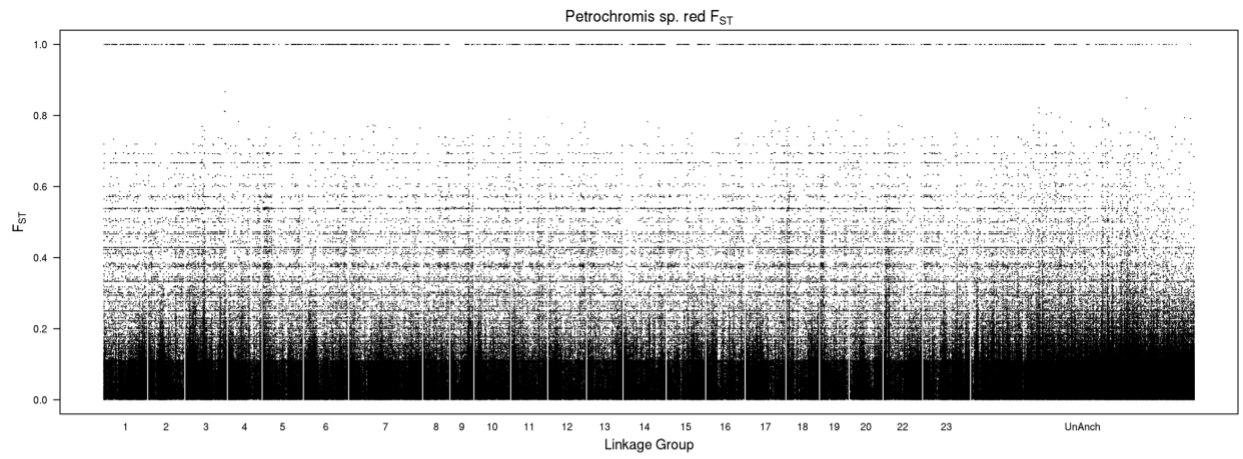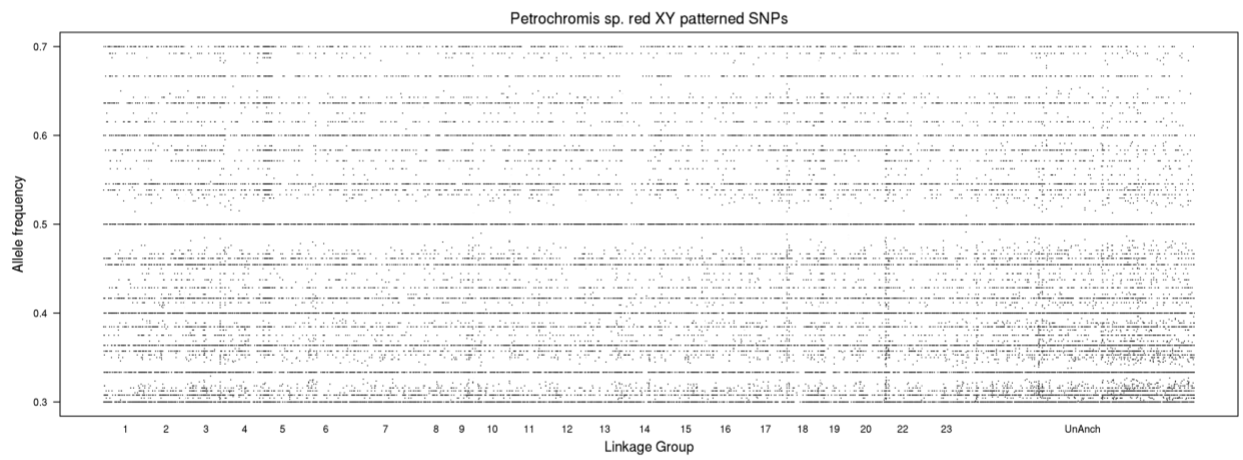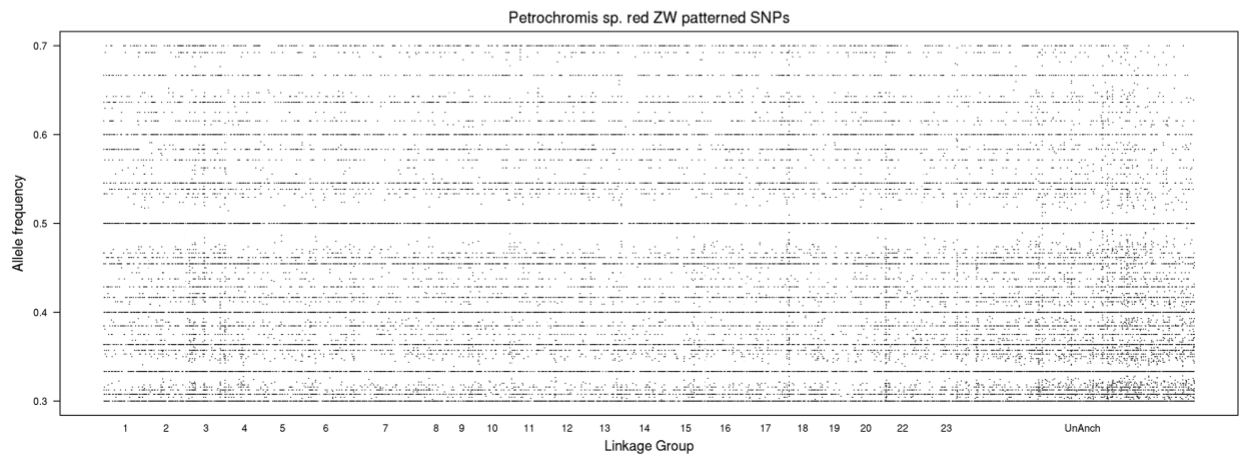

Petrochromis sp. moshi yellow  $F_{ST}$

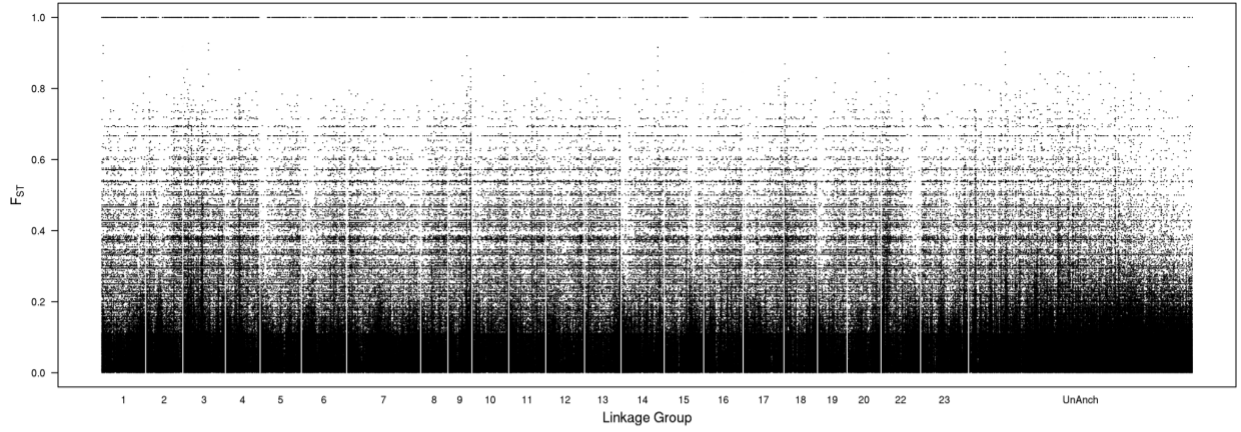

Petrochromis sp. moshi yellow XY patterned SNPs

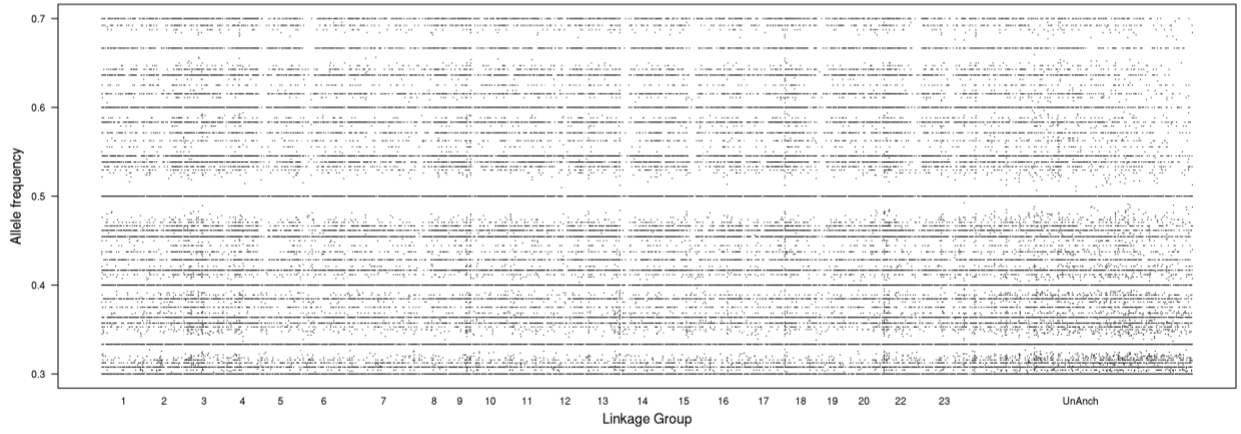

Petrochromis sp. moshi yellow ZW patterned SNPs

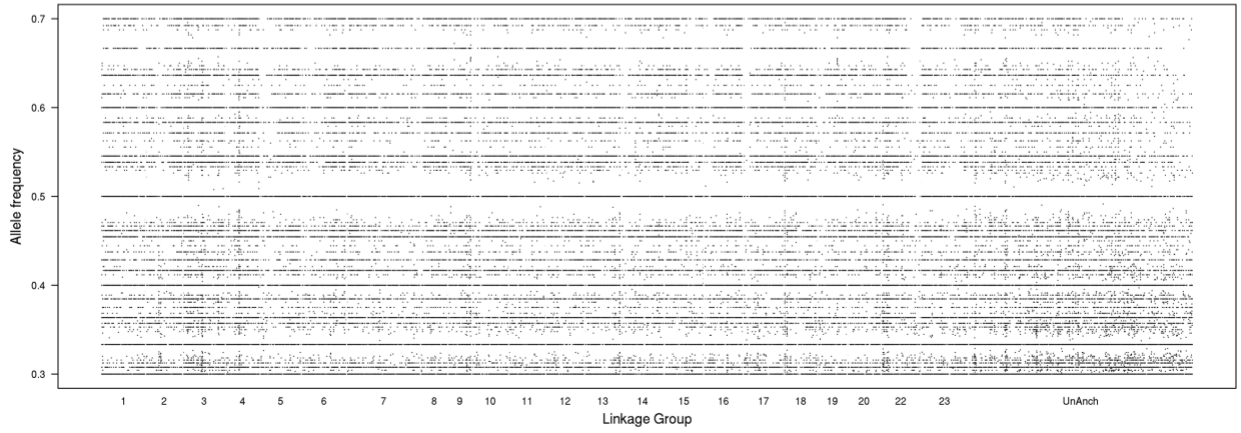

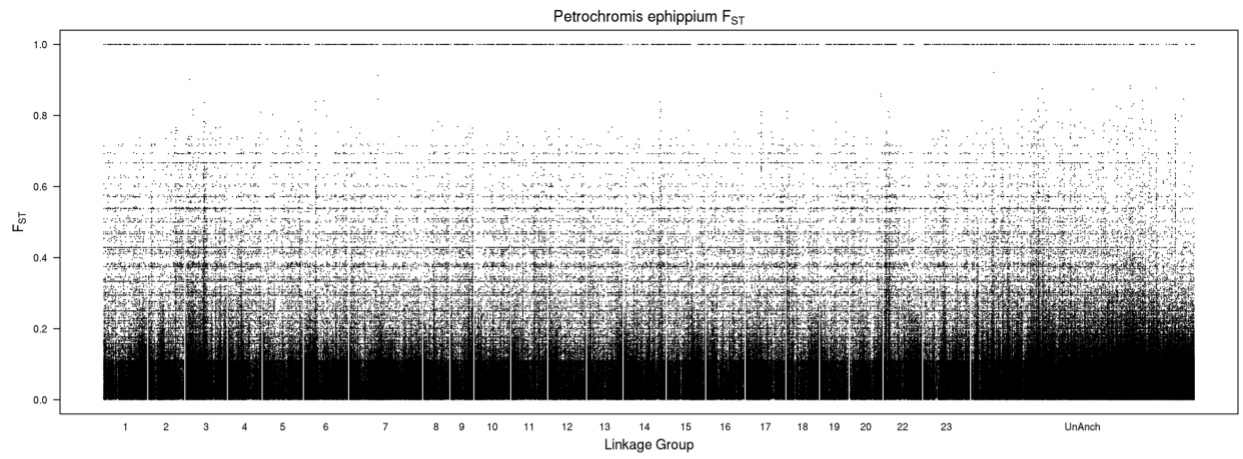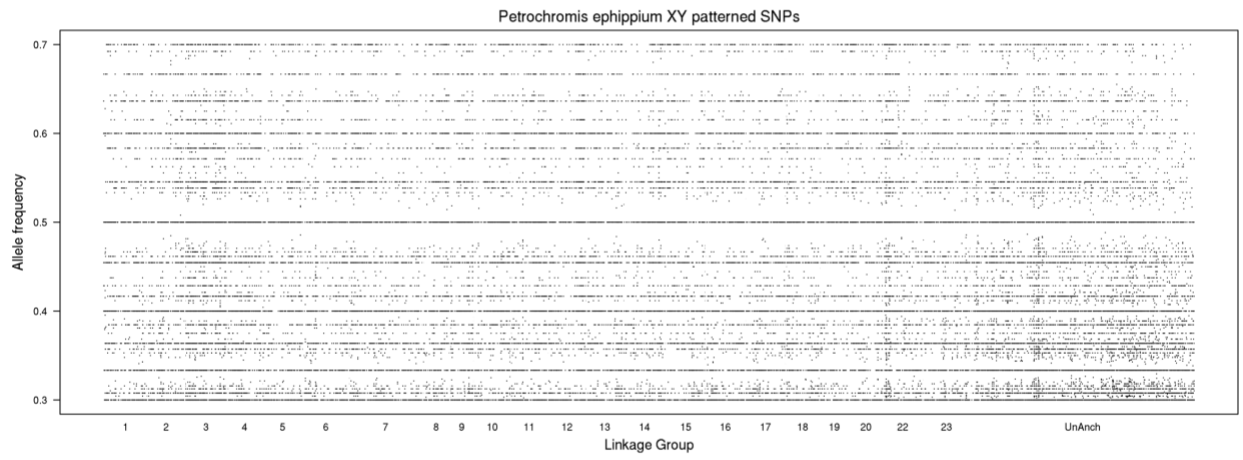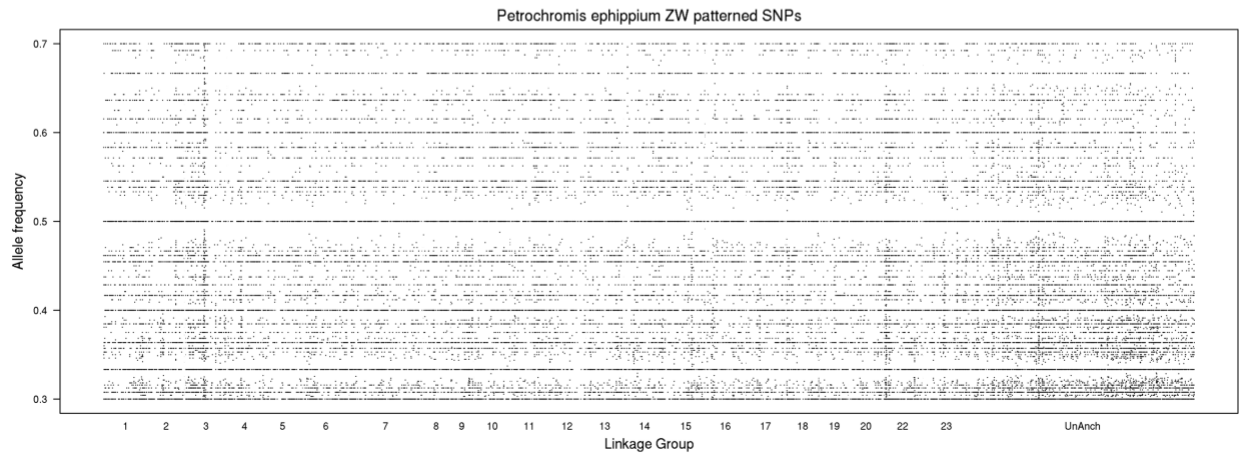

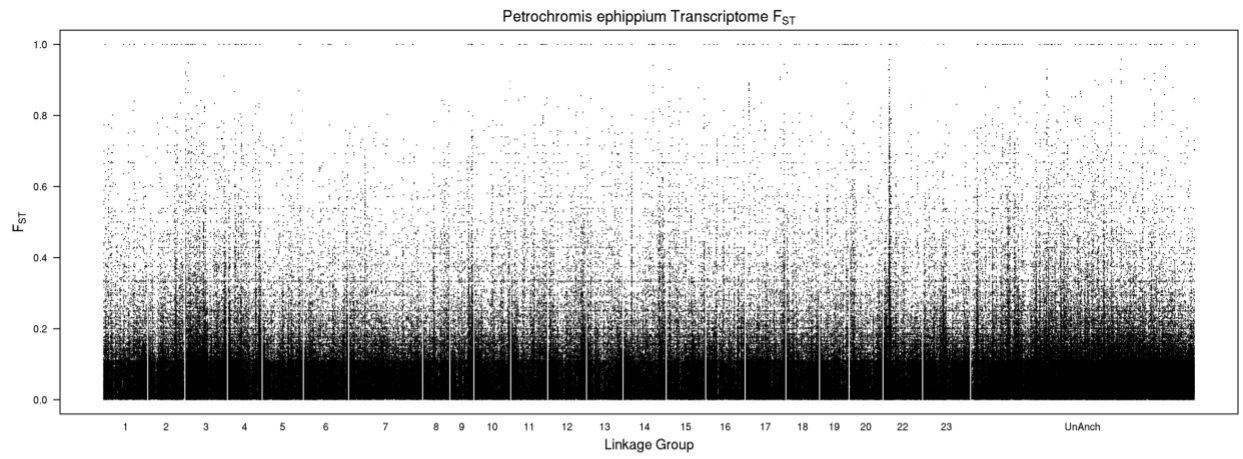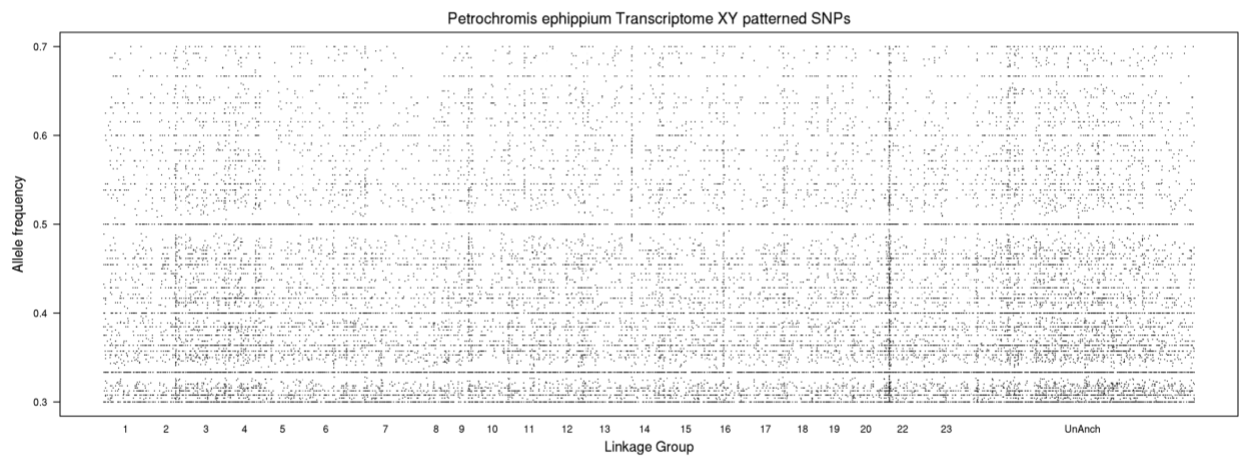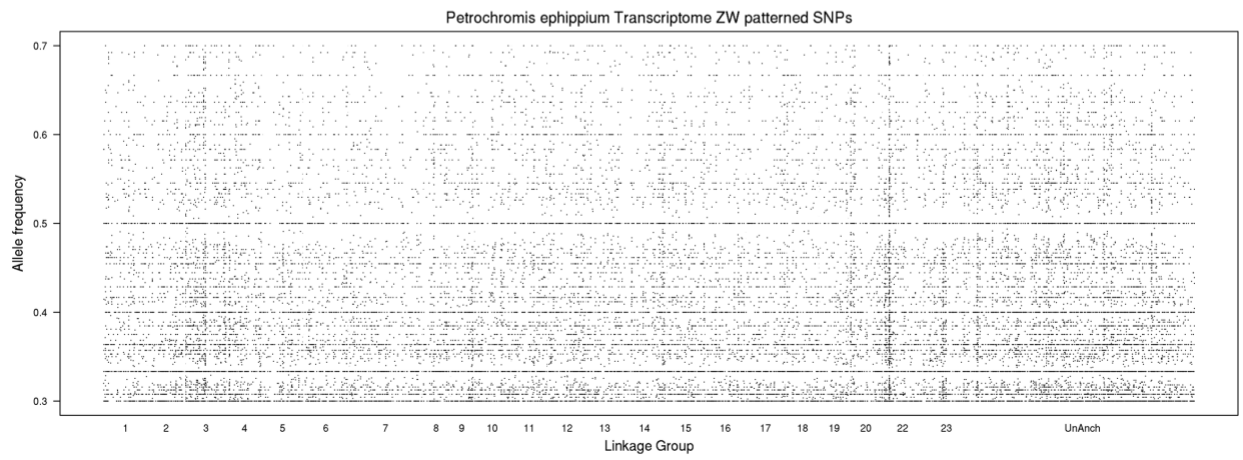

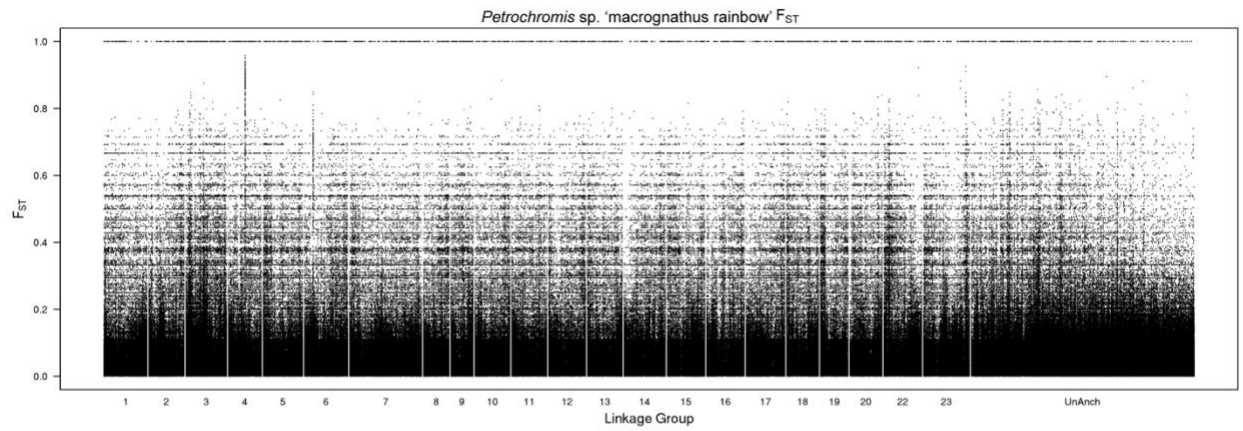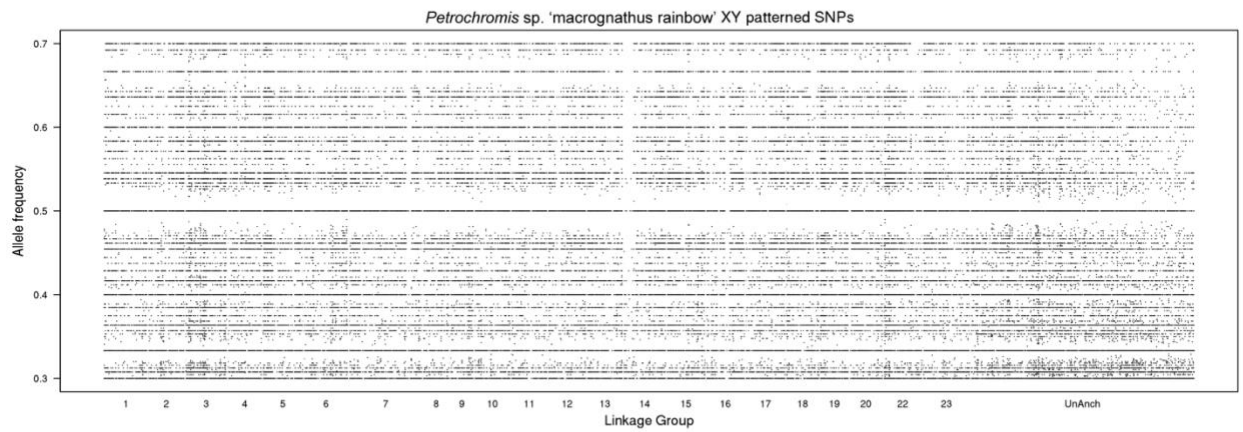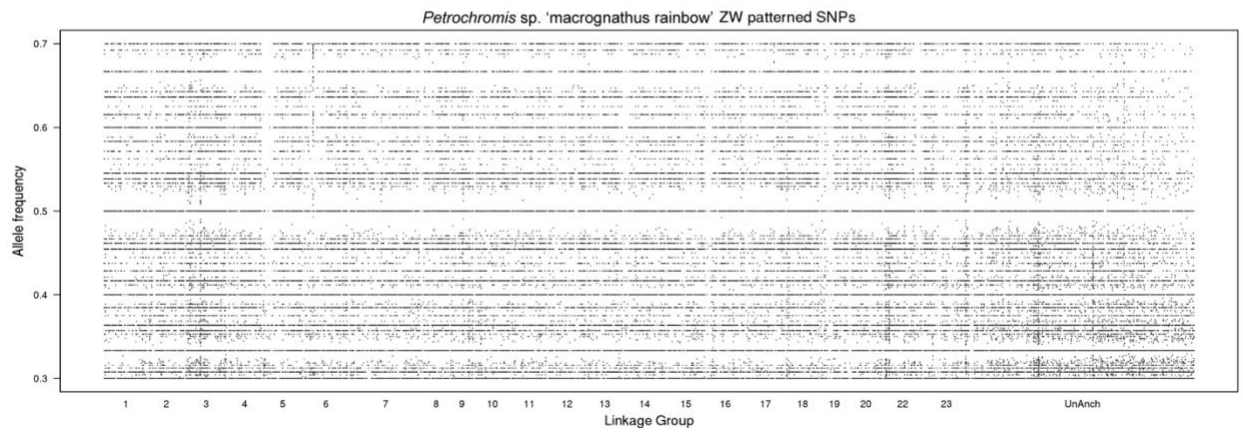

*Petrochromis* sp. 'macrognathus rainbow' LG6  $F_{ST}$

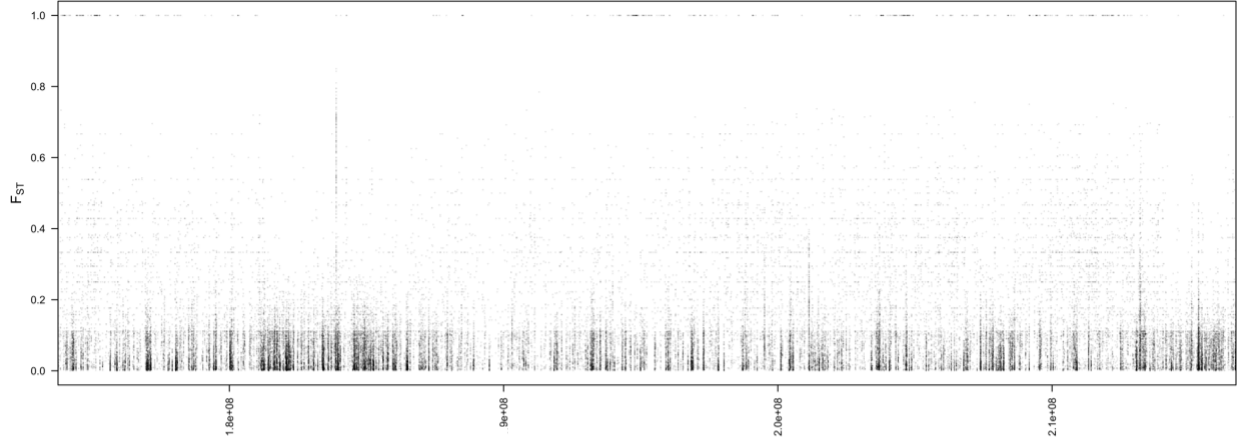

*Petrochromis* sp. 'macrognathus rainbow' XY patterned SNPs LG6

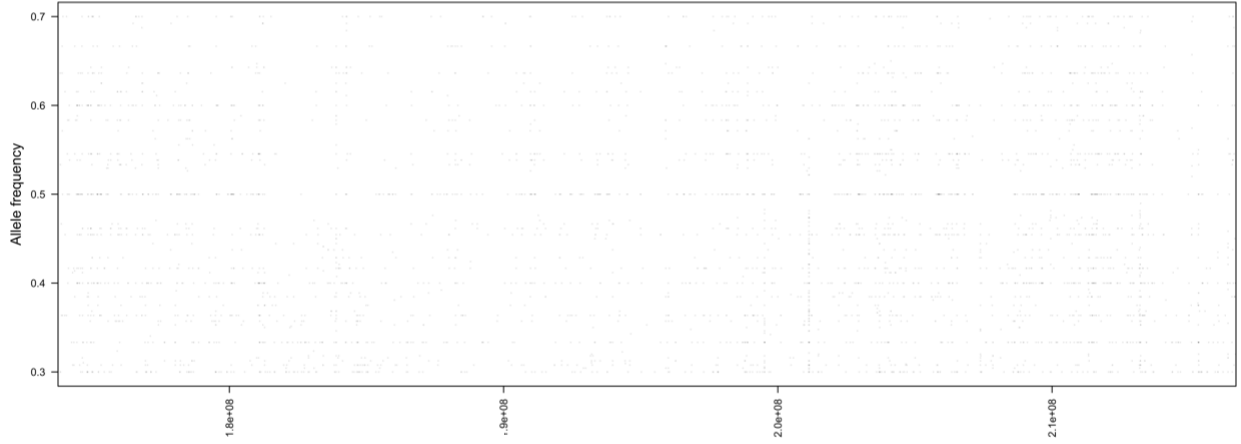

*Petrochromis* sp. 'macrognathus rainbow' ZW patterned SNPs LG6

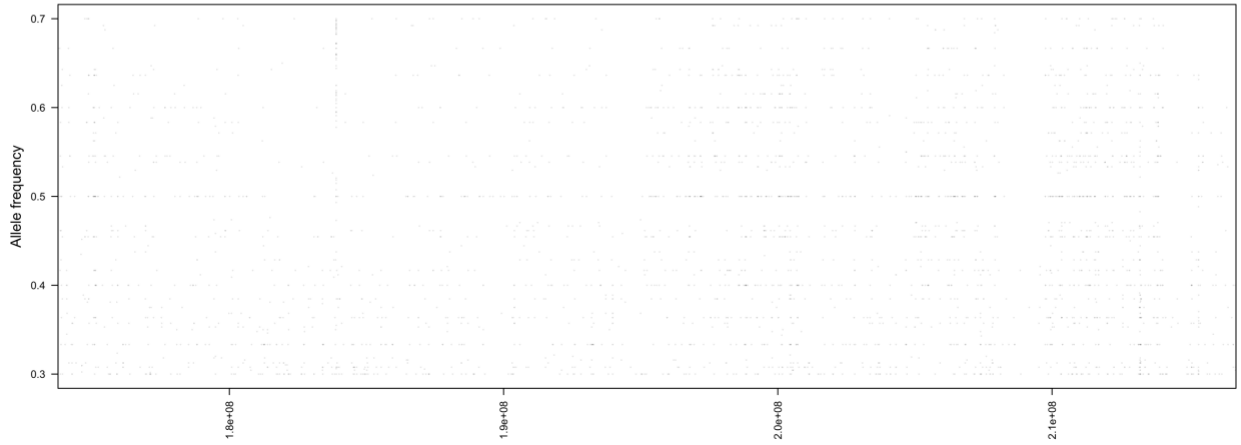

Petrochromis sp. kazumbae  $F_{ST}$

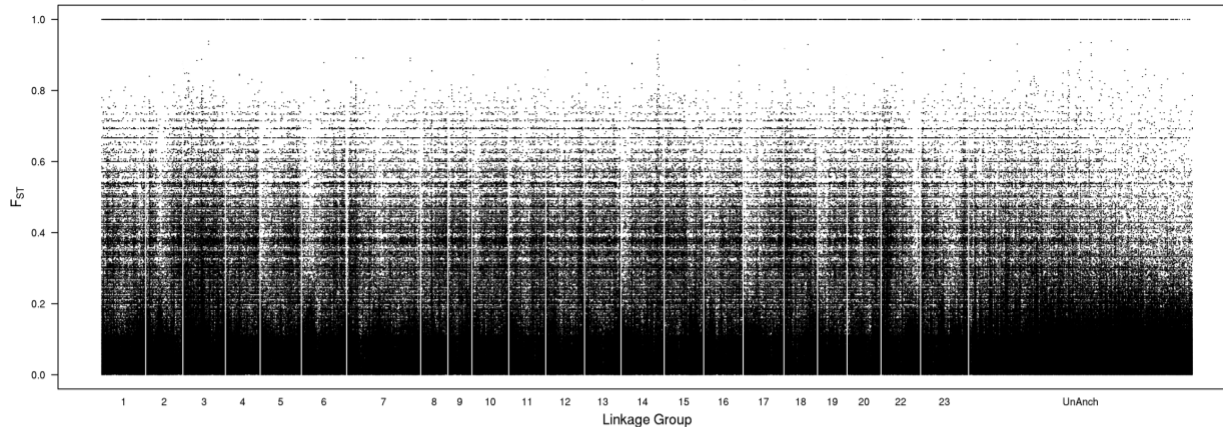

Petrochromis sp. kazumbae XY patterned SNPs

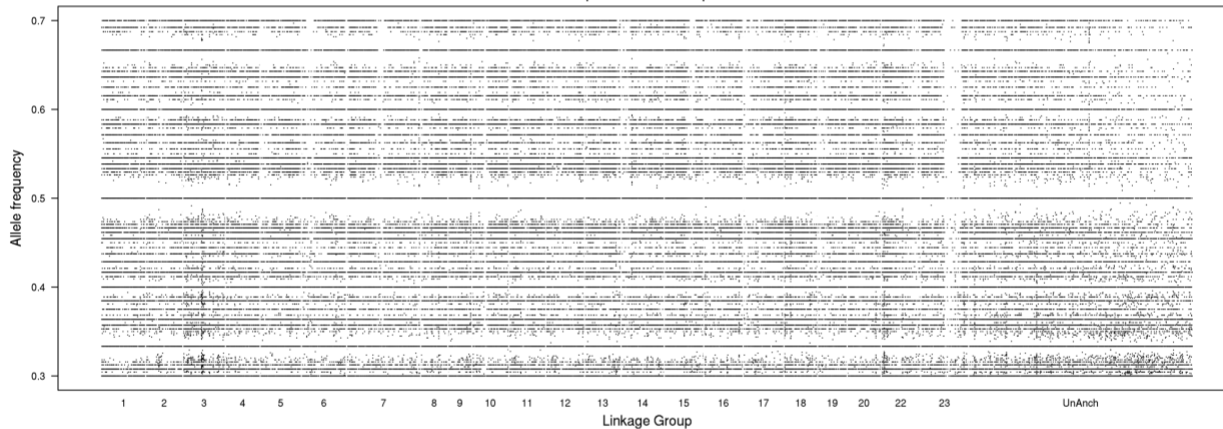

Petrochromis sp. kazumbae ZW patterned SNPs

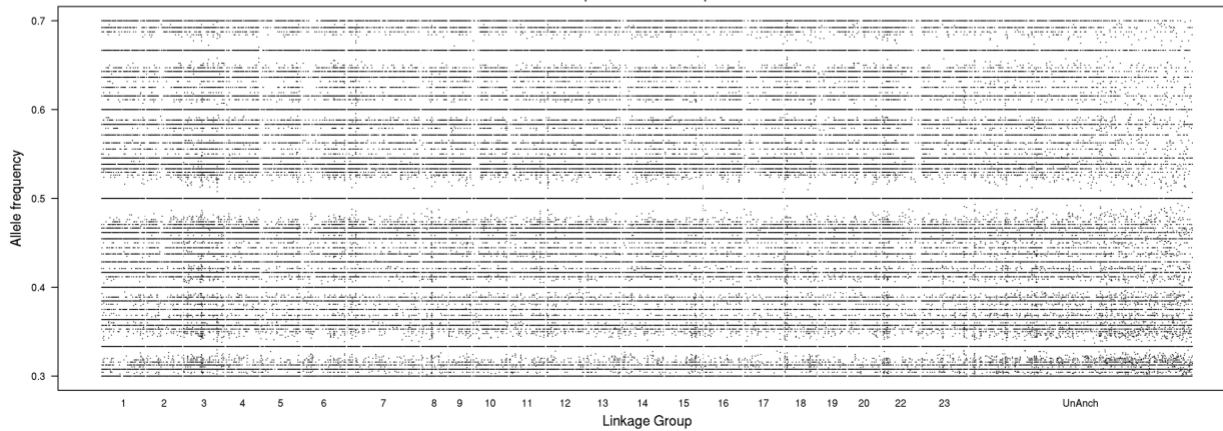

Petrochromis sp. polyodon texas  $F_{ST}$

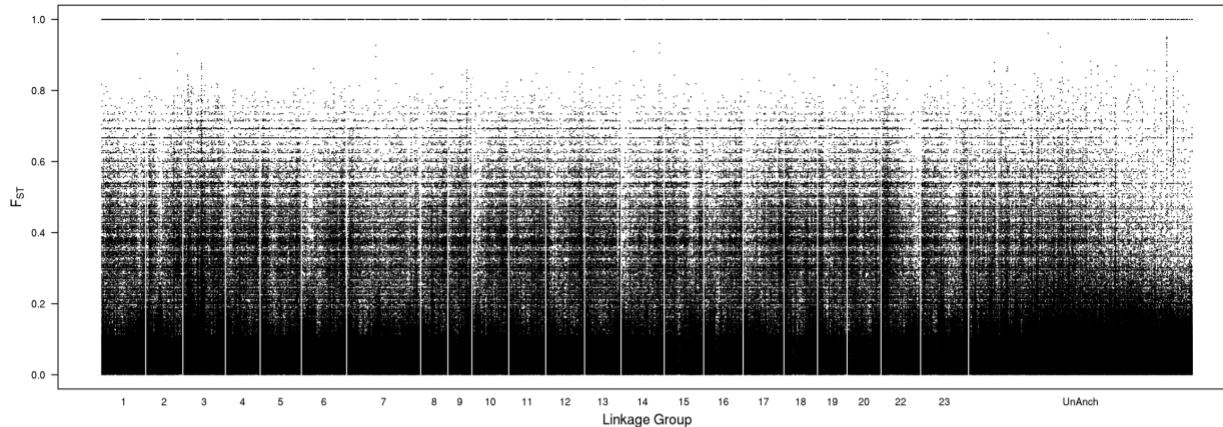

Petrochromis sp. polyodon texas XY patterned SNPs

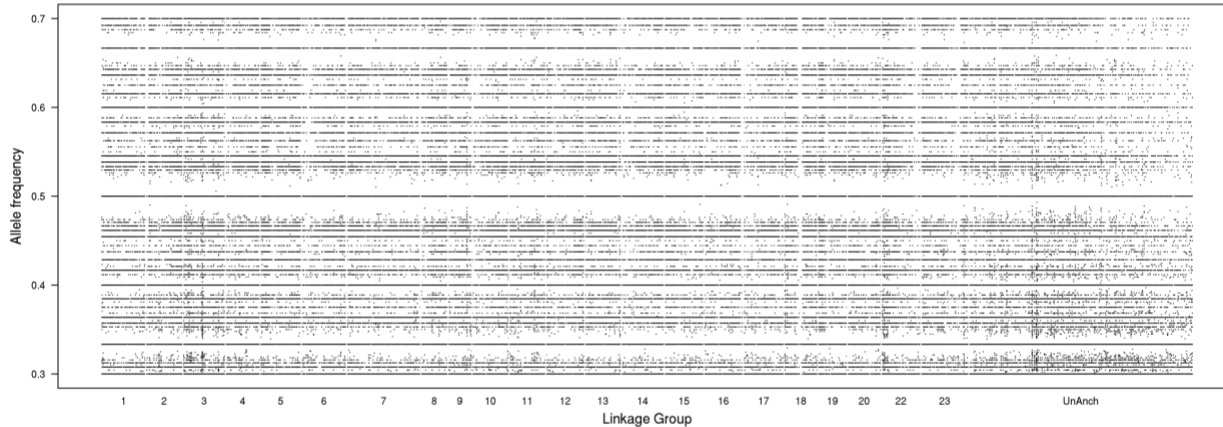

Petrochromis sp. polyodon texas ZW patterned SNPs

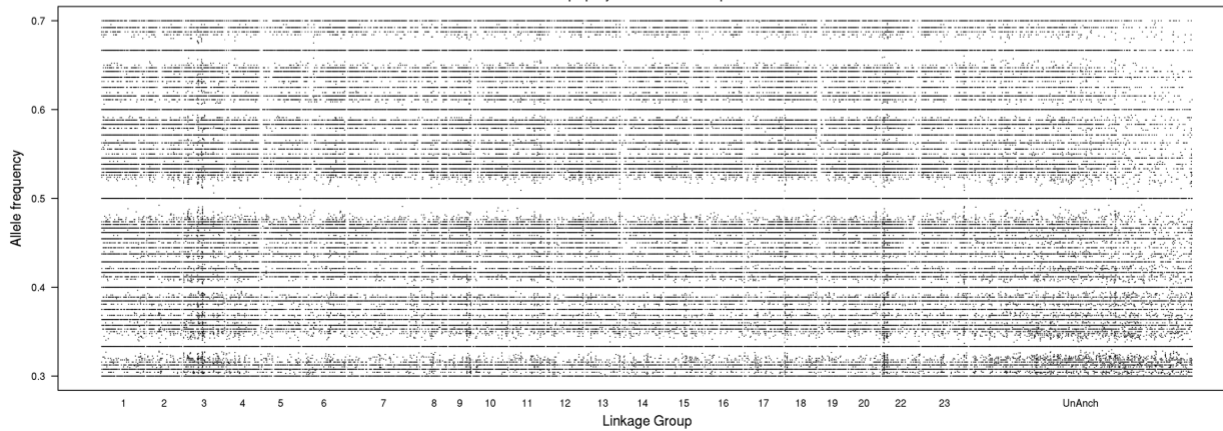



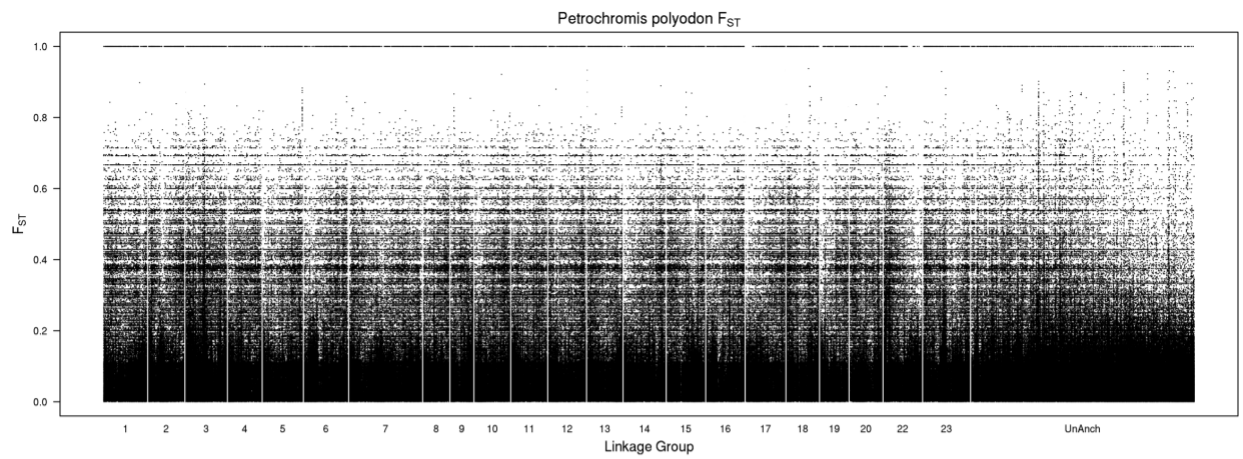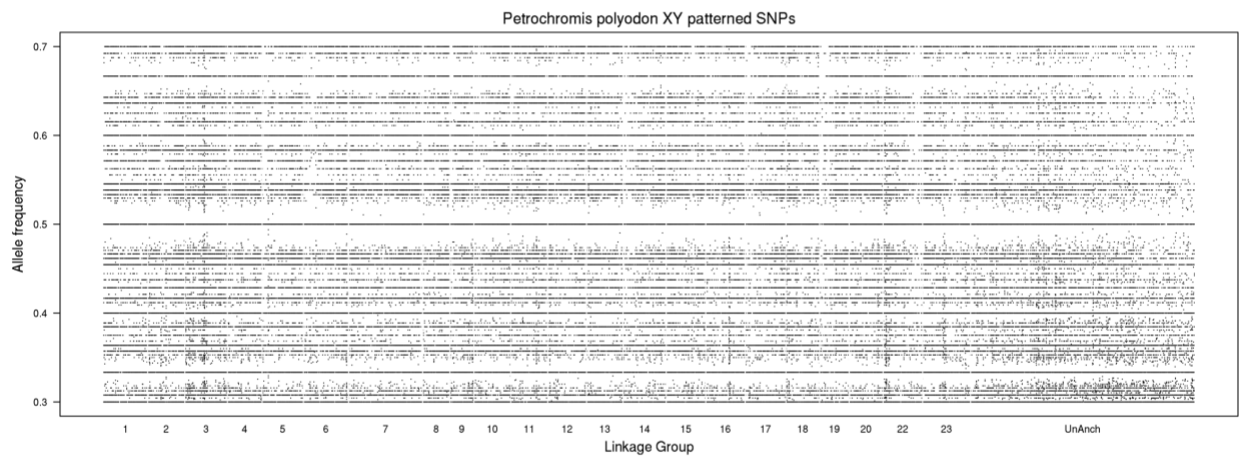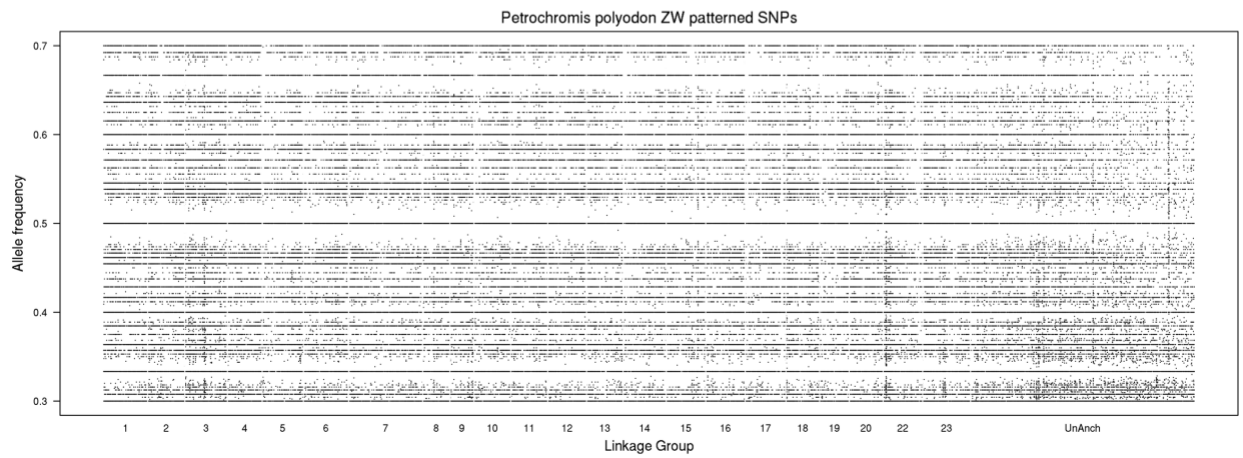

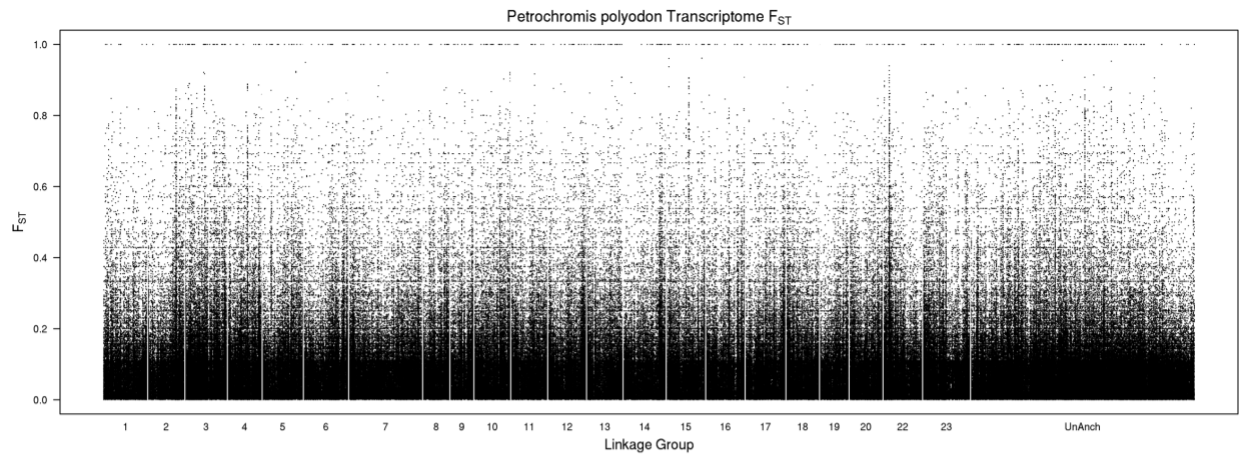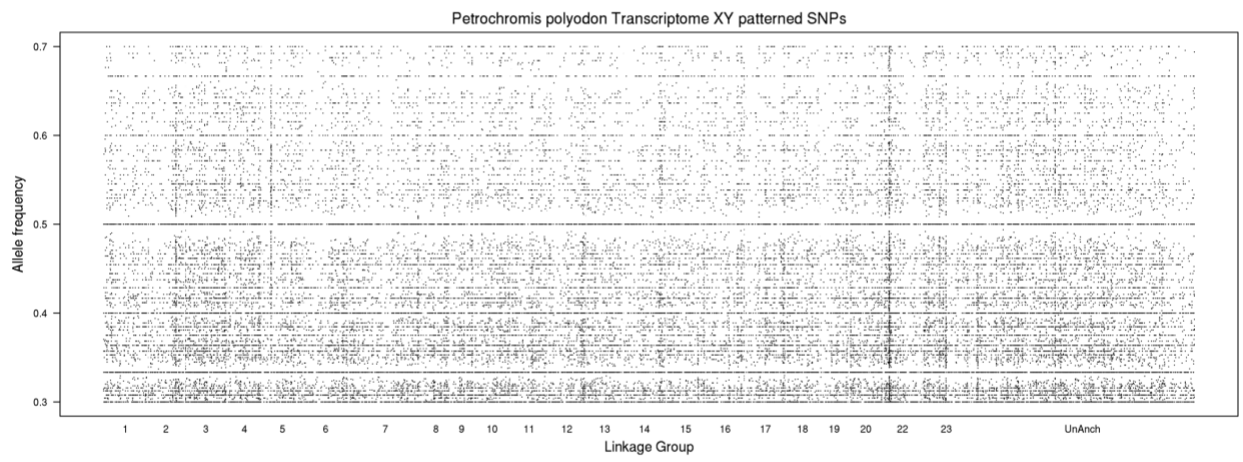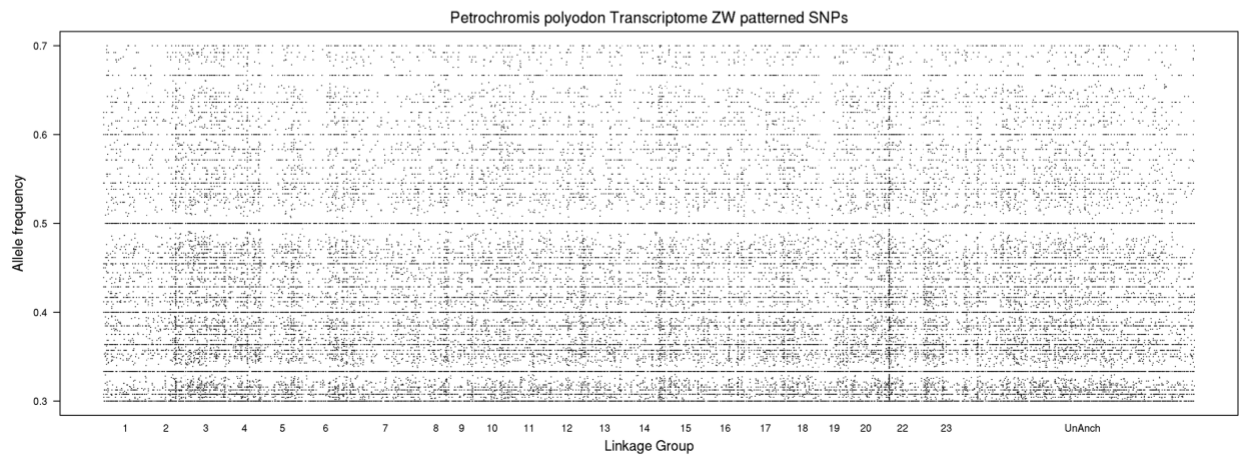

Simochromis diagramma  $F_{ST}$

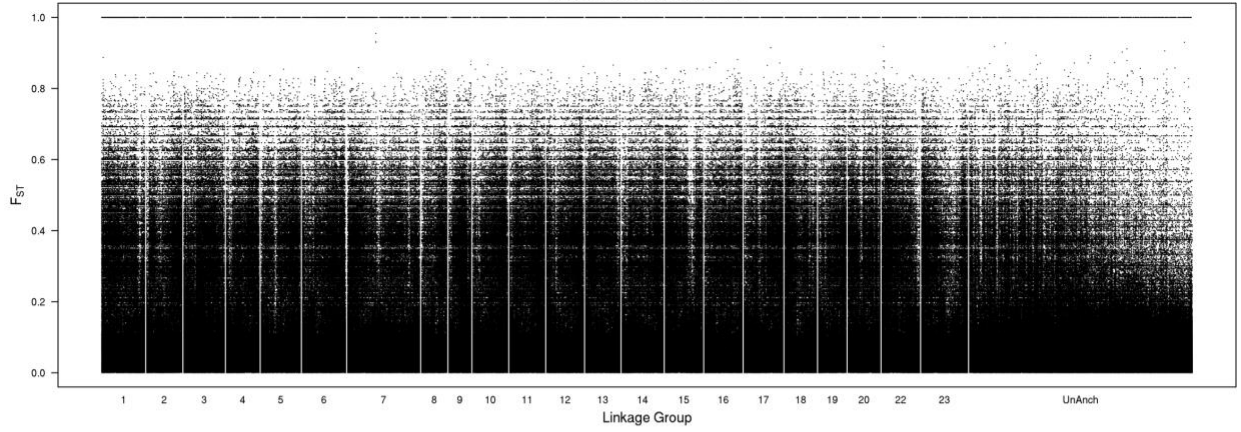

Simochromis diagramma XY patterned SNPs

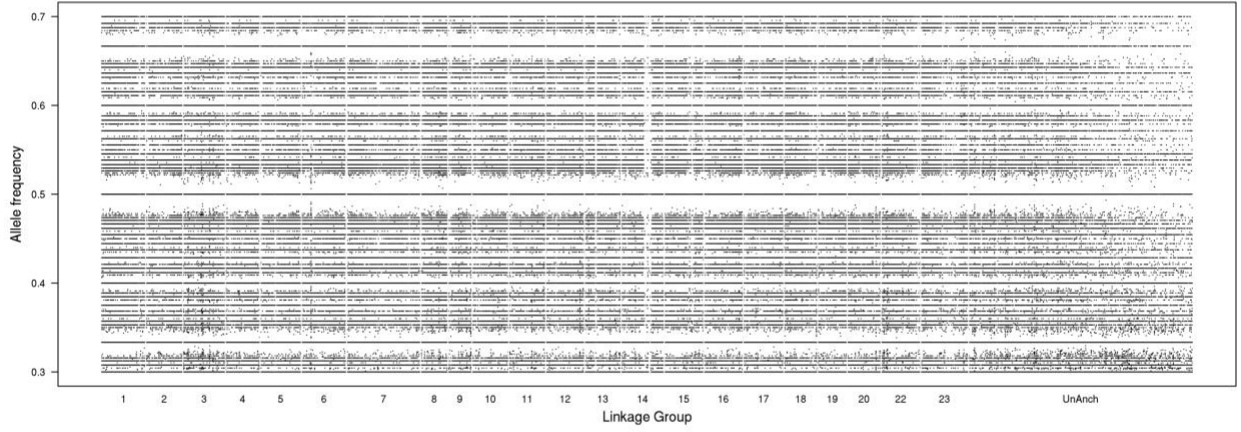

Simochromis diagramma ZW patterned SNPs

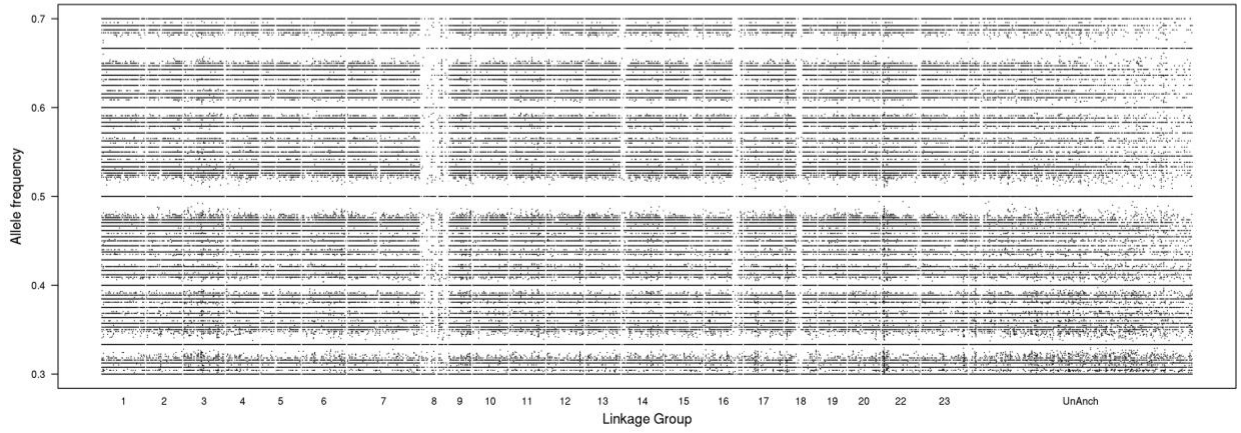

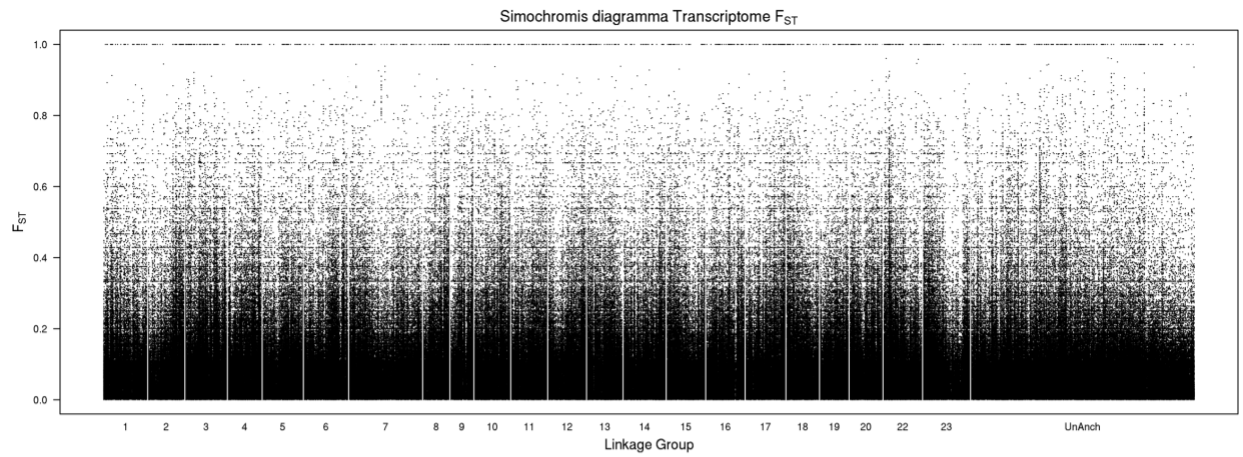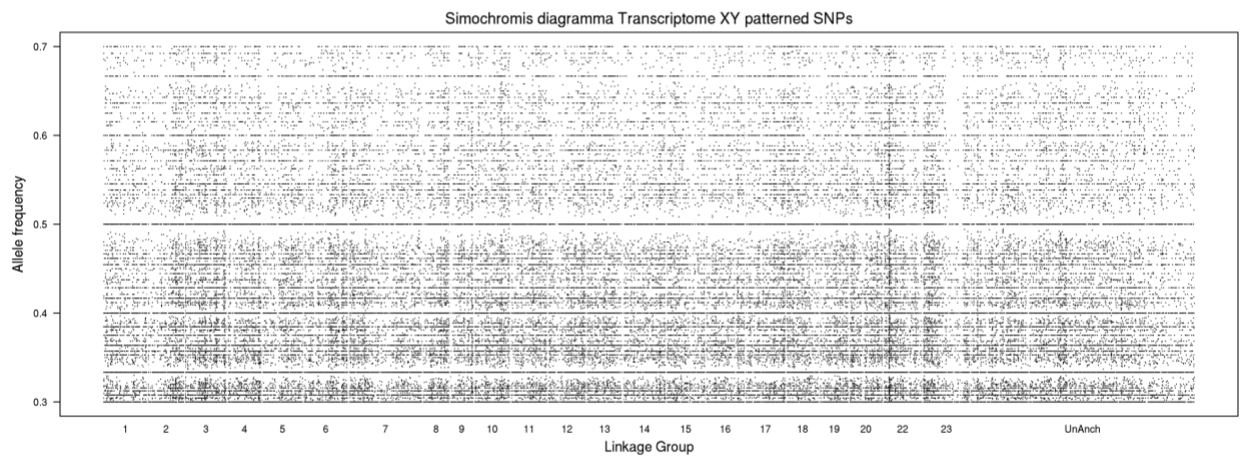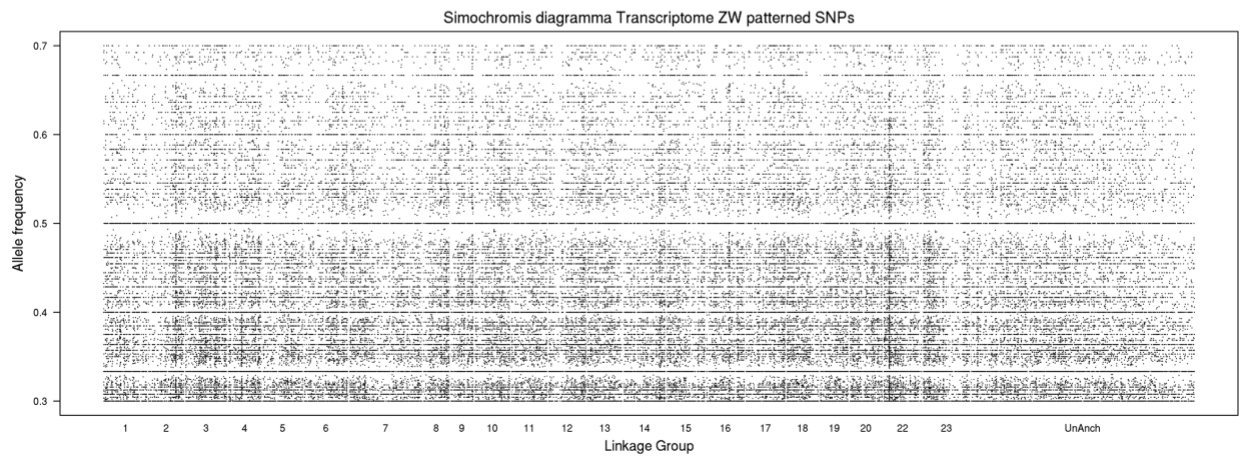

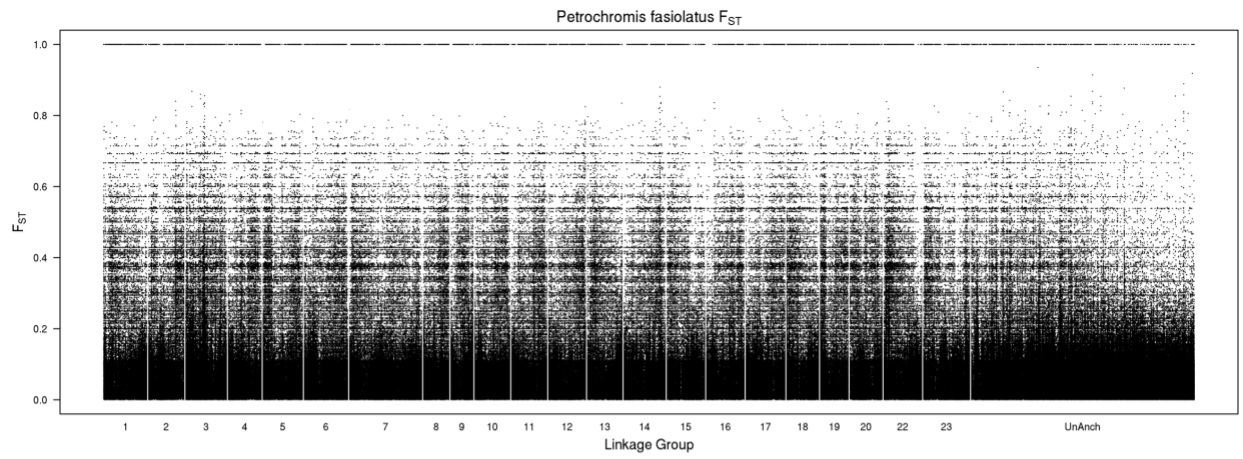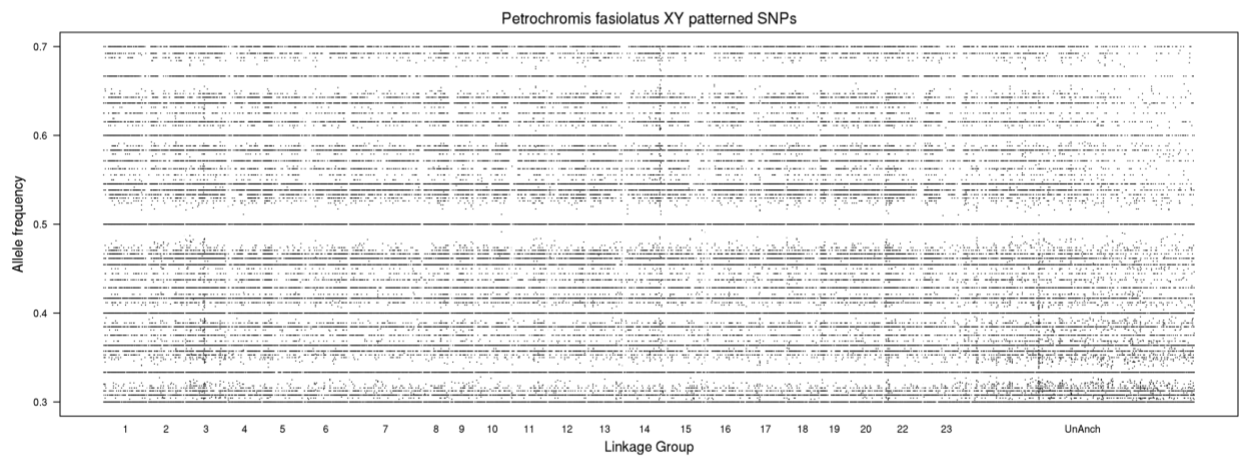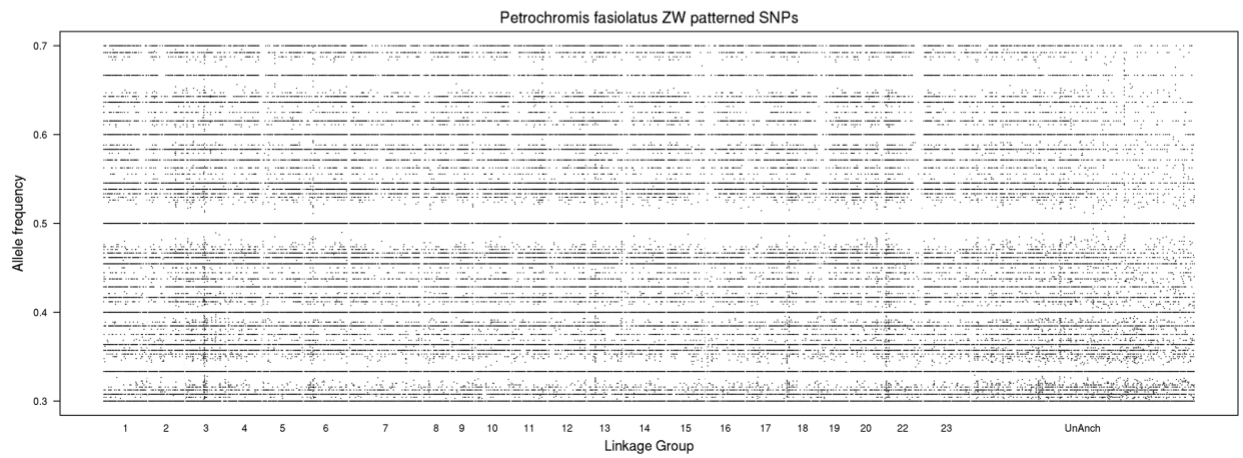

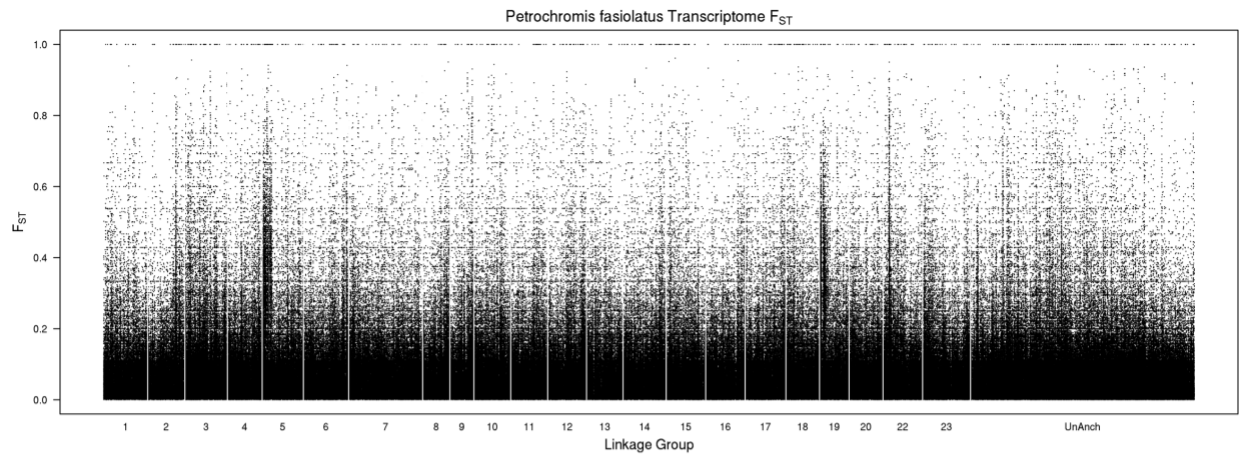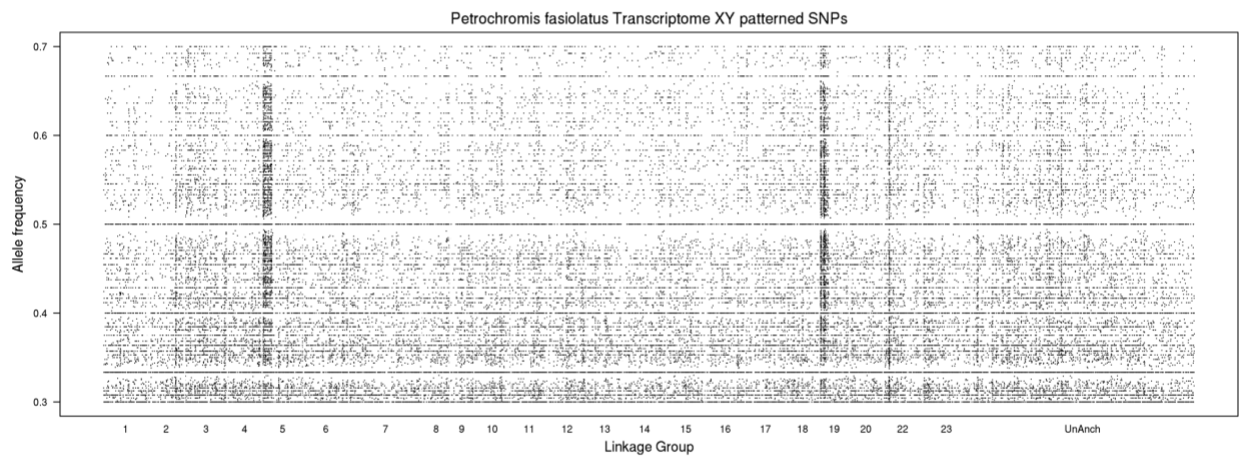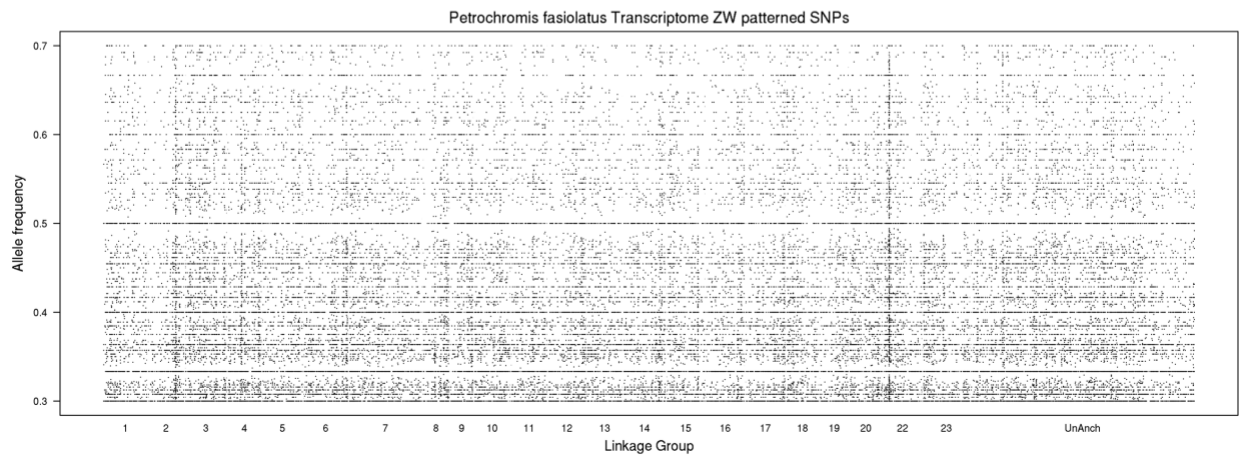

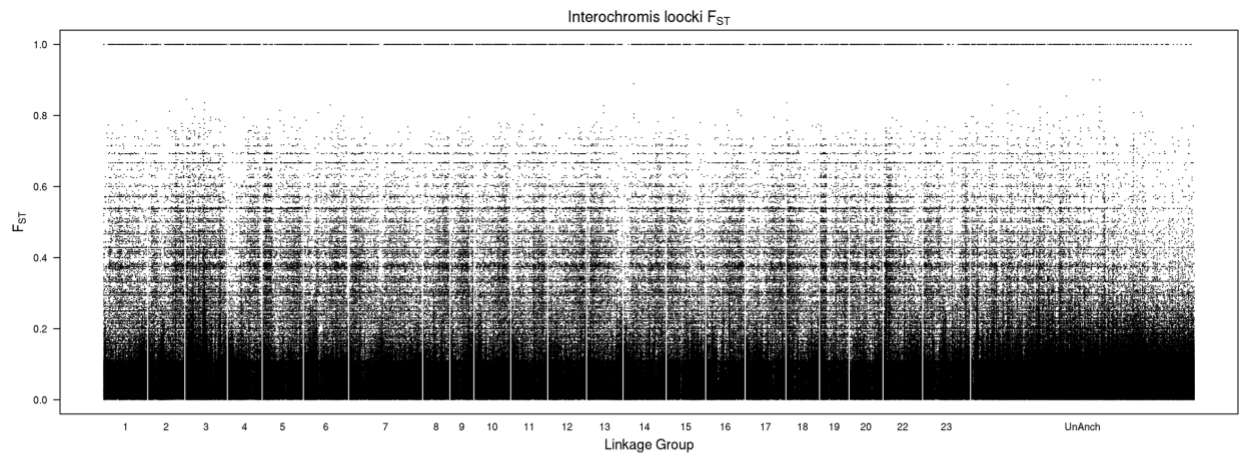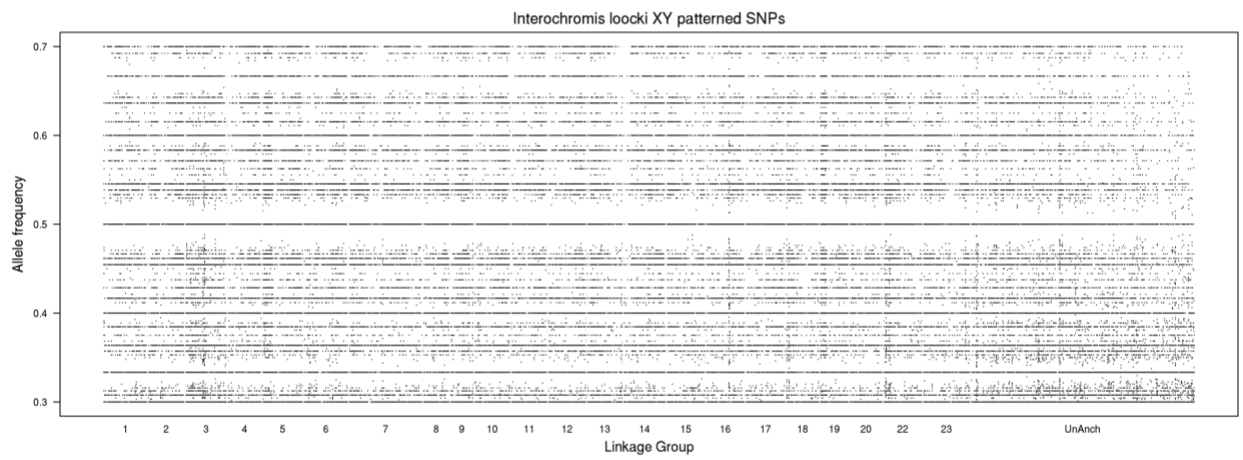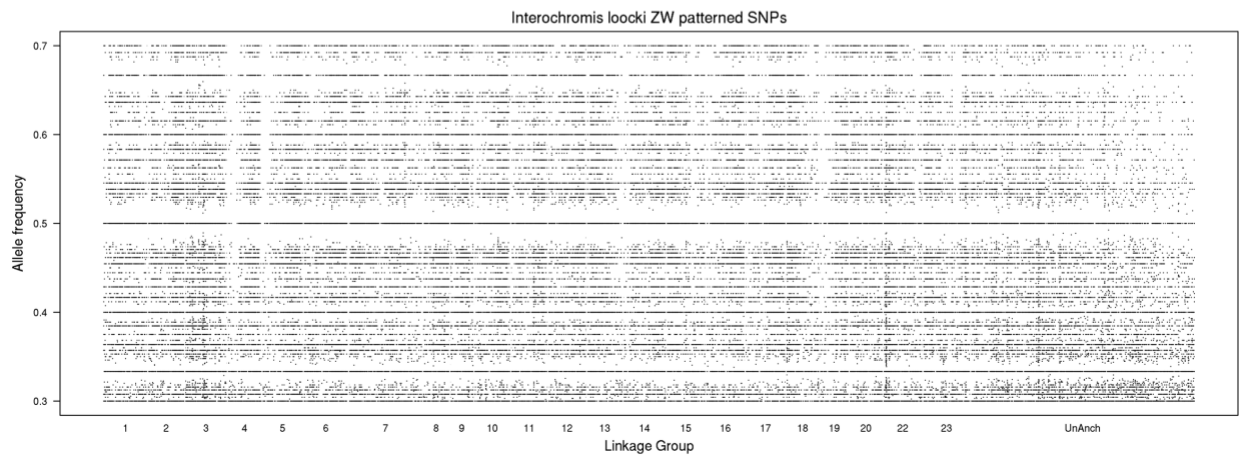

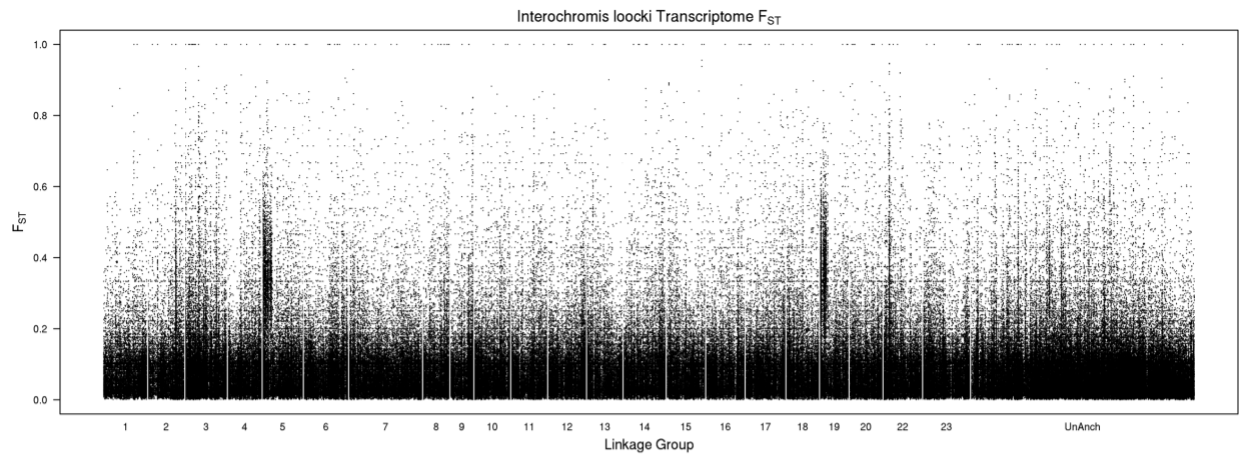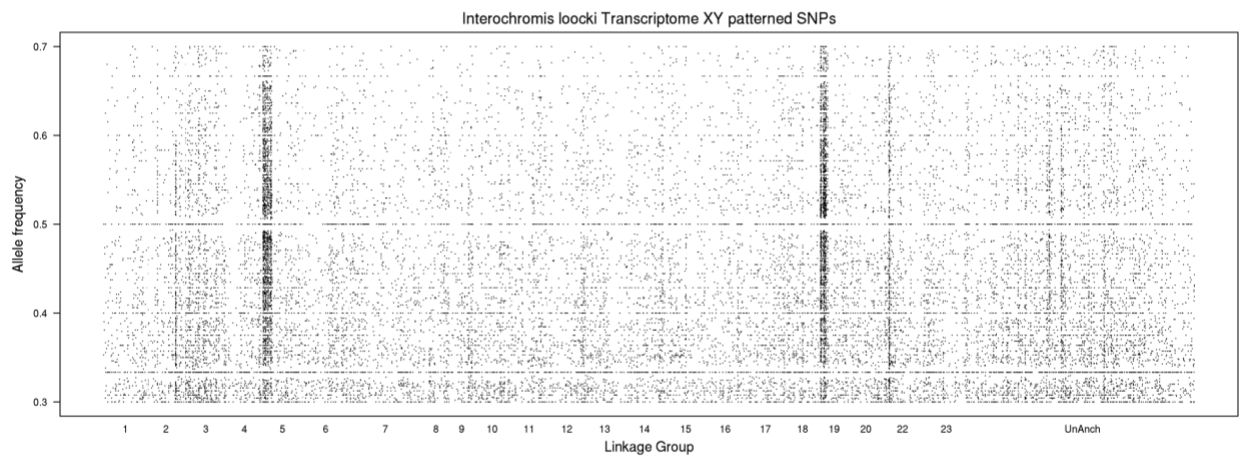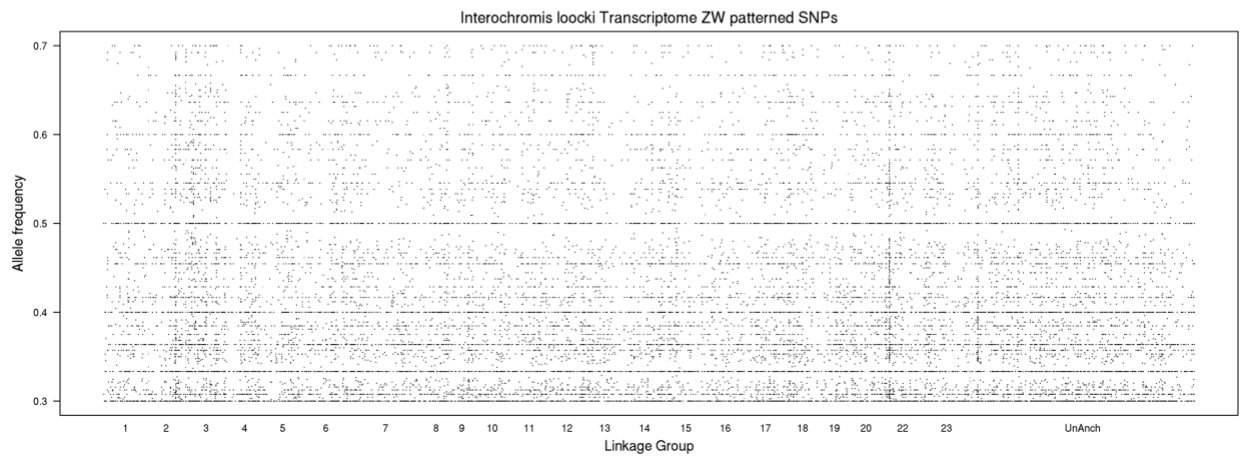



Petrochromis sp. orthognathus ikola  $F_{ST}$

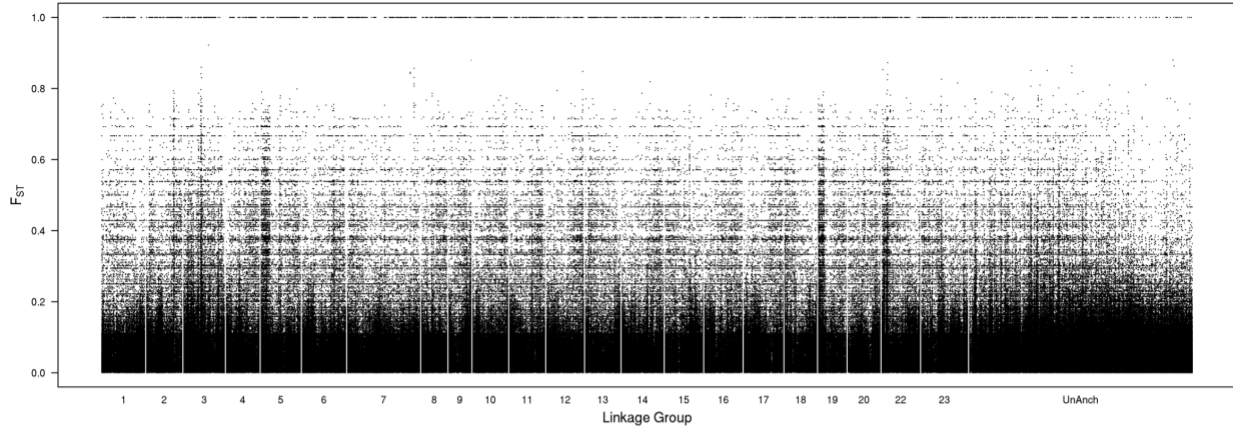

Petrochromis sp. orthognathus ikola XY patterned SNPs

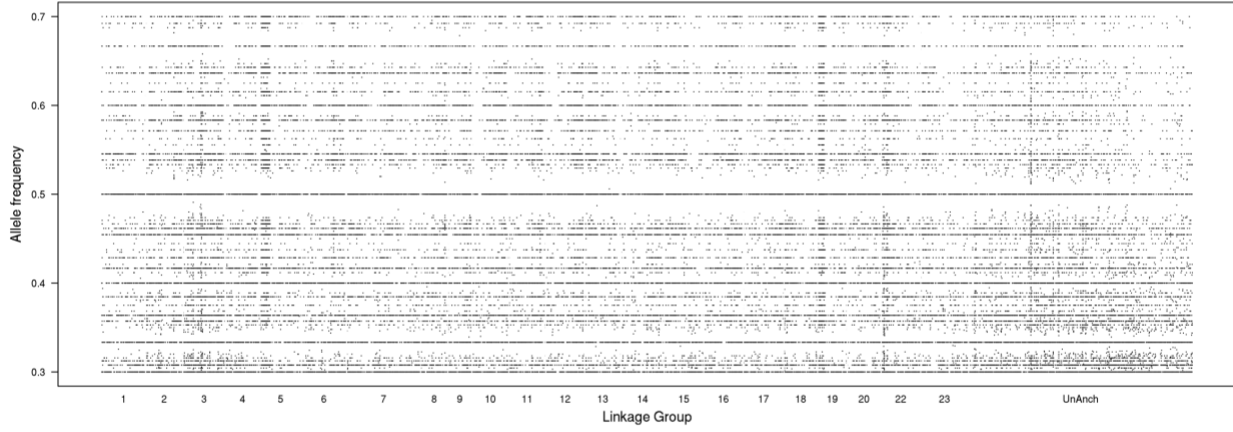

Petrochromis sp. orthognathus ikola ZW patterned SNPs

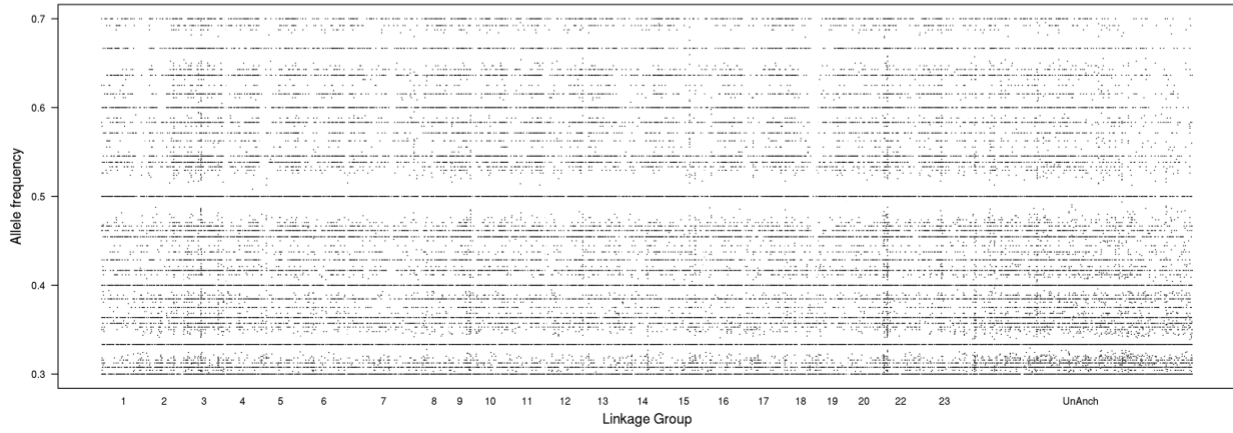

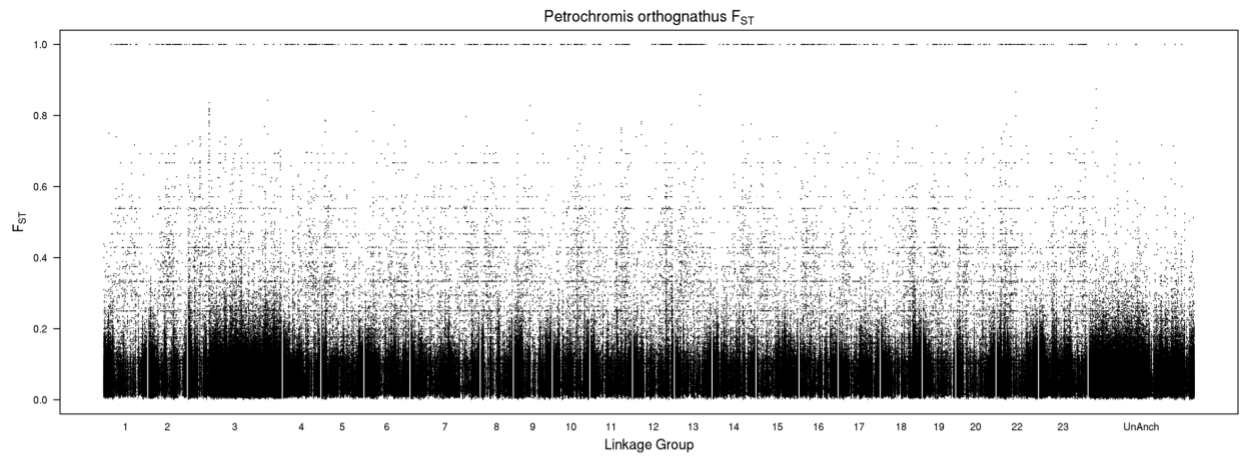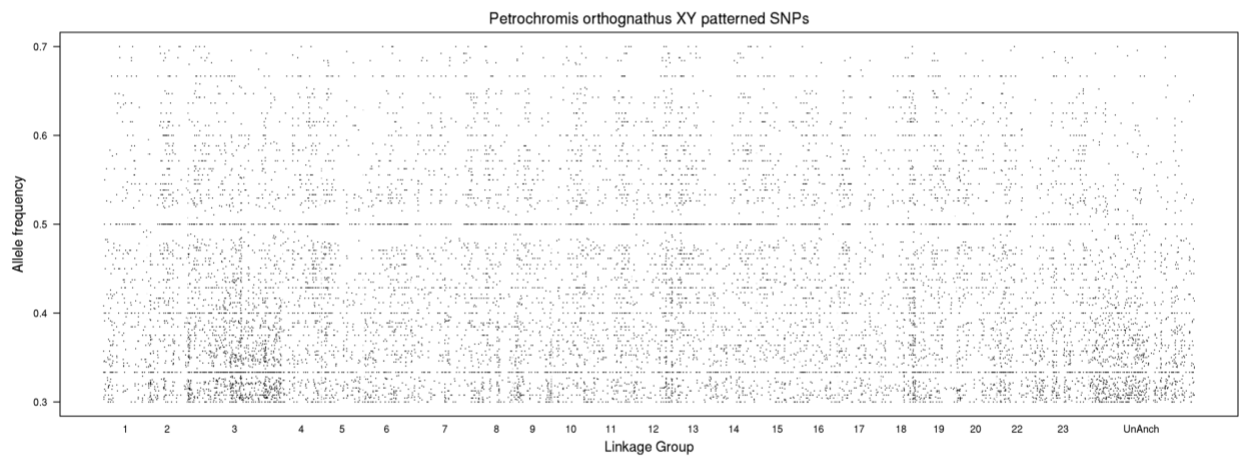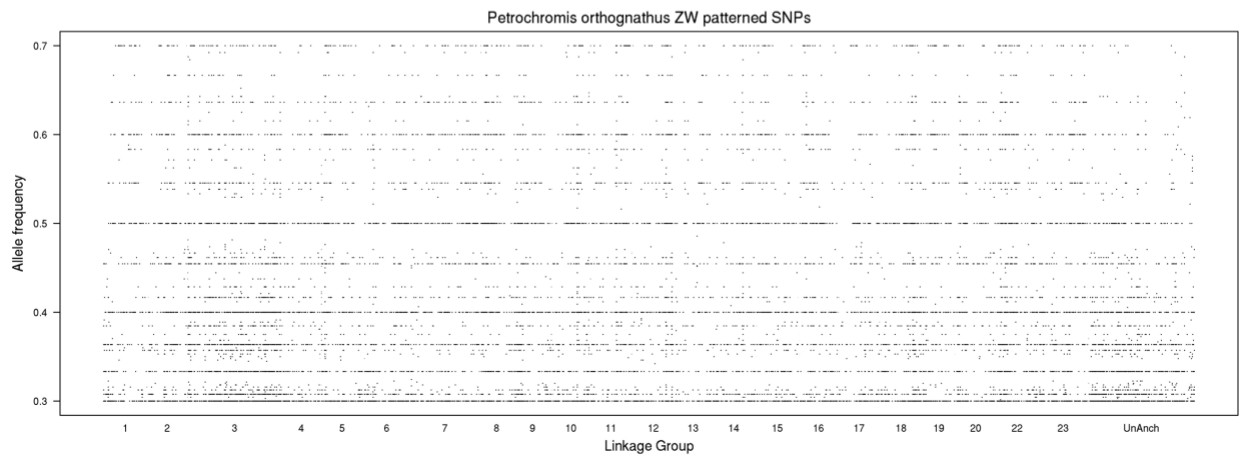

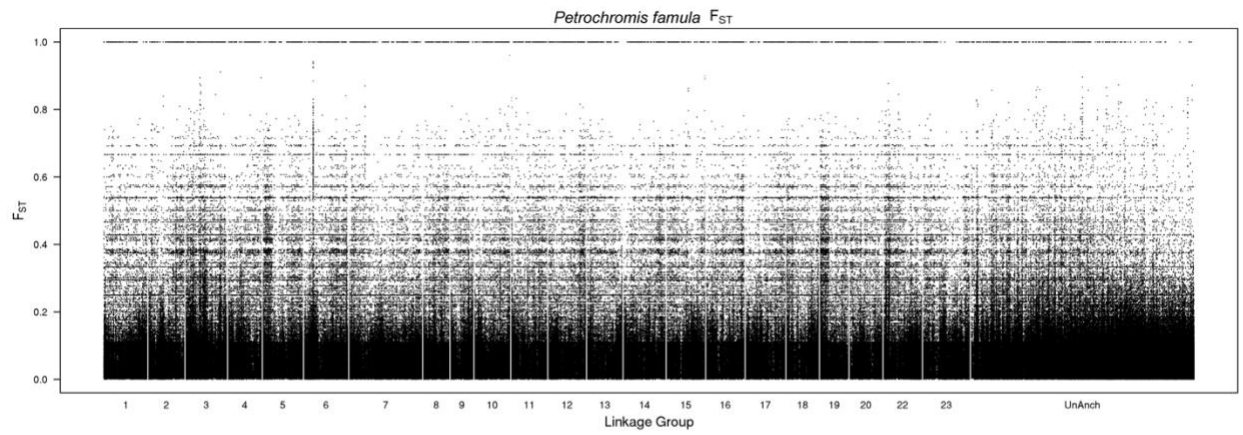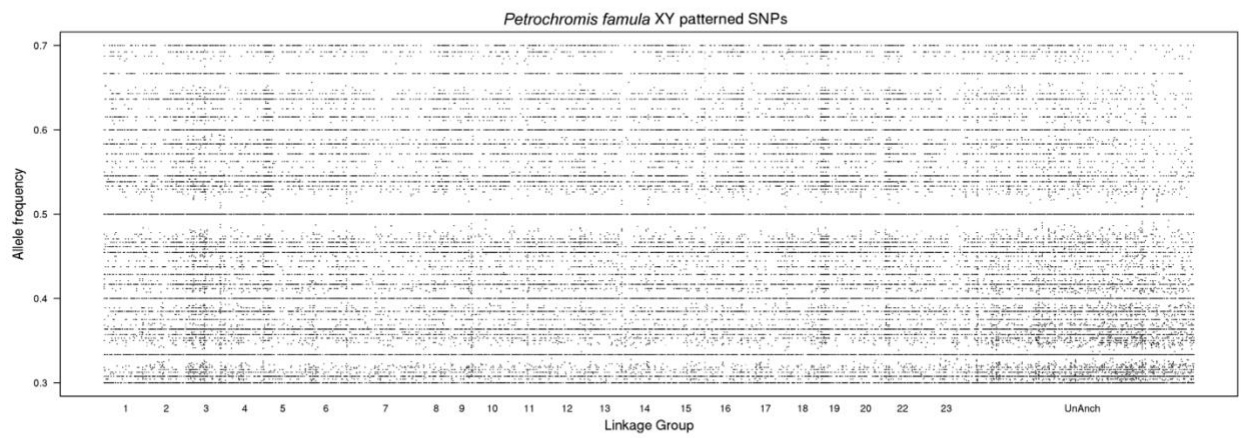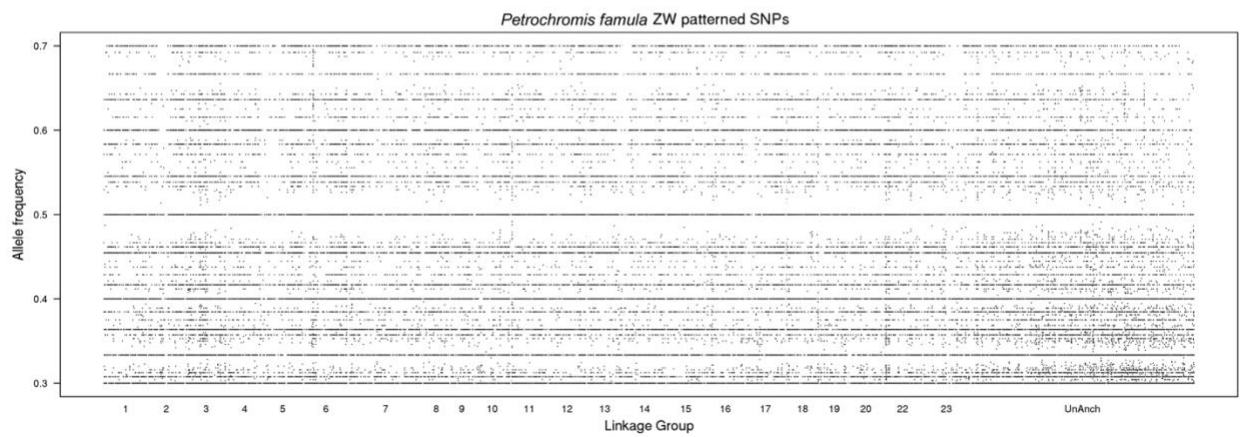

*Petrochromis famula* LG6  $F_{ST}$

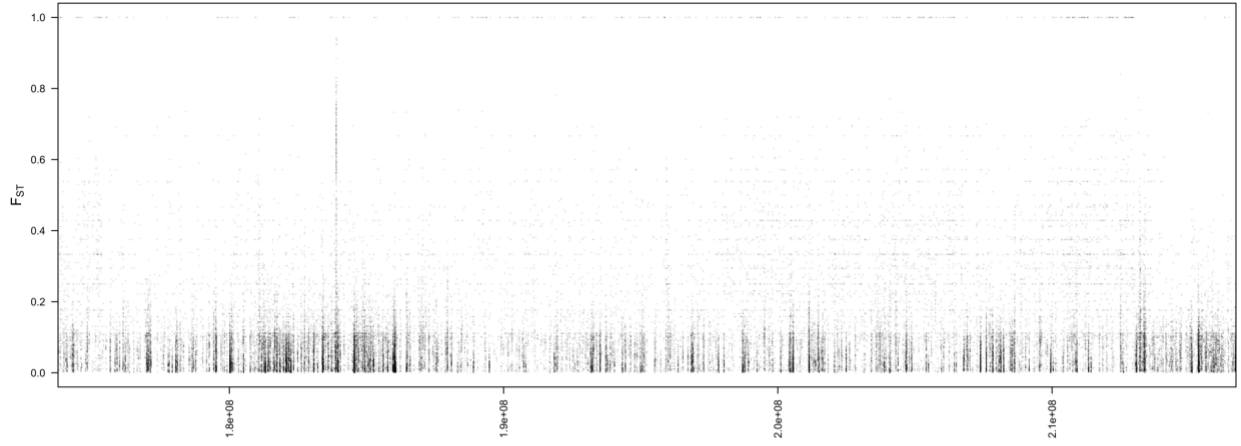

*Petrochromis famula* XY patterned SNPs LG6

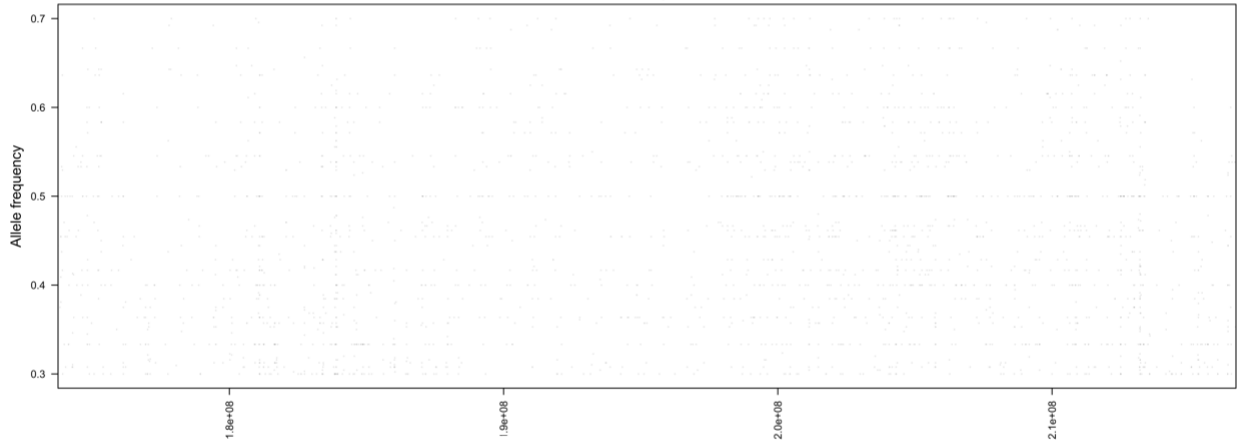

*Petrochromis famula* ZW patterned SNPs LG6

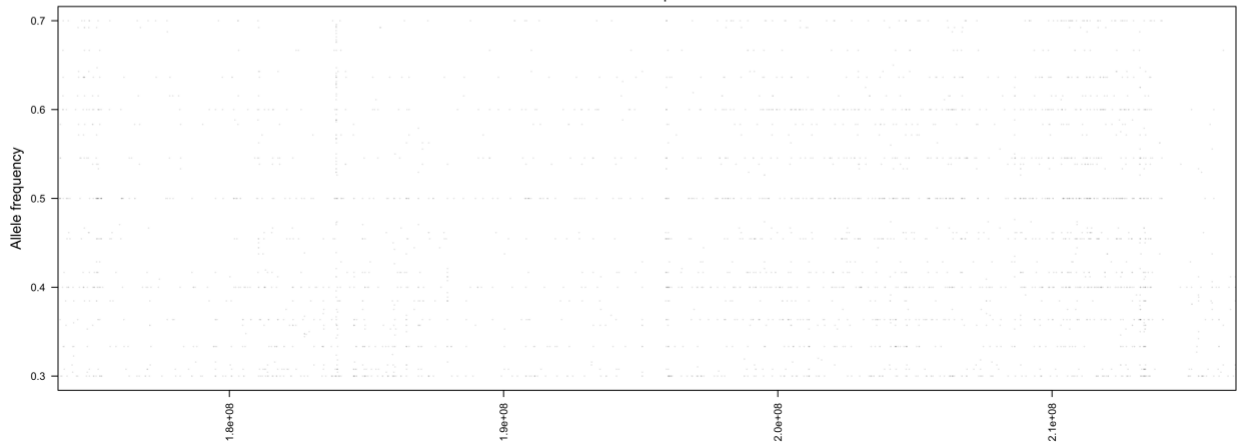

Petrochromis famula Transcriptome  $F_{ST}$

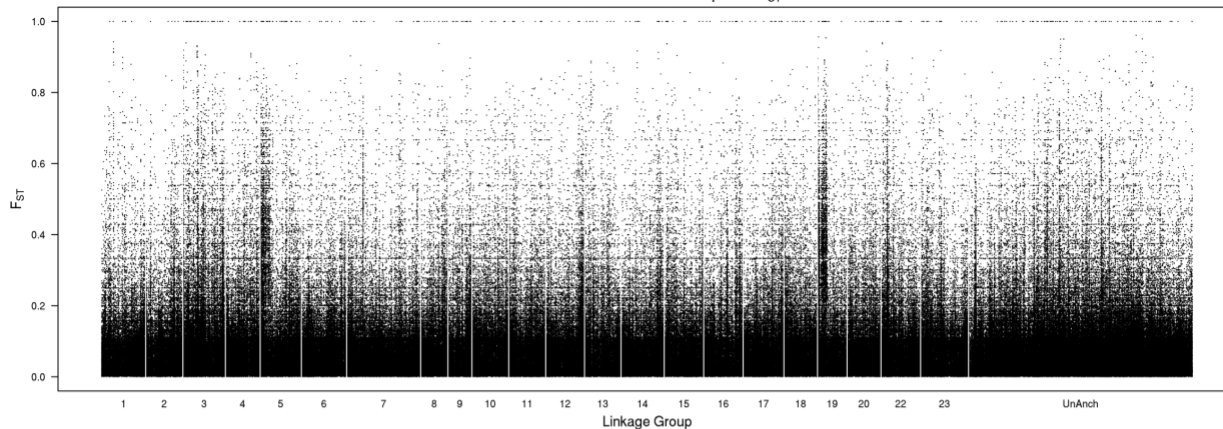

Petrochromis famula Transcriptome XY patterned SNPs

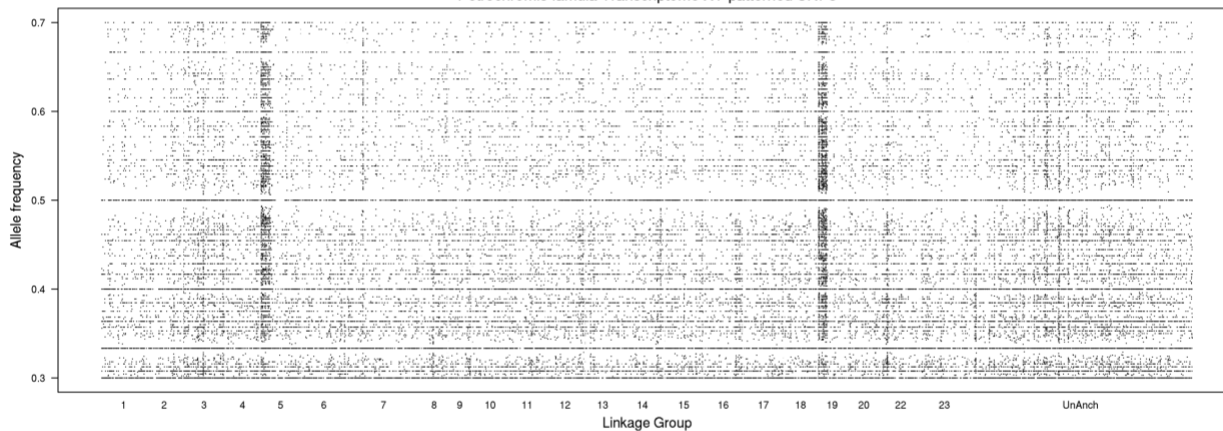

Petrochromis famula Transcriptome ZW patterned SNPs

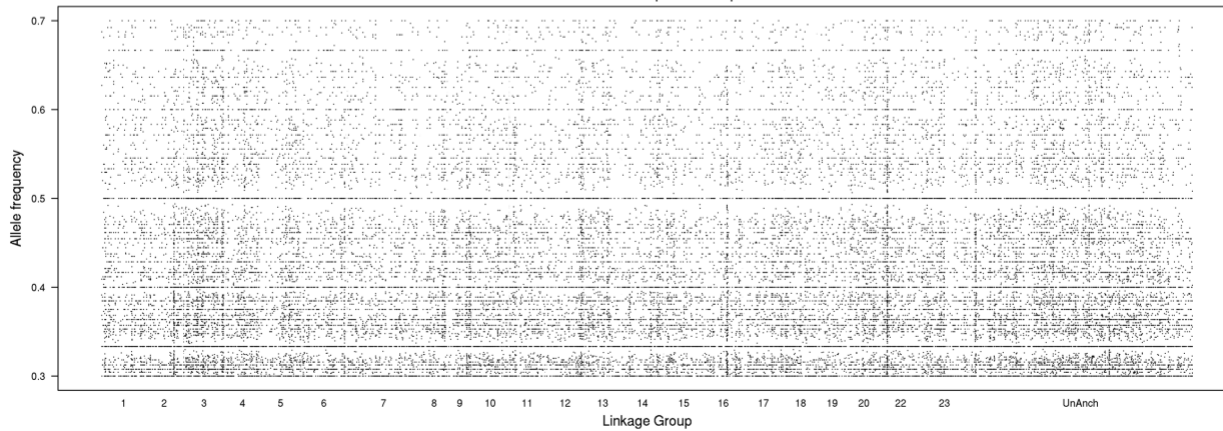

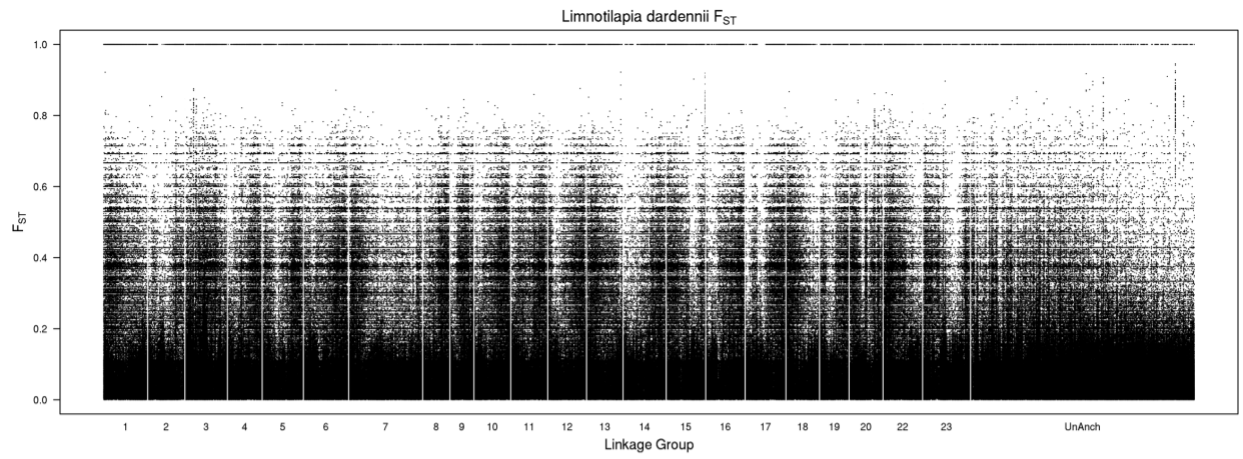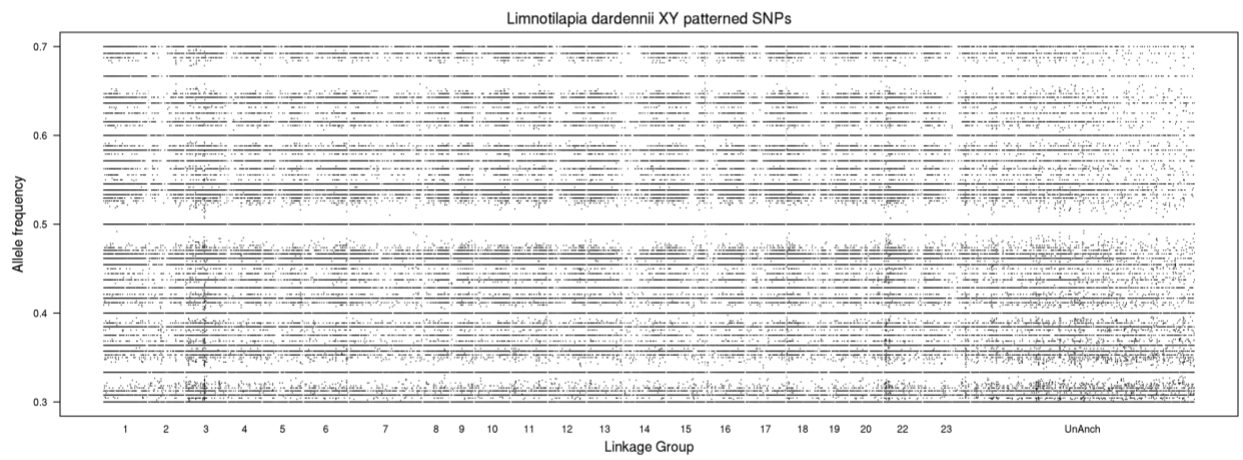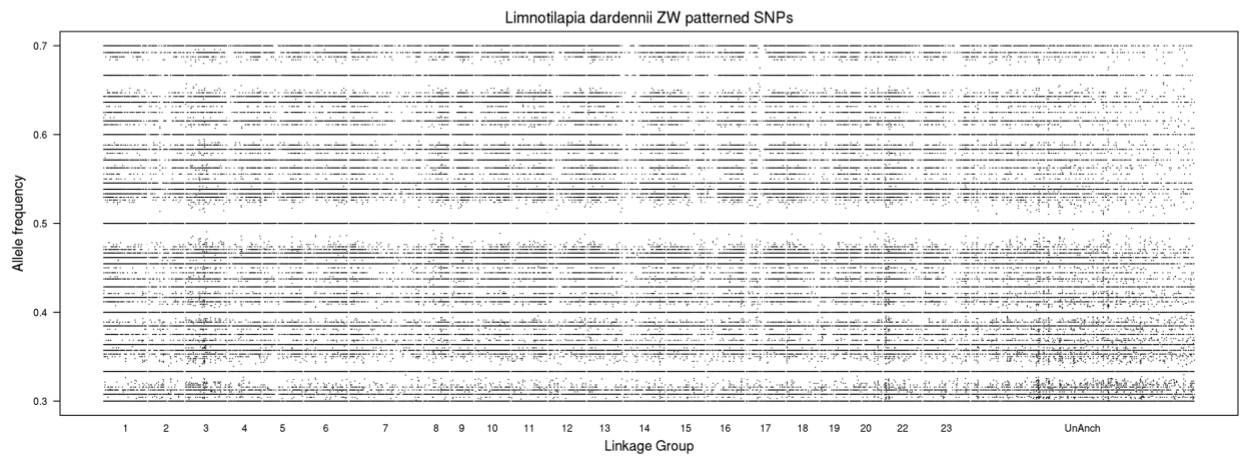

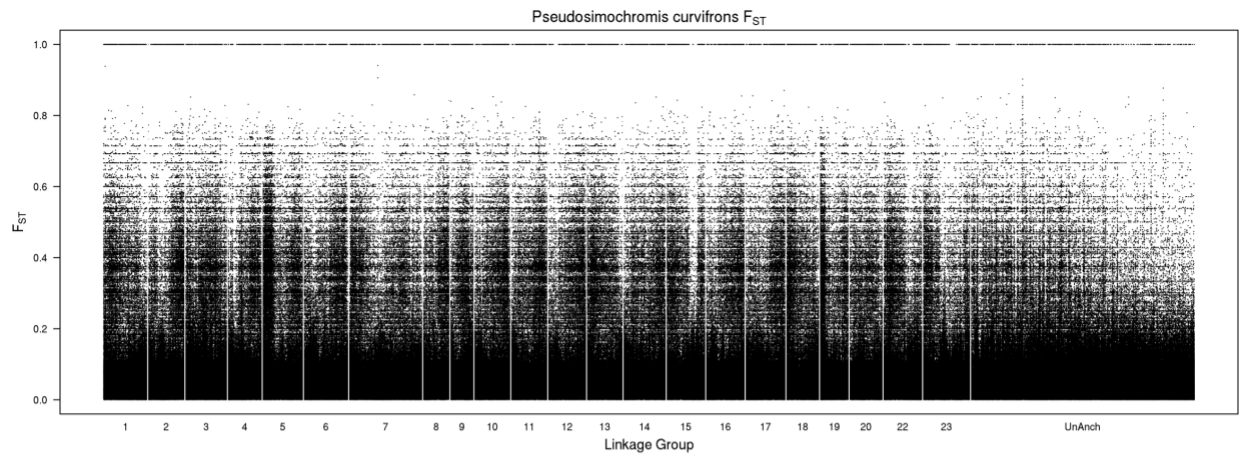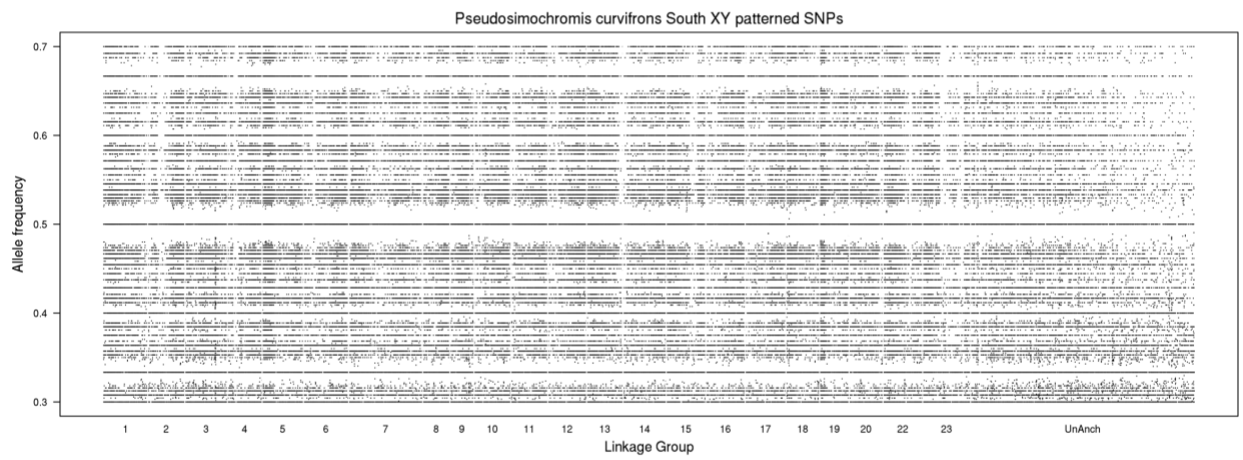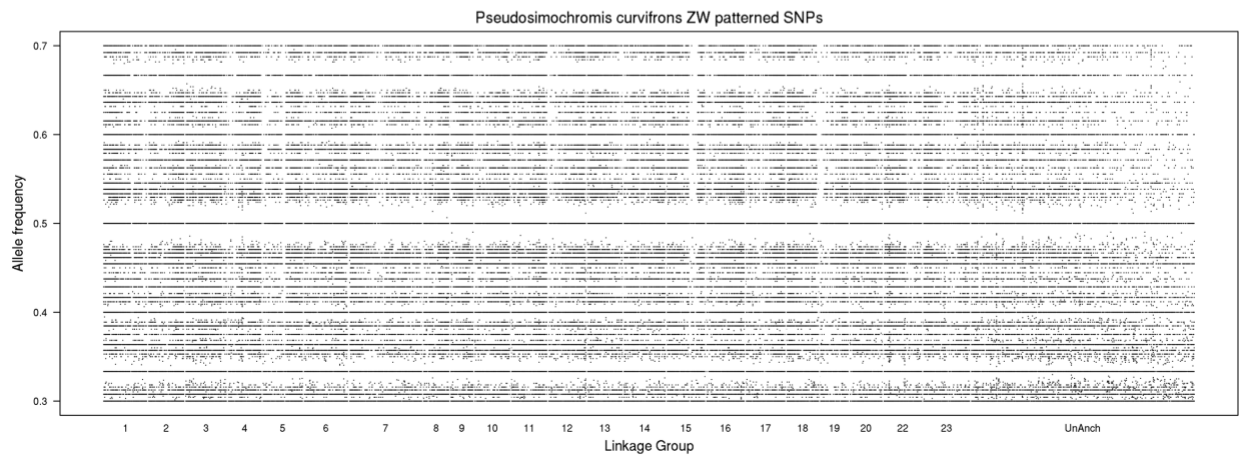

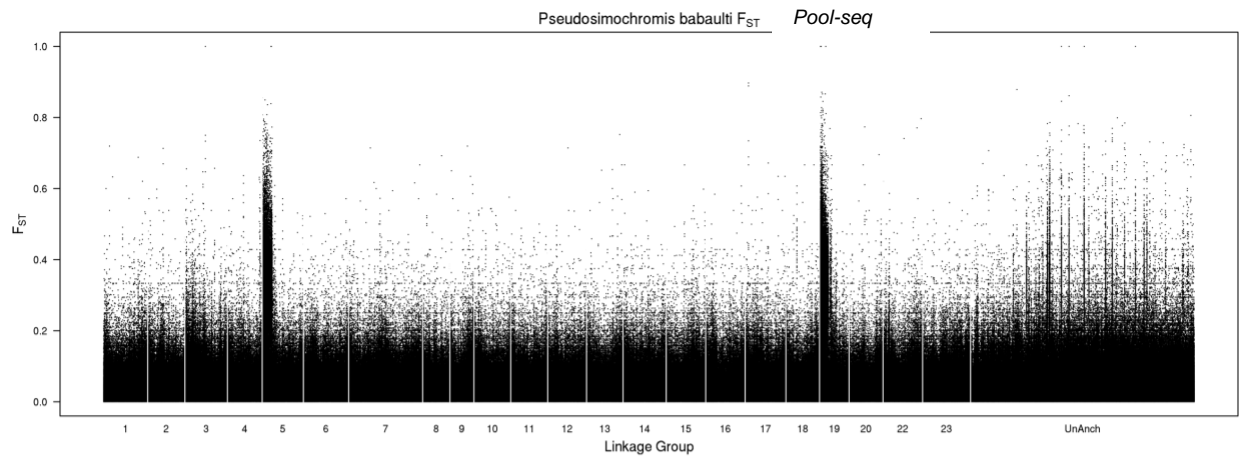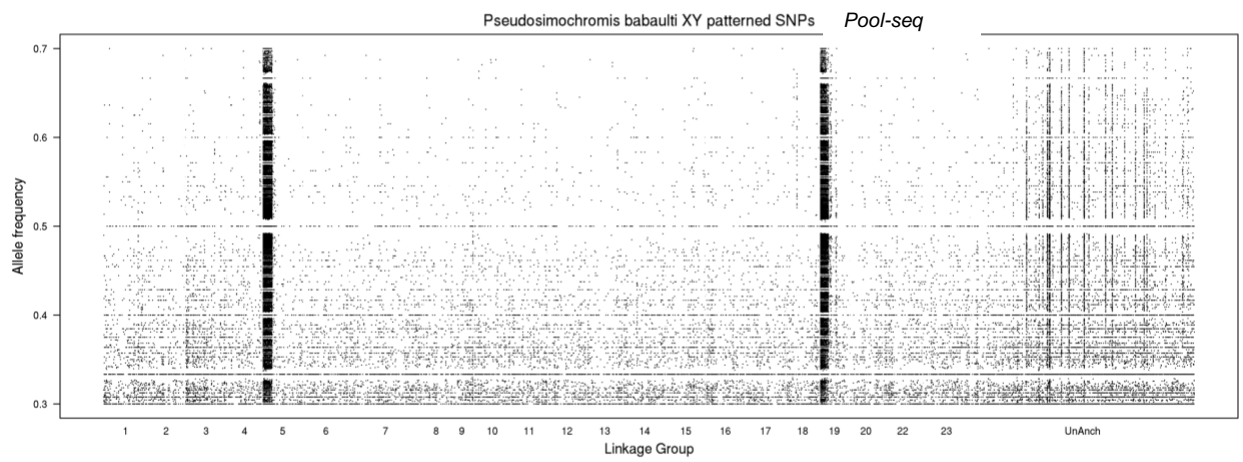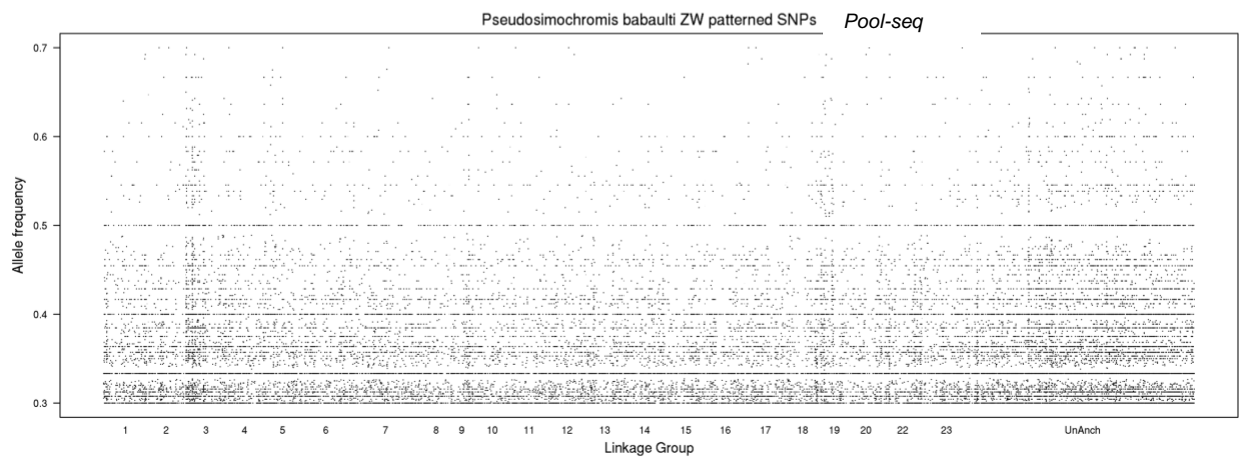



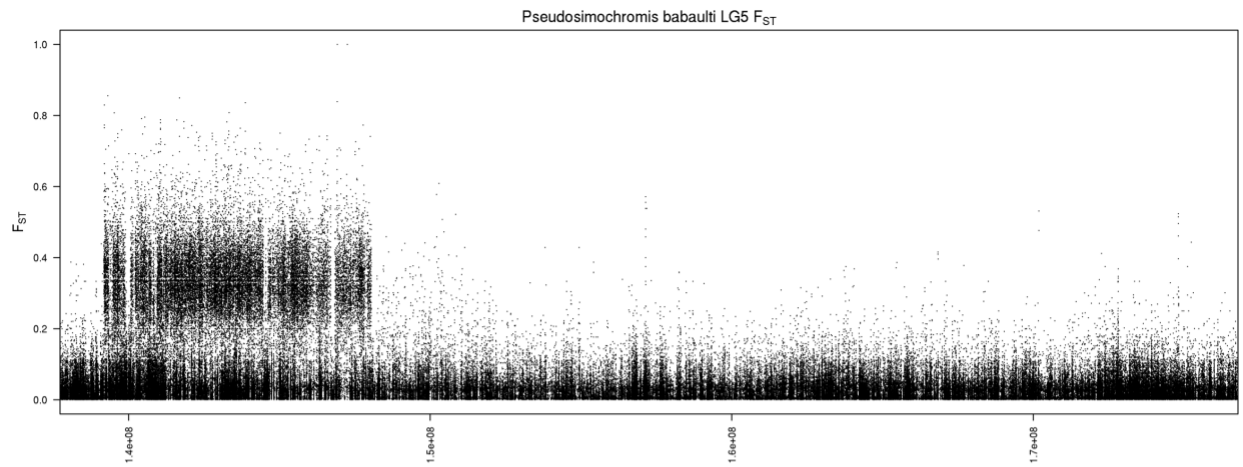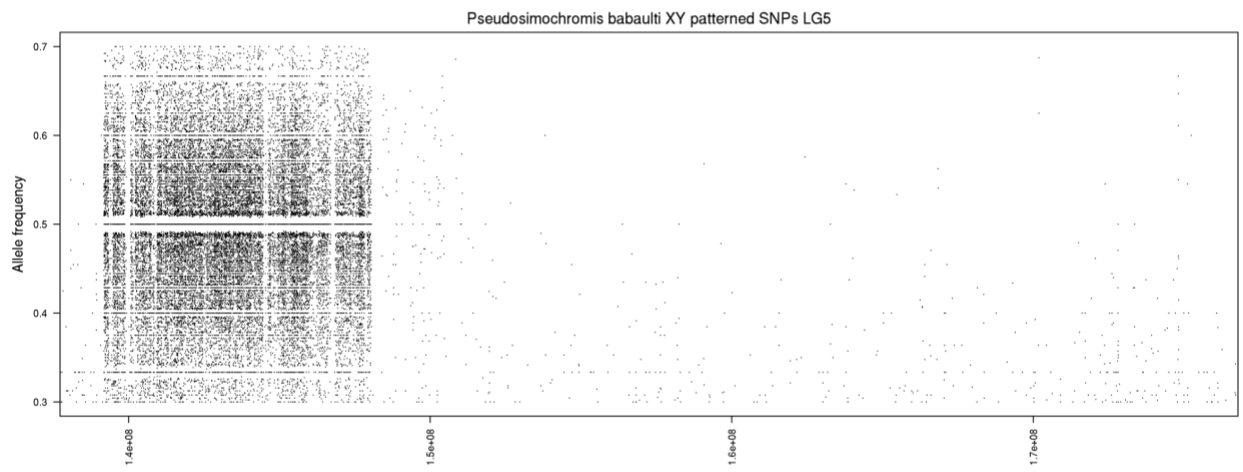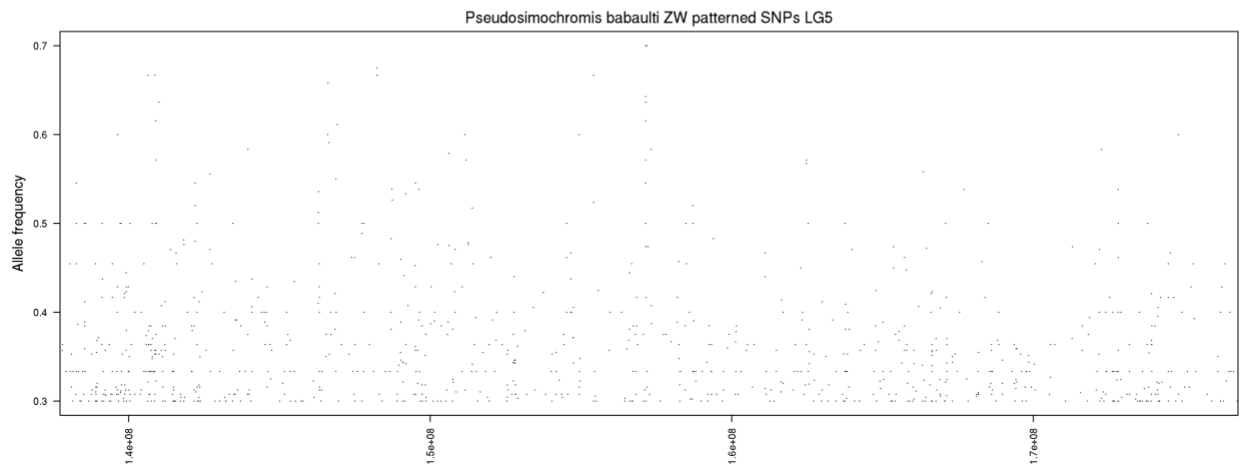

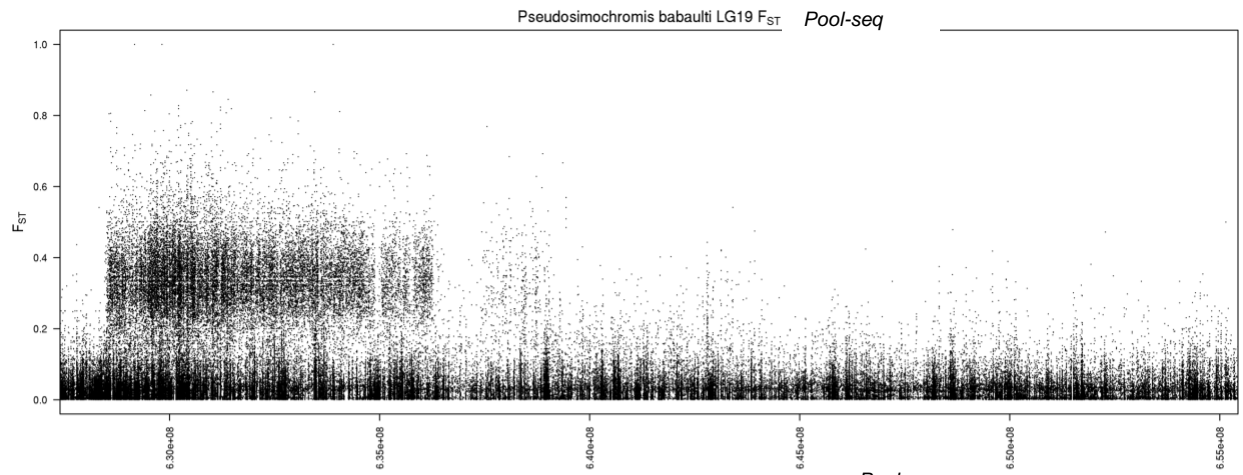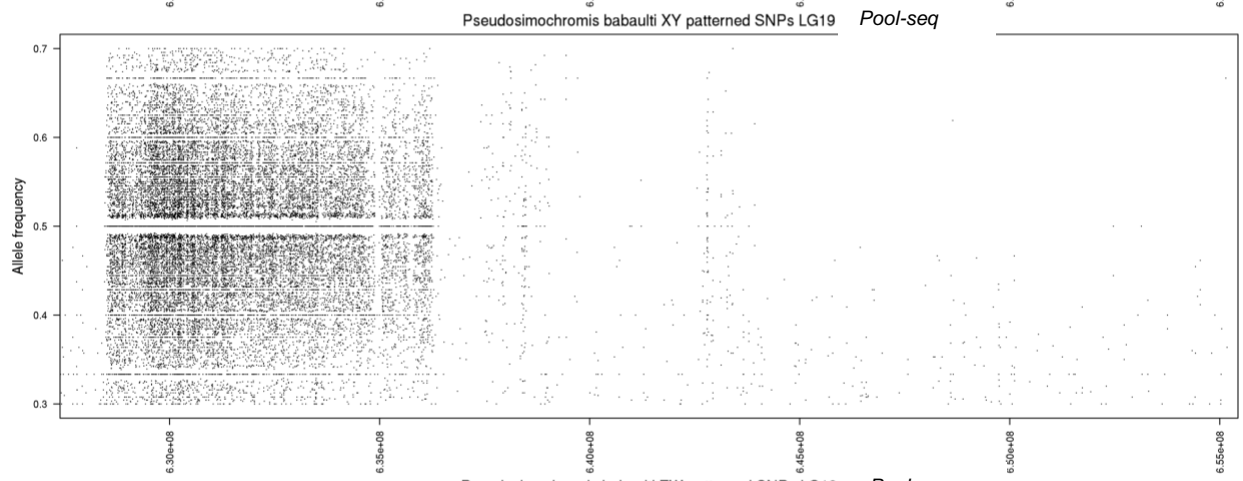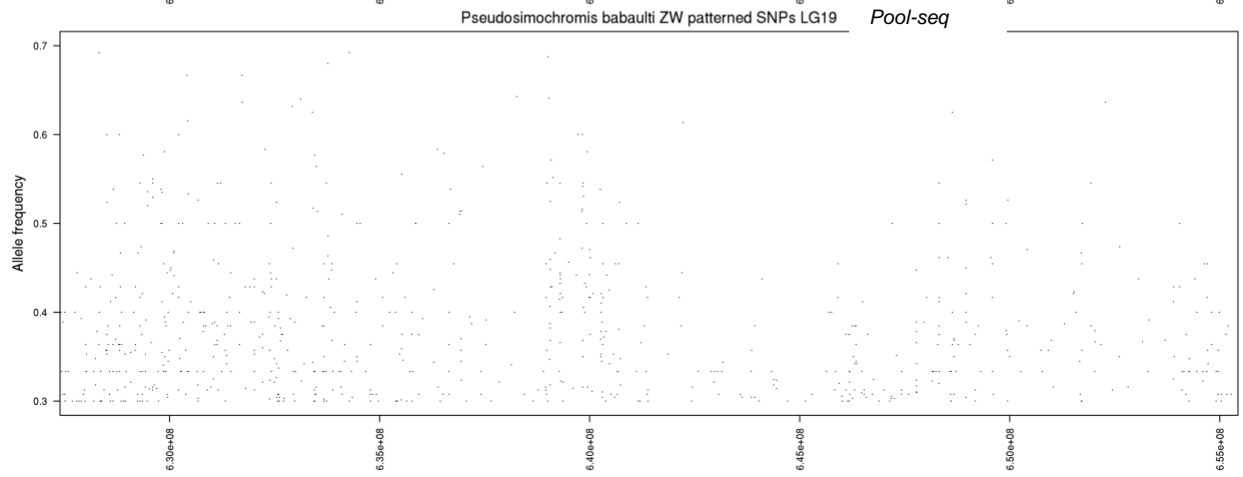

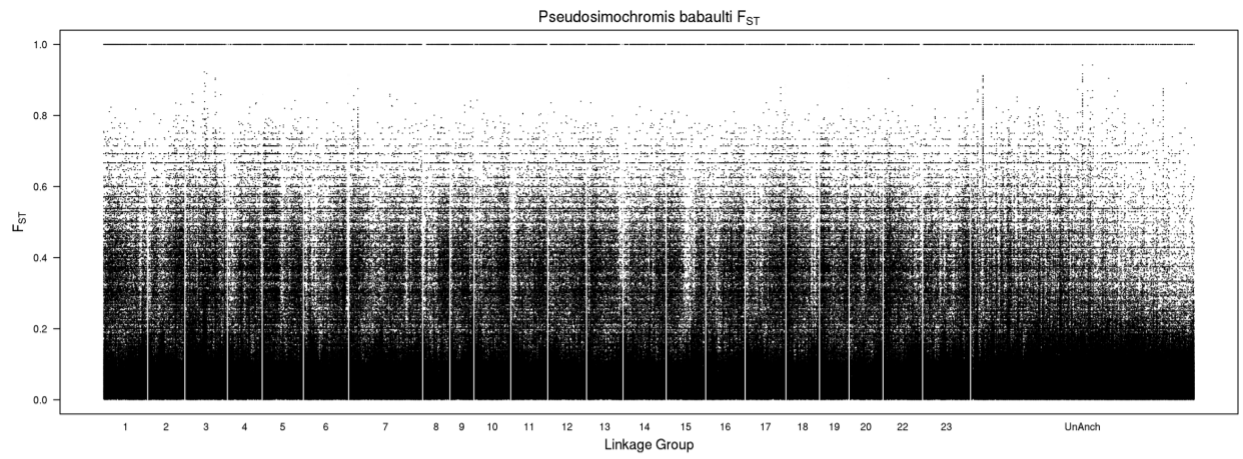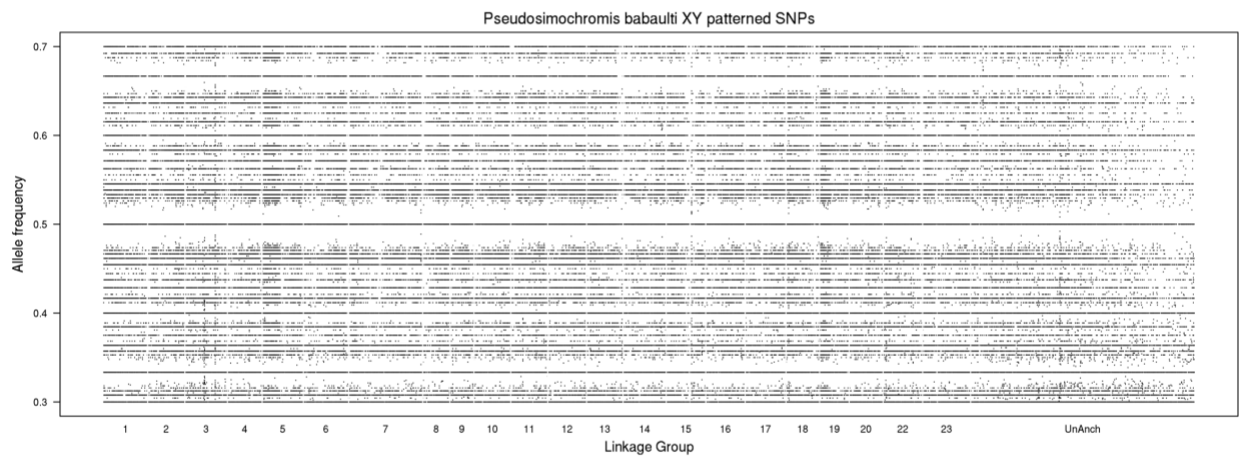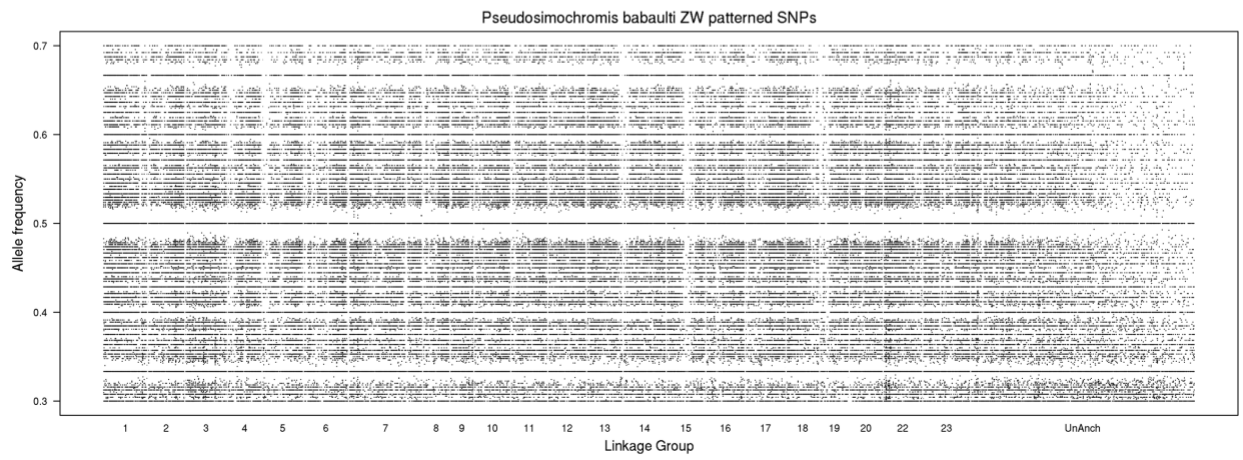

Pseudosimochromis babaulti South  $F_{ST}$

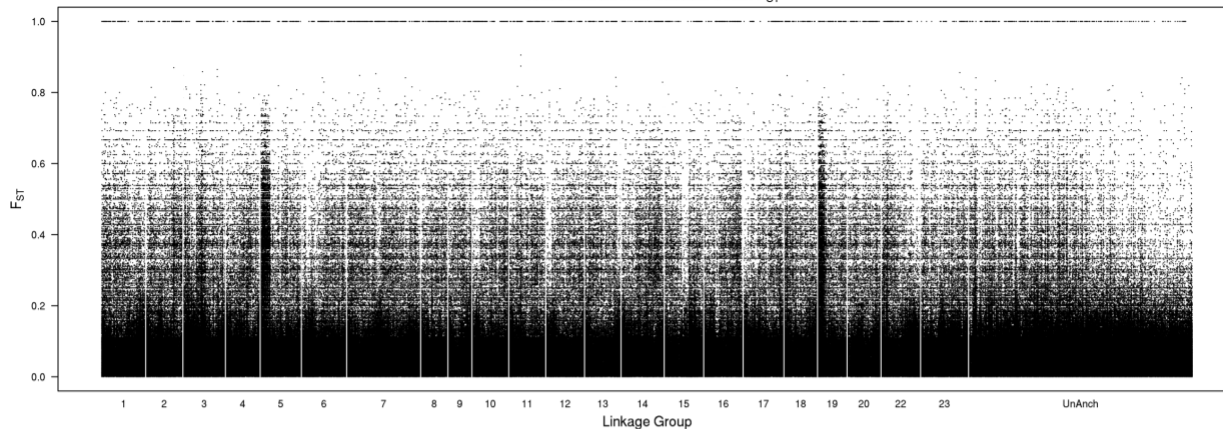

Pseudosimochromis babaulti South XY patterned SNPs

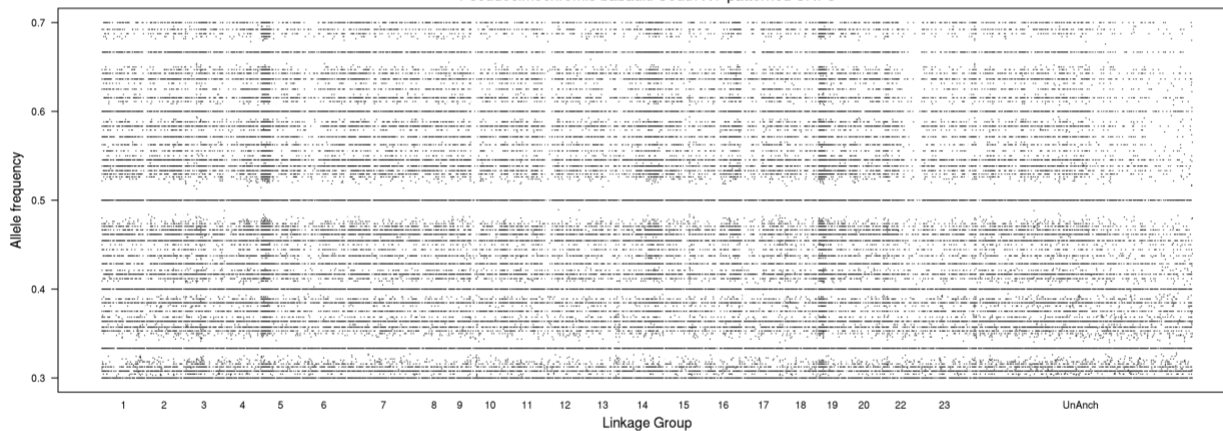

Pseudosimochromis babaulti South ZW patterned SNPs

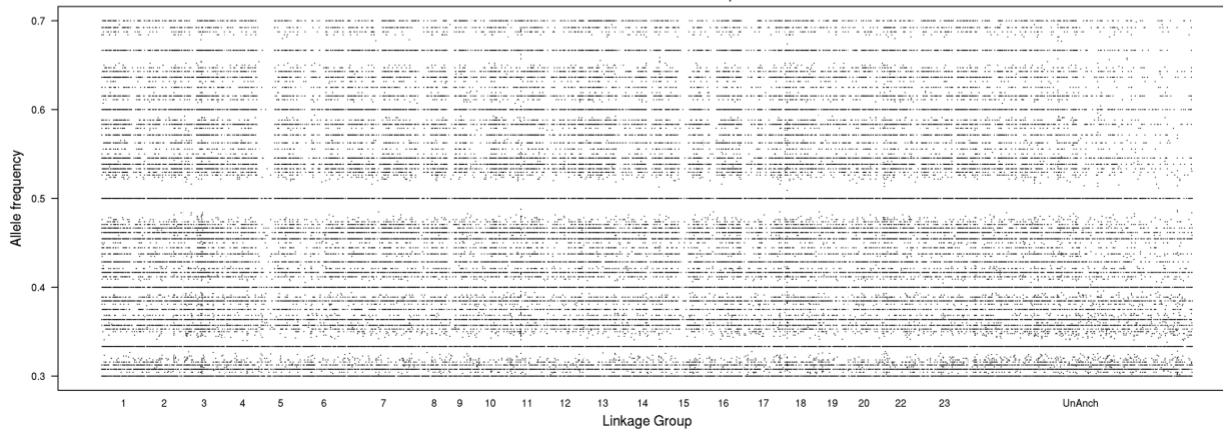

Pseudosimochromis marginatus North  $F_{ST}$

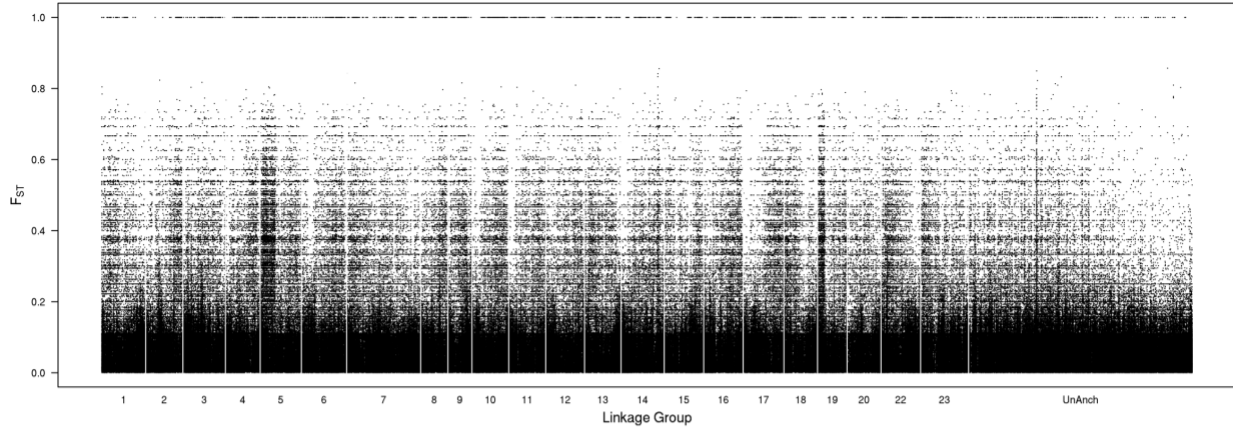

Pseudosimochromis marginatus North XY patterned SNPs

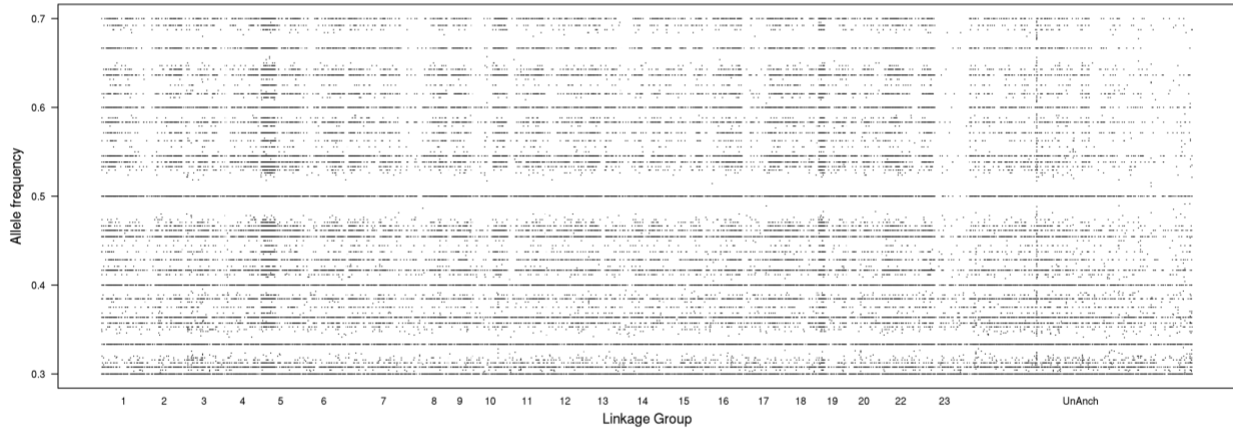

Pseudosimochromis marginatus North ZW patterned SNPs

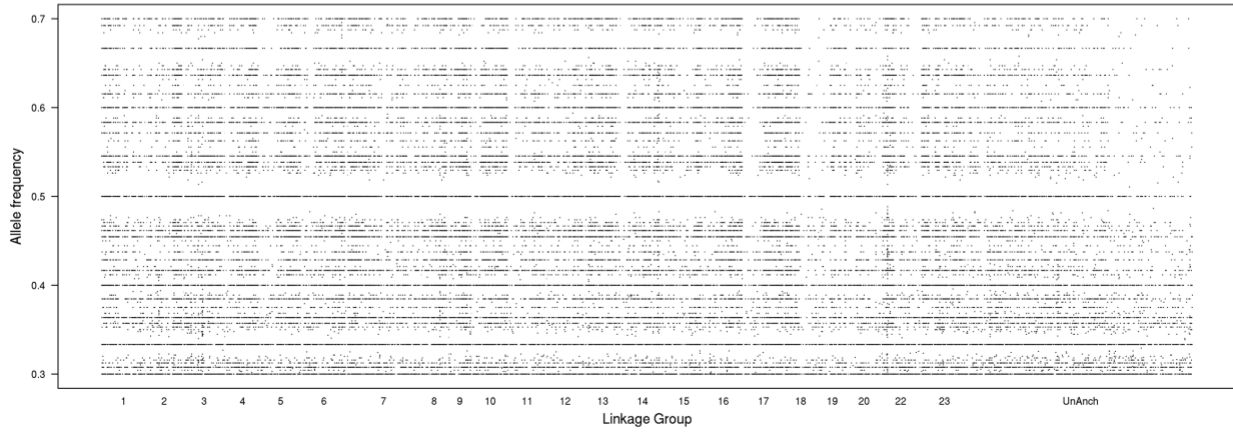

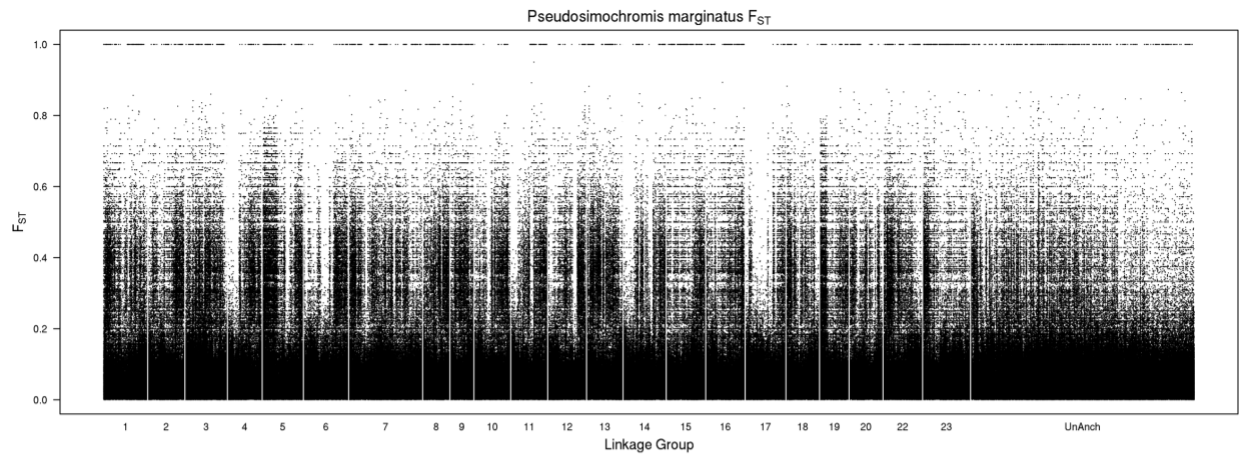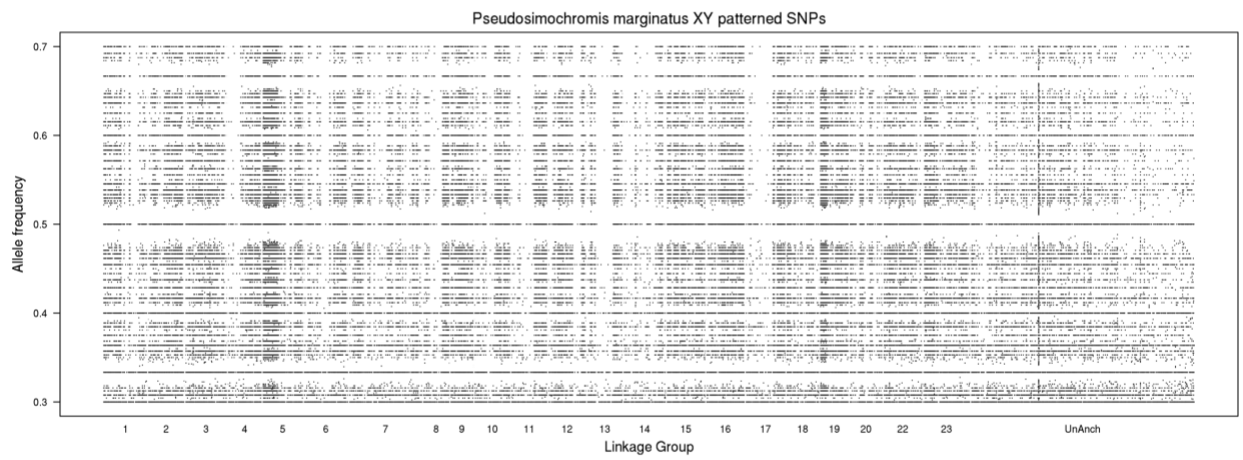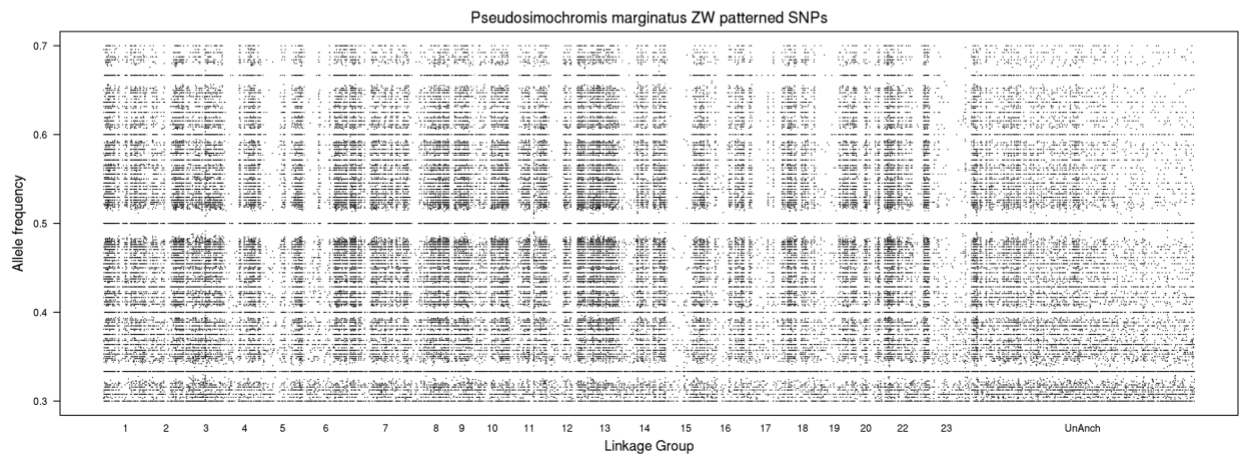

Supplement: 41598_2024_53021_MOESM2_ESM.pdf [file 41598_2024_53021_MOESM2_ESM.pdf]
