# Supplementary material for: Turnover of sex chromosomes in the Lake Tanganyika cichlid tribe Tropheini (Teleostei: Cichlidae)
Source: PubMed Central journal article supplement (PMC10828463; doi:10.1038/s41598-024-53021-3), 2024-01-30
Supplement: 41598_2024_53021_MOESM1_ESM.pdf [file 41598_2024_53021_MOESM1_ESM.pdf]

## Supplementary Tables and Figures

### Turnover of Sex Chromosomes in the Lake Tanganyika cichlid tribe Tropheini (Teleostei: *Cichlidae*)

**Kristen A. Behrens<sup>1</sup>, Holger Zimmermann<sup>2,3</sup>, Radim Blažek<sup>2</sup>, Martin Reichard<sup>2,4</sup>, Stephan Koblmüller<sup>3</sup>, Thomas D. Kocher<sup>1</sup>**

<sup>1</sup> Department of Biology, University of Maryland, College Park MD 20742 USA

<sup>2</sup> Czech Academy of Sciences, Institute of Vertebrate Biology, Květná 8, 603 00 Brno, Czech Republic

<sup>3</sup> Institute of Biology, University of Graz, Universitätsplatz 2, 8010 Graz, Austria

<sup>4</sup> Department of Ecology and Vertebrate Zoology, University of Łódź, Łódź, Poland

## Tables

Supplemental Table 1. Samples from the tribe *Tropheini*

| Species                                      | Sex | Number of Individuals | Mean Coverage | Collection Location   | Project Number |
|----------------------------------------------|-----|-----------------------|---------------|-----------------------|----------------|
| <i>Shuja horei</i>                           | M   | 1                     | 7.91          | Toby's Place          | PRJNA550295    |
| <i>Shuja horei</i>                           | F   | 1                     | 8.26          | Toby's Place          | PRJNA550295    |
| <i>Shuja horei</i> *                         | M   | 25                    | 41.76         | Kalambo Lodge, Zambia | PRJNA802233    |
| <i>Shuja horei</i> *                         | F   | 25                    | 49.82         | Kalambo Lodge, Zambia | PRJNA802233    |
| <i>Gnathochromis pfefferi</i>                | M   | 1                     | 7.49          | Toby's Place          | PRJNA550295    |
| <i>Gnathochromis pfefferi</i>                | F   | 1                     | 7.24          | Toby's Place          | PRJNA550295    |
| <i>Gnathochromis pfefferi</i> *              | M   | 23                    | 44.27         | Kalambo Lodge, Zambia | PRJNA802233    |
| <i>Gnathochromis pfefferi</i> *              | F   | 25                    | 45.94         | Kalambo Lodge, Zambia | PRJNA802233    |
| <i>Interochromis loocki</i>                  | M   | 1                     | 7.22          | Toby's Place          | PRJNA550295    |
| <i>Interochromis loocki</i>                  | F   | 1                     | 9.08          | Toby's Place          | PRJNA550295    |
| <i>Interochromis loocki</i> <sup>+</sup>     | M   | 3                     | NA            | Toby's Place          | PRJNA552202    |
| <i>Interochromis loocki</i> <sup>+</sup>     | F   | 3                     | NA            | Toby's Place          | PRJNA552202    |
| <i>Interochromis loocki</i> *                | M   | 24                    | 41.76         | Kalambo Lodge, Zambia | PRJNA802233    |
| <i>Interochromis loocki</i> *                | F   | 21                    | 41.33         | Kalambo Lodge, Zambia | PRJNA802233    |
| <i>Limnotilapia dardennii</i>                | M   | 1                     | 7.99          | Toby's Place          | PRJNA550295    |
| <i>Limnotilapia dardennii</i>                | F   | 1                     | 7.84          | Toby's Place          | PRJNA550295    |
| <i>Lobochilotes labiatus</i>                 | M   | 1                     | 7.57          | Toby's Place          | PRJNA550295    |
| <i>Lobochilotes labiatus</i>                 | F   | 1                     | 6.55          | Toby's Place          | PRJNA550295    |
| <i>Lobochilotes labiatus</i> <sup>+</sup>    | M   | 3                     | NA            | Toby's Place          | PRJNA552202    |
| <i>Lobochilotes labiatus</i> <sup>+</sup>    | F   | 3                     | NA            | Toby's Place          | PRJNA552202    |
| <i>Petrochromis famula</i>                   | M   | 1                     | 8.21          | Toby's Place          | PRJNA550295    |
| <i>Petrochromis famula</i>                   | F   | 1                     | 5.92          | Toby's Place          | PRJNA550295    |
| <i>Petrochromis famula</i> <sup>+</sup>      | M   | 3                     | NA            | Toby's Place          | PRJNA552202    |
| <i>Petrochromis famula</i> <sup>+</sup>      | F   | 3                     | NA            | Toby's Place          | PRJNA552202    |
| <i>Petrochromis fasciolatus</i>              | M   | 1                     | 8.00          | Toby's Place          | PRJNA550295    |
| <i>Petrochromis fasciolatus</i>              | F   | 1                     | 7.93          | Toby's Place          | PRJNA550295    |
| <i>Petrochromis fasciolatus</i> <sup>+</sup> | M   | 3                     | NA            | Toby's Place          | PRJNA552202    |
| <i>Petrochromis fasciolatus</i> <sup>+</sup> | F   | 3                     | NA            | Toby's Place          | PRJNA552202    |
| <i>Petrochromis horii</i>                    | M   | 1                     | 7.38          | Katete 3              | PRJNA550295    |
| <i>Petrochromis horii</i>                    | F   | 1                     | 9.71          | Katete 3              | PRJNA550295    |
| <i>Petrochromis macrognathus</i>             | M   | 1                     | 7.11          | Chituta               | PRJNA550295    |
| <i>Petrochromis macrognathus</i>             | F   | 1                     | 6.33          | Chituta               | PRJNA550295    |

|                                                       |   |   |       |                |             |
|-------------------------------------------------------|---|---|-------|----------------|-------------|
| <i>Petrochromis macrognathus</i> <sup>+</sup>         | M | 3 | NA    | Chituta        | PRJNA552202 |
| <i>Petrochromis macrognathus</i> <sup>+</sup>         | F | 3 | NA    | Chituta        | PRJNA552202 |
| <i>Petrochromis orthognathus</i>                      | M | 1 | 12.62 | Nyaruhongoka 2 | PRJNA550295 |
| <i>Petrochromis orthognathus</i>                      | F | 1 | 4.17  | Nyaruhongoka 2 | PRJNA550295 |
| <i>Petrochromis polyodon</i>                          | M | 1 | 7.76  | Toby's Place   | PRJNA550295 |
| <i>Petrochromis polyodon</i>                          | F | 1 | 7.83  | Toby's Place   | PRJNA550295 |
| <i>Petrochromis polyodon</i> <sup>+</sup>             | M | 3 | NA    | Toby's Place   | PRJNA552202 |
| <i>Petrochromis polyodon</i> <sup>+</sup>             | F | 3 | NA    | Toby's Place   | PRJNA552202 |
| <i>Petrochromis</i> sp. giant                         | M | 1 | 8.22  | Fulwe          | PRJNA550295 |
| <i>Petrochromis</i> sp. giant                         | F | 1 | 7.60  | Fulwe          | PRJNA550295 |
| <i>Petrochromis</i> sp. kazumbae                      | M | 1 | 8.63  | Kaku           | PRJNA550295 |
| <i>Petrochromis</i> sp. kazumbae                      | F | 1 | 8.39  | Kaku           | PRJNA550295 |
| <i>Petrochromis</i> sp. kipili brown                  | M | 1 | 6.50  | Fulwe          | PRJNA550295 |
| <i>Petrochromis</i> sp. kipili brown                  | F | 1 | 7.46  | Fulwe          | PRJNA550295 |
| <i>Petrochromis</i> sp. macrognathus rainbow          | M | 1 | 7.50  | Nkondwe        | PRJNA550295 |
| <i>Petrochromis</i> sp. macrognathus rainbow          | F | 1 | 7.58  | Nkondwe        | PRJNA550295 |
| <i>Petrochromis</i> sp. moshi yellow                  | M | 1 | 7.81  | Nganja         | PRJNA550295 |
| <i>Petrochromis</i> sp. moshi yellow                  | F | 1 | 7.27  | Nganja         | PRJNA550295 |
| <i>Petrochromis</i> sp. orthognathus Ikola            | M | 1 | 7.40  | Korongwe       | PRJNA550295 |
| <i>Petrochromis</i> sp. orthognathus Ikola            | F | 1 | 7.69  | Korongwe       | PRJNA550295 |
| <i>Petrochromis</i> sp. polyodon Texas                | M | 1 | 8.12  | Twiyu          | PRJNA550295 |
| <i>Petrochromis</i> sp. polyodon Texas                | F | 1 | 9.99  | Twiyu          | PRJNA550295 |
| <i>Petrochromis</i> sp. red                           | M | 1 | 6.50  | Kalila Nkwasi  | PRJNA550295 |
| <i>Petrochromis</i> sp. red                           | F | 1 | 6.53  | Kalila Nkwasi  | PRJNA550295 |
| <i>Petrochromis</i> trewasasae                        | M | 1 | 14.43 | Katete 2       | PRJNA550295 |
| <i>Petrochromis</i> trewasasae                        | F | 1 | 8.34  | Katete 2       | PRJNA550295 |
| <i>Petrochromis</i> trewasasae ephippium              | M | 1 | 8.21  | Toby's Place   | PRJNA550295 |
| <i>Petrochromis</i> trewasasae ephippium              | F | 1 | 7.44  | Toby's Place   | PRJNA550295 |
| <i>Petrochromis</i> trewasasae ephippium <sup>+</sup> | M | 3 | NA    | Toby's Place   | PRJNA552202 |

|                                                       |   |    |       |                       |             |
|-------------------------------------------------------|---|----|-------|-----------------------|-------------|
| <i>Petrochromis trewavasae ephippium</i> <sup>+</sup> | F | 3  | NA    | Toby's Place          | PRJNA552202 |
| <i>Pseudosimochromis babaulti</i>                     | M | 1  | 8.28  | Kitaza south          | PRJNA550295 |
| <i>Pseudosimochromis babaulti</i>                     | F | 1  | 12.68 | Kitaza south          | PRJNA550295 |
| <i>Pseudosimochromis babaulti</i> *                   | M | 25 | 46.21 | Kalambo Lodge, Zambia | PRJNA802233 |
| <i>Pseudosimochromis babaulti</i> *                   | F | 23 | 41.16 | Kalambo Lodge, Zambia | PRJNA802233 |
| <i>Pseudosimochromis babaulti South</i>               | M | 1  | 9.64  | Toby's Place          | PRJNA550295 |
| <i>Pseudosimochromis babaulti South</i>               | F | 1  | 9.62  | Toby's Place          | PRJNA550295 |
| <i>Pseudosimochromis curvifrons</i>                   | M | 1  | 9.90  | Toby's Place          | PRJNA550295 |
| <i>Pseudosimochromis curvifrons</i>                   | F | 1  | 9.07  | Toby's Place          | PRJNA550295 |
| <i>Pseudosimochromis marginatus</i>                   | M | 1  | 9.90  | Nyanza Lac            | PRJNA550295 |
| <i>Pseudosimochromis marginatus</i>                   | F | 1  | 15.20 | Nyanza Lac            | PRJNA550295 |
| <i>Pseudosimochromis marginatus North</i>             | M | 1  | 7.26  | Tembo Rock            | PRJNA550295 |
| <i>Pseudosimochromis marginatus North</i>             | F | 1  | 7.66  | Tembo Rock            | PRJNA550295 |
| <i>Simochromis diagramma</i>                          | M | 1  | 9.59  | Toby's Place          | PRJNA550295 |
| <i>Simochromis diagramma</i>                          | F | 1  | 10.21 | Toby's Place          | PRJNA550295 |
| <i>Simochromis diagramma</i> <sup>+</sup>             | M | 3  | NA    | Toby's Place          | PRJNA552202 |
| <i>Simochromis diagramma</i> <sup>+</sup>             | F | 3  | NA    | Toby's Place          | PRJNA552202 |
| <i>Simochromis diagramma</i> *                        | M | 20 | 47.08 | Captive full-sib      | PRJNA802233 |
| <i>Simochromis diagramma</i> *                        | F | 28 | 38.93 | Captive full-sib      | PRJNA802233 |
| <i>Tropheus annectens</i>                             | M | 1  | 14.12 | Mukamba               | PRJNA550295 |
| <i>Tropheus annectens</i>                             | F | 1  | 7.94  | Mukamba               | PRJNA550295 |
| <i>Tropheus brichardi</i>                             | M | 1  | 8.73  | Nyanza Lac            | PRJNA550295 |
| <i>Tropheus brichardi</i>                             | F | 1  | 8.69  | Nyanza Lac            | PRJNA550295 |
| <i>Tropheus duboisi</i>                               | M | 1  | 7.66  | Kaku                  | PRJNA550295 |
| <i>Tropheus duboisi</i>                               | F | 1  | 8.19  | Kaku                  | PRJNA550295 |
| <i>Tropheus moorii</i>                                | M | 1  | 6.83  | Mbita Island W        | PRJNA550295 |
| <i>Tropheus moorii</i>                                | F | 1  | 7.86  | Mbita Island W        | PRJNA550295 |
| <i>Tropheus moorii</i> <sup>+</sup>                   | M | 3  | NA    | Mbita Island W        | PRJNA552202 |
| <i>Tropheus moorii</i> <sup>+</sup>                   | F | 3  | NA    | Mbita Island W        | PRJNA552202 |
| <i>Tropheus polli</i>                                 | M | 1  | 11.96 | Storo 1               | PRJNA550295 |
| <i>Tropheus polli</i>                                 | F | 1  | 11.86 | Storo 1               | PRJNA550295 |
| <i>Tropheus sp. black</i>                             | M | 1  | 8.52  | Nyaruhongoka          | PRJNA550295 |
| <i>Tropheus sp. black</i>                             | F | 1  | 10.56 | Nyaruhongoka          | PRJNA550295 |

|                                      |   |    |       |                 |             |
|--------------------------------------|---|----|-------|-----------------|-------------|
| <i>Tropheus</i> sp. black*           | M | 30 | 12.03 | Ikola, Tanzania | PRJNA400462 |
| <i>Tropheus</i> sp. black*           | F | 24 | 12.88 | Ikola, Tanzania | PRJNA400462 |
| <i>Tropheus</i> sp. brichardi kipili | M | 1  | 7.41  | Nkondwe         | PRJNA550295 |
| <i>Tropheus</i> sp. brichardi kipili | F | 1  | 7.97  | Nkondwe         | PRJNA550295 |
| <i>Tropheus</i> sp. kirschfleck      | M | 1  | 7.38  | Nganja          | PRJNA550295 |
| <i>Tropheus</i> sp. kirschfleck      | F | 1  | 6.73  | Nganja          | PRJNA550295 |
| <i>Tropheus</i> sp. lukuga           | M | 1  | 11.91 | Katumbi         | PRJNA550295 |
| <i>Tropheus</i> sp. lukuga           | F | 1  | 7.40  | Katumbi         | PRJNA550295 |
| <i>Tropheus</i> sp. lunatus          | M | 1  | 7.51  | Cape Kabogo     | PRJNA550295 |
| <i>Tropheus</i> sp. lunatus          | F | 1  | 7.99  | Cape Kabogo     | PRJNA550295 |
| <i>Tropheus</i> sp. mpimbwe          | M | 1  | 7.17  | Korongwe        | PRJNA550295 |
| <i>Tropheus</i> sp. mpimbwe          | F | 1  | 6.42  | Korongwe        | PRJNA550295 |
| <i>Tropheus</i> sp. murago           | M | 1  | 7.74  | Wapembwe        | PRJNA550295 |
| <i>Tropheus</i> sp. murago           | F | 1  | 7.45  | Wapembwe        | PRJNA550295 |
| <i>Tropheus</i> sp. red              | M | 1  | 9.13  | Chimba          | PRJNA550295 |
| <i>Tropheus</i> sp. red              | F | 1  | 7.69  | Chimba          | PRJNA550295 |

\* pooled, + transcriptome

Supplemental Table 2. Compilation of all statistical results by species. Each species table contains all results obtained for that species and is divided into sub-categories. The sex-specific SNP test section designates calls made by visually inspecting the  $F_{ST}$  and allele frequency plots and was the first stage of our analysis. Blue cell fill indicates an XY signal, pink indicates a ZW signal, and purple indicates the presence of both XY and ZW signal. If transcriptome and/or pooled sequencing data for a species was available, the cells in these rows will not be blacked out. Following the sex-specific SNP test, the Kruskal-Wallis test was conducted to determine if the  $\log_2(XY:ZW)$  was significantly different between chromosomes, with a p-value cutoff of 0.05. If that test was significant, a post-hoc Dunn's test with correction for multiple testing was then conducted (ns = no significance, \* = 0.05, \*\* = 0.01, \*\*\* = 0.001, \*\*\*\* = 0.00001). After this, the Top 1% (# of windows per chromosome) was calculated, taking the top ~78 of 7800 windows, and the table contains the number of XY and ZW windows per chromosome that meet that criteria. Finally, mean per chromosome  $\log_2(XY:ZW)$  was calculated.

| <i>Tropheus duboisi</i>                              |                                                             | LG01        | LG02        | LG03       | LG04        | LG05        | LG06        | LG07       | LG08       | LG09        | LG10        | LG11        | LG12        | LG13        | LG14       | LG15        | LG16       | LG17        | LG18       | LG19        | LG20        | LG22       | LG23        |  |
|------------------------------------------------------|-------------------------------------------------------------|-------------|-------------|------------|-------------|-------------|-------------|------------|------------|-------------|-------------|-------------|-------------|-------------|------------|-------------|------------|-------------|------------|-------------|-------------|------------|-------------|--|
| Sex-specific SNP inspection                          | Individual                                                  |             |             |            |             |             |             |            |            |             |             |             |             |             |            |             |            |             |            |             |             |            |             |  |
|                                                      | Transcriptome                                               |             |             |            |             |             |             |            |            |             |             |             |             |             |            |             |            |             |            |             |             |            |             |  |
|                                                      | Pooled                                                      |             |             |            |             |             |             |            |            |             |             |             |             |             |            |             |            |             |            |             |             |            |             |  |
|                                                      | Kruskal-Wallis for heterogeneity among chromosomes, df = 21 |             |             |            |             |             |             |            |            |             |             |             |             |             |            |             |            |             |            |             |             |            |             |  |
|                                                      | 1M, 1F                                                      |             |             |            |             |             |             |            |            |             |             |             |             |             |            |             |            |             |            |             |             |            |             |  |
|                                                      | chi-squared = 157.65, p-value < 2.2e-16                     |             |             |            |             |             |             |            |            |             |             |             |             |             |            |             |            |             |            |             |             |            |             |  |
| Top 1% (# windows per chromosome)                    | 1M, 1F                                                      |             |             |            |             |             |             |            |            |             |             |             |             |             |            |             |            |             |            |             |             |            |             |  |
|                                                      | XV                                                          | 0           | 1           | 20         | 1           | 0           | 1           | 2          | 1          | 4           | 1           | 0           | 0           | 2           | 1          | 0           | 2          | 0           | 0          | 2           | 0           | 7          | 2           |  |
|                                                      | ZW                                                          | 0           | 2           | 10         | 2           | 0           | 0           | 0          | 0          | 0           | 4           | 0           | 0           | 0           | 0          | 1           | 0          | 0           | 3          | 1           | 0           | 7          | 1           |  |
| mean per chromosome log2(XY:ZW) ratio of SNP density |                                                             |             |             |            |             |             |             |            |            |             |             |             |             |             |            |             |            |             |            |             |             |            |             |  |
| Dunn's test to identify outlier chromosomes          | 1M, 1F                                                      | -0.13043767 | -0.02098196 | 0.04189163 | -0.20170328 | -0.18490863 | -0.20131224 | 0.03655278 | 0.00635136 | -1.30473234 | -0.39428705 | -0.02148442 | -0.21377555 | -0.45555536 | 0.06076278 | -0.11539525 | 0.10216061 | -0.06455976 | 0.00950557 | -0.12422104 | -2.01090796 | 0.05821307 | -0.31040839 |  |
|                                                      | LG01                                                        |             |             |            |             |             |             |            |            |             |             |             |             |             |            |             |            |             |            |             |             |            |             |  |
|                                                      | LG02                                                        | ns          |             |            |             |             |             |            |            |             |             |             |             |             |            |             |            |             |            |             |             |            |             |  |
|                                                      | LG03                                                        | ns          | ns          |            |             |             |             |            |            |             |             |             |             |             |            |             |            |             |            |             |             |            |             |  |
|                                                      | LG04                                                        | ns          | ns          | ns         |             |             |             |            |            |             |             |             |             |             |            |             |            |             |            |             |             |            |             |  |
|                                                      | LG05                                                        | ns          | ns          | ns         | ns          |             |             |            |            |             |             |             |             |             |            |             |            |             |            |             |             |            |             |  |
|                                                      | LG06                                                        | ns          | ns          | ns         | ns          | ns          |             |            |            |             |             |             |             |             |            |             |            |             |            |             |             |            |             |  |
|                                                      | LG07                                                        | ns          | ns          | ns         | ns          | ns          | ns          |            |            |             |             |             |             |             |            |             |            |             |            |             |             |            |             |  |
|                                                      | LG08                                                        | ns          | ns          | ns         | ns          | ns          | ns          | ns         |            |             |             |             |             |             |            |             |            |             |            |             |             |            |             |  |
|                                                      | LG09                                                        | ****        | ****        | ****       | ****        | ****        | ****        | ****       | ****       |             |             |             |             |             |            |             |            |             |            |             |             |            |             |  |
|                                                      | LG10                                                        | ns          | *           | **         | ns          | ns          | ns          | ***        | *          | ****        |             |             |             |             |            |             |            |             |            |             |             |            |             |  |
|                                                      | LG11                                                        | ns          | ns          | ns         | ns          | ns          | ns          | ns         | ns         | ****        | ns          |             |             |             |            |             |            |             |            |             |             |            |             |  |
|                                                      | LG12                                                        | ns          | ns          | ns         | ns          | ns          | ns          | ns         | ns         | ****        | ns          |             |             |             |            |             |            |             |            |             |             |            |             |  |
|                                                      | LG13                                                        | ns          | *           | **         | ns          | ns          | ns          | ***        | *          | ****        | ns          | *           | ns          |             |            |             |            |             |            |             |             |            |             |  |
|                                                      | LG14                                                        | ns          | ns          | ns         | ns          | ns          | ns          | ns         | ns         | ****        | **          | ns          | ns          | **          |            |             |            |             |            |             |             |            |             |  |
|                                                      | LG15                                                        | ns          | ns          | ns         | ns          | ns          | ns          | ns         | ns         | ****        | ns          | ns          | ns          | ns          | ns         |             |            |             |            |             |             |            |             |  |
|                                                      | LG16                                                        | ns          | ns          | ns         | ns          | ns          | *           | ns         | ns         | ****        | ***         | ns          | ns          | ***         | ns         | ns          |            |             |            |             |             |            |             |  |
|                                                      | LG17                                                        | ns          | ns          | ns         | ns          | ns          | ns          | ns         | ns         | ****        | *           | ns          | ns          | *           | ns         | ns          | ns         |             |            |             |             |            |             |  |
|                                                      | LG18                                                        | ns          | ns          | ns         | ns          | ns          | ns          | ns         | ns         | ****        | *           | ns          | ns          | *           | ns         | ns          | ns         | ns          |            |             |             |            |             |  |
|                                                      | LG19                                                        | ns          | ns          | ns         | ns          | ns          | ns          | ns         | ns         | ****        | ns          | ns          | ns          | ns          | ns         | ns          | ns         | ns          | ns         |             |             |            |             |  |
|                                                      | LG20                                                        | ns          | ns          | ns         | ns          | ns          | ns          | ns         | ns         | ****        | ns          | ns          | ns          | ns          | ns         | ns          | ns         | ns          | ns         | ns          |             |            |             |  |
|                                                      | LG22                                                        | ns          | ns          | ns         | ns          | ns          | ns          | ns         | ns         | ****        | **          | ns          | ns          | **          | ns         | ns          | ns         | ns          | ns         | ns          | ns          |            |             |  |
|                                                      | LG23                                                        | ns          | ns          | *          | ns          | ns          | ns          | **         | ns         | ****        | ns          | ns          | ns          | ns          | *          | ns          | **         | ns          | ns         | ns          | ns          | ns         | *           |  |

| <i>Tropheus sp. 'black'</i>                                        |                                         | LG01        | LG02        | LG03        | LG04       | LG05        | LG06        | LG07       | LG08        | LG09        | LG10       | LG11       | LG12        | LG13        | LG14        | LG15        | LG16        | LG17        | LG18        | LG19       | LG20        | LG22        | LG23        |      |
|--------------------------------------------------------------------|-----------------------------------------|-------------|-------------|-------------|------------|-------------|-------------|------------|-------------|-------------|------------|------------|-------------|-------------|-------------|-------------|-------------|-------------|-------------|------------|-------------|-------------|-------------|------|
| <b>Sex-specific SNP inspection</b>                                 |                                         |             |             |             |            |             |             |            |             |             |            |            |             |             |             |             |             |             |             |            |             |             |             |      |
| Individual                                                         | 1M, 1F                                  |             |             |             |            |             |             |            |             |             |            |            |             |             |             |             |             |             |             |            |             |             |             |      |
| Transcriptome                                                      |                                         |             |             |             |            |             |             |            |             |             |            |            |             |             |             |             |             |             |             |            |             |             |             |      |
| Pooled                                                             | 20M, 24F                                |             |             |             |            |             |             |            |             |             |            |            |             |             |             |             |             |             |             |            |             |             |             |      |
| <b>Kruskal-Wallis for heterogeneity among chromosomes, df = 21</b> |                                         |             |             |             |            |             |             |            |             |             |            |            |             |             |             |             |             |             |             |            |             |             |             |      |
|                                                                    | 1M, 1F                                  |             |             |             |            |             |             |            |             |             |            |            |             |             |             |             |             |             |             |            |             |             |             |      |
|                                                                    | chi-squared = 429.45, p-value < 2.2e-16 |             |             |             |            |             |             |            |             |             |            |            |             |             |             |             |             |             |             |            |             |             |             |      |
|                                                                    | 20M, 24F                                |             |             |             |            |             |             |            |             |             |            |            |             |             |             |             |             |             |             |            |             |             |             |      |
|                                                                    | chi-squared = 439.16, p-value < 2.2e-16 |             |             |             |            |             |             |            |             |             |            |            |             |             |             |             |             |             |             |            |             |             |             |      |
| <b># windows per chromosome</b>                                    |                                         |             |             |             |            |             |             |            |             |             |            |            |             |             |             |             |             |             |             |            |             |             |             |      |
|                                                                    | 1M, 1F                                  |             |             |             |            |             |             |            |             |             |            |            |             |             |             |             |             |             |             |            |             |             |             |      |
| XY                                                                 |                                         | 0           | 0           | 0           | 0          | 0           | 0           | 0          | 0           | 0           | 0          | 0          | 0           | 0           | 0           | 0           | 0           | 0           | 0           | 0          | 77          | 0           | 0           | 0    |
| ZW                                                                 |                                         | 0           | 0           | 0           | 0          | 0           | 0           | 0          | 0           | 0           | 0          | 0          | 0           | 0           | 0           | 0           | 0           | 0           | 0           | 0          | 0           | 0           | 0           | 0    |
|                                                                    | 20M, 24F                                |             |             |             |            |             |             |            |             |             |            |            |             |             |             |             |             |             |             |            |             |             |             |      |
| XY                                                                 |                                         | 0           | 0           | 0           | 0          | 0           | 0           | 0          | 0           | 0           | 0          | 0          | 0           | 0           | 0           | 0           | 0           | 0           | 0           | 0          | 78          | 0           | 0           | 0    |
| ZW                                                                 |                                         | 0           | 0           | 0           | 0          | 0           | 0           | 0          | 0           | 0           | 0          | 0          | 0           | 0           | 0           | 0           | 0           | 0           | 0           | 0          | 0           | 0           | 0           | 0    |
| <b>mean per chromosome log2(XY:ZW) ratio of SNP density</b>        |                                         |             |             |             |            |             |             |            |             |             |            |            |             |             |             |             |             |             |             |            |             |             |             |      |
|                                                                    | 1M, 1F                                  | -0.08554637 | -0.17234594 | 0.04418953  | 0.25320214 | -0.16731544 | -0.09357618 | 0.16057239 | -0.32166867 | -0.07831161 | 0.02813864 | 0.22868056 | -0.07860554 | -0.09772872 | -0.16054374 | -0.1771118  | -0.08682522 | -0.05911453 | -0.5471318  | 4.30140868 | -0.05447771 | 0.09889549  | 0.12710707  |      |
|                                                                    | 20M, 24F                                | -0.02992809 | -0.01284525 | -0.15409282 | 0.0771982  | -0.02536538 | -0.00094101 | 0.0014581  | 0.0203157   | -0.06343691 | -0.0080497 | 0.05016465 | -0.15639729 | -0.03779538 | -0.04243594 | -0.01090799 | -0.00940034 | 0.05682711  | -0.14350464 | 4.57360258 | -0.02330661 | -0.00485796 | -0.04942742 |      |
| <b>Dunn's test to identify outlier chromosomes</b>                 |                                         |             |             |             |            |             |             |            |             |             |            |            |             |             |             |             |             |             |             |            |             |             |             |      |
|                                                                    | 1M, 1F                                  |             |             |             |            |             |             |            |             |             |            |            |             |             |             |             |             |             |             |            |             |             |             |      |
|                                                                    | LG01                                    |             |             |             |            |             |             |            |             |             |            |            |             |             |             |             |             |             |             |            |             |             |             |      |
|                                                                    | LG02                                    | ns          |             |             |            |             |             |            |             |             |            |            |             |             |             |             |             |             |             |            |             |             |             |      |
|                                                                    | LG03                                    | ns          | ns          |             |            |             |             |            |             |             |            |            |             |             |             |             |             |             |             |            |             |             |             |      |
|                                                                    | LG04                                    | ns          | ns          | ns          |            |             |             |            |             |             |            |            |             |             |             |             |             |             |             |            |             |             |             |      |
|                                                                    | LG05                                    | ns          | *           | ns          | **         |             |             |            |             |             |            |            |             |             |             |             |             |             |             |            |             |             |             |      |
|                                                                    | LG06                                    | ns          | ns          | ns          | *          | ns          |             |            |             |             |            |            |             |             |             |             |             |             |             |            |             |             |             |      |
|                                                                    | LG07                                    | ns          | ns          | ns          | ns         | *           | ns          |            |             |             |            |            |             |             |             |             |             |             |             |            |             |             |             |      |
|                                                                    | LG08                                    | ns          | **          | ns          | **         | ns          | ns          | **         |             |             |            |            |             |             |             |             |             |             |             |            |             |             |             |      |
|                                                                    | LG09                                    | ns          | ns          | ns          | ns         | ns          | ns          | ns         | ns          |             |            |            |             |             |             |             |             |             |             |            |             |             |             |      |
|                                                                    | LG10                                    | ns          | ns          | ns          | ns         | ns          | ns          | ns         | ns          | ns          |            |            |             |             |             |             |             |             |             |            |             |             |             |      |
|                                                                    | LG11                                    | ns          | ns          | ns          | ns         | **          | *           | ns         | **          | ns          | ns         |            |             |             |             |             |             |             |             |            |             |             |             |      |
|                                                                    | LG12                                    | ns          | ns          | ns          | ns         | ns          | ns          | ns         | ns          | ns          | ns         | ns         |             |             |             |             |             |             |             |            |             |             |             |      |
|                                                                    | LG13                                    | ns          | ns          | ns          | ns         | ns          | ns          | ns         | ns          | ns          | ns         | ns         | ns          |             |             |             |             |             |             |            |             |             |             |      |
|                                                                    | LG14                                    | ns          | *           | ns          | *          | ns          | ns          | *          | ns          | ns          | ns         | *          | ns          | ns          |             |             |             |             |             |            |             |             |             |      |
|                                                                    | LG15                                    | ns          | *           | ns          | **         | ns          | ns          | *          | ns          | ns          | ns         | **         | ns          | ns          | ns          |             |             |             |             |            |             |             |             |      |
|                                                                    | LG16                                    | ns          | ns          | ns          | *          | ns          | ns          | ns         | ns          | ns          | ns         | *          | ns          | ns          | ns          | ns          |             |             |             |            |             |             |             |      |
|                                                                    | LG17                                    | ns          | ns          | ns          | ns         | ns          | ns          | ns         | ns          | ns          | ns         | ns         | ns          | ns          | ns          | ns          | ns          |             |             |            |             |             |             |      |
|                                                                    | LG18                                    | *           | ****        | **          | ****       | ns          | *           | ****       | ns          | *           | **         | ****       | *           | *           | ns          | ns          | *           | *           |             |            |             |             |             |      |
|                                                                    | LG19                                    | ****        | ****        | ****        | ****       | ****        | ****        | ****       | ****        | ****        | ****       | ****       | ****        | ****        | ****        | ****        | ****        | ****        | ****        | ****       | ****        | ****        | ****        | **** |
|                                                                    | LG20                                    | ns          | ns          | ns          | ns         | **          | *           | ns         | **          | ns          | ns         | ns         | ns          | ns          | *           | **          | *           | ns          | ****        | ****       | ****        | ****        | ****        |      |
|                                                                    | LG22                                    | ns          | ns          | ns          | *          | ns          | ns          | ns         | ns          | ns          | ns         | *          | ns          | ns          | ns          | ns          | ns          | ns          | ns          | ****       | ****        | *           | ****        |      |
|                                                                    | LG23                                    | ns          | ns          | ns          | ns         | ns          | ns          | ns         | *           | ns          | ns         | ns         | ns          | ns          | ns          | ns          | ns          | ns          | ****        | ****       | ns          | ns          | ****        |      |
| <b>Dunn's test to identify outlier chromosomes</b>                 |                                         |             |             |             |            |             |             |            |             |             |            |            |             |             |             |             |             |             |             |            |             |             |             |      |
|                                                                    | 20M, 24F                                |             |             |             |            |             |             |            |             |             |            |            |             |             |             |             |             |             |             |            |             |             |             |      |
|                                                                    | LG01                                    |             |             |             |            |             |             |            |             |             |            |            |             |             |             |             |             |             |             |            |             |             |             |      |
|                                                                    | LG02                                    | ns          |             |             |            |             |             |            |             |             |            |            |             |             |             |             |             |             |             |            |             |             |             |      |
|                                                                    | LG03                                    | ns          | ns          |             |            |             |             |            |             |             |            |            |             |             |             |             |             |             |             |            |             |             |             |      |
|                                                                    | LG04                                    | ns          | ns          | ns          |            |             |             |            |             |             |            |            |             |             |             |             |             |             |             |            |             |             |             |      |
|                                                                    | LG05                                    | ns          | ns          | ns          | ns         |             |             |            |             |             |            |            |             |             |             |             |             |             |             |            |             |             |             |      |
|                                                                    | LG06                                    | ns          | ns          | ns          | ns         | ns          |             |            |             |             |            |            |             |             |             |             |             |             |             |            |             |             |             |      |
|                                                                    | LG07                                    | ns          | ns          | ns          | ns         | ns          | ns          |            |             |             |            |            |             |             |             |             |             |             |             |            |             |             |             |      |
|                                                                    | LG08                                    | ns          | ns          | ns          | ns         | ns          | ns          | ns         |             |             |            |            |             |             |             |             |             |             |             |            |             |             |             |      |
|                                                                    | LG09                                    | ns          | ns          | ns          | ns         | ns          | ns          | ns         | ns          |             |            |            |             |             |             |             |             |             |             |            |             |             |             |      |
|                                                                    | LG10                                    | ns          | ns          | ns          | ns         | ns          | ns          | ns         | ns          | ns          |            |            |             |             |             |             |             |             |             |            |             |             |             |      |
|                                                                    | LG11                                    | ns          | ns          | ns          | ns         | ns          | ns          | ns         | ns          | ns          | ns         |            |             |             |             |             |             |             |             |            |             |             |             |      |
|                                                                    | LG12                                    | ns          | ns          | ns          | ns         | ns          | ns          | ns         | ns          | ns          | ns         | ns         |             |             |             |             |             |             |             |            |             |             |             |      |
|                                                                    | LG13                                    | ns          | ns          | ns          | ns         | ns          | ns          | ns         | ns          | ns          | ns         | ns         | ns          |             |             |             |             |             |             |            |             |             |             |      |
|                                                                    | LG14                                    | ns          | ns          | ns          | ns         | ns          | ns          | ns         | ns          | ns          | ns         | ns         | ns          | ns          |             |             |             |             |             |            |             |             |             |      |
|                                                                    | LG15                                    | ns          | ns          | ns          | ns         | ns          | ns          | ns         | ns          | ns          | ns         | ns         | ns          | ns          | ns          |             |             |             |             |            |             |             |             |      |
|                                                                    | LG16                                    | ns          | ns          | ns          | ns         | ns          | ns          | ns         | ns          | ns          | ns         | ns         | ns          | ns          | ns          | ns          |             |             |             |            |             |             |             |      |
|                                                                    | LG17                                    | ns          | ns          | ns          | ns         | ns          | ns          | ns         | ns          | ns          | ns         | ns         | ns          | ns          | ns          | ns          | ns          |             |             |            |             |             |             |      |
|                                                                    | LG18                                    | ns          | ns          | ns          | ns         | ns          | ns          | ns         | ns          | ns          | ns         | ns         | ns          | ns          | ns          | ns          | ns          | ns          |             |            |             |             |             |      |
|                                                                    | LG19                                    | ****        | ****        | ****        | ****       | ****        | ****        | ****       | ****        | ****        | ****       | ****       | ****        | ****        | ****        | ****        | ****        | ****        | ****        | ****       | ****        | ****        | ****        | **** |
|                                                                    | LG20                                    | ns          | ns          | ns          | ns         | ns          | ns          | ns         | ns          | ns          | ns         | ns         | ns          | ns          | ns          | ns          | ns          | ns          | ns          | ****       | ****        | ****        | ****        | **** |
|                                                                    | LG22                                    | ns          | ns          | ns          | ns         | ns          | ns          | ns         | ns          | ns          | ns         | ns         | ns          | ns          | ns          | ns          | ns          | ns          | ns          | ****       | ****        | ****        | ****        | **** |
|                                                                    | LG23                                    | ns          | ns          | ns          | ns         | ns          | ns          | ns         | ns          | ns          | ns         | ns         | ns          | ns          | ns          | ns          | ns          | ns          | ns          | ****       | ****        | ****        | ****        | **** |

| <i>Tropheus sp. 'kirschfleck'</i>                           |        | LG01        | LG02       | LG03        | LG04        | LG05       | LG06        | LG07        | LG08        | LG09        | LG10        | LG11       | LG12        | LG13       | LG14        | LG15       | LG16       | LG17        | LG18       | LG19       | LG20        | LG22        | LG23       |      |
|-------------------------------------------------------------|--------|-------------|------------|-------------|-------------|------------|-------------|-------------|-------------|-------------|-------------|------------|-------------|------------|-------------|------------|------------|-------------|------------|------------|-------------|-------------|------------|------|
| Sex-specific SNP inspection                                 |        |             |            |             |             |            |             |             |             |             |             |            |             |            |             |            |            |             |            |            |             |             |            |      |
| Individual                                                  | 1M, 1F |             |            |             |             |            |             |             |             |             |             |            |             |            |             |            |            |             |            |            |             |             |            |      |
| Transcriptome                                               |        |             |            |             |             |            |             |             |             |             |             |            |             |            |             |            |            |             |            |            |             |             |            |      |
| Pooled                                                      |        |             |            |             |             |            |             |             |             |             |             |            |             |            |             |            |            |             |            |            |             |             |            |      |
| Kruskal-Wallis for heterogeneity among chromosomes, df = 21 |        |             |            |             |             |            |             |             |             |             |             |            |             |            |             |            |            |             |            |            |             |             |            |      |
| 1M, 1F                                                      |        |             |            |             |             |            |             |             |             |             |             |            |             |            |             |            |            |             |            |            |             |             |            |      |
| chi-squared = 542.35, p-value < 2.2e-16                     |        |             |            |             |             |            |             |             |             |             |             |            |             |            |             |            |            |             |            |            |             |             |            |      |
| Top 1% (# windows per chromosome)                           |        |             |            |             |             |            |             |             |             |             |             |            |             |            |             |            |            |             |            |            |             |             |            |      |
| 1M, 1F                                                      |        |             |            |             |             |            |             |             |             |             |             |            |             |            |             |            |            |             |            |            |             |             |            |      |
| XY                                                          |        | 0           | 0          | 0           | 0           | 0          | 1           | 0           | 0           | 0           | 0           | 0          | 0           | 0          | 0           | 0          | 0          | 0           | 0          | 0          | 79          | 0           | 0          | 0    |
| ZW                                                          |        | 0           | 0          | 0           | 0           | 0          | 0           | 0           | 0           | 0           | 0           | 0          | 0           | 0          | 0           | 0          | 0          | 0           | 0          | 0          | 0           | 0           | 0          | 1    |
| mean per chromosome log2(XY:ZW) ratio of SNP density        |        |             |            |             |             |            |             |             |             |             |             |            |             |            |             |            |            |             |            |            |             |             |            |      |
| 1M, 1F                                                      |        | -0.36236962 | 0.02216785 | -0.05554885 | -0.00831248 | 0.01167358 | -0.05548058 | -0.03469078 | -0.25245795 | -0.06675745 | -0.21441717 | 0.00088941 | -0.25125035 | 0.14640852 | -0.05505821 | 0.08947661 | 0.16187534 | -0.08489218 | -0.0170177 | 3.27606044 | -0.55829555 | -0.51259759 | 0.01761948 |      |
| Dunn's test to identify outlier chromosomes                 |        |             |            |             |             |            |             |             |             |             |             |            |             |            |             |            |            |             |            |            |             |             |            |      |
| 1M, 1F                                                      |        |             |            |             |             |            |             |             |             |             |             |            |             |            |             |            |            |             |            |            |             |             |            |      |
| LG01                                                        |        |             |            |             |             |            |             |             |             |             |             |            |             |            |             |            |            |             |            |            |             |             |            |      |
| LG02                                                        |        | **          |            |             |             |            |             |             |             |             |             |            |             |            |             |            |            |             |            |            |             |             |            |      |
| LG03                                                        |        | **          | ns         |             |             |            |             |             |             |             |             |            |             |            |             |            |            |             |            |            |             |             |            |      |
| LG04                                                        |        | **          | ns         | ns          |             |            |             |             |             |             |             |            |             |            |             |            |            |             |            |            |             |             |            |      |
| LG05                                                        |        | **          | ns         | ns          | ns          |            |             |             |             |             |             |            |             |            |             |            |            |             |            |            |             |             |            |      |
| LG06                                                        |        | *           | ns         | ns          | ns          | ns         |             |             |             |             |             |            |             |            |             |            |            |             |            |            |             |             |            |      |
| LG07                                                        |        | **          | ns         | ns          | ns          | ns         | ns          |             |             |             |             |            |             |            |             |            |            |             |            |            |             |             |            |      |
| LG08                                                        |        | ns          | ns         | ns          | ns          | ns         | ns          | ns          |             |             |             |            |             |            |             |            |            |             |            |            |             |             |            |      |
| LG09                                                        |        | ns          | ns         | ns          | ns          | ns         | ns          | ns          | ns          |             |             |            |             |            |             |            |            |             |            |            |             |             |            |      |
| LG10                                                        |        | ns          | ns         | ns          | ns          | ns         | ns          | ns          | ns          | ns          |             |            |             |            |             |            |            |             |            |            |             |             |            |      |
| LG11                                                        |        | **          | ns         | ns          | ns          | ns         | ns          | ns          | ns          | ns          | ns          |            |             |            |             |            |            |             |            |            |             |             |            |      |
| LG12                                                        |        | ns          | ns         | ns          | ns          | ns         | ns          | ns          | ns          | ns          | ns          | ns         |             |            |             |            |            |             |            |            |             |             |            |      |
| LG13                                                        |        | ****        | ns         | ns          | ns          | ns         | ns          | ns          | **          | ns          | **          | ns         | **          |            |             |            |            |             |            |            |             |             |            |      |
| LG14                                                        |        | **          | ns         | ns          | ns          | ns         | ns          | ns          | ns          | ns          | ns          | ns         | ns          | ns         |             |            |            |             |            |            |             |             |            |      |
| LG15                                                        |        | ***         | ns         | ns          | ns          | ns         | ns          | ns          | ns          | ns          | *           | ns         | *           | ns         | ns          |            |            |             |            |            |             |             |            |      |
| LG16                                                        |        | ****        | ns         | ns          | ns          | ns         | ns          | ns          | **          | ns          | **          | ns         | **          | ns         | ns          | ns         |            |             |            |            |             |             |            |      |
| LG17                                                        |        | *           | ns         | ns          | ns          | ns         | ns          | ns          | ns          | ns          | ns          | ns         | ns          | ns         | ns          | ns         | ns         |             |            |            |             |             |            |      |
| LG18                                                        |        | **          | ns         | ns          | ns          | ns         | ns          | ns          | ns          | ns          | ns          | ns         | ns          | ns         | ns          | ns         | ns         | ns          |            |            |             |             |            |      |
| LG19                                                        |        | ****        | ****       | ****        | ****        | ****       | ****        | ****        | ****        | ****        | ****        | ****       | ****        | ****       | ****        | ****       | ****       | ****        | ****       | ****       | ****        | ****        | ****       | **** |
| LG20                                                        |        | ****        | ****       | ****        | ****        | ****       | ****        | ****        | ****        | ****        | ****        | ****       | ****        | ****       | ****        | ****       | ****       | ****        | ****       | ****       | ****        | ****        | ****       | **** |
| LG22                                                        |        | ns          | ns         | ns          | ns          | ns         | ns          | ns          | ns          | ns          | ns          | ns         | ns          | ns         | ns          | ns         | *          | ns          | ns         | ns         | ****        | ****        | ****       | **** |
| LG23                                                        |        | ***         | ns         | ns          | ns          | ns         | ns          | ns          | ns          | ns          | *           | ns         | *           | ns         | ns          | ns         | ns         | ns          | ns         | ns         | ****        | ****        | ****       | **** |





| <i>Tropheus sp. 'brichardi kipili'</i>                      |        | LG01       | LG02        | LG03        | LG04       | LG05       | LG06      | LG07        | LG08        | LG09       | LG10        | LG11       | LG12       | LG13       | LG14       | LG15        | LG16        | LG17       | LG18       | LG19       | LG20       | LG22        | LG23        |
|-------------------------------------------------------------|--------|------------|-------------|-------------|------------|------------|-----------|-------------|-------------|------------|-------------|------------|------------|------------|------------|-------------|-------------|------------|------------|------------|------------|-------------|-------------|
| Sex-specific SNP inspection                                 |        |            |             |             |            |            |           |             |             |            |             |            |            |            |            |             |             |            |            |            |            |             |             |
| Individual                                                  | 1M, 1F |            |             |             |            |            |           |             |             |            |             |            |            |            |            |             |             |            |            |            |            |             |             |
| Transcriptome                                               |        |            |             |             |            |            |           |             |             |            |             |            |            |            |            |             |             |            |            |            |            |             |             |
| Pooled                                                      |        |            |             |             |            |            |           |             |             |            |             |            |            |            |            |             |             |            |            |            |            |             |             |
| Kruskal-Wallis for heterogeneity among chromosomes, df = 21 |        |            |             |             |            |            |           |             |             |            |             |            |            |            |            |             |             |            |            |            |            |             |             |
|                                                             | 1M, 1F |            |             |             |            |            |           |             |             |            |             |            |            |            |            |             |             |            |            |            |            |             |             |
|                                                             |        |            |             |             |            |            |           |             |             |            |             |            |            |            |            |             |             |            |            |            |            |             |             |
|                                                             |        |            |             |             |            |            |           |             |             |            |             |            |            |            |            |             |             |            |            |            |            |             |             |
|                                                             |        |            |             |             |            |            |           |             |             |            |             |            |            |            |            |             |             |            |            |            |            |             |             |
| Top 1% (# windows per chromosome)                           |        |            |             |             |            |            |           |             |             |            |             |            |            |            |            |             |             |            |            |            |            |             |             |
|                                                             | 1M, 1F |            |             |             |            |            |           |             |             |            |             |            |            |            |            |             |             |            |            |            |            |             |             |
| XY                                                          |        | 0          | 2           | 12          | 2          | 1          | 1         | 1           | 0           | 1          | 1           | 2          | 1          | 1          | 0          | 4           | 1           | 0          | 1          | 1          | 0          | 6           | 4           |
| ZW                                                          |        | 0          | 3           | 10          | 2          | 1          | 0         | 0           | 0           | 0          | 1           | 0          | 1          | 0          | 2          | 1           | 0           | 4          | 1          | 0          | 4          | 1           |             |
| mean per chromosome log2(XY:ZW) ratio of SNP density        |        |            |             |             |            |            |           |             |             |            |             |            |            |            |            |             |             |            |            |            |            |             |             |
|                                                             | 1M, 1F | 0.04494021 | -0.08239958 | -0.18545075 | 0.00929338 | 0.12157545 | 0.0608576 | -0.00219919 | -0.05833592 | 0.12669884 | -0.01107006 | 0.02021002 | 0.09715911 | 0.05263295 | 0.12646693 | -0.10292322 | -0.02895293 | 0.05160238 | 0.01865813 | 0.03698563 | 0.42677466 | -0.04702307 | -0.05983891 |

| <i>Tropheus sp. 'lukuga'</i>                                |  | LG01       | LG02       | LG03        | LG04        | LG05        | LG06       | LG07        | LG08       | LG09       | LG10       | LG11        | LG12       | LG13       | LG14       | LG15        | LG16       | LG17       | LG18        | LG19       | LG20       | LG22       | LG23        |      |
|-------------------------------------------------------------|--|------------|------------|-------------|-------------|-------------|------------|-------------|------------|------------|------------|-------------|------------|------------|------------|-------------|------------|------------|-------------|------------|------------|------------|-------------|------|
| Sex-specific SNP inspection                                 |  |            |            |             |             |             |            |             |            |            |            |             |            |            |            |             |            |            |             |            |            |            |             |      |
| Individual                                                  |  | 1M, 1F     |            |             |             |             |            |             |            |            |            |             |            |            |            |             |            |            |             |            |            |            |             |      |
| Transcriptome                                               |  |            |            |             |             |             |            |             |            |            |            |             |            |            |            |             |            |            |             |            |            |            |             |      |
| Pooled                                                      |  |            |            |             |             |             |            |             |            |            |            |             |            |            |            |             |            |            |             |            |            |            |             |      |
| Kruskal-Wallis for heterogeneity among chromosomes, df = 21 |  |            |            |             |             |             |            |             |            |            |            |             |            |            |            |             |            |            |             |            |            |            |             |      |
| 1M, 1F                                                      |  |            |            |             |             |             |            |             |            |            |            |             |            |            |            |             |            |            |             |            |            |            |             |      |
| chi-squared = 413.56, p-value < 2.2e-16                     |  |            |            |             |             |             |            |             |            |            |            |             |            |            |            |             |            |            |             |            |            |            |             |      |
| Top 1% (# windows per chromosome)                           |  |            |            |             |             |             |            |             |            |            |            |             |            |            |            |             |            |            |             |            |            |            |             |      |
| 1M, 1F                                                      |  |            |            |             |             |             |            |             |            |            |            |             |            |            |            |             |            |            |             |            |            |            |             |      |
| XY                                                          |  | 0          | 0          | 0           | 0           | 0           | 0          | 0           | 0          | 0          | 0          | 0           | 0          | 0          | 0          | 0           | 0          | 0          | 0           | 0          | 77         | 0          | 0           | 0    |
| ZW                                                          |  | 0          | 0          | 0           | 0           | 0           | 0          | 0           | 0          | 0          | 0          | 0           | 0          | 0          | 0          | 0           | 0          | 0          | 0           | 0          | 0          | 0          | 0           | 0    |
| mean per chromosome log2(XY:ZW) ratio of SNP density        |  |            |            |             |             |             |            |             |            |            |            |             |            |            |            |             |            |            |             |            |            |            |             |      |
| 1M, 1F                                                      |  | -0.2143055 | 0.12839056 | -0.04183341 | -0.29444731 | -0.13972654 | 0.11880139 | -0.16763066 | 0.13471252 | -0.1665919 | 0.06463222 | -0.10280812 | 0.18244299 | 0.03713607 | 0.09476374 | -0.08301923 | 0.28809133 | 0.37658382 | -0.00837791 | 3.51481511 | 0.02531723 | 0.06968185 | -0.10784541 |      |
| Dunn's test to identify outlier chromosomes                 |  |            |            |             |             |             |            |             |            |            |            |             |            |            |            |             |            |            |             |            |            |            |             |      |
| 1M, 1F                                                      |  |            |            |             |             |             |            |             |            |            |            |             |            |            |            |             |            |            |             |            |            |            |             |      |
| LG01                                                        |  |            |            |             |             |             |            |             |            |            |            |             |            |            |            |             |            |            |             |            |            |            |             |      |
| LG02                                                        |  | ns         |            |             |             |             |            |             |            |            |            |             |            |            |            |             |            |            |             |            |            |            |             |      |
| LG03                                                        |  | ns         | ns         |             |             |             |            |             |            |            |            |             |            |            |            |             |            |            |             |            |            |            |             |      |
| LG04                                                        |  | ns         | **         | ns          |             |             |            |             |            |            |            |             |            |            |            |             |            |            |             |            |            |            |             |      |
| LG05                                                        |  | ns         | ns         | ns          | ns          |             |            |             |            |            |            |             |            |            |            |             |            |            |             |            |            |            |             |      |
| LG06                                                        |  | ns         | ns         | ns          | *           | ns          |            |             |            |            |            |             |            |            |            |             |            |            |             |            |            |            |             |      |
| LG07                                                        |  | ns         | ns         | ns          | ns          | ns          |            |             |            |            |            |             |            |            |            |             |            |            |             |            |            |            |             |      |
| LG08                                                        |  | ns         | ns         | ns          | *           | ns          | ns         |             |            |            |            |             |            |            |            |             |            |            |             |            |            |            |             |      |
| LG09                                                        |  | ns         | ns         | ns          | ns          | ns          | ns         | ns          |            |            |            |             |            |            |            |             |            |            |             |            |            |            |             |      |
| LG10                                                        |  | ns         | ns         | ns          | ns          | ns          | ns         | ns          | ns         |            |            |             |            |            |            |             |            |            |             |            |            |            |             |      |
| LG11                                                        |  | ns         | ns         | ns          | ns          | ns          | ns         | ns          | ns         | ns         |            |             |            |            |            |             |            |            |             |            |            |            |             |      |
| LG12                                                        |  | *          | ns         | ns          | **          | *           | ns         | *           | ns         | ns         | ns         | ns          |            |            |            |             |            |            |             |            |            |            |             |      |
| LG13                                                        |  | ns         | ns         | ns          | *           | ns          | ns         | ns          | ns         | ns         | ns         | ns          | ns         |            |            |             |            |            |             |            |            |            |             |      |
| LG14                                                        |  | ns         | ns         | ns          | *           | ns          | ns         | ns          | ns         | ns         | ns         | ns          | ns         | ns         |            |             |            |            |             |            |            |            |             |      |
| LG15                                                        |  | ns         | ns         | ns          | ns          | ns          | ns         | ns          | ns         | ns         | ns         | ns          | ns         | ns         | ns         |             |            |            |             |            |            |            |             |      |
| LG16                                                        |  | *          | ns         | ns          | ***         | *           | ns         | *           | ns         | ns         | ns         | *           | ns         | ns         | ns         | ns          |            |            |             |            |            |            |             |      |
| LG17                                                        |  | **         | ns         | *           | ****        | **          | ns         | ***         | ns         | *          | ns         | **          | ns         | ns         | ns         | *           | ns         |            |             |            |            |            |             |      |
| LG18                                                        |  | ns         | ns         | ns          | ns          | ns          | ns         | ns          | ns         | ns         | ns         | ns          | ns         | ns         | ns         | ns          | ns         | *          | ns          |            |            |            |             |      |
| LG19                                                        |  | ****       | ****       | ****        | ****        | ****        | ****       | ****        | ****       | ****       | ****       | ****        | ****       | ****       | ****       | ****        | ****       | ****       | ****        | ****       | ****       | ****       | ****        | **** |
| LG20                                                        |  | *          | ns         | ns          | **          | ns          | ns         | *           | ns         | ns         | ns         | ns          | ns         | ns         | ns         | ns          | ns         | ns         | ns          | ns         | ****       |            |             |      |
| LG22                                                        |  | ns         | ns         | ns          | ns          | ns          | ns         | ns          | ns         | ns         | ns         | ns          | ns         | ns         | ns         | ns          | ns         | ns         | *           | ns         | ****       | ns         |             |      |
| LG23                                                        |  | ns         | ns         | ns          | ns          | ns          | ns         | ns          | ns         | ns         | ns         | ns          | ns         | ns         | ns         | ns          | ns         | ns         | *           | ns         | ****       | ns         | ns          |      |





| <i>Tropheus annectens</i>                                   |                                           | LG01       | LG02        | LG03       | LG04       | LG05       | LG06        | LG07      | LG08       | LG09        | LG10      | LG11       | LG12      | LG13        | LG14        | LG15      | LG16       | LG17        | LG18       | LG19       | LG20        | LG22      | LG23        |    |
|-------------------------------------------------------------|-------------------------------------------|------------|-------------|------------|------------|------------|-------------|-----------|------------|-------------|-----------|------------|-----------|-------------|-------------|-----------|------------|-------------|------------|------------|-------------|-----------|-------------|----|
| Sex-specific SNP inspection                                 |                                           |            |             |            |            |            |             |           |            |             |           |            |           |             |             |           |            |             |            |            |             |           |             |    |
| Individual                                                  | 1M, 1F                                    |            |             |            |            |            |             |           |            |             |           |            |           |             |             |           |            |             |            |            |             |           |             |    |
| Transcriptome                                               |                                           |            |             |            |            |            |             |           |            |             |           |            |           |             |             |           |            |             |            |            |             |           |             |    |
| Pooled                                                      |                                           |            |             |            |            |            |             |           |            |             |           |            |           |             |             |           |            |             |            |            |             |           |             |    |
| Kruskal-Wallis for heterogeneity among chromosomes, df = 21 |                                           |            |             |            |            |            |             |           |            |             |           |            |           |             |             |           |            |             |            |            |             |           |             |    |
|                                                             | 1M, 1F                                    |            |             |            |            |            |             |           |            |             |           |            |           |             |             |           |            |             |            |            |             |           |             |    |
|                                                             | chi-squared = 75.528, p-value < 4.449e-08 |            |             |            |            |            |             |           |            |             |           |            |           |             |             |           |            |             |            |            |             |           |             |    |
| Top 1% (# windows per chromosome)                           |                                           |            |             |            |            |            |             |           |            |             |           |            |           |             |             |           |            |             |            |            |             |           |             |    |
|                                                             | 1M, 1F                                    |            |             |            |            |            |             |           |            |             |           |            |           |             |             |           |            |             |            |            |             |           |             |    |
| XY                                                          |                                           | 0          | 4           | 15         | 1          | 0          | 1           | 0         | 0          | 1           | 2         | 0          | 0         | 3           | 0           | 0         | 0          | 0           | 1          | 0          | 0           | 4         | 1           |    |
| ZW                                                          |                                           | 0          | 2           | 12         | 1          | 0          | 2           | 0         | 1          | 3           | 1         | 2          | 2         | 1           | 2           | 0         | 1          | 0           | 0          | 0          | 2           | 7         | 6           |    |
| mean per chromosome log2(XY:ZW) ratio of SNP density        |                                           |            |             |            |            |            |             |           |            |             |           |            |           |             |             |           |            |             |            |            |             |           |             |    |
|                                                             | 1M, 1F                                    | 0.02835635 | -0.04977938 | 0.18539596 | 0.01330093 | 0.08219535 | -0.04740918 | 0.0450097 | 0.01610488 | -0.15552425 | 0.1606326 | 0.01165631 | 0.0086625 | -0.03036763 | -0.45302413 | 0.0644143 | 0.09194617 | -0.06953547 | 0.05450422 | 0.11270231 | -0.17890307 | 0.0194157 | -0.49637699 |    |
| Dunn's test to identify outlier chromosomes                 |                                           |            |             |            |            |            |             |           |            |             |           |            |           |             |             |           |            |             |            |            |             |           |             |    |
|                                                             | 1M, 1F                                    |            |             |            |            |            |             |           |            |             |           |            |           |             |             |           |            |             |            |            |             |           |             |    |
|                                                             | LG01                                      |            |             |            |            |            |             |           |            |             |           |            |           |             |             |           |            |             |            |            |             |           |             |    |
|                                                             | LG02                                      | ns         |             |            |            |            |             |           |            |             |           |            |           |             |             |           |            |             |            |            |             |           |             |    |
|                                                             | LG03                                      | ns         | ns          |            |            |            |             |           |            |             |           |            |           |             |             |           |            |             |            |            |             |           |             |    |
|                                                             | LG04                                      | ns         | ns          | ns         |            |            |             |           |            |             |           |            |           |             |             |           |            |             |            |            |             |           |             |    |
|                                                             | LG05                                      | ns         | ns          | ns         | ns         |            |             |           |            |             |           |            |           |             |             |           |            |             |            |            |             |           |             |    |
|                                                             | LG06                                      | ns         | ns          | ns         | ns         | ns         |             |           |            |             |           |            |           |             |             |           |            |             |            |            |             |           |             |    |
|                                                             | LG07                                      | ns         | ns          | ns         | ns         | ns         | ns          |           |            |             |           |            |           |             |             |           |            |             |            |            |             |           |             |    |
|                                                             | LG08                                      | ns         | ns          | ns         | ns         | ns         | ns          | ns        |            |             |           |            |           |             |             |           |            |             |            |            |             |           |             |    |
|                                                             | LG09                                      | ns         | ns          | *          | ns         | ns         | ns          | ns        | ns         |             |           |            |           |             |             |           |            |             |            |            |             |           |             |    |
|                                                             | LG10                                      | ns         | ns          | ns         | ns         | ns         | ns          | ns        | ns         | *           |           |            |           |             |             |           |            |             |            |            |             |           |             |    |
|                                                             | LG11                                      | ns         | ns          | ns         | ns         | ns         | ns          | ns        | ns         | ns          | ns        |            |           |             |             |           |            |             |            |            |             |           |             |    |
|                                                             | LG12                                      | ns         | ns          | ns         | ns         | ns         | ns          | ns        | ns         | ns          | ns        | ns         |           |             |             |           |            |             |            |            |             |           |             |    |
|                                                             | LG13                                      | ns         | ns          | ns         | ns         | ns         | ns          | ns        | ns         | ns          | ns        | ns         | ns        |             |             |           |            |             |            |            |             |           |             |    |
|                                                             | LG14                                      | **         | ns          | ***        | *          | **         | **          | **        | *          | ns          | ***       | *          | **        | **          | **          |           |            |             |            |            |             |           |             |    |
|                                                             | LG15                                      | ns         | ns          | ns         | ns         | ns         | ns          | ns        | ns         | ns          | ns        | ns         | ns        | ns          | ns          | ns        |            |             |            |            |             |           |             |    |
|                                                             | LG16                                      | ns         | ns          | ns         | ns         | ns         | ns          | ns        | ns         | *           | ns        | ns         | ns        | ns          | ns          | ns        | ns         |             |            |            |             |           |             |    |
|                                                             | LG17                                      | ns         | ns          | ns         | ns         | ns         | ns          | ns        | ns         | ns          | *         | ns         | ns        | ns          | ns          | ns        | ns         | ns          |            |            |             |           |             |    |
|                                                             | LG18                                      | ns         | ns          | ns         | ns         | ns         | ns          | ns        | ns         | ns          | *         | ns         | ns        | ns          | ns          | ns        | ns         | ns          | ns         |            |             |           |             |    |
|                                                             | LG19                                      | ns         | ns          | ns         | ns         | ns         | ns          | ns        | ns         | ns          | *         | ns         | ns        | ns          | ns          | ns        | ns         | ns          | ns         | ns         |             |           |             |    |
|                                                             | LG20                                      | ns         | ns          | ns         | ns         | ns         | ns          | ns        | ns         | ns          | ns        | ns         | ns        | ns          | ns          | ns        | ns         | ns          | ns         | ns         | ns          |           |             |    |
|                                                             | LG22                                      | ns         | ns          | ns         | ns         | ns         | ns          | ns        | ns         | ns          | ns        | ns         | ns        | ns          | ns          | ns        | ns         | ns          | ns         | ns         | ns          | ns        |             |    |
|                                                             | LG23                                      | ***        | *           | ***        | **         | ***        | **          | ***       | **         | ns          | ***       | **         | **        | **          | ns          | ***       | ***        | *           | ***        | ***        | **          | **        | **          | ** |

| <i>Tropheus polli</i>                                       |  | LG01        | LG02       | LG03        | LG04       | LG05       | LG06       | LG07        | LG08        | LG09        | LG10       | LG11       | LG12       | LG13       | LG14       | LG15       | LG16        | LG17        | LG18        | LG19       | LG20       | LG22       | LG23       |      |
|-------------------------------------------------------------|--|-------------|------------|-------------|------------|------------|------------|-------------|-------------|-------------|------------|------------|------------|------------|------------|------------|-------------|-------------|-------------|------------|------------|------------|------------|------|
| Sex-specific SNP inspection                                 |  |             |            |             |            |            |            |             |             |             |            |            |            |            |            |            |             |             |             |            |            |            |            |      |
| Individual                                                  |  | 1M, 1F      |            |             |            |            |            |             |             |             |            |            |            |            |            |            |             |             |             |            |            |            |            |      |
| Transcriptome                                               |  |             |            |             |            |            |            |             |             |             |            |            |            |            |            |            |             |             |             |            |            |            |            |      |
| Pooled                                                      |  |             |            |             |            |            |            |             |             |             |            |            |            |            |            |            |             |             |             |            |            |            |            |      |
| Kruskal-Wallis for heterogeneity among chromosomes, df = 21 |  |             |            |             |            |            |            |             |             |             |            |            |            |            |            |            |             |             |             |            |            |            |            |      |
| 1M, 1F                                                      |  |             |            |             |            |            |            |             |             |             |            |            |            |            |            |            |             |             |             |            |            |            |            |      |
| chi-squared = 586.57, p-value < 2.2e-16                     |  |             |            |             |            |            |            |             |             |             |            |            |            |            |            |            |             |             |             |            |            |            |            |      |
| Top 1% (# windows per chromosome)                           |  |             |            |             |            |            |            |             |             |             |            |            |            |            |            |            |             |             |             |            |            |            |            |      |
| 1M, 1F                                                      |  |             |            |             |            |            |            |             |             |             |            |            |            |            |            |            |             |             |             |            |            |            |            |      |
| XY                                                          |  | 0           | 0          | 0           | 0          | 0          | 0          | 0           | 0           | 0           | 0          | 0          | 0          | 0          | 0          | 0          | 0           | 0           | 0           | 0          | 77         | 0          | 0          | 0    |
| ZW                                                          |  | 0           | 0          | 0           | 0          | 0          | 0          | 0           | 0           | 0           | 0          | 0          | 0          | 0          | 0          | 0          | 0           | 0           | 0           | 0          | 0          | 0          | 0          | 0    |
| mean per chromosome log2(XY-ZW) ratio of SNP density        |  |             |            |             |            |            |            |             |             |             |            |            |            |            |            |            |             |             |             |            |            |            |            |      |
| 1M, 1F                                                      |  | -0.38086296 | 0.34774249 | -0.05130694 | 0.24548356 | 0.20572539 | -0.2955881 | -0.24803038 | -0.05951587 | -0.06599645 | 0.89656961 | -0.0871825 | 0.14372845 | -0.2943628 | 0.18996139 | 0.15418227 | -0.01397598 | -0.31858517 | -0.39090596 | 4.78300631 | 0.78708452 | 0.01034192 | 0.01244775 |      |
| Dunn's test to identify outlier chromosomes                 |  |             |            |             |            |            |            |             |             |             |            |            |            |            |            |            |             |             |             |            |            |            |            |      |
| 1M, 1F                                                      |  |             |            |             |            |            |            |             |             |             |            |            |            |            |            |            |             |             |             |            |            |            |            |      |
| LG01                                                        |  |             |            |             |            |            |            |             |             |             |            |            |            |            |            |            |             |             |             |            |            |            |            |      |
| LG02                                                        |  | ****        |            |             |            |            |            |             |             |             |            |            |            |            |            |            |             |             |             |            |            |            |            |      |
| LG03                                                        |  | *           | ns         |             |            |            |            |             |             |             |            |            |            |            |            |            |             |             |             |            |            |            |            |      |
| LG04                                                        |  | ****        | ns         | ns          |            |            |            |             |             |             |            |            |            |            |            |            |             |             |             |            |            |            |            |      |
| LG05                                                        |  | ***         | ns         | ns          | ns         |            |            |             |             |             |            |            |            |            |            |            |             |             |             |            |            |            |            |      |
| LG06                                                        |  | ns          | ***        | ns          | **         | **         |            |             |             |             |            |            |            |            |            |            |             |             |             |            |            |            |            |      |
| LG07                                                        |  | ns          | ****       | ns          | ***        | **         | ns         |             |             |             |            |            |            |            |            |            |             |             |             |            |            |            |            |      |
| LG08                                                        |  | ns          | *          | ns          | ns         | ns         | ns         | ns          |             |             |            |            |            |            |            |            |             |             |             |            |            |            |            |      |
| LG09                                                        |  | ns          | *          | ns          | ns         | ns         | ns         | ns          | ns          |             |            |            |            |            |            |            |             |             |             |            |            |            |            |      |
| LG10                                                        |  | ****        | *          | ****        | *          | **         | ****       | ****        | ****        | ****        |            |            |            |            |            |            |             |             |             |            |            |            |            |      |
| LG11                                                        |  | ns          | *          | ns          | *          | ns         | ns         | ns          | ns          | ****        |            |            |            |            |            |            |             |             |             |            |            |            |            |      |
| LG12                                                        |  | **          | ns         | ns          | ns         | ns         | *          | *           | ns          | ns          | ns         | ns         | ****       |            |            |            |             |             |             |            |            |            |            |      |
| LG13                                                        |  | ns          | ****       | ns          | **         | **         | ns         | ns          | ns          | ns          | ns         | ns         | *          |            |            |            |             |             |             |            |            |            |            |      |
| LG14                                                        |  | ***         | ns         | ns          | ns         | ns         | ns         | **          | **          | ns          | ns         | ns         | **         | **         |            |            |             |             |             |            |            |            |            |      |
| LG15                                                        |  | **          | ns         | ns          | ns         | ns         | *          | **          | ns          | ns          | ns         | ns         | *          | ns         | ns         |            |             |             |             |            |            |            |            |      |
| LG16                                                        |  | *           | *          | ns          | ns         | ns         | ns         | ns          | ns          | ns          | ns         | ns         | ****       | ns         | ns         | ns         | ns          |             |             |            |            |            |            |      |
| LG17                                                        |  | ns          | ****       | ns          | ***        | **         | ns         | ns          | ns          | ns          | ns         | ****       | ns         | *          | ns         | ***        | **          | ns          |             |            |            |            |            |      |
| LG18                                                        |  | ns          | ****       | *           | ***        | **         | ns         | ns          | ns          | ns          | ****       | ns         | *          | ns         | ***        | **         | ns          | ns          |             |            |            |            |            |      |
| LG19                                                        |  | ****        | ****       | ****        | ****       | ****       | ****       | ****        | ****        | ****        | ****       | ****       | ****       | ****       | ****       | ****       | ****        | ****        | ****        | ****       | ****       | ****       | ****       | **** |
| LG20                                                        |  | ns          | *          | ns          | ns         | ns         | ns         | ns          | ns          | ****        | ns         | ns         | ns         | ns         | ns         | ns         | ns          | ns          | ns          | ****       | ****       | ****       | ****       |      |
| LG22                                                        |  | **          | ns         | ns          | ns         | ns         | *          | **          | ns          | ns          | ****       | ns         | ns         | *          | ns         | ns         | ns          | ns          | **          | **         | ****       | ****       | ****       |      |
| LG23                                                        |  | *           | ns         | ns          | ns         | ns         | ns         | ns          | ns          | ****        | ns         | ns         | ns         | ns         | ns         | ns         | ns          | *           | *           | ****       | ****       | ****       | ****       |      |

| <i>Tropheus sp. 'red'</i>                                   |                                            | LG01        | LG02        | LG03       | LG04       | LG05      | LG06       | LG07        | LG08       | LG09       | LG10      | LG11       | LG12       | LG13       | LG14        | LG15       | LG16       | LG17      | LG18        | LG19       | LG20        | LG22      | LG23        |
|-------------------------------------------------------------|--------------------------------------------|-------------|-------------|------------|------------|-----------|------------|-------------|------------|------------|-----------|------------|------------|------------|-------------|------------|------------|-----------|-------------|------------|-------------|-----------|-------------|
| Sex-specific SNP inspection                                 |                                            |             |             |            |            |           |            |             |            |            |           |            |            |            |             |            |            |           |             |            |             |           |             |
|                                                             | Individual                                 | 1M, 1F      |             |            |            |           |            |             |            |            |           |            |            |            |             |            |            |           |             |            |             |           |             |
|                                                             | Transcriptome                              |             |             |            |            |           |            |             |            |            |           |            |            |            |             |            |            |           |             |            |             |           |             |
|                                                             | Pooled                                     |             |             |            |            |           |            |             |            |            |           |            |            |            |             |            |            |           |             |            |             |           |             |
| Kruskal-Wallis for heterogeneity among chromosomes, df = 21 |                                            |             |             |            |            |           |            |             |            |            |           |            |            |            |             |            |            |           |             |            |             |           |             |
|                                                             | 1M, 1F                                     |             |             |            |            |           |            |             |            |            |           |            |            |            |             |            |            |           |             |            |             |           |             |
|                                                             | chi-squared = 29.825,<br>p-value < 0.09556 |             |             |            |            |           |            |             |            |            |           |            |            |            |             |            |            |           |             |            |             |           |             |
| Top 1% (# windows per chromosome)                           |                                            |             |             |            |            |           |            |             |            |            |           |            |            |            |             |            |            |           |             |            |             |           |             |
|                                                             | 1M, 1F                                     |             |             |            |            |           |            |             |            |            |           |            |            |            |             |            |            |           |             |            |             |           |             |
|                                                             | XY                                         | 0           | 0           | 17         | 2          | 1         | 0          | 0           | 0          | 2          | 0         | 0          | 0          | 2          | 0           | 2          | 1          | 0         | 2           | 2          | 0           | 4         | 2           |
|                                                             | ZW                                         | 0           | 5           | 9          | 1          | 1         | 1          | 0           | 0          | 3          | 0         | 2          | 0          | 1          | 0           | 0          | 0          | 0         | 3           | 1          | 2           | 7         | 4           |
| mean per chromosome log2(XY:ZW) ratio of SNP density        |                                            |             |             |            |            |           |            |             |            |            |           |            |            |            |             |            |            |           |             |            |             |           |             |
|                                                             | 1M, 1F                                     | -0.00636948 | -0.12564886 | 0.07918274 | 0.03011987 | 0.0288336 | 0.09595159 | -0.03329331 | 0.02885024 | -0.1156553 | 0.0899754 | 0.07079385 | 0.12299181 | 0.02014075 | -0.02629346 | 0.06940708 | 0.14705282 | -0.153233 | -0.01640881 | 0.10896778 | -0.71414048 | 0.0117198 | -0.03002561 |



| <i>Tropheus sp. 'murago'</i>                                       |                                           | LG01        | LG02        | LG03        | LG04       | LG05      | LG06       | LG07       | LG08       | LG09       | LG10       | LG11       | LG12       | LG13       | LG14        | LG15       | LG16        | LG17       | LG18       | LG19       | LG20       | LG22       | LG23        |
|--------------------------------------------------------------------|-------------------------------------------|-------------|-------------|-------------|------------|-----------|------------|------------|------------|------------|------------|------------|------------|------------|-------------|------------|-------------|------------|------------|------------|------------|------------|-------------|
| <b>Sex-specific SNP inspection</b>                                 |                                           |             |             |             |            |           |            |            |            |            |            |            |            |            |             |            |             |            |            |            |            |            |             |
| Individual                                                         | 1M, 1F                                    |             |             |             |            |           |            |            |            |            |            |            |            |            |             |            |             |            |            |            |            |            |             |
| Transcriptome                                                      |                                           |             |             |             |            |           |            |            |            |            |            |            |            |            |             |            |             |            |            |            |            |            |             |
| Pooled                                                             |                                           |             |             |             |            |           |            |            |            |            |            |            |            |            |             |            |             |            |            |            |            |            |             |
| <b>Kruskal-Wallis for heterogeneity among chromosomes, df = 21</b> |                                           |             |             |             |            |           |            |            |            |            |            |            |            |            |             |            |             |            |            |            |            |            |             |
|                                                                    | 1M, 1F                                    |             |             |             |            |           |            |            |            |            |            |            |            |            |             |            |             |            |            |            |            |            |             |
|                                                                    | chi-squared = 26.287,<br>p-value < 0.1957 |             |             |             |            |           |            |            |            |            |            |            |            |            |             |            |             |            |            |            |            |            |             |
| <b>Top 1% (# windows per chromosome)</b>                           |                                           |             |             |             |            |           |            |            |            |            |            |            |            |            |             |            |             |            |            |            |            |            |             |
|                                                                    | 1M, 1F                                    |             |             |             |            |           |            |            |            |            |            |            |            |            |             |            |             |            |            |            |            |            |             |
| XY                                                                 |                                           | 0           | 2           | 11          | 2          | 1         | 2          | 0          | 2          | 0          | 0          | 1          | 0          | 0          | 0           | 0          | 0           | 0          | 4          | 2          | 0          | 6          | 3           |
| ZW                                                                 |                                           | 0           | 4           | 15          | 2          | 0         | 2          | 0          | 0          | 4          | 2          | 1          | 0          | 1          | 0           | 0          | 0           | 0          | 3          | 1          | 0          | 5          | 1           |
| <b>mean per chromosome log2(XY:ZW) ratio of SNP density</b>        |                                           |             |             |             |            |           |            |            |            |            |            |            |            |            |             |            |             |            |            |            |            |            |             |
|                                                                    | 1M, 1F                                    | -0.04402759 | -0.00862437 | -0.13033366 | 0.03686251 | 0.0525695 | 0.07084778 | 0.00193155 | 0.00812197 | 0.00726261 | 0.05629503 | 0.06855637 | 0.24331918 | 0.04616279 | -0.01223413 | 0.00155131 | -0.07611394 | 0.04974705 | 0.20818476 | 0.04065562 | 0.38867777 | 0.08405907 | -0.01657738 |



| <i>Lobochilates labiatus</i>                                |                                           | LG01       | LG02        | LG03        | LG04        | LG05       | LG06        | LG07       | LG08        | LG09        | LG10        | LG11        | LG12        | LG13        | LG14       | LG15       | LG16      | LG17        | LG18       | LG19        | LG20        | LG22       | LG23       |
|-------------------------------------------------------------|-------------------------------------------|------------|-------------|-------------|-------------|------------|-------------|------------|-------------|-------------|-------------|-------------|-------------|-------------|------------|------------|-----------|-------------|------------|-------------|-------------|------------|------------|
| Sex-specific SNP inspection                                 |                                           |            |             |             |             |            |             |            |             |             |             |             |             |             |            |            |           |             |            |             |             |            |            |
|                                                             | Individual                                | 1M, 1F     |             |             |             |            |             |            |             |             |             |             |             |             |            |            |           |             |            |             |             |            |            |
|                                                             | Transcriptome                             | 3M, 3F     |             |             |             |            |             |            |             |             |             |             |             |             |            |            |           |             |            |             |             |            |            |
|                                                             | Pooled                                    |            |             |             |             |            |             |            |             |             |             |             |             |             |            |            |           |             |            |             |             |            |            |
| Kruskal-Wallis for heterogeneity among chromosomes, df = 21 |                                           |            |             |             |             |            |             |            |             |             |             |             |             |             |            |            |           |             |            |             |             |            |            |
|                                                             | 1M, 1F                                    |            |             |             |             |            |             |            |             |             |             |             |             |             |            |            |           |             |            |             |             |            |            |
|                                                             | chi-squared = 83.671, p-value < 1.948e-09 |            |             |             |             |            |             |            |             |             |             |             |             |             |            |            |           |             |            |             |             |            |            |
| Top 1% (# windows per chromosome)                           |                                           |            |             |             |             |            |             |            |             |             |             |             |             |             |            |            |           |             |            |             |             |            |            |
|                                                             | 1M, 1F                                    |            |             |             |             |            |             |            |             |             |             |             |             |             |            |            |           |             |            |             |             |            |            |
|                                                             | XY                                        | 0          | 3           | 6           | 1           | 0          | 1           | 0          | 1           | 0           | 1           | 1           | 0           | 1           | 2          | 1          | 1         | 0           | 3          | 0           | 0           | 13         | 4          |
|                                                             | ZW                                        | 0          | 2           | 9           | 1           | 2          | 1           | 1          | 4           | 3           | 0           | 0           | 0           | 1           | 1          | 0          | 1         | 0           | 3          | 0           | 0           | 11         | 5          |
| mean per chromosome log2(XY:ZW) ratio of SNP density        |                                           |            |             |             |             |            |             |            |             |             |             |             |             |             |            |            |           |             |            |             |             |            |            |
|                                                             | 1M, 1F                                    | 0.33716243 | -0.10266981 | -0.34981353 | -0.04396188 | 0.06934207 | -0.01488092 | 0.12288298 | -0.30210001 | -0.22192777 | -0.02035397 | -0.02863847 | -0.17012823 | -0.09123992 | 0.16338983 | 0.15582176 | 0.0558152 | -0.06583842 | 0.04811598 | -0.05925791 | -0.26258058 | 0.01624466 | 0.20275207 |
| Dunn's test to identify outlier chromosomes                 |                                           |            |             |             |             |            |             |            |             |             |             |             |             |             |            |            |           |             |            |             |             |            |            |
|                                                             | 1M, 1F                                    |            |             |             |             |            |             |            |             |             |             |             |             |             |            |            |           |             |            |             |             |            |            |
|                                                             | LG01                                      | **         |             |             |             |            |             |            |             |             |             |             |             |             |            |            |           |             |            |             |             |            |            |
|                                                             | LG02                                      |            |             |             |             |            |             |            |             |             |             |             |             |             |            |            |           |             |            |             |             |            |            |
|                                                             | LG03                                      | ***        | ns          |             |             |            |             |            |             |             |             |             |             |             |            |            |           |             |            |             |             |            |            |
|                                                             | LG04                                      | **         | ns          | ns          |             |            |             |            |             |             |             |             |             |             |            |            |           |             |            |             |             |            |            |
|                                                             | LG05                                      | ns         | ns          | ***         | ns          |            |             |            |             |             |             |             |             |             |            |            |           |             |            |             |             |            |            |
|                                                             | LG06                                      | *          | ns          | **          | ns          | ns         |             |            |             |             |             |             |             |             |            |            |           |             |            |             |             |            |            |
|                                                             | LG07                                      | ns         | ns          | ****        | ns          | ns         | ns          |            |             |             |             |             |             |             |            |            |           |             |            |             |             |            |            |
|                                                             | LG08                                      | ****       | ns          | ns          | ns          | *          | ns          | *          |             |             |             |             |             |             |            |            |           |             |            |             |             |            |            |
|                                                             | LG09                                      | **         | ns          | ns          | ns          | ns         | ns          | ns         | ns          |             |             |             |             |             |            |            |           |             |            |             |             |            |            |
|                                                             | LG10                                      | **         | ns          | *           | ns          | ns         | ns          | ns         | ns          | ns          |             |             |             |             |            |            |           |             |            |             |             |            |            |
|                                                             | LG11                                      | **         | ns          | *           | ns          | ns         | ns          | ns         | ns          | ns          | ns          |             |             |             |            |            |           |             |            |             |             |            |            |
|                                                             | LG12                                      | ***        | ns          | ns          | ns          | ns         | ns          | *          | ns          | ns          | ns          | ns          |             |             |            |            |           |             |            |             |             |            |            |
|                                                             | LG13                                      | ***        | ns          | ns          | ns          | ns         | ns          | ns         | ns          | ns          | ns          | ns          | ns          |             |            |            |           |             |            |             |             |            |            |
|                                                             | LG14                                      | ns         | ns          | ***         | ns          | ns         | ns          | ns         | *           | ns          | ns          | ns          | ns          | ns          |            |            |           |             |            |             |             |            |            |
|                                                             | LG15                                      | ns         | ns          | ***         | ns          | ns         | ns          | ns         | *           | ns          | ns          | ns          | ns          | ns          | ns         |            |           |             |            |             |             |            |            |
|                                                             | LG16                                      | *          | ns          | **          | ns          | ns         | ns          | ns         | ns          | ns          | ns          | ns          | ns          | ns          | ns         | ns         |           |             |            |             |             |            |            |
|                                                             | LG17                                      | **         | ns          | *           | ns          | ns         | ns          | ns         | ns          | ns          | ns          | ns          | ns          | ns          | ns         | ns         | ns        |             |            |             |             |            |            |
|                                                             | LG18                                      | ns         | ns          | **          | ns          | ns         | ns          | ns         | ns          | ns          | ns          | ns          | ns          | ns          | ns         | ns         | ns        | ns          |            |             |             |            |            |
|                                                             | LG19                                      | *          | ns          | *           | ns          | ns         | ns          | ns         | ns          | ns          | ns          | ns          | ns          | ns          | ns         | ns         | ns        | ns          | ns         |             |             |            |            |
|                                                             | LG20                                      | **         | ns          | *           | ns          | ns         | ns          | ns         | ns          | ns          | ns          | ns          | ns          | ns          | ns         | ns         | ns        | ns          | ns         | ns          |             |            |            |
|                                                             | LG22                                      | **         | ns          | *           | ns          | ns         | ns          | ns         | ns          | ns          | ns          | ns          | ns          | ns          | ns         | ns         | ns        | ns          | ns         | ns          | ns          |            |            |
|                                                             | LG23                                      | ns         | *           | ****        | *           | ns         | ns          | ns         | **          | *           | ns          | ns          | **          | *           | ns         | ns         | ns        | *           | ns         | ns          | ns          | ns         |            |



| <i>Petrochromis trewavasae</i>                              |  | LG01                                       | LG02        | LG03       | LG04       | LG05       | LG06       | LG07        | LG08       | LG09        | LG10        | LG11        | LG12        | LG13        | LG14       | LG15       | LG16       | LG17        | LG18        | LG19       | LG20      | LG22      | LG23      |             |
|-------------------------------------------------------------|--|--------------------------------------------|-------------|------------|------------|------------|------------|-------------|------------|-------------|-------------|-------------|-------------|-------------|------------|------------|------------|-------------|-------------|------------|-----------|-----------|-----------|-------------|
| Sex-specific SNP inspection                                 |  |                                            |             |            |            |            |            |             |            |             |             |             |             |             |            |            |            |             |             |            |           |           |           |             |
| Individual                                                  |  | 1M, 1F                                     |             |            |            |            |            |             |            |             |             |             |             |             |            |            |            |             |             |            |           |           |           |             |
| Transcriptome                                               |  |                                            |             |            |            |            |            |             |            |             |             |             |             |             |            |            |            |             |             |            |           |           |           |             |
| Pooled                                                      |  |                                            |             |            |            |            |            |             |            |             |             |             |             |             |            |            |            |             |             |            |           |           |           |             |
| Kruskal-Wallis for heterogeneity among chromosomes, df = 21 |  |                                            |             |            |            |            |            |             |            |             |             |             |             |             |            |            |            |             |             |            |           |           |           |             |
|                                                             |  | 1M, 1F                                     |             |            |            |            |            |             |            |             |             |             |             |             |            |            |            |             |             |            |           |           |           |             |
|                                                             |  | chi-squared = 500.74,<br>p-value < 2.2e-16 |             |            |            |            |            |             |            |             |             |             |             |             |            |            |            |             |             |            |           |           |           |             |
| Top 1% (# windows per chromosome)                           |  |                                            |             |            |            |            |            |             |            |             |             |             |             |             |            |            |            |             |             |            |           |           |           |             |
|                                                             |  | 1M, 1F                                     |             |            |            |            |            |             |            |             |             |             |             |             |            |            |            |             |             |            |           |           |           |             |
| XY                                                          |  |                                            | 0           | 1          | 3          | 0          | 30         | 0           | 0          | 0           | 0           | 0           | 0           | 0           | 0          | 0          | 0          | 0           | 0           | 0          | 39        | 0         | 1         | 0           |
| ZW                                                          |  |                                            | 0           | 0          | 0          | 1          | 0          | 0           | 0          | 0           | 0           | 0           | 0           | 0           | 0          | 0          | 0          | 0           | 0           | 0          | 0         | 0         | 0         | 2           |
| mean per chromosome log2(XY:ZW) ratio of SNP density        |  |                                            |             |            |            |            |            |             |            |             |             |             |             |             |            |            |            |             |             |            |           |           |           |             |
|                                                             |  | 1M, 1F                                     | -0.23506118 | 0.41100065 | 0.99139641 | 1.52889066 | 1.21630123 | -0.35273927 | 0.02506788 | -0.37445388 | -0.16858851 | -0.25094589 | -0.13985383 | -0.02682793 | 0.16719942 | 0.36532195 | 0.14048726 | -0.12604281 | -0.24767316 | 0.00695823 | 1.2478654 | 0.1833018 | -0.063788 | -0.34794287 |
| Dunn's test to identify outlier chromosomes                 |  |                                            |             |            |            |            |            |             |            |             |             |             |             |             |            |            |            |             |             |            |           |           |           |             |
|                                                             |  | 1M, 1F                                     |             |            |            |            |            |             |            |             |             |             |             |             |            |            |            |             |             |            |           |           |           |             |
| LG01                                                        |  |                                            | ****        |            |            |            |            |             |            |             |             |             |             |             |            |            |            |             |             |            |           |           |           |             |
| LG02                                                        |  |                                            | ****        | ***        |            |            |            |             |            |             |             |             |             |             |            |            |            |             |             |            |           |           |           |             |
| LG03                                                        |  |                                            | ****        | ****       | ***        |            |            |             |            |             |             |             |             |             |            |            |            |             |             |            |           |           |           |             |
| LG04                                                        |  |                                            | ****        | ****       | ****       | ***        |            |             |            |             |             |             |             |             |            |            |            |             |             |            |           |           |           |             |
| LG05                                                        |  |                                            | ****        | **         | ns         | ****       |            |             |            |             |             |             |             |             |            |            |            |             |             |            |           |           |           |             |
| LG06                                                        |  |                                            | ns          | ****       | ****       | ****       | ****       |             |            |             |             |             |             |             |            |            |            |             |             |            |           |           |           |             |
| LG07                                                        |  |                                            | ns          | **         | ****       | ****       | ****       | **          |            |             |             |             |             |             |            |            |            |             |             |            |           |           |           |             |
| LG08                                                        |  |                                            | ns          | ****       | ****       | ****       | ****       | ns          | **         |             |             |             |             |             |            |            |            |             |             |            |           |           |           |             |
| LG09                                                        |  |                                            | ns          | **         | ****       | ****       | ****       | ns          | ns         | ns          |             |             |             |             |            |            |            |             |             |            |           |           |           |             |
| LG10                                                        |  |                                            | ns          | ****       | ****       | ****       | ****       | ns          | ns         | ns          | ns          |             |             |             |            |            |            |             |             |            |           |           |           |             |
| LG11                                                        |  |                                            | ns          | ***        | ****       | ****       | ****       | ns          | ns         | ns          | ns          | ns          |             |             |            |            |            |             |             |            |           |           |           |             |
| LG12                                                        |  |                                            | ns          | **         | ****       | ****       | ****       | ns          | ns         | ns          | ns          | ns          | ns          |             |            |            |            |             |             |            |           |           |           |             |
| LG13                                                        |  |                                            | *           | ns         | ****       | ****       | ****       | ****        | ns         | ns          | **          | **          | ns          | ns          | ns         | ns         | ns         | ns          | ns          | ns         | ns        | ns        | ns        | ns          |
| LG14                                                        |  |                                            | ****        | ns         | ****       | ****       | ****       | ****        | **         | ****        | **          | ****        | ****        | **          | ns         | ns         | ns         | ns          | ns          | ns         | ns        | ns        | ns        | ns          |
| LG15                                                        |  |                                            | **          | ns         | ****       | ****       | ****       | ****        | ns         | ****        | ns          | **          | *           | ns          | ns         | ns         | ns         | ns          | ns          | ns         | ns        | ns        | ns        | ns          |
| LG16                                                        |  |                                            | ns          | ****       | ****       | ****       | ****       | ****        | ns         | ns          | ns          | ns          | ns          | ns          | ns         | ns         | ns         | ns          | ns          | ns         | ns        | ns        | ns        | ns          |
| LG17                                                        |  |                                            | ns          | ****       | ****       | ****       | ****       | ****        | ns         | ns          | ns          | ns          | ns          | ns          | ns         | ns         | ns         | ns          | ns          | ns         | ns        | ns        | ns        | ns          |
| LG18                                                        |  |                                            | ns          | *          | ****       | ****       | ****       | ****        | *          | ns          | *           | ns          | ns          | ns          | ns         | ns         | ns         | ns          | ns          | ns         | ns        | ns        | ns        | ns          |
| LG19                                                        |  |                                            | ****        | **         | ns         | ****       | ****       | ****        | ****       | ****        | ****        | ****        | ****        | ****        | ****       | ****       | ****       | ****        | ****        | ****       | ****      | ****      | ****      | ****        |
| LG20                                                        |  |                                            | ns          | *          | ****       | ****       | ****       | ****        | **         | ns          | *           | ns          | ns          | ns          | ns         | ns         | ns         | ns          | ns          | ns         | ns        | ****      | ****      |             |
| LG22                                                        |  |                                            | ns          | **         | ****       | ****       | ****       | ****        | ns         | ns          | ns          | ns          | ns          | ns          | ns         | ns         | ns         | ns          | ns          | ns         | ns        | ****      | ****      |             |
| LG23                                                        |  |                                            | ns          | ****       | ****       | ****       | ****       | ****        | ns         | *           | ns          | ns          | ns          | ns          | ns         | ****       | ****       | ns          | ns          | ns         | *         | ****      | *         | ns          |

| <i>Petrochromis sp. 'kipili brown'</i>                             | LG01       | LG02       | LG03       | LG04       | LG05       | LG06        | LG07        | LG08        | LG09       | LG10      | LG11       | LG12       | LG13       | LG14       | LG15       | LG16        | LG17       | LG18      | LG19       | LG20       | LG22       | LG23        |
|--------------------------------------------------------------------|------------|------------|------------|------------|------------|-------------|-------------|-------------|------------|-----------|------------|------------|------------|------------|------------|-------------|------------|-----------|------------|------------|------------|-------------|
| <b>Sex-specific SNP inspection</b>                                 |            |            |            |            |            |             |             |             |            |           |            |            |            |            |            |             |            |           |            |            |            |             |
| Individual                                                         | 1M, 1F     |            |            |            |            |             |             |             |            |           |            |            |            |            |            |             |            |           |            |            |            |             |
| Transcriptome                                                      |            |            |            |            |            |             |             |             |            |           |            |            |            |            |            |             |            |           |            |            |            |             |
| Pooled                                                             |            |            |            |            |            |             |             |             |            |           |            |            |            |            |            |             |            |           |            |            |            |             |
| <b>Kruskal-Wallis for heterogeneity among chromosomes, df = 21</b> |            |            |            |            |            |             |             |             |            |           |            |            |            |            |            |             |            |           |            |            |            |             |
| 1M, 1F                                                             |            |            |            |            |            |             |             |             |            |           |            |            |            |            |            |             |            |           |            |            |            |             |
| chi-squared = 1211, p-value < 2.2e-16                              |            |            |            |            |            |             |             |             |            |           |            |            |            |            |            |             |            |           |            |            |            |             |
| <b>Top 1% (# windows per chromosome)</b>                           |            |            |            |            |            |             |             |             |            |           |            |            |            |            |            |             |            |           |            |            |            |             |
| 1M, 1F                                                             |            |            |            |            |            |             |             |             |            |           |            |            |            |            |            |             |            |           |            |            |            |             |
| XY                                                                 | 1          | 1          | 4          | 14         | 0          | 0           | 0           | 0           | 1          | 0         | 9          | 0          | 1          | 0          | 0          | 0           | 1          | 2         | 4          | 12         | 17         | 0           |
| ZW                                                                 | 0          | 0          | 2          | 0          | 0          | 1           | 0           | 0           | 1          | 1         | 1          | 0          | 0          | 1          | 2          | 0           | 0          | 1         | 0          | 0          | 2          | 1           |
| <b>mean per chromosome log2(XY:ZW) ratio of SNP density</b>        |            |            |            |            |            |             |             |             |            |           |            |            |            |            |            |             |            |           |            |            |            |             |
| 1M, 1F                                                             | 1.64327574 | 0.04847143 | 0.36192776 | 1.04760426 | 0.68155563 | -0.25694648 | -0.02967323 | -0.02478319 | 0.07373965 | -0.028202 | 1.57115523 | 0.03760709 | 0.24705906 | 0.03647726 | 0.06283384 | -0.14255226 | 0.80202554 | 0.0669544 | 0.62960159 | 0.35283762 | 1.70634441 | -0.04001991 |
| <b>Dunn's test to identify outlier chromosomes</b>                 |            |            |            |            |            |             |             |             |            |           |            |            |            |            |            |             |            |           |            |            |            |             |
| 1M, 1F                                                             |            |            |            |            |            |             |             |             |            |           |            |            |            |            |            |             |            |           |            |            |            |             |
| LG01                                                               | ****       |            |            |            |            |             |             |             |            |           |            |            |            |            |            |             |            |           |            |            |            |             |
| LG02                                                               | ****       | *          |            |            |            |             |             |             |            |           |            |            |            |            |            |             |            |           |            |            |            |             |
| LG03                                                               | ****       |            | *          |            |            |             |             |             |            |           |            |            |            |            |            |             |            |           |            |            |            |             |
| LG04                                                               | ****       | ****       | ****       |            |            |             |             |             |            |           |            |            |            |            |            |             |            |           |            |            |            |             |
| LG05                                                               | ****       | ****       | *          | ***        |            |             |             |             |            |           |            |            |            |            |            |             |            |           |            |            |            |             |
| LG06                                                               | ****       | *          | ****       | ****       | ****       |             |             |             |            |           |            |            |            |            |            |             |            |           |            |            |            |             |
| LG07                                                               | ****       | ns         | ***        | ****       | ****       | ns          |             |             |            |           |            |            |            |            |            |             |            |           |            |            |            |             |
| LG08                                                               | ****       | ns         | **         | ****       | ****       | ns          | ns          |             |            |           |            |            |            |            |            |             |            |           |            |            |            |             |
| LG09                                                               | ****       | ns         | ns         | ****       | ***        | *           | ns          | ns          |            |           |            |            |            |            |            |             |            |           |            |            |            |             |
| LG10                                                               | ****       | ns         | **         | ****       | ****       | ns          | ns          | ns          | ns         |           |            |            |            |            |            |             |            |           |            |            |            |             |
| LG11                                                               | ns         | ****       | ****       | ***        | ****       | ****        | ****        | ****        | ****       |           |            |            |            |            |            |             |            |           |            |            |            |             |
| LG12                                                               | ****       | ns         | **         | ****       | ****       | *           | ns          | ns          | ns         | ns        | ****       |            |            |            |            |             |            |           |            |            |            |             |
| LG13                                                               | ****       | ns         | ns         | ****       | **         | ****        | **          | *           | ns         | *         | ****       | *          |            |            |            |             |            |           |            |            |            |             |
| LG14                                                               | ****       | ns         | *          | ****       | ****       | *           | ns          | ns          | ns         | ns        | ****       | ns         | ns         |            |            |             |            |           |            |            |            |             |
| LG15                                                               | ****       | ns         | *          | ****       | ****       | *           | ns          | ns          | ns         | ns        | ****       | ns         | ns         | ns         |            |             |            |           |            |            |            |             |
| LG16                                                               | ****       | ****       | ****       | ****       | ****       | ****        | ns          | ns          | ns         | ns        | ****       | ns         | ****       | ****       | ****       | ****        | ****       | ****      | ****       | ****       | ****       | ****        |
| LG17                                                               | ****       | ****       | **         | *          | ****       | *           | ****        | ****        | ****       | ****      | ****       | ****       | ****       | ****       | ****       | ****        | ****       | ****      | ****       | ****       | ****       | ****        |
| LG18                                                               | ****       | ns         | *          | ****       | *          | ****        | ns          | ns          | ns         | ns        | ****       | ns         | ns         | ns         | ns         | ns          | ****       | ****      | ****       | ****       | ****       |             |
| LG19                                                               | ****       | **         | ns         | ****       | ns         | ****        | ****        | ****        | **         | ****      | ****       | ****       | ns         | ****       | **         | ****        | ns         | ****      | ****       | ****       | ****       | ****        |
| LG20                                                               | ****       | ****       | ****       | ns         | *          | ****        | ****        | ****        | ****       | ****      | ****       | ****       | ****       | ****       | ****       | ****        | ****       | ****      | ****       | ****       | ****       | ****        |
| LG22                                                               | ****       | ****       | ****       | ****       | ****       | ****        | ****        | ****        | ****       | ****      | ****       | ****       | ****       | ****       | ****       | ****        | ****       | ****      | ****       | ****       | ****       | ****        |
| LG23                                                               | ****       | ns         | ****       | ****       | ****       | ns          | ns          | ns          | ns         | ns        | ****       | ns         | *          | ns         | ns         | ns          | ****       | ns        | ****       | ****       | ****       | ****        |



| <i>Petrochromis sp. 'red'</i>                               |  | LG01       | LG02       | LG03        | LG04        | LG05       | LG06        | LG07       | LG08        | LG09       | LG10       | LG11      | LG12        | LG13       | LG14        | LG15        | LG16       | LG17        | LG18       | LG19       | LG20       | LG22       | LG23        |
|-------------------------------------------------------------|--|------------|------------|-------------|-------------|------------|-------------|------------|-------------|------------|------------|-----------|-------------|------------|-------------|-------------|------------|-------------|------------|------------|------------|------------|-------------|
| Sex-specific SNP inspection                                 |  |            |            |             |             |            |             |            |             |            |            |           |             |            |             |             |            |             |            |            |            |            |             |
| Individual                                                  |  | 1M, 1F     |            |             |             |            |             |            |             |            |            |           |             |            |             |             |            |             |            |            |            |            |             |
| Transcriptome                                               |  |            |            |             |             |            |             |            |             |            |            |           |             |            |             |             |            |             |            |            |            |            |             |
| Pooled                                                      |  |            |            |             |             |            |             |            |             |            |            |           |             |            |             |             |            |             |            |            |            |            |             |
| Kruskal-Wallis for heterogeneity among chromosomes, df = 21 |  |            |            |             |             |            |             |            |             |            |            |           |             |            |             |             |            |             |            |            |            |            |             |
| 1M, 1F                                                      |  |            |            |             |             |            |             |            |             |            |            |           |             |            |             |             |            |             |            |            |            |            |             |
| chi-squared = 79.617, p-value < 9.355e-09                   |  |            |            |             |             |            |             |            |             |            |            |           |             |            |             |             |            |             |            |            |            |            |             |
| Top 1% (# windows per chromosome)                           |  |            |            |             |             |            |             |            |             |            |            |           |             |            |             |             |            |             |            |            |            |            |             |
| 1M, 1F                                                      |  |            |            |             |             |            |             |            |             |            |            |           |             |            |             |             |            |             |            |            |            |            |             |
| XY                                                          |  | 0          |            |             |             |            |             |            |             |            |            |           |             |            |             |             |            |             |            |            |            |            |             |
| ZW                                                          |  | 0          | 4          | 11          | 1           | 0          | 0           | 0          | 1           | 3          | 0          | 0         | 0           | 2          | 0           | 0           | 2          | 0           | 4          | 0          | 0          | 5          | 2           |
| mean per chromosome log2(XY:ZW) ratio of SNP density        |  |            |            |             |             |            |             |            |             |            |            |           |             |            |             |             |            |             |            |            |            |            |             |
| 1M, 1F                                                      |  | 0.13210226 | 0.07896166 | -0.09093339 | -0.10601577 | 0.50632301 | -0.07863083 | 0.03183419 | -0.12223235 | 0.10952519 | 0.05748468 | 0.0421005 | -0.15478177 | 0.11931875 | -0.03380464 | -0.17761156 | 0.03214181 | -0.02494644 | 0.01897743 | 0.62085397 | 0.23104047 | 0.03373921 | -0.01996731 |
| Dunn's test to identify outlier chromosomes                 |  | 1M, 1F     |            |             |             |            |             |            |             |            |            |           |             |            |             |             |            |             |            |            |            |            |             |
| LG01                                                        |  |            |            |             |             |            |             |            |             |            |            |           |             |            |             |             |            |             |            |            |            |            |             |
| LG02                                                        |  | ns         |            |             |             |            |             |            |             |            |            |           |             |            |             |             |            |             |            |            |            |            |             |
| LG03                                                        |  | ns         | ns         |             |             |            |             |            |             |            |            |           |             |            |             |             |            |             |            |            |            |            |             |
| LG04                                                        |  | ns         | ns         | ns          |             |            |             |            |             |            |            |           |             |            |             |             |            |             |            |            |            |            |             |
| LG05                                                        |  | ns         | *          | ****        | ****        |            |             |            |             |            |            |           |             |            |             |             |            |             |            |            |            |            |             |
| LG06                                                        |  | ns         | ns         | ns          | ns          | ****       |             |            |             |            |            |           |             |            |             |             |            |             |            |            |            |            |             |
| LG07                                                        |  | ns         | ns         | ns          | ns          | **         | ns          |            |             |            |            |           |             |            |             |             |            |             |            |            |            |            |             |
| LG08                                                        |  | ns         | ns         | ns          | ns          | ****       | ns          | ns         |             |            |            |           |             |            |             |             |            |             |            |            |            |            |             |
| LG09                                                        |  | ns         | ns         | ns          | ns          | ns         | ns          | ns         |             |            |            |           |             |            |             |             |            |             |            |            |            |            |             |
| LG10                                                        |  | ns         | ns         | ns          | ns          | **         | ns          | ns         | ns          | ns         |            |           |             |            |             |             |            |             |            |            |            |            |             |
| LG11                                                        |  | ns         | ns         | ns          | ns          | **         | ns          | ns         | ns          | ns         | ns         |           |             |            |             |             |            |             |            |            |            |            |             |
| LG12                                                        |  | ns         | ns         | ns          | ns          | ****       | ns          | ns         | ns          | ns         | ns         | ns        |             |            |             |             |            |             |            |            |            |            |             |
| LG13                                                        |  | ns         | ns         | ns          | ns          | ***        | ns          | ns         | ns          | ns         | ns         | ns        | ns          |            |             |             |            |             |            |            |            |            |             |
| LG14                                                        |  | ns         | ns         | ns          | ns          | ****       | ns          | ns         | ns          | ns         | ns         | ns        | ns          | ns         |             |             |            |             |            |            |            |            |             |
| LG15                                                        |  | *          | ns         | ns          | ns          | ****       | ns          | ns         | ns          | ns         | ns         | ns        | ns          | *          | ns          |             |            |             |            |            |            |            |             |
| LG16                                                        |  | ns         | ns         | ns          | ns          | **         | ns          | ns         | ns          | ns         | ns         | ns        | ns          | ns         | ns          | ns          |            |             |            |            |            |            |             |
| LG17                                                        |  | ns         | ns         | ns          | ns          | **         | ns          | ns         | ns          | ns         | ns         | ns        | ns          | ns         | ns          | ns          | ns         |             |            |            |            |            |             |
| LG18                                                        |  | ns         | ns         | ns          | ns          | **         | ns          | ns         | ns          | ns         | ns         | ns        | ns          | ns         | ns          | ns          | ns         | ns          |            |            |            |            |             |
| LG19                                                        |  | *          | **         | ****        | ****        | **         | ****        | ***        | ****        | *          | **         | **        | ****        | *          | ***         | ****        | **         | ***         | **         |            |            |            |             |
| LG20                                                        |  | ns         | ns         | ns          | ns          | **         | ns          | ns         | ns          | ns         | ns         | ns        | ns          | ns         | ns          | ns          | ns         | ns          | ns         | ns         | **         |            |             |
| LG22                                                        |  | ns         | ns         | ns          | ns          | *          | ns          | ns         | ns          | ns         | ns         | ns        | ns          | ns         | ns          | ns          | ns         | ns          | ns         | ns         | *          | ns         |             |
| LG23                                                        |  | ns         | ns         | ns          | ns          | ***        | ns          | ns         | ns          | ns         | ns         | ns        | ns          | ns         | ns          | ns          | ns         | ns          | ns         | ns         | ***        | ns         | ns          |







| <i>Petrochromis sp. 'macrogynathus rainbow'</i>             |  | LG01        | LG02        | LG03       | LG04       | LG05       | LG06       | LG07       | LG08        | LG09       | LG10        | LG11        | LG12       | LG13       | LG14        | LG15       | LG16       | LG17       | LG18       | LG19      | LG20        | LG22        | LG23        |      |
|-------------------------------------------------------------|--|-------------|-------------|------------|------------|------------|------------|------------|-------------|------------|-------------|-------------|------------|------------|-------------|------------|------------|------------|------------|-----------|-------------|-------------|-------------|------|
| Sex-specific SNP inspection                                 |  |             |             |            |            |            |            |            |             |            |             |             |            |            |             |            |            |            |            |           |             |             |             |      |
| Individual                                                  |  | 1M, 1F      |             |            |            |            |            |            |             |            |             |             |            |            |             |            |            |            |            |           |             |             |             |      |
| Transcriptome                                               |  |             |             |            |            |            |            |            |             |            |             |             |            |            |             |            |            |            |            |           |             |             |             |      |
| Pooled                                                      |  |             |             |            |            |            |            |            |             |            |             |             |            |            |             |            |            |            |            |           |             |             |             |      |
| Kruskal-Wallis for heterogeneity among chromosomes, df = 21 |  |             |             |            |            |            |            |            |             |            |             |             |            |            |             |            |            |            |            |           |             |             |             |      |
| 1M, 1F                                                      |  |             |             |            |            |            |            |            |             |            |             |             |            |            |             |            |            |            |            |           |             |             |             |      |
| chi-squared = 198.85, p-value < 2.2e-16                     |  |             |             |            |            |            |            |            |             |            |             |             |            |            |             |            |            |            |            |           |             |             |             |      |
| Top 1% (# windows per chromosome)                           |  |             |             |            |            |            |            |            |             |            |             |             |            |            |             |            |            |            |            |           |             |             |             |      |
| 1M, 1F                                                      |  |             |             |            |            |            |            |            |             |            |             |             |            |            |             |            |            |            |            |           |             |             |             |      |
| XY                                                          |  | 1           | 0           | 8          | 0          | 8          | 2          | 1          | 1           | 1          | 0           | 0           | 0          | 1          | 0           | 2          | 0          | 0          | 0          | 20        | 0           | 5           | 2           |      |
| ZW                                                          |  | 0           | 1           | 7          | 1          | 1          | 2          | 0          | 0           | 0          | 0           | 2           | 0          | 0          | 0           | 0          | 1          | 0          | 1          | 1         | 0           | 6           | 3           |      |
| mean per chromosome log2(XY:ZW) ratio of SNP density        |  |             |             |            |            |            |            |            |             |            |             |             |            |            |             |            |            |            |            |           |             |             |             |      |
| 1M, 1F                                                      |  | -0.08535219 | -0.10566172 | 0.06119606 | 0.05290293 | 0.90453784 | 0.19823853 | 0.07285151 | -0.21124195 | 0.07751588 | -0.00905218 | -0.13694066 | 0.30009651 | 0.23577348 | -0.22024983 | 0.25629923 | 0.00142031 | 0.17781878 | -0.1794376 | 1.3335875 | -0.01050435 | -0.03813594 | -0.16898071 |      |
| Dunn's test to identify outlier chromosomes                 |  |             |             |            |            |            |            |            |             |            |             |             |            |            |             |            |            |            |            |           |             |             |             |      |
| 1M, 1F                                                      |  |             |             |            |            |            |            |            |             |            |             |             |            |            |             |            |            |            |            |           |             |             |             |      |
| LG01                                                        |  |             |             |            |            |            |            |            |             |            |             |             |            |            |             |            |            |            |            |           |             |             |             |      |
| LG02                                                        |  | ns          |             |            |            |            |            |            |             |            |             |             |            |            |             |            |            |            |            |           |             |             |             |      |
| LG03                                                        |  | ns          | ns          |            |            |            |            |            |             |            |             |             |            |            |             |            |            |            |            |           |             |             |             |      |
| LG04                                                        |  | ns          | ns          | ns         |            |            |            |            |             |            |             |             |            |            |             |            |            |            |            |           |             |             |             |      |
| LG05                                                        |  | ****        | ****        | ****       | ****       |            |            |            |             |            |             |             |            |            |             |            |            |            |            |           |             |             |             |      |
| LG06                                                        |  | *           | *           | ns         | ns         | **         |            |            |             |            |             |             |            |            |             |            |            |            |            |           |             |             |             |      |
| LG07                                                        |  | ns          | ns          | ns         | ns         | ****       | ns         |            |             |            |             |             |            |            |             |            |            |            |            |           |             |             |             |      |
| LG08                                                        |  | ns          | ns          | ns         | ns         | ****       | *          | ns         |             |            |             |             |            |            |             |            |            |            |            |           |             |             |             |      |
| LG09                                                        |  | ns          | ns          | ns         | ns         | ****       | ns         | ns         | ns          |            |             |             |            |            |             |            |            |            |            |           |             |             |             |      |
| LG10                                                        |  | ns          | ns          | ns         | ns         | ****       | ns         | ns         | ns          | ns         |             |             |            |            |             |            |            |            |            |           |             |             |             |      |
| LG11                                                        |  | ns          | ns          | ns         | ns         | ****       | ns         | ns         | ns          | ns         | ns          |             |            |            |             |            |            |            |            |           |             |             |             |      |
| LG12                                                        |  | *           | *           | ns         | ns         | **         | ns         | ns         | *           | ns         | ns          | *           |            |            |             |            |            |            |            |           |             |             |             |      |
| LG13                                                        |  | ns          | ns          | ns         | ns         | **         | ns         | ns         | ns          | ns         | ns          | ns          | ns         |            |             |            |            |            |            |           |             |             |             |      |
| LG14                                                        |  | ns          | ns          | *          | ns         | ****       | **         | *          | ns          | ns         | ns          | ns          | ****       | **         |             |            |            |            |            |           |             |             |             |      |
| LG15                                                        |  | *           | *           | ns         | ns         | **         | ns         | ns         | *           | ns         | ns          | *           | ns         | ns         | ***         |            |            |            |            |           |             |             |             |      |
| LG16                                                        |  | ns          | ns          | ns         | ns         | ****       | ns         | ns         | ns          | ns         | ns          | ns          | ns         | ns         | ns          | ns         | ns         |            |            |           |             |             |             |      |
| LG17                                                        |  | ns          | ns          | ns         | ns         | ***        | ns         | ns         | ns          | ns         | ns          | ns          | ns         | ns         | *           | ns         | ns         |            |            |           |             |             |             |      |
| LG18                                                        |  | ns          | ns          | ns         | ns         | ****       | *          | ns         | ns          | ns         | ns          | **          | *          | ns         | **          | ns         | ns         | ns         |            |           |             |             |             |      |
| LG19                                                        |  | ****        | ****        | ****       | ****       | *          | ****       | ****       | ****        | ****       | ****        | ****        | ****       | ****       | ****        | ****       | ****       | ****       | ****       | ****      | ****        | ****        | ****        | **** |
| LG20                                                        |  | ns          | ns          | ns         | ns         | ****       | ns         | ns         | ns          | ns         | ns          | ns          | *          | ns         | *           | ns         | ns         | ns         | ns         | ns        | ns          | ns          | ns          | ns   |
| LG22                                                        |  | ns          | ns          | ns         | ns         | ****       | ns         | ns         | ns          | ns         | ns          | ns          | ns         | ns         | ns          | ns         | ns         | ns         | ns         | ns        | ns          | ns          | ns          | ns   |
| LG23                                                        |  | ns          | ns          | *          | ns         | ****       | **         | *          | ns          | ns         | ns          | ns          | **         | *          | ns          | **         | ns         | *          | ns         | ****      | ns          | ns          | ns          | ns   |



| <i>Petrochromis sp. 'glant'</i>                             |  | LG01       | LG02        | LG03       | LG04        | LG05       | LG06        | LG07       | LG08       | LG09       | LG10       | LG11        | LG12        | LG13       | LG14       | LG15        | LG16       | LG17       | LG18        | LG19       | LG20        | LG22       | LG23        |     |
|-------------------------------------------------------------|--|------------|-------------|------------|-------------|------------|-------------|------------|------------|------------|------------|-------------|-------------|------------|------------|-------------|------------|------------|-------------|------------|-------------|------------|-------------|-----|
| Sex-specific SNP inspection                                 |  |            |             |            |             |            |             |            |            |            |            |             |             |            |            |             |            |            |             |            |             |            |             |     |
| Individual                                                  |  | 1M, 1F     |             |            |             |            |             |            |            |            |            |             |             |            |            |             |            |            |             |            |             |            |             |     |
| Transcriptome                                               |  |            |             |            |             |            |             |            |            |            |            |             |             |            |            |             |            |            |             |            |             |            |             |     |
| Pooled                                                      |  |            |             |            |             |            |             |            |            |            |            |             |             |            |            |             |            |            |             |            |             |            |             |     |
| Kruskal-Wallis for heterogeneity among chromosomes, df = 21 |  |            |             |            |             |            |             |            |            |            |            |             |             |            |            |             |            |            |             |            |             |            |             |     |
| 1M, 1F                                                      |  |            |             |            |             |            |             |            |            |            |            |             |             |            |            |             |            |            |             |            |             |            |             |     |
| chi-squared = 134.2, p-value < 2.2e-16                      |  |            |             |            |             |            |             |            |            |            |            |             |             |            |            |             |            |            |             |            |             |            |             |     |
| Top 1% (# windows per chromosome)                           |  |            |             |            |             |            |             |            |            |            |            |             |             |            |            |             |            |            |             |            |             |            |             |     |
| 1M, 1F                                                      |  |            |             |            |             |            |             |            |            |            |            |             |             |            |            |             |            |            |             |            |             |            |             |     |
| XY                                                          |  | 0          | 0           | 9          | 2           | 9          | 1           | 0          | 2          | 1          | 1          | 2           | 3           | 0          | 1          | 0           | 0          | 0          | 0           | 21         | 0           | 4          | 0           |     |
| ZW                                                          |  | 0          | 3           | 4          | 1           | 0          | 1           | 1          | 0          | 2          | 0          | 1           | 1           | 1          | 0          | 3           | 0          | 1          | 1           | 0          | 0           | 7          | 1           |     |
| mean per chromosome log2(XY:ZW) ratio of SNP density        |  |            |             |            |             |            |             |            |            |            |            |             |             |            |            |             |            |            |             |            |             |            |             |     |
| 1M, 1F                                                      |  | 0.02783935 | -0.02667604 | 0.12613925 | -0.13460299 | 0.44600415 | -0.10139665 | -0.0596522 | 0.17964453 | 0.13470348 | 0.47059289 | -0.13510548 | -0.09718878 | -0.3151799 | -0.3862231 | -0.14721957 | 0.06821946 | 0.09578963 | -0.17552269 | 0.84730308 | -0.22299081 | 0.00177184 | -0.00273586 |     |
| Dunn's test to identify outlier chromosomes                 |  |            |             |            |             |            |             |            |            |            |            |             |             |            |            |             |            |            |             |            |             |            |             |     |
| 1M, 1F                                                      |  |            |             |            |             |            |             |            |            |            |            |             |             |            |            |             |            |            |             |            |             |            |             |     |
| LG01                                                        |  |            |             |            |             |            |             |            |            |            |            |             |             |            |            |             |            |            |             |            |             |            |             |     |
| LG02                                                        |  | ns         |             |            |             |            |             |            |            |            |            |             |             |            |            |             |            |            |             |            |             |            |             |     |
| LG03                                                        |  | ns         | ns          |            |             |            |             |            |            |            |            |             |             |            |            |             |            |            |             |            |             |            |             |     |
| LG04                                                        |  | ns         | ns          | ns         |             |            |             |            |            |            |            |             |             |            |            |             |            |            |             |            |             |            |             |     |
| LG05                                                        |  | *          | *           | ns         | **          |            |             |            |            |            |            |             |             |            |            |             |            |            |             |            |             |            |             |     |
| LG06                                                        |  | ns         | ns          | ns         | ns          | **         |             |            |            |            |            |             |             |            |            |             |            |            |             |            |             |            |             |     |
| LG07                                                        |  | ns         | ns          | ns         | ns          | ***        | ns          |            |            |            |            |             |             |            |            |             |            |            |             |            |             |            |             |     |
| LG08                                                        |  | ns         | ns          | ns         | ns          | ns         | ns          | ns         |            |            |            |             |             |            |            |             |            |            |             |            |             |            |             |     |
| LG09                                                        |  | ns         | ns          | ns         | ns          | ns         | ns          | ns         | ns         |            |            |             |             |            |            |             |            |            |             |            |             |            |             |     |
| LG10                                                        |  | **         | **          | *          | ***         | ns         | ***         | ***        | ***        | ns         | ns         |             |             |            |            |             |            |            |             |            |             |            |             |     |
| LG11                                                        |  | ns         | ns          | ns         | ns          | **         | ns          | ns         | ns         | ns         | ns         | ***         |             |            |            |             |            |            |             |            |             |            |             |     |
| LG12                                                        |  | ns         | ns          | ns         | ns          | **         | ns          | ns         | ns         | ns         | ns         | ***         | ns          |            |            |             |            |            |             |            |             |            |             |     |
| LG13                                                        |  | ns         | ns          | *          | ns          | ***        | ns          | ns         | *          | *          | ***        | ns          | ns          | ns         |            |             |            |            |             |            |             |            |             |     |
| LG14                                                        |  | **         | *           | ***        | ns          | ***        | *           | *          | **         | **         | ***        | ns          | *           | ns         |            |             |            |            |             |            |             |            |             |     |
| LG15                                                        |  | ns         | ns          | ns         | ns          | ***        | ns          | ns         | ns         | *          | ***        | ns          | ns          | ns         | ns         |             |            |            |             |            |             |            |             |     |
| LG16                                                        |  | ns         | ns          | ns         | ns          | *          | ns          | ns         | ns         | ns         | ns         | *           | ns          | ns         | ns         | ns          | ns         |            |             |            |             |            |             |     |
| LG17                                                        |  | ns         | ns          | ns         | ns          | ***        | ns          | ns         | ns         | ns         | *          | ns          | ns          | ns         | ns         | ns          | ns         | ns         |             |            |             |            |             |     |
| LG18                                                        |  | ns         | ns          | ns         | ns          | ***        | ns          | ns         | ns         | ns         | ***        | ns          | ns          | ns         | ns         | ns          | ns         | ns         | ns          |            |             |            |             |     |
| LG19                                                        |  | ***        | ***         | ***        | ***         | *          | ***         | ***        | ***        | **         | ns         | ***         | ***         | ***        | ***        | ***         | ***        | ***        | ***         | ***        | ***         | ***        | ***         | *** |
| LG20                                                        |  | ns         | ns          | ns         | ns          | *          | ns          | ns         | ns         | ns         | ns         | *           | ns          | ns         | ns         | ns          | ns         | ns         | ns          | ns         | ns          | ***        | ***         |     |
| LG22                                                        |  | ns         | ns          | ns         | ns          | **         | ns          | ns         | ns         | ns         | ***        | ns          | ns          | ns         | ns         | *           | ns         | ns         | ns          | ns         | ns          | ***        | ***         |     |
| LG23                                                        |  | ns         | ns          | ns         | ns          | *          | ns          | ns         | ns         | ns         | ***        | ns          | ns          | ns         | ns         | **          | ns         | ns         | ns          | ns         | ns          | ***        | ***         |     |

| <i>Petrochromis sp. 'polyodon texas'</i>                    |                                        | LG01       | LG02       | LG03       | LG04       | LG05       | LG06        | LG07       | LG08       | LG09        | LG10        | LG11       | LG12       | LG13       | LG14        | LG15       | LG16        | LG17        | LG18       | LG19       | LG20        | LG22        | LG23        |    |
|-------------------------------------------------------------|----------------------------------------|------------|------------|------------|------------|------------|-------------|------------|------------|-------------|-------------|------------|------------|------------|-------------|------------|-------------|-------------|------------|------------|-------------|-------------|-------------|----|
| Sex-specific SNP inspection                                 |                                        |            |            |            |            |            |             |            |            |             |             |            |            |            |             |            |             |             |            |            |             |             |             |    |
|                                                             | Individual                             |            |            |            |            |            |             |            |            |             |             |            |            |            |             |            |             |             |            |            |             |             |             |    |
|                                                             | Transcriptome                          |            |            |            |            |            |             |            |            |             |             |            |            |            |             |            |             |             |            |            |             |             |             |    |
|                                                             | Pooled                                 |            |            |            |            |            |             |            |            |             |             |            |            |            |             |            |             |             |            |            |             |             |             |    |
| Kruskal-Wallis for heterogeneity among chromosomes, df = 21 |                                        |            |            |            |            |            |             |            |            |             |             |            |            |            |             |            |             |             |            |            |             |             |             |    |
|                                                             | 1M, 1F                                 |            |            |            |            |            |             |            |            |             |             |            |            |            |             |            |             |             |            |            |             |             |             |    |
|                                                             | chi-squared = 151.3, p-value < 2.2e-16 |            |            |            |            |            |             |            |            |             |             |            |            |            |             |            |             |             |            |            |             |             |             |    |
| Top 1% (# windows per chromosome)                           |                                        |            |            |            |            |            |             |            |            |             |             |            |            |            |             |            |             |             |            |            |             |             |             |    |
|                                                             | 1M, 1F                                 |            |            |            |            |            |             |            |            |             |             |            |            |            |             |            |             |             |            |            |             |             |             |    |
| XY                                                          |                                        | 0          | 3          | 7          | 0          | 11         | 0           | 0          | 1          | 0           | 0           | 3          | 1          | 0          | 0           | 1          | 0           | 0           | 0          | 24         | 0           | 6           | 2           |    |
| ZW                                                          |                                        | 0          | 0          | 4          | 0          | 0          | 0           | 0          | 0          | 2           | 0           | 2          | 0          | 1          | 0           | 1          | 0           | 1           | 1          | 1          | 0           | 4           | 2           |    |
| mean per chromosome log2(XY:ZW) ratio of SNP density        |                                        |            |            |            |            |            |             |            |            |             |             |            |            |            |             |            |             |             |            |            |             |             |             |    |
|                                                             | 1M, 1F                                 | 0.01457643 | 0.09038043 | 0.02987238 | 0.08784035 | 0.84839091 | -0.19025996 | 0.15243038 | 0.61671327 | -0.10293674 | -0.13295307 | 0.11946747 | 0.12295223 | 0.11412453 | -0.06079103 | -0.1169741 | -0.22551188 | -0.20534525 | -0.6401377 | 0.68739642 | -0.29424691 | -0.08111438 | -0.15148338 |    |
| Dunn's test to identify outlier chromosomes                 |                                        |            |            |            |            |            |             |            |            |             |             |            |            |            |             |            |             |             |            |            |             |             |             |    |
|                                                             | 1M, 1F                                 |            |            |            |            |            |             |            |            |             |             |            |            |            |             |            |             |             |            |            |             |             |             |    |
|                                                             | LG01                                   |            |            |            |            |            |             |            |            |             |             |            |            |            |             |            |             |             |            |            |             |             |             |    |
|                                                             | LG02                                   | ns         |            |            |            |            |             |            |            |             |             |            |            |            |             |            |             |             |            |            |             |             |             |    |
|                                                             | LG03                                   | ns         | ns         |            |            |            |             |            |            |             |             |            |            |            |             |            |             |             |            |            |             |             |             |    |
|                                                             | LG04                                   | ns         | ns         | ns         |            |            |             |            |            |             |             |            |            |            |             |            |             |             |            |            |             |             |             |    |
|                                                             | LG05                                   | ****       | ****       | ****       | ***        |            |             |            |            |             |             |            |            |            |             |            |             |             |            |            |             |             |             |    |
|                                                             | LG06                                   | ns         | ns         | ns         | ns         | ****       |             |            |            |             |             |            |            |            |             |            |             |             |            |            |             |             |             |    |
|                                                             | LG07                                   | ns         | ns         | ns         | ns         | ns         | *           |            |            |             |             |            |            |            |             |            |             |             |            |            |             |             |             |    |
|                                                             | LG08                                   | **         | **         | **         | *          | ns         | ****        | *          |            |             |             |            |            |            |             |            |             |             |            |            |             |             |             |    |
|                                                             | LG09                                   | ns         | ns         | ns         | ns         | ****       | ns          | ns         | ***        |             |             |            |            |            |             |            |             |             |            |            |             |             |             |    |
|                                                             | LG10                                   | ns         | ns         | ns         | ns         | ****       | ns          | *          | ****       | ns          |             |            |            |            |             |            |             |             |            |            |             |             |             |    |
|                                                             | LG11                                   | ns         | ns         | ns         | ns         | ****       | ns          | ns         | *          | ns          | ns          |            |            |            |             |            |             |             |            |            |             |             |             |    |
|                                                             | LG12                                   | ns         | ns         | ns         | ns         | ****       | *           | ns         | ns         | ns          | ns          | ns         |            |            |             |            |             |             |            |            |             |             |             |    |
|                                                             | LG13                                   | ns         | ns         | ns         | ns         | ****       | ns          | ns         | *          | ns          | ns          | ns         | ns         |            |             |            |             |             |            |            |             |             |             |    |
|                                                             | LG14                                   | ns         | ns         | ns         | ns         | ****       | ns          | ns         | *          | ns          | ns          | ns         | ns         | ns         |             |            |             |             |            |            |             |             |             |    |
|                                                             | LG15                                   | ns         | ns         | ns         | ns         | ****       | ns          | ns         | *          | ****        | ns          | ns         | ns         | ns         | ns          |            |             |             |            |            |             |             |             |    |
|                                                             | LG16                                   | ns         | ns         | ns         | ns         | ****       | ns          | *          | ****       | ns          | ns          | ns         | ns         | ns         | ns          | ns         |             |             |            |            |             |             |             |    |
|                                                             | LG17                                   | ns         | ns         | ns         | ns         | ****       | ns          | **         | ****       | ns          | ns          | ns         | *          | *          | ns          | ns         |             |             |            |            |             |             |             |    |
|                                                             | LG18                                   | ****       | ****       | ****       | ****       | ****       | *           | ****       | ****       | ns          | ns          | ****       | ****       | ns         | ns          | *          | *           | *           |            |            |             |             |             |    |
|                                                             | LG19                                   | *          | ns         | *          | ns         | ns         | ***         | ns         | ns         | **          | ****        | ns         | ns         | ns         | **          | **         | ***         | ***         | ****       |            |             |             |             |    |
|                                                             | LG20                                   | ns         | ns         | ns         | ns         | ****       | ns          | ns         | ***        | ns          | ns          | ns         | ns         | ns         | ns          | ns         | ns          | ns          | ns         | *          | **          |             |             |    |
|                                                             | LG22                                   | ns         | ns         | ns         | ns         | ****       | ns          | ns         | ***        | ns          | ns          | ns         | ns         | ns         | ns          | ns         | ns          | ns          | ns         | *          | **          |             |             |    |
|                                                             | LG23                                   | ns         | ns         | ns         | ns         | ****       | ns          | *          | ****       | ns          | ns          | ns         | *          | ns         | ns          | ns         | ns          | ns          | ns         | *          | ***         | ns          |             | ns |

| <i>Petrochromis polyodon</i>                                |                                           | LG01        | LG02        | LG03        | LG04        | LG05       | LG06        | LG07        | LG08        | LG09        | LG10       | LG11       | LG12        | LG13      | LG14       | LG15       | LG16       | LG17       | LG18        | LG19       | LG20       | LG22       | LG23        |    |
|-------------------------------------------------------------|-------------------------------------------|-------------|-------------|-------------|-------------|------------|-------------|-------------|-------------|-------------|------------|------------|-------------|-----------|------------|------------|------------|------------|-------------|------------|------------|------------|-------------|----|
| Sex-specific SNP inspection                                 |                                           |             |             |             |             |            |             |             |             |             |            |            |             |           |            |            |            |            |             |            |            |            |             |    |
| Individual                                                  | 1M, 1F                                    |             |             |             |             |            |             |             |             |             |            |            |             |           |            |            |            |            |             |            |            |            |             |    |
| Transcriptome                                               | 3M, 3F                                    |             |             |             |             |            |             |             |             |             |            |            |             |           |            |            |            |            |             |            |            |            |             |    |
| Pooled                                                      |                                           |             |             |             |             |            |             |             |             |             |            |            |             |           |            |            |            |            |             |            |            |            |             |    |
| Kruskal-Wallis for heterogeneity among chromosomes, df = 21 |                                           |             |             |             |             |            |             |             |             |             |            |            |             |           |            |            |            |            |             |            |            |            |             |    |
|                                                             | 1M, 1F                                    |             |             |             |             |            |             |             |             |             |            |            |             |           |            |            |            |            |             |            |            |            |             |    |
|                                                             | chi-squared = 53.476, p-value < 0.0001175 |             |             |             |             |            |             |             |             |             |            |            |             |           |            |            |            |            |             |            |            |            |             |    |
| Top 1% (# windows per chromosome)                           |                                           |             |             |             |             |            |             |             |             |             |            |            |             |           |            |            |            |            |             |            |            |            |             |    |
|                                                             | 1M, 1F                                    |             |             |             |             |            |             |             |             |             |            |            |             |           |            |            |            |            |             |            |            |            |             |    |
| XY                                                          |                                           | 0           | 0           | 7           | 1           | 1          | 0           | 0           | 2           | 3           | 1          | 5          | 1           | 0         | 1          | 2          | 2          | 1          | 2           | 3          | 0          | 2          | 3           |    |
| ZW                                                          |                                           | 0           | 3           | 12          | 0           | 0          | 2           | 0           | 2           | 1           | 0          | 2          | 3           | 1         | 0          | 3          | 0          | 0          | 1           | 0          | 1          | 3          | 5           |    |
| mean per chromosome log2(XY:ZW) ratio of SNP density        |                                           |             |             |             |             |            |             |             |             |             |            |            |             |           |            |            |            |            |             |            |            |            |             |    |
|                                                             | 1M, 1F                                    | -0.15334861 | -0.07646526 | -0.00993119 | -0.11848671 | 0.16951522 | -0.22586256 | -0.07853516 | -0.14648504 | -0.38961637 | 0.01305264 | 0.06585737 | -0.03444309 | 0.0492916 | 0.07139378 | 0.11241007 | -0.1407037 | 0.33065771 | -0.05205793 | 0.27022938 | -0.1917905 | 0.00430829 | -0.05442338 |    |
| Dunn's test to identify outlier chromosomes                 |                                           |             |             |             |             |            |             |             |             |             |            |            |             |           |            |            |            |            |             |            |            |            |             |    |
|                                                             | 1M, 1F                                    |             |             |             |             |            |             |             |             |             |            |            |             |           |            |            |            |            |             |            |            |            |             |    |
|                                                             | LG01                                      |             |             |             |             |            |             |             |             |             |            |            |             |           |            |            |            |            |             |            |            |            |             |    |
|                                                             | LG02                                      | ns          |             |             |             |            |             |             |             |             |            |            |             |           |            |            |            |            |             |            |            |            |             |    |
|                                                             | LG03                                      | ns          | ns          |             |             |            |             |             |             |             |            |            |             |           |            |            |            |            |             |            |            |            |             |    |
|                                                             | LG04                                      | ns          | ns          | ns          |             |            |             |             |             |             |            |            |             |           |            |            |            |            |             |            |            |            |             |    |
|                                                             | LG05                                      | ns          | ns          | ns          | ns          |            |             |             |             |             |            |            |             |           |            |            |            |            |             |            |            |            |             |    |
|                                                             | LG06                                      | ns          | ns          | ns          | ns          | *          |             |             |             |             |            |            |             |           |            |            |            |            |             |            |            |            |             |    |
|                                                             | LG07                                      | ns          | ns          | ns          | ns          | ns         | ns          |             |             |             |            |            |             |           |            |            |            |            |             |            |            |            |             |    |
|                                                             | LG08                                      | ns          | ns          | ns          | ns          | ns         | ns          | ns          |             |             |            |            |             |           |            |            |            |            |             |            |            |            |             |    |
|                                                             | LG09                                      | ns          | ns          | ns          | ns          | *          | ns          | ns          | ns          |             |            |            |             |           |            |            |            |            |             |            |            |            |             |    |
|                                                             | LG10                                      | ns          | ns          | ns          | ns          | ns         | ns          | ns          | ns          | ns          |            |            |             |           |            |            |            |            |             |            |            |            |             |    |
|                                                             | LG11                                      | ns          | ns          | ns          | ns          | ns         | ns          | ns          | ns          | ns          | ns         |            |             |           |            |            |            |            |             |            |            |            |             |    |
|                                                             | LG12                                      | ns          | ns          | ns          | ns          | ns         | ns          | ns          | ns          | ns          | ns         | ns         |             |           |            |            |            |            |             |            |            |            |             |    |
|                                                             | LG13                                      | ns          | ns          | ns          | ns          | ns         | ns          | ns          | ns          | ns          | ns         | ns         | ns          |           |            |            |            |            |             |            |            |            |             |    |
|                                                             | LG14                                      | ns          | ns          | ns          | ns          | ns         | ns          | ns          | ns          | *           | ns         | ns         | ns          | ns        |            |            |            |            |             |            |            |            |             |    |
|                                                             | LG15                                      | ns          | ns          | ns          | ns          | ns         | *           | ns          | ns          | *           | ns         | ns         | ns          | ns        | ns         |            |            |            |             |            |            |            |             |    |
|                                                             | LG16                                      | ns          | ns          | ns          | ns          | ns         | ns          | ns          | ns          | ns          | ns         | ns         | ns          | ns        | ns         | ns         |            |            |             |            |            |            |             |    |
|                                                             | LG17                                      | *           | *           | ns          | *           | ns         | **          | *           | *           | **          | ns         | ns         | *           | ns        | ns         | ns         | ns         | *          |             |            |            |            |             |    |
|                                                             | LG18                                      | ns          | ns          | ns          | ns          | ns         | ns          | ns          | ns          | ns          | ns         | ns         | ns          | ns        | ns         | ns         | ns         | ns         | *           |            |            |            |             |    |
|                                                             | LG19                                      | ns          | ns          | ns          | ns          | ns         | *           | ns          | ns          | *           | ns         | ns         | ns          | ns        | ns         | ns         | ns         | ns         | ns          | ns         | ns         |            |             |    |
|                                                             | LG20                                      | ns          | ns          | ns          | ns          | ns         | ns          | ns          | ns          | ns          | ns         | ns         | ns          | ns        | ns         | ns         | ns         | ns         | ns          | ns         | ns         | ns         |             |    |
|                                                             | LG22                                      | ns          | ns          | ns          | ns          | ns         | ns          | ns          | ns          | ns          | ns         | ns         | ns          | ns        | ns         | ns         | ns         | ns         | ns          | ns         | ns         | ns         | ns          |    |
|                                                             | LG23                                      | ns          | ns          | ns          | ns          | ns         | ns          | ns          | ns          | ns          | ns         | ns         | ns          | ns        | ns         | ns         | ns         | ns         | *           | ns         | ns         | ns         | ns          | ns |





| <i>Petrochromis fasciolatus</i>                                    |                                         | LG01       | LG02       | LG03       | LG04        | LG05       | LG06        | LG07       | LG08       | LG09      | LG10       | LG11       | LG12       | LG13       | LG14       | LG15        | LG16       | LG17        | LG18       | LG19       | LG20        | LG22       | LG23        |
|--------------------------------------------------------------------|-----------------------------------------|------------|------------|------------|-------------|------------|-------------|------------|------------|-----------|------------|------------|------------|------------|------------|-------------|------------|-------------|------------|------------|-------------|------------|-------------|
| <b>Sex-specific SNP inspection</b>                                 |                                         |            |            |            |             |            |             |            |            |           |            |            |            |            |            |             |            |             |            |            |             |            |             |
| Individual                                                         | 1M, 1F                                  |            |            |            |             |            |             |            |            |           |            |            |            |            |            |             |            |             |            |            |             |            |             |
| Transcriptome                                                      | 3M, 3F                                  |            |            |            |             |            |             |            |            |           |            |            |            |            |            |             |            |             |            |            |             |            |             |
| Pooled                                                             |                                         |            |            |            |             |            |             |            |            |           |            |            |            |            |            |             |            |             |            |            |             |            |             |
| <b>Kruskal-Wallis for heterogeneity among chromosomes, df = 21</b> |                                         |            |            |            |             |            |             |            |            |           |            |            |            |            |            |             |            |             |            |            |             |            |             |
|                                                                    | 1M, 1F                                  |            |            |            |             |            |             |            |            |           |            |            |            |            |            |             |            |             |            |            |             |            |             |
|                                                                    | chi-squared = 144.57, p-value < 2.2e-16 |            |            |            |             |            |             |            |            |           |            |            |            |            |            |             |            |             |            |            |             |            |             |
| <b>Top 1% (# windows per chromosome)</b>                           |                                         |            |            |            |             |            |             |            |            |           |            |            |            |            |            |             |            |             |            |            |             |            |             |
|                                                                    | 1M, 1F                                  |            |            |            |             |            |             |            |            |           |            |            |            |            |            |             |            |             |            |            |             |            |             |
| XY                                                                 |                                         | 0          | 4          | 8          | 0           | 15         | 0           | 0          | 1          | 3         | 0          | 1          | 0          | 1          | 1          | 0           | 0          | 0           | 0          | 20         | 0           | 4          | 0           |
| ZW                                                                 |                                         | 0          | 3          | 6          | 0           | 2          | 0           | 0          | 0          | 1         | 1          | 1          | 0          | 1          | 0          | 0           | 0          | 0           | 0          | 1          | 0           | 5          | 1           |
| <b>mean per chromosome log2(XY:ZW) ratio of SNP density</b>        |                                         |            |            |            |             |            |             |            |            |           |            |            |            |            |            |             |            |             |            |            |             |            |             |
|                                                                    | 1M, 1F                                  | 0.14859253 | 0.05941275 | 0.17528643 | -0.00151164 | 0.61921987 | -0.14019926 | 0.21877336 | 0.42153676 | 0.1723648 | 0.13837747 | 0.01622329 | 0.23212898 | 0.01507574 | 0.25902115 | -0.19250303 | 0.31607258 | -0.06501997 | -0.1022818 | 0.71413213 | -0.00299202 | 0.33396132 | -0.01289001 |
| <b>Dunn's test to identify outlier chromosomes</b>                 |                                         |            |            |            |             |            |             |            |            |           |            |            |            |            |            |             |            |             |            |            |             |            |             |
|                                                                    | 1M, 1F                                  |            |            |            |             |            |             |            |            |           |            |            |            |            |            |             |            |             |            |            |             |            |             |
|                                                                    | LG01                                    |            |            |            |             |            |             |            |            |           |            |            |            |            |            |             |            |             |            |            |             |            |             |
|                                                                    | LG02                                    | ns         |            |            |             |            |             |            |            |           |            |            |            |            |            |             |            |             |            |            |             |            |             |
|                                                                    | LG03                                    | ns         | ns         |            |             |            |             |            |            |           |            |            |            |            |            |             |            |             |            |            |             |            |             |
|                                                                    | LG04                                    | ns         | ns         | ns         |             |            |             |            |            |           |            |            |            |            |            |             |            |             |            |            |             |            |             |
|                                                                    | LG05                                    | ns         | *          | ns         | **          |            |             |            |            |           |            |            |            |            |            |             |            |             |            |            |             |            |             |
|                                                                    | LG06                                    | **         | *          | **         | ns          | ****       |             |            |            |           |            |            |            |            |            |             |            |             |            |            |             |            |             |
|                                                                    | LG07                                    | ns         | ns         | ns         | *           | ns         | ***         |            |            |           |            |            |            |            |            |             |            |             |            |            |             |            |             |
|                                                                    | LG08                                    | *          | **         | *          | ***         | ns         | ****        | ns         |            |           |            |            |            |            |            |             |            |             |            |            |             |            |             |
|                                                                    | LG09                                    | ns         | ns         | ns         | ns          | ns         | **          | ns         | ns         |           |            |            |            |            |            |             |            |             |            |            |             |            |             |
|                                                                    | LG10                                    | ns         | ns         | ns         | ns          | ns         | **          | ns         | ns         | ns        |            |            |            |            |            |             |            |             |            |            |             |            |             |
|                                                                    | LG11                                    | ns         | ns         | ns         | ns          | *          | ns          | ns         | **         | ns        | ns         |            |            |            |            |             |            |             |            |            |             |            |             |
|                                                                    | LG12                                    | ns         | ns         | ns         | *           | ns         | ***         | ns         | ns         | ns        | ns         | ns         |            |            |            |             |            |             |            |            |             |            |             |
|                                                                    | LG13                                    | ns         | ns         | ns         | ns          | **         | ns          | ns         | **         | ns        | ns         | ns         | ns         |            |            |             |            |             |            |            |             |            |             |
|                                                                    | LG14                                    | ns         | ns         | ns         | **          | ns         | ****        | ns         | ns         | ns        | *          | ns         | *          |            |            |             |            |             |            |            |             |            |             |
|                                                                    | LG15                                    | **         | *          | **         | ns          | ****       | ns          | ***        | ****       | *         | **         | ns         | ***        | ns         | ****       |             |            |             |            |            |             |            |             |
|                                                                    | LG16                                    | ns         | ns         | ns         | **          | ns         | ****        | ns         | ns         | ns        | *          | ns         | *          | ns         | ****       | ns          |            |             |            |            |             |            |             |
|                                                                    | LG17                                    | ns         | ns         | ns         | ns          | ****       | ns          | **         | ****       | ns        | *          | ns         | **         | ns         | **         | ns          | ns         |             |            |            |             |            |             |
|                                                                    | LG18                                    | **         | ns         | **         | ns          | ****       | ns          | ****       | ****       | *         | **         | ns         | ***        | ns         | ****       | ns          | ****       | ns          |            |            |             |            |             |
|                                                                    | LG19                                    | *          | **         | *          | ***         | ns         | ****        | ns         | ns         | ns        | ns         | **         | ns         | **         | ns         | ns          | ns         | ns          | *          | *          |             |            |             |
|                                                                    | LG20                                    | ns         | ns         | ns         | ns          | ns         | *           | ns         | *          | ns        | ns         | ns         | ns         | ns         | ns         | *           | ns         | ns          | *          | *          |             |            |             |
|                                                                    | LG22                                    | **         | **         | **         | ****        | ns         | ****        | *          | ns         | *         | *          | ****       | ns         | ***        | ns         | ****        | ns         | ****        | ****       | ns         | **          |            |             |
|                                                                    | LG23                                    | ns         | ns         | ns         | ns          | **         | ns          | ns         | ****       | ns        | ns         | ns         | ns         | ns         | *          | ns          | *          | ns          | ns         | **         | ns          | ****       |             |

| Interchromis loocki                                         |  | LG01        | LG02        | LG03       | LG04        | LG05       | LG06        | LG07        | LG08        | LG09       | LG10        | LG11         | LG12       | LG13        | LG14       | LG15       | LG16        | LG17       | LG18        | LG19       | LG20        | LG22       | LG23        |
|-------------------------------------------------------------|--|-------------|-------------|------------|-------------|------------|-------------|-------------|-------------|------------|-------------|--------------|------------|-------------|------------|------------|-------------|------------|-------------|------------|-------------|------------|-------------|
| Sex-specific SNP inspection                                 |  |             |             |            |             |            |             |             |             |            |             |              |            |             |            |            |             |            |             |            |             |            |             |
| Individual                                                  |  |             |             |            |             |            |             |             |             |            |             |              |            |             |            |            |             |            |             |            |             |            |             |
| Transcriptome                                               |  |             |             |            |             |            |             |             |             |            |             |              |            |             |            |            |             |            |             |            |             |            |             |
| Pooled                                                      |  |             |             |            |             |            |             |             |             |            |             |              |            |             |            |            |             |            |             |            |             |            |             |
| Kruskal-Wallis for heterogeneity among chromosomes, df = 21 |  |             |             |            |             |            |             |             |             |            |             |              |            |             |            |            |             |            |             |            |             |            |             |
| 1M, 1F                                                      |  |             |             |            |             |            |             |             |             |            |             |              |            |             |            |            |             |            |             |            |             |            |             |
| chi-squared = 163.54, p-value < 2.2e-16                     |  |             |             |            |             |            |             |             |             |            |             |              |            |             |            |            |             |            |             |            |             |            |             |
| 24M, 21F                                                    |  |             |             |            |             |            |             |             |             |            |             |              |            |             |            |            |             |            |             |            |             |            |             |
| chi-squared = 174.38, p-value < 2.2e-16                     |  |             |             |            |             |            |             |             |             |            |             |              |            |             |            |            |             |            |             |            |             |            |             |
| Top 1% (# windows per chromosome)                           |  |             |             |            |             |            |             |             |             |            |             |              |            |             |            |            |             |            |             |            |             |            |             |
| 1M, 1F                                                      |  |             |             |            |             |            |             |             |             |            |             |              |            |             |            |            |             |            |             |            |             |            |             |
| XY                                                          |  | 0           | 0           | 4          | 0           | 21         | 0           | 0           | 0           | 1          | 0           | 0            | 1          | 0           | 0          | 0          | 1           | 0          | 0           | 36         | 0           | 3          | 1           |
| ZW                                                          |  | 0           | 1           | 5          | 0           | 0          | 0           | 0           | 0           | 0          | 0           | 2            | 0          | 0           | 0          | 0          | 0           | 0          | 0           | 1          | 0           | 2          | 2           |
| 24M, 21F                                                    |  |             |             |            |             |            |             |             |             |            |             |              |            |             |            |            |             |            |             |            |             |            |             |
| XY                                                          |  | 0           | 0           | 0          | 0           | 32         | 0           | 0           | 0           | 0          | 0           | 0            | 0          | 0           | 0          | 0          | 0           | 0          | 0           | 45         | 0           | 0          | 0           |
| ZW                                                          |  | 0           | 0           | 0          | 0           | 0          | 0           | 0           | 0           | 0          | 0           | 0            | 0          | 0           | 0          | 0          | 0           | 0          | 0           | 0          | 0           | 0          | 0           |
| mean per chromosome log2(XY:ZW) ratio of SNP density        |  |             |             |            |             |            |             |             |             |            |             |              |            |             |            |            |             |            |             |            |             |            |             |
| 1M, 1F                                                      |  | -0.04195496 | -0.06814053 | 0.06437995 | 0.39799201  | 1.00131469 | 0.10741215  | -0.01724129 | -0.05567423 | 0.11136079 | -0.03352408 | -0.032725456 | 0.06818592 | -0.09757349 | 0.01328749 | 0.08673455 | 0.17512696  | 0.11439296 | 0.14139143  | 1.26500171 | 0.11605541  | 0.12013612 | -0.01587815 |
| 24M, 21F                                                    |  | -0.08125056 | -0.07607142 | -0.0415534 | -0.04535452 | 1.65666905 | -0.02731458 | -0.05350434 | 0.1731192   | 0.04147099 | -0.13278817 | -0.052748897 | 0.0034545  | -0.03545695 | 0.01262268 | 0.05757074 | -0.02342532 | 0.02695636 | -0.06601661 | 1.77003794 | -0.11074785 | 0.05348336 | 0.0694788   |
| Dunn's test to identify outlier chromosomes                 |  |             |             |            |             |            |             |             |             |            |             |              |            |             |            |            |             |            |             |            |             |            |             |
| 1M, 1F                                                      |  |             |             |            |             |            |             |             |             |            |             |              |            |             |            |            |             |            |             |            |             |            |             |
| LG01                                                        |  |             |             |            |             |            |             |             |             |            |             |              |            |             |            |            |             |            |             |            |             |            |             |
| LG02                                                        |  | ns          |             |            |             |            |             |             |             |            |             |              |            |             |            |            |             |            |             |            |             |            |             |
| LG03                                                        |  | ns          | ns          |            |             |            |             |             |             |            |             |              |            |             |            |            |             |            |             |            |             |            |             |
| LG04                                                        |  | ****        | ****        | ***        |             |            |             |             |             |            |             |              |            |             |            |            |             |            |             |            |             |            |             |
| LG05                                                        |  | ****        | ****        | ****       | ns          |            |             |             |             |            |             |              |            |             |            |            |             |            |             |            |             |            |             |
| LG06                                                        |  | ns          | ns          | ns         | *           | ****       |             |             |             |            |             |              |            |             |            |            |             |            |             |            |             |            |             |
| LG07                                                        |  | ns          | ns          | ns         | ****        | ****       | ns          |             |             |            |             |              |            |             |            |            |             |            |             |            |             |            |             |
| LG08                                                        |  | ns          | ns          | ns         | ****        | ****       | ns          | ns          |             |            |             |              |            |             |            |            |             |            |             |            |             |            |             |
| LG09                                                        |  | ns          | ns          | ns         | *           | ***        | ns          | ns          | ns          |            |             |              |            |             |            |            |             |            |             |            |             |            |             |
| LG10                                                        |  | ns          | ns          | ns         | ****        | ****       | ns          | ns          | ns          | ns         |             |              |            |             |            |            |             |            |             |            |             |            |             |
| LG11                                                        |  | ns          | ns          | ns         | ****        | ****       | ns          | ns          | ns          | ns         | ns          |              |            |             |            |            |             |            |             |            |             |            |             |
| LG12                                                        |  | ns          | ns          | ns         | **          | ****       | ns          | ns          | ns          | ns         | ns          | ns           |            |             |            |            |             |            |             |            |             |            |             |
| LG13                                                        |  | ns          | ns          | ns         | ****        | ****       | ns          | ns          | ns          | ns         | ns          | ns           | ns         |             |            |            |             |            |             |            |             |            |             |
| LG14                                                        |  | ns          | ns          | ns         | ***         | ****       | ns          | ns          | ns          | ns         | ns          | ns           | ns         | ns          |            |            |             |            |             |            |             |            |             |
| LG15                                                        |  | ns          | ns          | ns         | **          | ****       | ns          | ns          | ns          | ns         | ns          | ns           | ns         | ns          | ns         |            |             |            |             |            |             |            |             |
| LG16                                                        |  | ns          | ns          | ns         | *           | ****       | ns          | ns          | ns          | ns         | ns          | ns           | ns         | ns          | ns         | ns         |             |            |             |            |             |            |             |
| LG17                                                        |  | ns          | ns          | ns         | **          | ****       | ns          | ns          | ns          | ns         | ns          | ns           | ns         | ns          | ns         | ns         | ns          |            |             |            |             |            |             |
| LG18                                                        |  | ns          | ns          | ns         | *           | ***        | ns          | ns          | ns          | ns         | ns          | ns           | ns         | ns          | ns         | ns         | ns          | ns         |             |            |             |            |             |
| LG19                                                        |  | ****        | ****        | ****       | *           | ns         | ****        | ****        | ****        | ****       | ****        | ****         | ****       | ****        | ****       | ****       | ****        | ****       | ****        |            |             |            |             |
| LG20                                                        |  | ns          | ns          | ns         | ***         | ****       | ns          | ns          | ns          | ns         | ns          | ns           | ns         | ns          | ns         | ns         | ns          | ns         | ns          | ns         | ****        |            |             |
| LG22                                                        |  | *           | *           | ns         | ns          | **         | ns          | ns          | *           | ns         | ns          | *            | ns         | *           | ns         | ns         | ns          | ns         | ns          | ns         | ****        | ns         |             |
| LG23                                                        |  | ns          | ns          | ns         | ***         | ****       | ns          | ns          | ns          | ns         | ns          | ns           | ns         | ns          | ns         | ns         | ns          | ns         | ns          | ns         | ****        | ns         | ns          |
| Dunn's test to identify outlier chromosomes                 |  |             |             |            |             |            |             |             |             |            |             |              |            |             |            |            |             |            |             |            |             |            |             |
| 24M, 21F                                                    |  |             |             |            |             |            |             |             |             |            |             |              |            |             |            |            |             |            |             |            |             |            |             |
| LG01                                                        |  |             |             |            |             |            |             |             |             |            |             |              |            |             |            |            |             |            |             |            |             |            |             |
| LG02                                                        |  | ns          |             |            |             |            |             |             |             |            |             |              |            |             |            |            |             |            |             |            |             |            |             |
| LG03                                                        |  | ns          | ns          |            |             |            |             |             |             |            |             |              |            |             |            |            |             |            |             |            |             |            |             |
| LG04                                                        |  | ns          | ns          | ns         |             |            |             |             |             |            |             |              |            |             |            |            |             |            |             |            |             |            |             |
| LG05                                                        |  | ****        | ****        | ****       | ****        |            |             |             |             |            |             |              |            |             |            |            |             |            |             |            |             |            |             |
| LG06                                                        |  | ns          | ns          | ns         | ns          | ****       |             |             |             |            |             |              |            |             |            |            |             |            |             |            |             |            |             |
| LG07                                                        |  | ns          | ns          | ns         | ns          | ****       | ns          |             |             |            |             |              |            |             |            |            |             |            |             |            |             |            |             |
| LG08                                                        |  | ns          | ns          | ns         | ns          | ****       | ns          | ns          |             |            |             |              |            |             |            |            |             |            |             |            |             |            |             |
| LG09                                                        |  | ns          | ns          | ns         | ns          | ****       | ns          | ns          | ns          |            |             |              |            |             |            |            |             |            |             |            |             |            |             |
| LG10                                                        |  | ns          | ns          | ns         | ns          | ****       | ns          | ns          | *           | ns         |             |              |            |             |            |            |             |            |             |            |             |            |             |
| LG11                                                        |  | ns          | ns          | ns         | ns          | ****       | ns          | ns          | ns          | ns         | ns          |              |            |             |            |            |             |            |             |            |             |            |             |
| LG12                                                        |  | ns          | ns          | ns         | ns          | ****       | ns          | ns          | ns          | ns         | ns          | ns           |            |             |            |            |             |            |             |            |             |            |             |
| LG13                                                        |  | ns          | ns          | ns         | ns          | ****       | ns          | ns          | ns          | ns         | ns          | ns           | ns         |             |            |            |             |            |             |            |             |            |             |
| LG14                                                        |  | ns          | ns          | ns         | ns          | ****       | ns          | ns          | ns          | ns         | ns          | ns           | ns         | ns          |            |            |             |            |             |            |             |            |             |
| LG15                                                        |  | ns          | ns          | ns         | ns          | ****       | ns          | ns          | ns          | ns         | ns          | ns           | ns         | ns          | ns         |            |             |            |             |            |             |            |             |
| LG16                                                        |  | ns          | ns          | ns         | ns          | ****       | ns          | ns          | ns          | ns         | ns          | ns           | ns         | ns          | ns         | ns         |             |            |             |            |             |            |             |
| LG17                                                        |  | ns          | ns          | ns         | ns          | ****       | ns          | ns          | ns          | ns         | ns          | ns           | ns         | ns          | ns         | ns         | ns          |            |             |            |             |            |             |
| LG18                                                        |  | ns          | ns          | ns         | ns          | ****       | ns          | ns          | ns          | ns         | ns          | ns           | ns         | ns          | ns         | ns         | ns          | ns         |             |            |             |            |             |
| LG19                                                        |  | ****        | ****        | ****       | ****        | ns         | ****        | ****        | ****        | ****       | ****        | ****         | ****       | ****        | ****       | ****       | ****        | ****       | ****        | ****       |             |            |             |
| LG20                                                        |  | ns          | ns          | ns         | ns          | ns         | ns          | ns          | *           | ns         | ns          | ns           | ns         | ns          | ns         | ns         | ns          | ns         | ns          | ns         | ****        |            |             |
| LG22                                                        |  | ns          | ns          | ns         | ns          | ****       | ns          | ns          | ns          | ns         | ns          | ns           | ns         | ns          | ns         | ns         | ns          | ns         | ns          | ns         | ****        | ns         |             |
| LG23                                                        |  | ns          | ns          | ns         | ns          | ****       | ns          | ns          | ns          | ns         | ns          | ns           | ns         | ns          | ns         | ns         | ns          | ns         | ns          | ns         | ****        | ns         | ns          |

| <i>Petrochromis sp. 'orthognathus ikola'</i>                |  | LG01        | LG02       | LG03        | LG04        | LG05       | LG06       | LG07       | LG08       | LG09        | LG10        | LG11       | LG12       | LG13       | LG14       | LG15        | LG16      | LG17        | LG18       | LG19       | LG20      | LG22       | LG23        |   |
|-------------------------------------------------------------|--|-------------|------------|-------------|-------------|------------|------------|------------|------------|-------------|-------------|------------|------------|------------|------------|-------------|-----------|-------------|------------|------------|-----------|------------|-------------|---|
| Sex-specific SNP inspection                                 |  |             |            |             |             |            |            |            |            |             |             |            |            |            |            |             |           |             |            |            |           |            |             |   |
| Individual                                                  |  |             |            |             |             |            |            |            |            |             |             |            |            |            |            |             |           |             |            |            |           |            |             |   |
| Transcriptome                                               |  |             |            |             |             |            |            |            |            |             |             |            |            |            |            |             |           |             |            |            |           |            |             |   |
| Pooled                                                      |  |             |            |             |             |            |            |            |            |             |             |            |            |            |            |             |           |             |            |            |           |            |             |   |
| Kruskal-Wallis for heterogeneity among chromosomes, df = 21 |  |             |            |             |             |            |            |            |            |             |             |            |            |            |            |             |           |             |            |            |           |            |             |   |
| 1M, 1F                                                      |  |             |            |             |             |            |            |            |            |             |             |            |            |            |            |             |           |             |            |            |           |            |             |   |
| chi-squared = 139.37, p-value < 2.2e-16                     |  |             |            |             |             |            |            |            |            |             |             |            |            |            |            |             |           |             |            |            |           |            |             |   |
| Top 1% (# windows per chromosome)                           |  |             |            |             |             |            |            |            |            |             |             |            |            |            |            |             |           |             |            |            |           |            |             |   |
| 1M, 1F                                                      |  |             |            |             |             |            |            |            |            |             |             |            |            |            |            |             |           |             |            |            |           |            |             |   |
| XY                                                          |  | 0           | 0          | 3           | 0           | 19         | 1          | 0          | 0          | 0           | 0           | 1          | 1          | 0          | 0          | 0           | 0         | 0           | 0          | 0          | 36        | 0          | 3           | 0 |
| ZW                                                          |  | 0           | 3          | 5           | 1           | 2          | 0          | 0          | 0          | 1           | 0           | 0          | 0          | 0          | 0          | 1           | 0         | 0           | 0          | 0          | 0         | 0          | 1           | 1 |
| mean per chromosome log2(XY:ZW) ratio of SNP density        |  |             |            |             |             |            |            |            |            |             |             |            |            |            |            |             |           |             |            |            |           |            |             |   |
| 1M, 1F                                                      |  | -0.08787126 | 0.26465304 | -0.00828909 | -0.23012879 | 0.74276756 | 0.06548865 | 0.10832845 | 0.01900148 | -0.23023339 | -0.25249314 | 0.05189691 | 0.15815483 | 0.03630001 | 0.06786996 | -0.02061089 | 0.1940123 | -0.05722613 | 0.26200926 | 0.97016535 | 0.2608027 | 0.00677714 | -0.37425132 |   |
| Dunn's test to identify outlier chromosomes                 |  |             |            |             |             |            |            |            |            |             |             |            |            |            |            |             |           |             |            |            |           |            |             |   |
| 1M, 1F                                                      |  |             |            |             |             |            |            |            |            |             |             |            |            |            |            |             |           |             |            |            |           |            |             |   |
| LG01                                                        |  |             |            |             |             |            |            |            |            |             |             |            |            |            |            |             |           |             |            |            |           |            |             |   |
| LG02                                                        |  | **          |            |             |             |            |            |            |            |             |             |            |            |            |            |             |           |             |            |            |           |            |             |   |
| LG03                                                        |  | ns          | ns         |             |             |            |            |            |            |             |             |            |            |            |            |             |           |             |            |            |           |            |             |   |
| LG04                                                        |  | ns          | ***        | ns          |             |            |            |            |            |             |             |            |            |            |            |             |           |             |            |            |           |            |             |   |
| LG05                                                        |  | ****        | ns         | ***         | ****        |            |            |            |            |             |             |            |            |            |            |             |           |             |            |            |           |            |             |   |
| LG06                                                        |  | ns          | ns         | ns          | *           | **         |            |            |            |             |             |            |            |            |            |             |           |             |            |            |           |            |             |   |
| LG07                                                        |  | ns          | ns         | ns          | *           | **         | ns         |            |            |             |             |            |            |            |            |             |           |             |            |            |           |            |             |   |
| LG08                                                        |  | ns          | ns         | ns          | ns          | **         | ns         | ns         |            |             |             |            |            |            |            |             |           |             |            |            |           |            |             |   |
| LG09                                                        |  | ns          | **         | ns          | ns          | ****       | ns         | ns         | ns         |             |             |            |            |            |            |             |           |             |            |            |           |            |             |   |
| LG10                                                        |  | ns          | ***        | ns          | ns          | ****       | *          | *          | ns         | ns          |             |            |            |            |            |             |           |             |            |            |           |            |             |   |
| LG11                                                        |  | ns          | ns         | ns          | ns          | **         | ns         | ns         | ns         | ns          |             |            |            |            |            |             |           |             |            |            |           |            |             |   |
| LG12                                                        |  | ns          | ns         | ns          | *           | *          | ns         | ns         | ns         | *           | *           | ns         |            |            |            |             |           |             |            |            |           |            |             |   |
| LG13                                                        |  | ns          | ns         | ns          | ns          | **         | ns         | ns         | ns         | ns          | ns          | ns         |            |            |            |             |           |             |            |            |           |            |             |   |
| LG14                                                        |  | ns          | ns         | ns          | ns          | **         | ns         | ns         | ns         | ns          | ns          | ns         | ns         |            |            |             |           |             |            |            |           |            |             |   |
| LG15                                                        |  | ns          | ns         | ns          | ns          | ***        | ns         | ns         | ns         | ns          | ns          | ns         | ns         | ns         |            |             |           |             |            |            |           |            |             |   |
| LG16                                                        |  | *           | ns         | ns          | **          | ns         | ns         | ns         | ns         | *           | **          | ns         | ns         | ns         | ns         |             |           |             |            |            |           |            |             |   |
| LG17                                                        |  | ns          | *          | ns          | ns          | ***        | ns         | ns         | ns         | ns          | ns          | ns         | ns         | ns         | ns         | ns          |           |             |            |            |           |            |             |   |
| LG18                                                        |  | **          | ns         | *           | ***         | ns         | ns         | ns         | ns         | **          | ***         | ns         | ns         | ns         | ns         | *           | ns        |             |            |            | **        |            |             |   |
| LG19                                                        |  | ****        | **         | ****        | ****        | ns         | ****       | ****       | ****       | ****        | ****        | ****       | ****       | ****       | ****       | **          | ****      | *           |            |            | *         |            |             |   |
| LG20                                                        |  | ns          | ns         | ns          | ns          | **         | ns         | ns         | ns         | ns          | ns          | ns         | ns         | ns         | ns         | ns          | ns        | ns          | ns         | *          | ****      |            |             |   |
| LG22                                                        |  | ns          | ns         | ns          | ns          | **         | ns         | ns         | ns         | ns          | ns          | ns         | ns         | ns         | ns         | ns          | ns        | ns          | ns         | *          | ****      | ns         |             |   |
| LG23                                                        |  | ns          | ****       | **          | ns          | ****       | ***        | ****       | *          | ns          | ns          | **         | ***        | **         | **         | *           | ****      | *           | ****       | ****       | *         | **         |             |   |

| <i>Petrochromis orthognathus</i>                            |                                           | LG01        | LG02       | LG03        | LG04       | LG05        | LG06        | LG07        | LG08        | LG09        | LG10        | LG11        | LG12       | LG13       | LG14        | LG15        | LG16        | LG17       | LG18        | LG19        | LG20       | LG22        | LG23       |  |
|-------------------------------------------------------------|-------------------------------------------|-------------|------------|-------------|------------|-------------|-------------|-------------|-------------|-------------|-------------|-------------|------------|------------|-------------|-------------|-------------|------------|-------------|-------------|------------|-------------|------------|--|
| Sex-specific SNP inspection                                 |                                           |             |            |             |            |             |             |             |             |             |             |             |            |            |             |             |             |            |             |             |            |             |            |  |
| Individual                                                  | 1M, 1F                                    |             |            |             |            |             |             |             |             |             |             |             |            |            |             |             |             |            |             |             |            |             |            |  |
| Transcriptome                                               |                                           |             |            |             |            |             |             |             |             |             |             |             |            |            |             |             |             |            |             |             |            |             |            |  |
| Pooled                                                      |                                           |             |            |             |            |             |             |             |             |             |             |             |            |            |             |             |             |            |             |             |            |             |            |  |
| Kruskal-Wallis for heterogeneity among chromosomes, df = 21 |                                           |             |            |             |            |             |             |             |             |             |             |             |            |            |             |             |             |            |             |             |            |             |            |  |
|                                                             | 1M, 1F                                    |             |            |             |            |             |             |             |             |             |             |             |            |            |             |             |             |            |             |             |            |             |            |  |
|                                                             | chi-squared = 104.07, p-value < 5.459e-13 |             |            |             |            |             |             |             |             |             |             |             |            |            |             |             |             |            |             |             |            |             |            |  |
| Top 1% (# windows per chromosome)                           | 1M, 1F                                    |             |            |             |            |             |             |             |             |             |             |             |            |            |             |             |             |            |             |             |            |             |            |  |
| XY                                                          |                                           | 1           | 0          | 6           | 1          | 2           | 1           | 3           | 0           | 1           | 2           | 5           | 0          | 0          | 1           | 0           | 0           | 0          | 0           | 0           | 0          | 6           | 2          |  |
| ZW                                                          |                                           | 2           | 1          | 8           | 2          | 0           | 3           | 0           | 1           | 1           | 3           | 8           | 1          | 1          | 2           | 1           | 1           | 1          | 2           | 0           | 2          | 6           | 2          |  |
| mean per chromosome log2(XY:ZW) ratio of SNP density        |                                           |             |            |             |            |             |             |             |             |             |             |             |            |            |             |             |             |            |             |             |            |             |            |  |
|                                                             | 1M, 1F                                    | -0.13987556 | -0.1343172 | -0.09269267 | 0.19397163 | -0.19232837 | -0.01857782 | -0.18745473 | -0.14208092 | -0.12914689 | -0.12521432 | -0.16823865 | 0.05773962 | 0.36613384 | -0.02135379 | -0.08638872 | -0.11962645 | 0.07006026 | -0.11191857 | -0.05234581 | 0.11321161 | -0.17629457 | -0.2533085 |  |
| Dunn's test to identify outlier chromosomes                 | 1M, 1F                                    |             |            |             |            |             |             |             |             |             |             |             |            |            |             |             |             |            |             |             |            |             |            |  |
|                                                             | LG01                                      |             |            |             |            |             |             |             |             |             |             |             |            |            |             |             |             |            |             |             |            |             |            |  |
|                                                             | LG02                                      | ns          |            |             |            |             |             |             |             |             |             |             |            |            |             |             |             |            |             |             |            |             |            |  |
|                                                             | LG03                                      | ns          | ns         |             |            |             |             |             |             |             |             |             |            |            |             |             |             |            |             |             |            |             |            |  |
|                                                             | LG04                                      | **          | *          | *           |            |             |             |             |             |             |             |             |            |            |             |             |             |            |             |             |            |             |            |  |
|                                                             | LG05                                      | ns          | ns         | ns          | ***        |             |             |             |             |             |             |             |            |            |             |             |             |            |             |             |            |             |            |  |
|                                                             | LG06                                      | ns          | ns         | ns          | ns         | ns          |             |             |             |             |             |             |            |            |             |             |             |            |             |             |            |             |            |  |
|                                                             | LG07                                      | ns          | ns         | ns          | ***        | ns          | ns          |             |             |             |             |             |            |            |             |             |             |            |             |             |            |             |            |  |
|                                                             | LG08                                      | ns          | ns         | ns          | *          | ns          | ns          | ns          |             |             |             |             |            |            |             |             |             |            |             |             |            |             |            |  |
|                                                             | LG09                                      | ns          | ns         | ns          | ns         | ns          | ns          | ns          | ns          |             |             |             |            |            |             |             |             |            |             |             |            |             |            |  |
|                                                             | LG10                                      | ns          | ns         | ns          | *          | ns          | ns          | ns          | ns          | ns          |             |             |            |            |             |             |             |            |             |             |            |             |            |  |
|                                                             | LG11                                      | ns          | ns         | ns          | **         | ns          | ns          | ns          | ns          | ns          | ns          |             |            |            |             |             |             |            |             |             |            |             |            |  |
|                                                             | LG12                                      | ns          | ns         | ns          | ns         | *           | ns          | *           | ns          | ns          | ns          | ns          |            |            |             |             |             |            |             |             |            |             |            |  |
|                                                             | LG13                                      | ***         | ***        | ***         | ns         | ***         | ***         | ***         | ***         | ***         | ***         | *           |            |            |             |             |             |            |             |             |            |             |            |  |
|                                                             | LG14                                      | ns          | ns         | ns          | ns         | ns          | ns          | ns          | ns          | ns          | ns          | ns          | ***        |            |             |             |             |            |             |             |            |             |            |  |
|                                                             | LG15                                      | ns          | ns         | ns          | *          | ns          | ns          | ns          | ns          | ns          | ns          | ns          | ns         | ***        | ns          |             |             |            |             |             |            |             |            |  |
|                                                             | LG16                                      | ns          | ns         | ns          | *          | ns          | ns          | ns          | ns          | ns          | ns          | ns          | ns         | ns         | ns          | ns          |             |            |             |             |            |             |            |  |
|                                                             | LG17                                      | ns          | ns         | ns          | ns         | *           | ns          | *           | ns          | ns          | ns          | ns          | ns         | ns         | ns          | ns          | ns          |            |             |             |            |             |            |  |
|                                                             | LG18                                      | ns          | ns         | ns          | *          | ns          | ns          | ns          | ns          | ns          | ns          | ns          | ns         | ns         | ns          | ns          | ns          | ns         |             |             |            |             |            |  |
|                                                             | LG19                                      | ns          | ns         | ns          | ns         | ns          | ns          | ns          | ns          | ns          | ns          | ns          | ns         | ns         | ns          | ns          | ns          | ns         | ns          |             |            |             |            |  |
|                                                             | LG20                                      | ns          | ns         | ns          | ns         | *           | ns          | *           | ns          | ns          | ns          | ns          | ns         | ns         | ns          | ns          | ns          | ns         | ns          | ns          | ns         |             |            |  |
|                                                             | LG22                                      | ns          | ns         | ns          | ***        | ns          | **          | ns          | ns          | ns          | ns          | ns          | ns         | ns         | ns          | ns          | ns          | ns         | ns          | ns          | ns         | *           | **         |  |
|                                                             | LG23                                      | ns          | ns         | ns          | ***        | ns          | *           | ns          | ns          | ns          | ns          | ns          | **         | ***        | *           | ns          | ns          | ns         | **          | ns          | ns         | *           | ns         |  |

| <i>Petrochromis famula</i>                                         |                                            | LG01       | LG02       | LG03        | LG04        | LG05       | LG06        | LG07        | LG08       | LG09       | LG10        | LG11        | LG12      | LG13        | LG14       | LG15       | LG16       | LG17        | LG18       | LG19       | LG20       | LG22        | LG23       |      |
|--------------------------------------------------------------------|--------------------------------------------|------------|------------|-------------|-------------|------------|-------------|-------------|------------|------------|-------------|-------------|-----------|-------------|------------|------------|------------|-------------|------------|------------|------------|-------------|------------|------|
| <b>Sex-specific SNP inspection</b>                                 |                                            |            |            |             |             |            |             |             |            |            |             |             |           |             |            |            |            |             |            |            |            |             |            |      |
| Individual                                                         | 1M, 1F                                     |            |            |             |             |            |             |             |            |            |             |             |           |             |            |            |            |             |            |            |            |             |            |      |
| Transcriptome                                                      | 3M, 3F                                     |            |            |             |             |            |             |             |            |            |             |             |           |             |            |            |            |             |            |            |            |             |            |      |
| Pooled                                                             |                                            |            |            |             |             |            |             |             |            |            |             |             |           |             |            |            |            |             |            |            |            |             |            |      |
| <b>Kruskal-Wallis for heterogeneity among chromosomes, df = 21</b> |                                            |            |            |             |             |            |             |             |            |            |             |             |           |             |            |            |            |             |            |            |            |             |            |      |
|                                                                    | 1M, 1F                                     |            |            |             |             |            |             |             |            |            |             |             |           |             |            |            |            |             |            |            |            |             |            |      |
|                                                                    | chi-squared = 135.37,<br>p-value < 2.2e-16 |            |            |             |             |            |             |             |            |            |             |             |           |             |            |            |            |             |            |            |            |             |            |      |
| <b>Top 1% (# windows per chromosome)</b>                           |                                            |            |            |             |             |            |             |             |            |            |             |             |           |             |            |            |            |             |            |            |            |             |            |      |
|                                                                    | 1M, 1F                                     |            |            |             |             |            |             |             |            |            |             |             |           |             |            |            |            |             |            |            |            |             |            |      |
| XY                                                                 |                                            | 0          | 2          | 8           | 2           | 8          | 3           | 0           | 0          | 0          | 0           | 1           | 1         | 0           | 0          | 0          | 0          | 0           | 4          | 19         | 0          | 4           | 1          |      |
| ZW                                                                 |                                            | 0          | 0          | 12          | 0           | 0          | 3           | 1           | 0          | 2          | 1           | 2           | 1         | 0           | 0          | 0          | 0          | 1           | 0          | 0          | 0          | 4           | 0          |      |
| <b>mean per chromosome log2(XY:ZW) ratio of SNP density</b>        |                                            |            |            |             |             |            |             |             |            |            |             |             |           |             |            |            |            |             |            |            |            |             |            |      |
|                                                                    | 1M, 1F                                     | -0.1612323 | 0.05263815 | -0.04578219 | -0.17115066 | 0.52094129 | -0.23838237 | -0.18654624 | -0.3254551 | 0.04263553 | -0.04189948 | -0.10934039 | 0.0535841 | -0.07758475 | 0.01759822 | 0.06388001 | 0.14361023 | -0.20726597 | 0.05901171 | 0.92705933 | 0.75498898 | -0.24265895 | 0.00969703 |      |
| <b>Dunn's test to identify outlier chromosomes</b>                 |                                            |            |            |             |             |            |             |             |            |            |             |             |           |             |            |            |            |             |            |            |            |             |            |      |
|                                                                    | 1M, 1F                                     |            |            |             |             |            |             |             |            |            |             |             |           |             |            |            |            |             |            |            |            |             |            |      |
|                                                                    | LG01                                       |            |            |             |             |            |             |             |            |            |             |             |           |             |            |            |            |             |            |            |            |             |            |      |
|                                                                    | LG02                                       | ns         |            |             |             |            |             |             |            |            |             |             |           |             |            |            |            |             |            |            |            |             |            |      |
|                                                                    | LG03                                       | ns         | ns         |             |             |            |             |             |            |            |             |             |           |             |            |            |            |             |            |            |            |             |            |      |
|                                                                    | LG04                                       | ns         | ns         | ns          |             |            |             |             |            |            |             |             |           |             |            |            |            |             |            |            |            |             |            |      |
|                                                                    | LG05                                       | ****       | *          | *           | ***         |            |             |             |            |            |             |             |           |             |            |            |            |             |            |            |            |             |            |      |
|                                                                    | LG06                                       | ns         | *          | *           | ns          | ****       |             |             |            |            |             |             |           |             |            |            |            |             |            |            |            |             |            |      |
|                                                                    | LG07                                       | ns         | ns         | ns          | ns          | ****       | ns          |             |            |            |             |             |           |             |            |            |            |             |            |            |            |             |            |      |
|                                                                    | LG08                                       | ns         | *          | *           | ns          | ****       | ns          | ns          |            |            |             |             |           |             |            |            |            |             |            |            |            |             |            |      |
|                                                                    | LG09                                       | ns         | ns         | ns          | ns          | ns         | *           | ns          | *          |            |             |             |           |             |            |            |            |             |            |            |            |             |            |      |
|                                                                    | LG10                                       | ns         | ns         | ns          | ns          | ns         | *           | ns          | ns         | ns         |             |             |           |             |            |            |            |             |            |            |            |             |            |      |
|                                                                    | LG11                                       | ns         | ns         | ns          | ns          | ns         | **          | ns          | ns         | ns         | ns          |             |           |             |            |            |            |             |            |            |            |             |            |      |
|                                                                    | LG12                                       | ns         | ns         | ns          | ns          | ns         | ns          | *           | ns         | ns         | *           |             |           |             |            |            |            |             |            |            |            |             |            |      |
|                                                                    | LG13                                       | ns         | ns         | ns          | ns          | ns         | **          | ns          | ns         | ns         | ns          | ns          |           |             |            |            |            |             |            |            |            |             |            |      |
|                                                                    | LG14                                       | ns         | ns         | ns          | ns          | ns         | *           | ns          | ns         | *          | *           |             |           |             |            |            |            |             |            |            |            |             |            |      |
|                                                                    | LG15                                       | *          | ns         | ns          | ns          | ns         | **          | **          | *          | **         | ns          | ns          | ns        | ns          | ns         | ns         | ns         | ns          | ns         | ns         | ns         | ns          | ns         | ns   |
|                                                                    | LG16                                       | *          | ns         | ns          | *           | ns         | **          | *           | **         | ns         | ns          | ns          | ns        | ns          | ns         | ns         | ns         | ns          | ns         | ns         | ns         | ns          | ns         | ns   |
|                                                                    | LG17                                       | ns         | ns         | ns          | ns          | ns         | ****        | ns          | ns         | ns         | ns          | ns          | ns        | ns          | ns         | ns         | ns         | ns          | ns         | ns         | ns         | ns          | ns         | ns   |
|                                                                    | LG18                                       | ns         | ns         | ns          | ns          | ns         | *           | ns          | *          | *          | ns          | ns          | ns        | ns          | ns         | ns         | ns         | ns          | ns         | ns         | ns         | ns          | ns         | ns   |
|                                                                    | LG19                                       | ****       | ****       | ****        | ****        | *          | ****        | ****        | ****       | ****       | ****        | ****        | ****      | ****        | ****       | ****       | ****       | ****        | ****       | ****       | ****       | ****        | ****       | **** |
|                                                                    | LG20                                       | ns         | *          | *           | ns          | ****       | ns          | ns          | ns         | *          | ns          | ns          | *         | ns          | *          | **         | **         | **          | ns         | *          | ****       | ns          | ****       | **** |
|                                                                    | LG22                                       | ns         | ns         | ns          | ns          | ****       | ns          | ns          | ns         | ns         | ns          | ns          | ns        | ns          | ns         | ns         | ns         | ns          | ns         | ns         | ****       | ns          | ****       | **** |
|                                                                    | LG23                                       | ns         | ns         | ns          | ns          | *          | *           | ns          | *          | ns         | ns          | ns          | ns        | ns          | ns         | ns         | ns         | ns          | ns         | ns         | ****       | *           | ns         | **** |



| <i>Shuja horei</i>                                                 | LG01     | LG02       | LG03        | LG04        | LG05       | LG06       | LG07        | LG08        | LG09        | LG10        | LG11        | LG12        | LG13        | LG14       | LG15       | LG16        | LG17       | LG18        | LG19       | LG20       | LG22        | LG23        |             |
|--------------------------------------------------------------------|----------|------------|-------------|-------------|------------|------------|-------------|-------------|-------------|-------------|-------------|-------------|-------------|------------|------------|-------------|------------|-------------|------------|------------|-------------|-------------|-------------|
| <b>Sex-specific SNP inspection</b>                                 |          |            |             |             |            |            |             |             |             |             |             |             |             |            |            |             |            |             |            |            |             |             |             |
| Individual                                                         | 1M, 1F   |            |             |             |            |            |             |             |             |             |             |             |             |            |            |             |            |             |            |            |             |             |             |
| Transcriptome                                                      |          |            |             |             |            |            |             |             |             |             |             |             |             |            |            |             |            |             |            |            |             |             |             |
| Pooled                                                             | 25M, 25F |            |             |             |            |            |             |             |             |             |             |             |             |            |            |             |            |             |            |            |             |             |             |
| <b>Kruskal-Wallis for heterogeneity among chromosomes, df = 21</b> |          |            |             |             |            |            |             |             |             |             |             |             |             |            |            |             |            |             |            |            |             |             |             |
| 1M, 1F                                                             |          |            |             |             |            |            |             |             |             |             |             |             |             |            |            |             |            |             |            |            |             |             |             |
| chi-squared = 28.699,<br>p-value < 0.1214                          |          |            |             |             |            |            |             |             |             |             |             |             |             |            |            |             |            |             |            |            |             |             |             |
| 25M, 25F                                                           |          |            |             |             |            |            |             |             |             |             |             |             |             |            |            |             |            |             |            |            |             |             |             |
| chi-squared = 16.897,<br>p-value = 0.7173                          |          |            |             |             |            |            |             |             |             |             |             |             |             |            |            |             |            |             |            |            |             |             |             |
| <b>Top 1% (# windows per chromosome)</b>                           |          |            |             |             |            |            |             |             |             |             |             |             |             |            |            |             |            |             |            |            |             |             |             |
| 1M, 1F                                                             |          |            |             |             |            |            |             |             |             |             |             |             |             |            |            |             |            |             |            |            |             |             |             |
| XY                                                                 |          | 1          | 1           | 8           | 0          | 0          | 3           | 0           | 1           | 1           | 0           | 2           | 0           | 1          | 0          | 1           | 0          | 0           | 5          | 1          | 0           | 3           | 1           |
| ZW                                                                 |          | 1          | 5           | 12          | 6          | 0          | 0           | 0           | 1           | 1           | 3           | 5           | 2           | 2          | 1          | 1           | 0          | 0           | 1          | 1          | 0           | 4           | 3           |
| 25M, 25F                                                           |          |            |             |             |            |            |             |             |             |             |             |             |             |            |            |             |            |             |            |            |             |             |             |
| XY                                                                 |          | 0          | 0           | 19          | 1          | 1          | 1           | 0           | 0           | 1           | 1           | 2           | 3           | 0          | 0          | 0           | 1          | 0           | 1          | 0          | 2           | 5           | 2           |
| ZW                                                                 |          | 0          | 0           | 14          | 3          | 0          | 2           | 1           | 0           | 0           | 1           | 4           | 0           | 1          | 0          | 1           | 2          | 0           | 0          | 0          | 1           | 5           | 2           |
| <b>mean per chromosome log2(XY:ZW) ratio of SNP density</b>        |          |            |             |             |            |            |             |             |             |             |             |             |             |            |            |             |            |             |            |            |             |             |             |
| 1M, 1F                                                             |          | 0.02686779 | -0.05266776 | 0.07176064  | 0.00682543 | 0.14007964 | -0.08366033 | -0.20083164 | -0.04816732 | -0.09344734 | -0.08089556 | -0.03243535 | -0.09478838 | 0.066749   | 0.09012635 | -0.06767505 | 0.00493287 | -0.05229694 | 0.02386329 | 0.08230792 | -0.08985437 | -0.12351962 | -0.12694663 |
| 25M, 25F                                                           |          | 0.04727413 | 0.08849315  | -0.11372084 | 0.06468349 | 0.02296303 | -0.02519691 | 0.12457987  | -0.04915565 | 0.10038783  | 0.04552293  | -0.01915384 | 0.1125893   | 0.02057856 | 0.06504678 | 0.03318058  | 0.09266498 | 0.07207394  | 0.14113329 | 0.11162104 | 0.09536895  | 0.06742895  | 0.0243562   |

| <i>Gnathochromis pfefferi</i>                               |                                         | LG01       | LG02     | LG03       | LG04      | LG05     | LG06      | LG07      | LG08      | LG09     | LG10     | LG11     | LG12     | LG13      | LG14     | LG15      | LG16      | LG17      | LG18     | LG19     | LG20    | LG22    | LG23      |      |
|-------------------------------------------------------------|-----------------------------------------|------------|----------|------------|-----------|----------|-----------|-----------|-----------|----------|----------|----------|----------|-----------|----------|-----------|-----------|-----------|----------|----------|---------|---------|-----------|------|
| Sex-specific SNP inspection                                 |                                         |            |          |            |           |          |           |           |           |          |          |          |          |           |          |           |           |           |          |          |         |         |           |      |
| Individual                                                  | 1M, 1F                                  |            |          |            |           |          |           |           |           |          |          |          |          |           |          |           |           |           |          |          |         |         |           |      |
| Transcriptome                                               |                                         |            |          |            |           |          |           |           |           |          |          |          |          |           |          |           |           |           |          |          |         |         |           |      |
| Pooled                                                      | 23M, 25F                                |            |          |            |           |          |           |           |           |          |          |          |          |           |          |           |           |           |          |          |         |         |           |      |
| Kruskal-Wallis for heterogeneity among chromosomes, df = 21 |                                         |            |          |            |           |          |           |           |           |          |          |          |          |           |          |           |           |           |          |          |         |         |           |      |
|                                                             | 1M, 1F                                  |            |          |            |           |          |           |           |           |          |          |          |          |           |          |           |           |           |          |          |         |         |           |      |
|                                                             | chi-squared = 435.15, p-value < 2.2e-16 |            |          |            |           |          |           |           |           |          |          |          |          |           |          |           |           |           |          |          |         |         |           |      |
|                                                             | 23M, 25F                                |            |          |            |           |          |           |           |           |          |          |          |          |           |          |           |           |           |          |          |         |         |           |      |
|                                                             | chi-squared = 472.63, p-value < 2.2e-16 |            |          |            |           |          |           |           |           |          |          |          |          |           |          |           |           |           |          |          |         |         |           |      |
| Top 1% (# windows per chromosome)                           |                                         |            |          |            |           |          |           |           |           |          |          |          |          |           |          |           |           |           |          |          |         |         |           |      |
|                                                             | 1M, 1F                                  |            |          |            |           |          |           |           |           |          |          |          |          |           |          |           |           |           |          |          |         |         |           |      |
| XY                                                          |                                         | 0          | 1        | 1          | 0         | 0        | 0         | 0         | 0         | 0        | 0        | 42       | 0        | 0         | 0        | 30        | 0         | 0         | 0        | 0        | 0       | 0       | 0         |      |
| ZW                                                          |                                         | 0          | 1        | 1          | 0         | 0        | 0         | 0         | 0         | 0        | 0        | 0        | 0        | 0         | 0        | 1         | 0         | 0         | 0        | 0        | 0       | 0       | 0         |      |
|                                                             | 23M, 25F                                |            |          |            |           |          |           |           |           |          |          |          |          |           |          |           |           |           |          |          |         |         |           |      |
| XY                                                          |                                         | 0          | 0        | 0          | 0         | 0        | 0         | 0         | 0         | 0        | 0        | 43       | 0        | 0         | 0        | 34        | 0         | 0         | 0        | 0        | 0       | 0       | 0         |      |
| ZW                                                          |                                         | 0          | 0        | 0          | 0         | 0        | 0         | 0         | 0         | 0        | 0        | 0        | 0        | 0         | 0        | 0         | 0         | 0         | 0        | 0        | 0       | 0       | 0         |      |
| mean per chromosome log2(XY:ZW) ratio of SNP density        |                                         |            |          |            |           |          |           |           |           |          |          |          |          |           |          |           |           |           |          |          |         |         |           |      |
|                                                             | 1M, 1F                                  | -0.0040927 | -0.19198 | -0.0572042 | 0.1553244 | -0.11228 | 0.0671466 | -0.01349  | -0.044949 | 0.052005 | 0.230076 | 1.667838 | -0.22307 | -0.103063 | 0.155791 | 1.7238181 | -0.00989  | 0.0814072 | -0.02233 | -0.08399 | 0.16687 | -0.0035 | -0.059354 |      |
|                                                             | 23M, 25F                                | 0.1249186  | 0.102177 | -0.0539422 | 0.0574772 | -0.03849 | 0.096668  | -0.007671 | -0.044747 | 0.07653  | -0.01653 | 2.822629 | 0.090778 | 0.04102   | 0.111605 | 2.9428656 | 0.0571178 | 0.0953469 | -0.07069 | -0.10096 | 0.05036 | 0.05332 | 0.1819789 |      |
| Dunn's test to identify outlier chromosomes                 |                                         |            |          |            |           |          |           |           |           |          |          |          |          |           |          |           |           |           |          |          |         |         |           |      |
|                                                             | 1M, 1F                                  |            |          |            |           |          |           |           |           |          |          |          |          |           |          |           |           |           |          |          |         |         |           |      |
|                                                             | LG01                                    |            |          |            |           |          |           |           |           |          |          |          |          |           |          |           |           |           |          |          |         |         |           |      |
|                                                             | LG02                                    | ns         |          |            |           |          |           |           |           |          |          |          |          |           |          |           |           |           |          |          |         |         |           |      |
|                                                             | LG03                                    | ns         | ns       |            |           |          |           |           |           |          |          |          |          |           |          |           |           |           |          |          |         |         |           |      |
|                                                             | LG04                                    | ns         | **       | ns         |           |          |           |           |           |          |          |          |          |           |          |           |           |           |          |          |         |         |           |      |
|                                                             | LG05                                    | ns         | ns       | ns         | *         |          |           |           |           |          |          |          |          |           |          |           |           |           |          |          |         |         |           |      |
|                                                             | LG06                                    | ns         | *        | ns         | ns        | ns       |           |           |           |          |          |          |          |           |          |           |           |           |          |          |         |         |           |      |
|                                                             | LG07                                    | ns         | ns       | ns         | ns        | ns       | ns        |           |           |          |          |          |          |           |          |           |           |           |          |          |         |         |           |      |
|                                                             | LG08                                    | ns         | ns       | ns         | ns        | ns       | ns        | ns        |           |          |          |          |          |           |          |           |           |           |          |          |         |         |           |      |
|                                                             | LG09                                    | ns         | *        | ns         | ns        | ns       | ns        | ns        | ns        |          |          |          |          |           |          |           |           |           |          |          |         |         |           |      |
|                                                             | LG10                                    | *          | ****     | **         | ns        | **       | ns        | **        | *         | ns       |          |          |          |           |          |           |           |           |          |          |         |         |           |      |
|                                                             | LG11                                    | ****       | ****     | ****       | ****      | ****     | ****      | ****      | ****      | ****     |          |          |          |           |          |           |           |           |          |          |         |         |           |      |
|                                                             | LG12                                    | ns         | ns       | ns         | **        | ns       | ns        | ns        | ns        | *        | ***      | ****     |          |           |          |           |           |           |          |          |         |         |           |      |
|                                                             | LG13                                    | ns         | ns       | ns         | *         | ns       | ns        | ns        | ns        | ns       | **       | ****     | ns       |           |          |           |           |           |          |          |         |         |           |      |
|                                                             | LG14                                    | ns         | **       | ns         | ns        | *        | ns        | ns        | ns        | ns       | ns       | ****     | **       | *         |          |           |           |           |          |          |         |         |           |      |
|                                                             | LG15                                    | ****       | ****     | ****       | ****      | ****     | ****      | ****      | ****      | ****     | ****     | ****     | ****     | ****      | ****     | ****      | ****      | ****      | ****     | ****     | ****    | ****    | ****      | **** |
|                                                             | LG16                                    | ns         | ns       | ns         | ns        | ns       | ns        | ns        | ns        | ns       | ns       | ****     | ns       | ns        | ns       | ****      |           |           |          |          |         |         |           |      |
|                                                             | LG17                                    | ns         | ns       | ns         | ns        | ns       | ns        | ns        | ns        | ns       | ns       | ****     | ns       | ns        | ns       | ****      | ns        |           |          |          |         |         |           |      |
|                                                             | LG18                                    | ns         | ns       | ns         | ns        | ns       | ns        | ns        | ns        | ns       | ns       | ****     | ns       | ns        | ns       | ****      | ns        | ns        |          |          |         |         |           |      |
|                                                             | LG19                                    | ns         | ns       | ns         | ns        | ns       | ns        | ns        | ns        | ns       | *        | ****     | ns       | ns        | ns       | ****      | ns        | ns        | ns       |          |         |         |           |      |
|                                                             | LG20                                    | ns         | *        | ns         | ns        | ns       | ns        | ns        | ns        | ns       | ns       | ****     | ns       | ns        | ns       | ****      | ns        | ns        | ns       | ns       |         |         |           |      |
|                                                             | LG22                                    | ns         | ns       | ns         | ns        | ns       | ns        | ns        | ns        | ns       | ns       | *        | ****     | ns        | ns       | ****      | ns        | ns        | ns       | ns       | ns      | ns      |           |      |
|                                                             | LG23                                    | ns         | ns       | ns         | ns        | ns       | ns        | ns        | ns        | ns       | *        | ****     | ns       | ns        | ns       | ****      | ns        | ns        | ns       | ns       | ns      | ns      | ns        |      |
| Dunn's test to identify outlier chromosomes                 |                                         |            |          |            |           |          |           |           |           |          |          |          |          |           |          |           |           |           |          |          |         |         |           |      |
|                                                             | 23M, 25F                                |            |          |            |           |          |           |           |           |          |          |          |          |           |          |           |           |           |          |          |         |         |           |      |
|                                                             | LG01                                    |            |          |            |           |          |           |           |           |          |          |          |          |           |          |           |           |           |          |          |         |         |           |      |
|                                                             | LG02                                    | ns         |          |            |           |          |           |           |           |          |          |          |          |           |          |           |           |           |          |          |         |         |           |      |
|                                                             | LG03                                    | ns         | ns       |            |           |          |           |           |           |          |          |          |          |           |          |           |           |           |          |          |         |         |           |      |
|                                                             | LG04                                    | ns         | ns       | ns         |           |          |           |           |           |          |          |          |          |           |          |           |           |           |          |          |         |         |           |      |
|                                                             | LG05                                    | ns         | ns       | ns         | ns        |          |           |           |           |          |          |          |          |           |          |           |           |           |          |          |         |         |           |      |
|                                                             | LG06                                    | ns         | ns       | ns         | ns        | ns       |           |           |           |          |          |          |          |           |          |           |           |           |          |          |         |         |           |      |
|                                                             | LG07                                    | ns         | ns       | ns         | ns        | ns       | ns        |           |           |          |          |          |          |           |          |           |           |           |          |          |         |         |           |      |
|                                                             | LG08                                    | ns         | ns       | ns         | ns        | ns       | ns        | ns        |           |          |          |          |          |           |          |           |           |           |          |          |         |         |           |      |
|                                                             | LG09                                    | ns         | ns       | ns         | ns        | ns       | ns        | ns        | ns        |          |          |          |          |           |          |           |           |           |          |          |         |         |           |      |
|                                                             | LG10                                    | ns         | ns       | ns         | ns        | ns       | ns        | ns        | ns        | ns       |          |          |          |           |          |           |           |           |          |          |         |         |           |      |
|                                                             | LG11                                    | ****       | ****     | ****       | ****      | ****     | ****      | ****      | ****      | ****     | ****     | ****     | ****     | ****      | ****     | ****      | ****      | ****      | ****     | ****     | ****    | ****    | ****      | **** |
|                                                             | LG12                                    | ns         | ns       | ns         | ns        | ns       | ns        | ns        | ns        | ns       | ns       | ****     |          |           |          |           |           |           |          |          |         |         |           |      |
|                                                             | LG13                                    | ns         | ns       | ns         | ns        | ns       | ns        | ns        | ns        | ns       | ns       | ****     | ns       |           |          |           |           |           |          |          |         |         |           |      |
|                                                             | LG14                                    | ns         | ns       | ns         | ns        | ns       | ns        | ns        | ns        | ns       | ns       | ****     | ns       | ns        |          |           |           |           |          |          |         |         |           |      |
|                                                             | LG15                                    | ****       | ****     | ****       | ****      | ****     | ****      | ****      | ****      | ****     | ****     | ****     | ****     | ****      | ****     | ****      | ****      | ****      | ****     | ****     | ****    | ****    | ****      | **** |
|                                                             | LG16                                    | ns         | ns       | ns         | ns        | ns       | ns        | ns        | ns        | ns       | ns       | ****     | ns       | ns        | ns       | ****      |           |           |          |          |         |         |           |      |
|                                                             | LG17                                    | ns         | ns       | ns         | ns        | ns       | ns        | ns        | ns        | ns       | ns       | ****     | ns       | ns        | ns       | ****      | ns        |           |          |          |         |         |           |      |
|                                                             | LG18                                    | ns         | ns       | ns         | ns        | ns       | ns        | ns        | ns        | ns       | ns       | ****     | ns       | ns        | ns       | ****      | ns        | ns        |          |          |         |         |           |      |
|                                                             | LG19                                    | ns         | ns       | ns         | ns        | ns       | ns        | ns        | ns        | ns       | ns       | ****     | ns       | ns        | ns       | ****      | ns        | ns        | ns       |          |         |         |           |      |
|                                                             | LG20                                    | ns         | ns       | ns         | ns        | ns       | ns        | ns        | ns        | ns       | ns       | ****     | ns       | ns        | ns       | ****      | ns        | ns        | ns       | ns       |         |         |           |      |
|                                                             | LG22                                    | ns         | ns       | ns         | ns        | ns       | ns        | ns        | ns        | ns       | ns       | ****     | ns       | ns        | ns       | ****      | ns        | ns        | ns       | ns       | ns      | ns      |           |      |
|                                                             | LG23                                    | ns         | ns       | *          | ns        | ns       | ns        | ns        | ns        | ns       | ns       | ****     | ns       | ns        | ns       | ****      | ns        | ns        | *        | ns       | ns      | ns      |           |      |













Supplemental Table 3. Representative sample of shared k-mers between *Cyprichromis pavo* and *Petrochromis trewavasae*. One million k-mers were sampled randomly and blasted to determine positional information according to the methods in Behrens et al. (2022).

| <b>LG</b> | <b>K-mers per chromosome</b> | <b>Chromosome length</b> | <b>Normalized</b> |
|-----------|------------------------------|--------------------------|-------------------|
| LG1       | 32,810                       | 38,676,823               | 0.00084831        |
| LG2       | 25,074                       | 32,660,920               | 0.00076771        |
| LG3       | 26,547                       | 37,314,939               | 0.00071143        |
| LG4       | 28,415                       | 30,518,969               | 0.00093106        |
| LG5       | 43,834                       | 36,170,306               | 0.00121188        |
| LG6       | 33,753                       | 39,774,503               | 0.00084861        |
| LG7       | 55,815                       | 64,916,660               | 0.00085979        |
| LG8       | 21,311                       | 23,971,387               | 0.00088902        |
| LG9       | 18,485                       | 21,023,328               | 0.00087926        |
| LG10      | 27,341                       | 32,356,376               | 0.00084500        |
| LG11      | 30,804                       | 32,446,080               | 0.00094939        |
| LG12      | 32,062                       | 34,086,040               | 0.00094062        |
| LG13      | 30,712                       | 32,072,427               | 0.00095758        |
| LG14      | 31,630                       | 37,870,038               | 0.00083522        |
| LG15      | 29,644                       | 34,548,429               | 0.00085804        |
| LG16      | 28,441                       | 34,742,138               | 0.00081863        |
| LG17      | 30,754                       | 35,776,103               | 0.00085962        |
| LG18      | 27,084                       | 29,505,383               | 0.00091793        |
| LG19      | 26,186                       | 25,963,618               | 0.00100857        |
| LG20      | 29,234                       | 29,789,237               | 0.00098136        |
| LG22      | 30,631                       | 34,725,690               | 0.00088208        |
| LG23      | 35,805                       | 42,088,218               | 0.00085071        |
|           |                              | <b>Mean</b>              | 0.00089327        |
|           |                              | <b>STD</b>               | 0.00009853        |

# Figures

*Simochromis diagramma*  $F_{ST}$

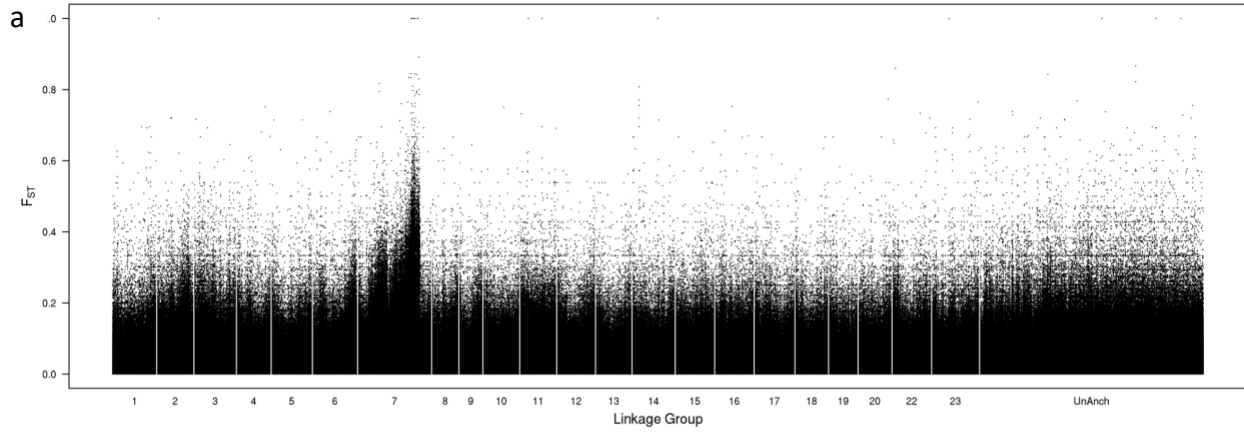

*Simochromis diagramma* XY patterned SNPs

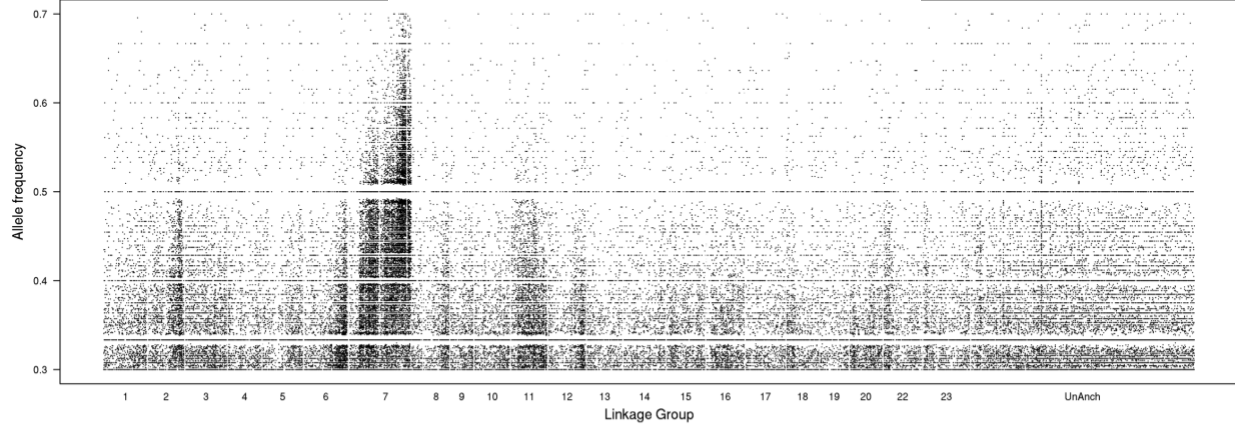

*Simochromis diagramma* ZW patterned SNPs

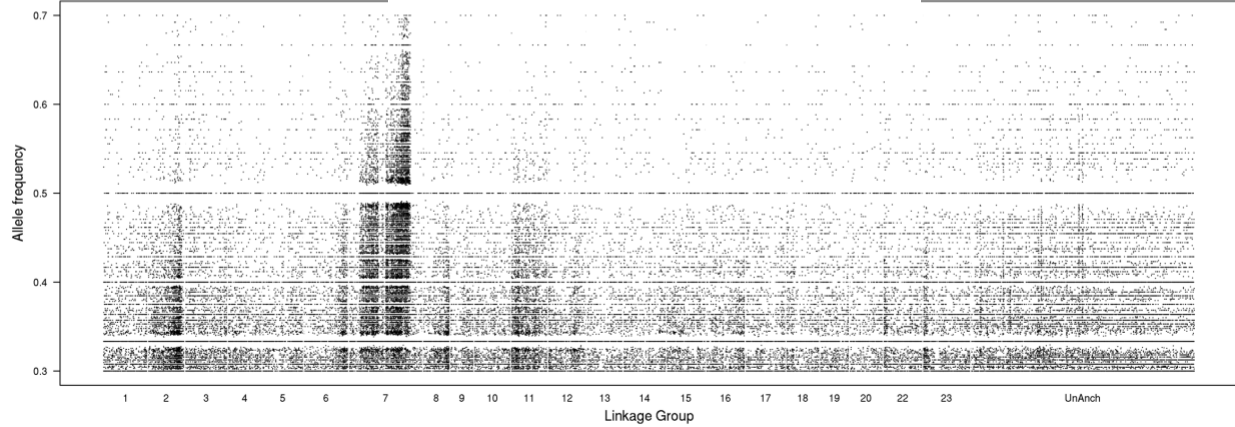

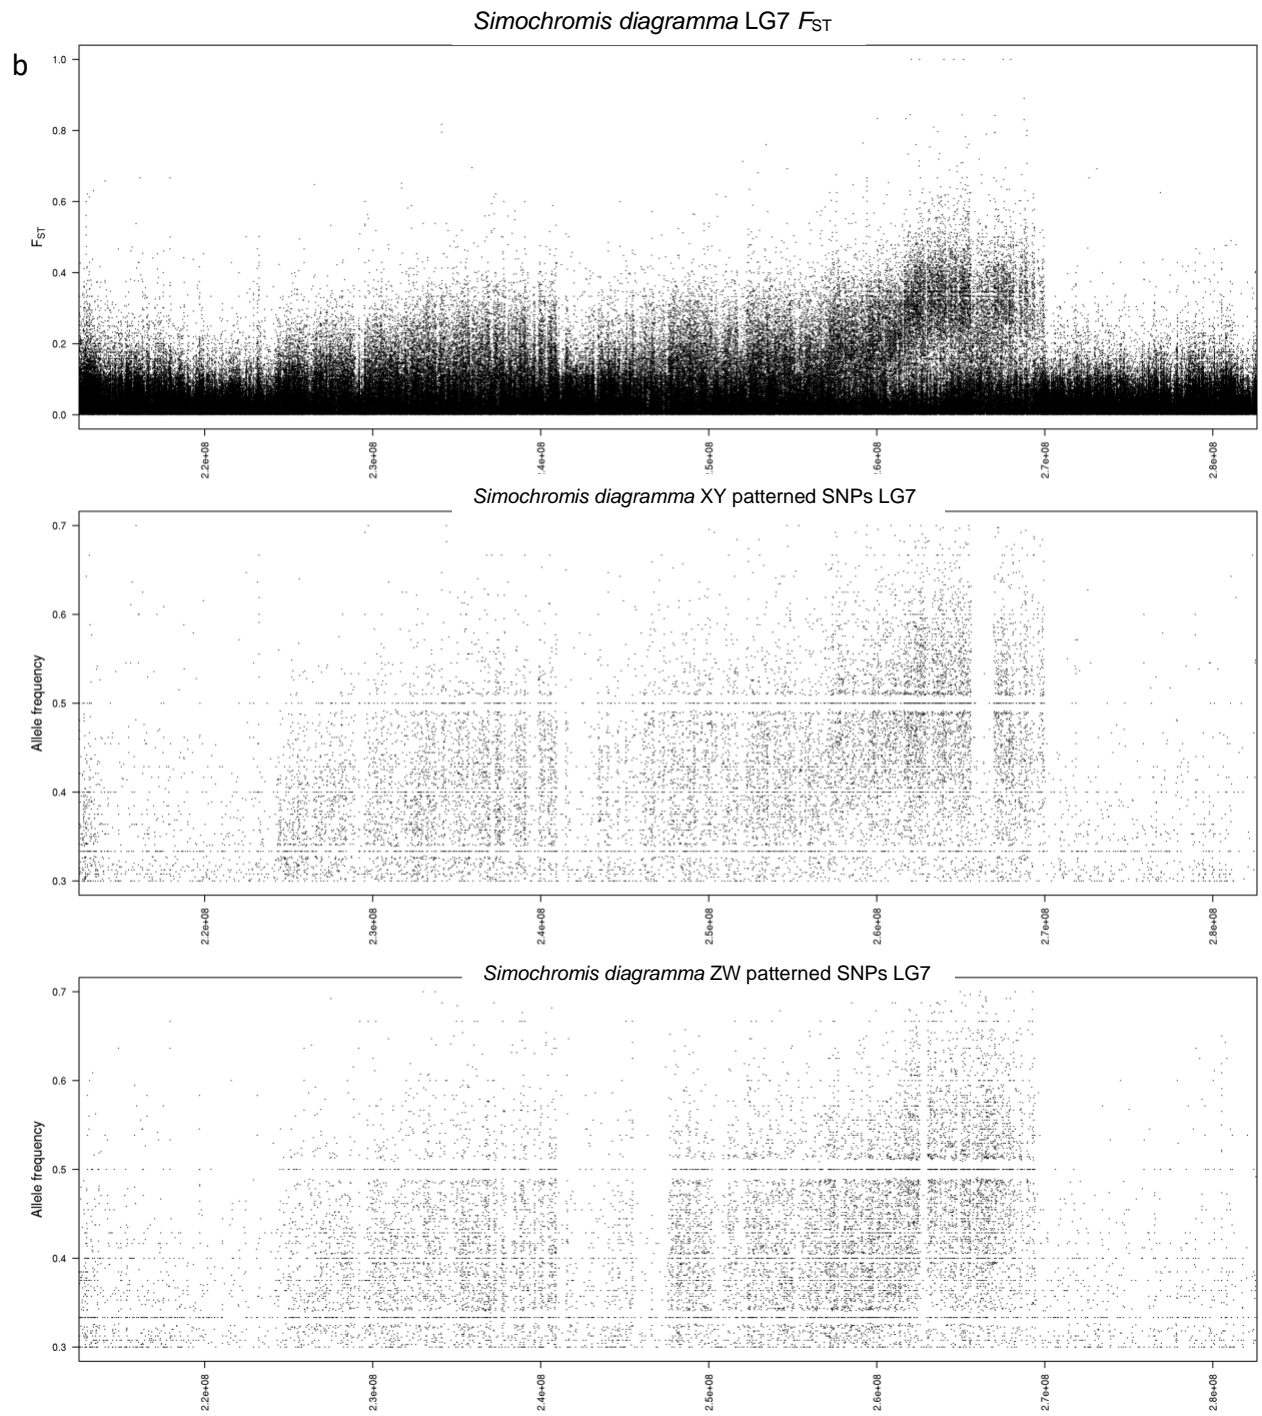

Supplemental Figure 1. Pairwise male x female  $F_{ST}$  and sex specific allele frequency for *S. diagramma* a) whole genome plot, b) LG7 plot.



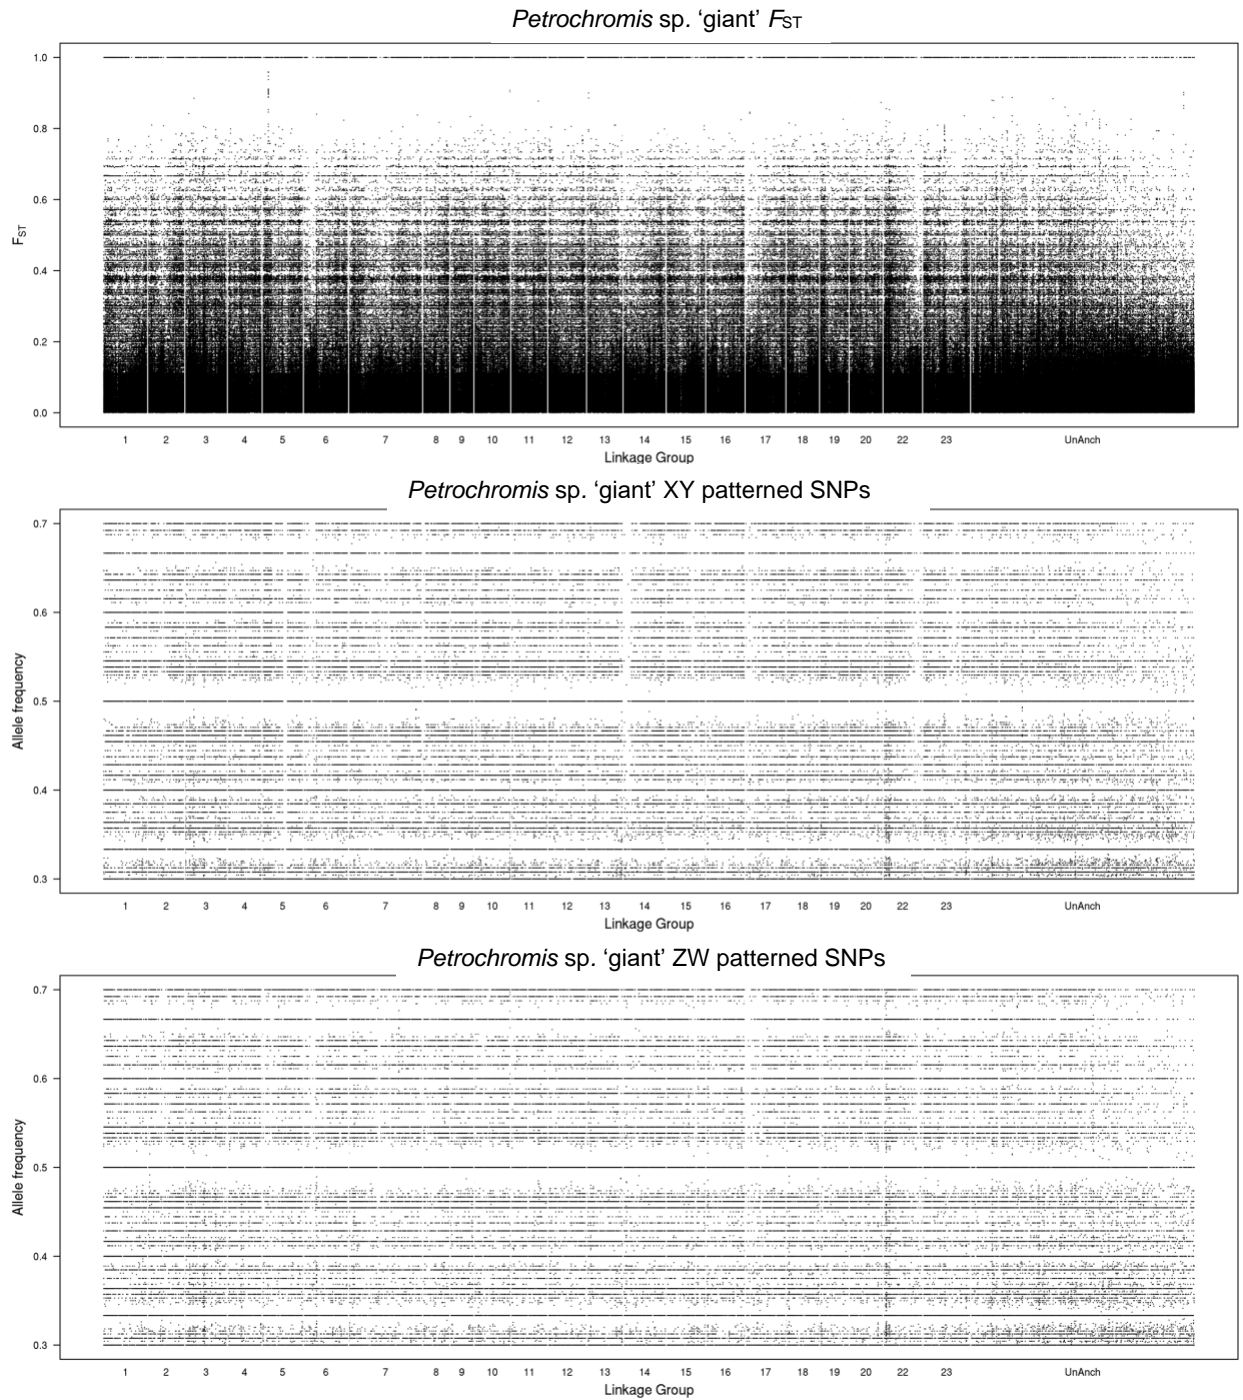

Supplemental Figure 2. Pairwise male x female  $F_{ST}$  and sex specific allele frequency for *P. sp. 'giant'* depicting the elevated heterozygosity seen in some species.

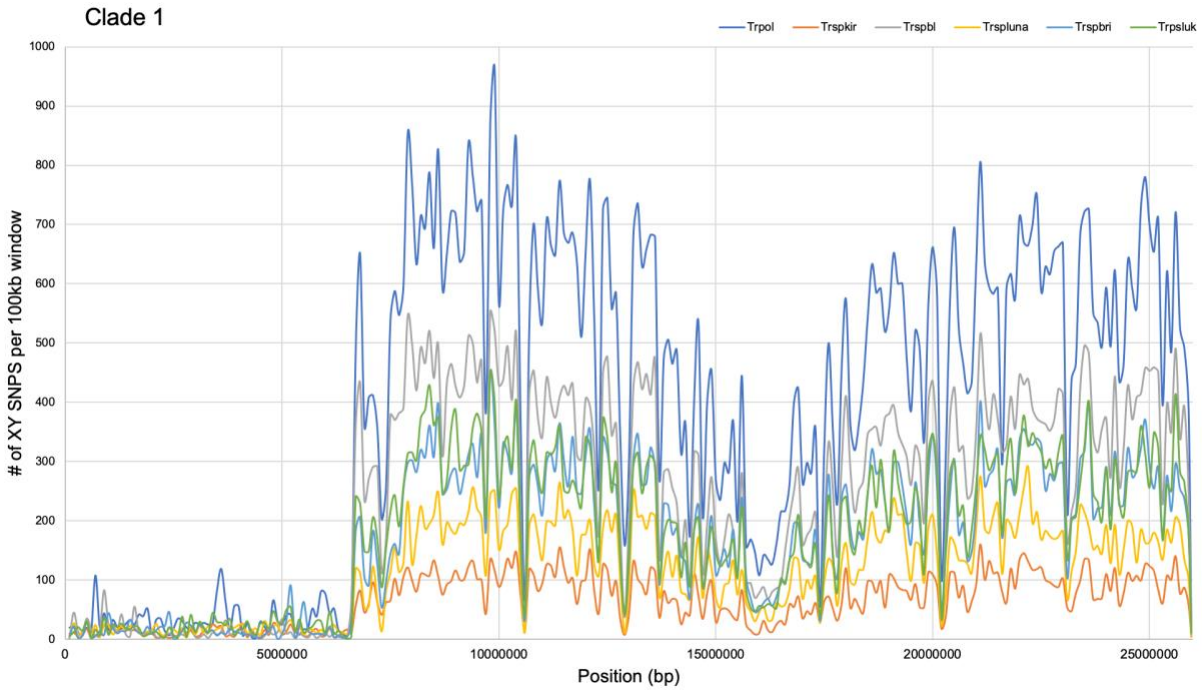

Supplemental Figure 3. Plot of XY SNP density by 100kb window for all Clade 1 species for LG19. For all species the sex-determining region occupies the same region of the chromosome and features no further expansion. The variation in the number of sex-patterned SNPs likely reflect differences in  $N_e$  among species.

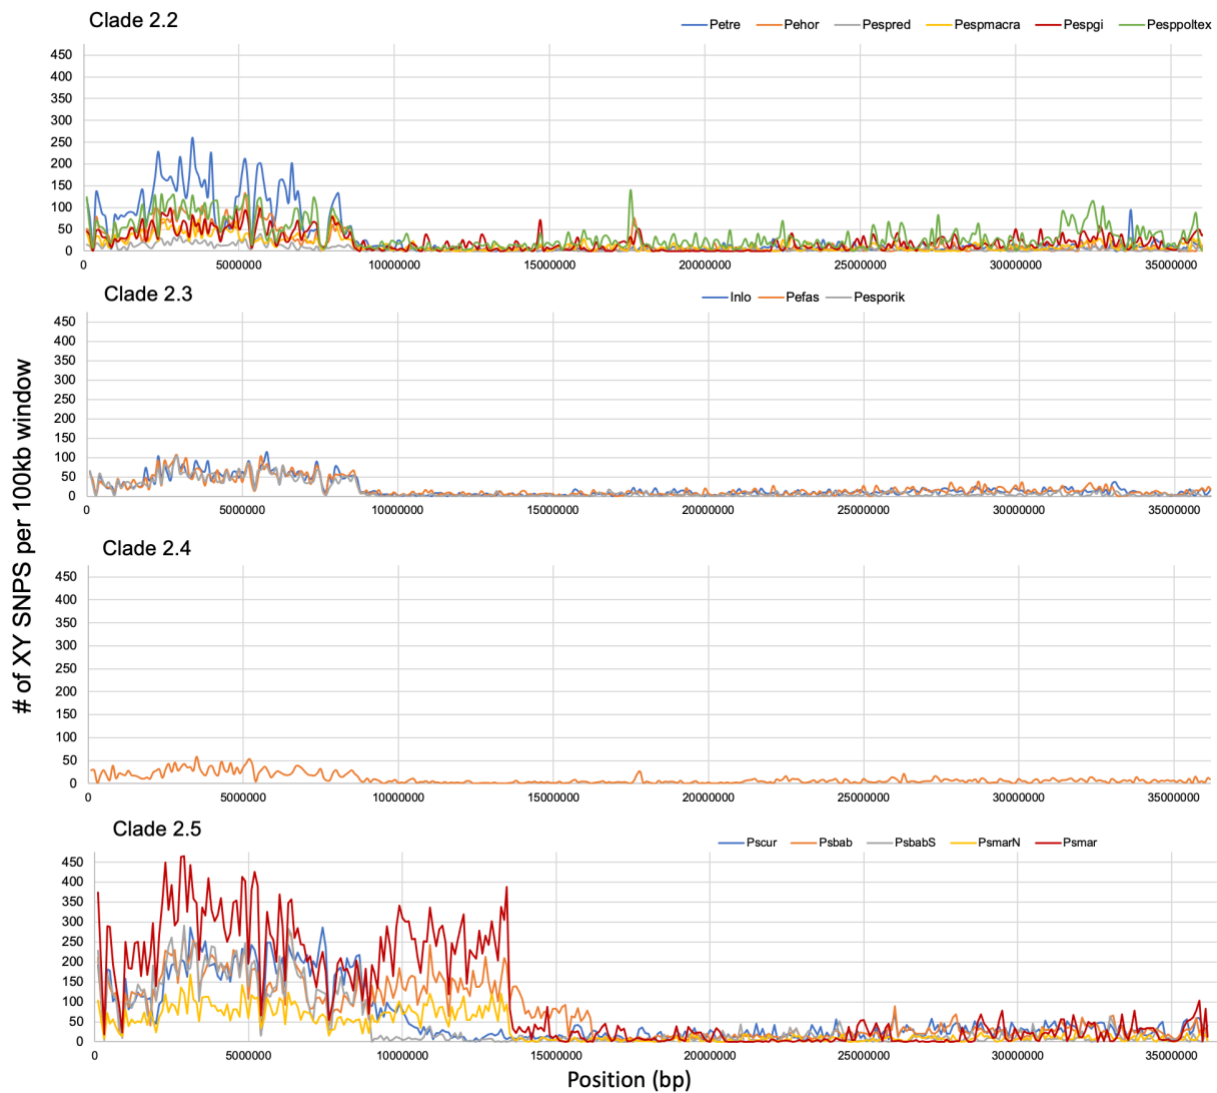

Supplemental Figure 4. Plot of XY SNP density by 100kb window for all Clade 2 species for LG5, demonstrating varying spatial extent of differentiation in the several sub-lineages of Clade 2. Species name abbreviations are Petre = *Petrochromis trewavasae*, Pehor = *Petrochromis horii*, Pespred = *Petrochromis* sp. ‘red’, Pespmacra = *Petrochromis* sp. ‘macrognathus rainbow’, Pespghi = *Petrochromis* sp. ‘giant’, Pesppoltex = *Petrochromis* sp. ‘polyodon texas’, Inlo = *Interochromis loocki*, Pefas = *Petrochromis fasciolatus*, Pesporik = *Petrochromis* sp. ‘orthognathus ikola’, Clade 2.4 is *Petrochromis famula*, Pscur = *Pseudosimochromis curvifrons*, Psbab = *Pseudosimochromis babaulti*, PsbabS = *Pseudosimochromis babaulti* South, PsmarN = *Pseudosimochromis marginatus* North, Psmar = *Pseudosimochromis marginatus*.

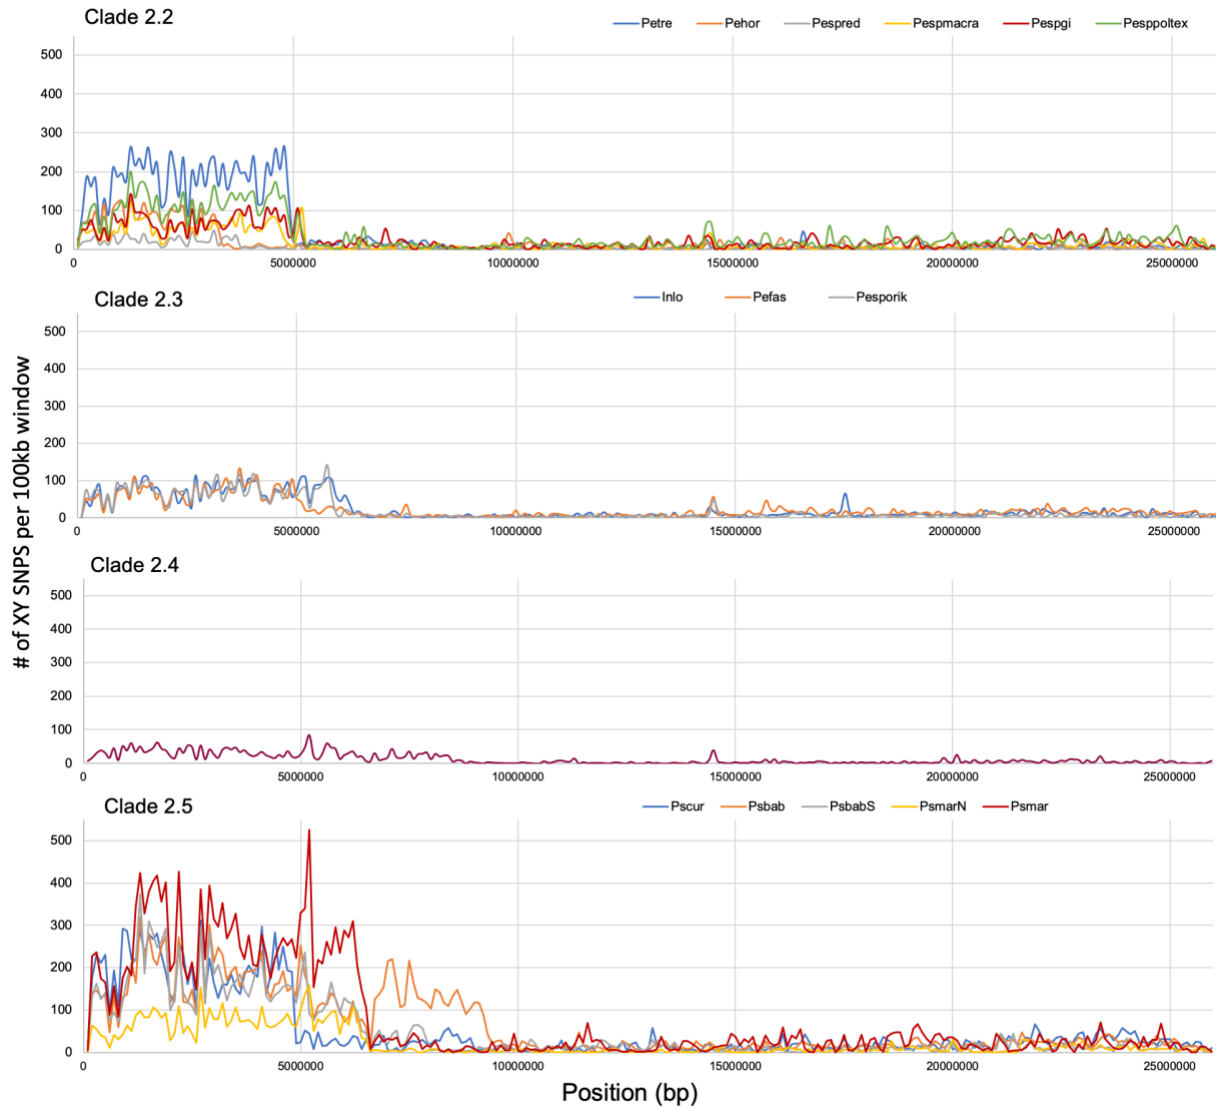

Supplemental Figure 5. Plot of XY SNP density by 100kb window for all Clade 2 species for LG19, demonstrating varying spatial extent of differentiation in the several sub-lineages of Clade 2. Species name abbreviations are Petre = *Petrochromis trewasasae*, Pehor = *Petrochromis horii*, Pespred = *Petrochromis* sp. ‘red’, Pespmacra = *Petrochromis* sp. ‘macrognathus rainbow’, Pespigi = *Petrochromis* sp. ‘giant’, Pesppoltex = *Petrochromis* sp. ‘polyodon texas’, Inlo = *Interochromis loocki*, Pefas = *Petrochromis fasciolatus*, Pesporik = *Petrochromis* sp. ‘orthognathus ikola’, Clade 2.4 is *Petrochromis famula*, Pscur = *Pseudosimochromis curvifrons*, Psbab = *Pseudosimochromis babaulti*, PsbabS = *Pseudosimochromis babaulti* South, PsmarN = *Pseudosimochromis marginatus* North, Psmar = *Pseudosimochromis marginatus*.
